# Supplementary material for: Activity-dependent modulation of synapse-regulating genes in astrocytes
Source: eLife. 2021 Sep 8;10:e70514. doi: 10.7554/eLife.70514 (PMC8497060; doi:10.7554/eLife.70514)
Supplement: Figure 1—source data 1. — (A) Complete list of genes (expression levels shown as FPKM) at each developmental stage as indicated. Expression levels for each sample, as well as average, are shown, as well as pairwise analysis and false discovery rate (FDR) values. (B) Complete list of Gene Ontology (GO) terms (Biological Process) identified for astrocyte-enriched genes at each developmental time point as indicated. [file elife-70514-fig1-data1.xlsx]

## Sheet: Figure 1-Source Data 1A
Related to	Figure 1, Figure 1-figure supplement 1	Complete list of genes (expression levels shown as FPKM) at each developmental stage as indicated. Expression levels for each sample, as well as average are shown. Pairwise analysis FDR values are also shown
	Gene	Annotation	Transcript	P7 Avg FPKM	P14 Avg FPKM	P28 Avg FPKM	P120 Avg FPKM	P7/IN	P14/IN	P28/IN	P120/IN	P14.vs..P7.Log2.FC	P14.vs..P7.p.value	P14.vs..P7.adj..p.value	P28.vs..P7.Log2.FC	P28.vs..P7.p.value	P28.vs..P7.adj..p.value	P7 vs. P120 Log2 FC	P7 vs. P120 p-value	P7 vs. P120 adj. p-value	P14.vs..P28.Log2.FC	P14.vs..P28.p.value	P14.vs..P28.adj..p.value	P14 vs. P120 Log2 FC	P14 vs. P120 p-value	P14 vs. P120 adj. p-value	P28 vs. P120 Log2 FC	P28 vs. P120 p-value	P28 vs. P120 adj. p-value	P7_1 FPKM	P7_2 FPKM	P7_3 FPKM	P14_1 FPKM	P14_2 FPKM	P14_3 FPKM	P14_4 FPKM	P28_1 FPKM	P28_2 FPKM	P28_3 FPKM	P28_4 FPKM	P28_5 FPKM	P120_1 FPKM	P120_4 FPKM	P120_5 FPKM	P120_VC_rep1 FPKM	P120_VC_rep2 FPKM	P120_VC_rep3 FPKM	P7_IN2 FPKM	P14_IN FPKM
Developmental astrocyte transcriptome	0610005C13Rik	0610005C13Rik|AI182092|-|7 B3|7|ncRNA	NR_038166	0.0426667	0.07575	0.0944	0.0568333	0.10183	0.423184	0.597468	#DIV/0!	-0.264318	0.595	0.753	-0.685789	0.363	0.499	0.53	0.741	0.827	0.103255	0.722	0.91	-0.363	0.786	0.879	0.839084	0.483055	0.700794	0.017	0	0.111	0	0.016	0.116	0.171	0.087	0.095	0	0.107	0.183	0	0.135	0.017	0	0.128	0.061	0.419	0.179
	0610007P14Rik	0610007P14Rik|1190004E09Rik|AU019315|C77855|ORF11|-|12|12 D2|protein-coding	NM_021446	96.8693	64.0433	47.1184	46.3215	2.29119	1.88435	1.5332	1.15196	0.382935	0.0703	0.181	0.708738	5.27e-08	3.73e-07	-0.864	0.000138	0.000644	-0.293595	0.0847	0.35	-0.471	0.0402	0.119	0.15912	0.368581	0.610754	90.519	105.641	94.448	78.073	49.751	60.059	68.29	46.808	49.63	44.19	47.492	47.472	35.804	59.514	47.423	45.419	45.149	44.62	42.279	33.987
	0610009B22Rik	0610009B22Rik|-|-|11|11 B1.3|protein-coding	NM_025319	18.1953	18.5385	18.8038	17.5648	1.06325	1.07209	1.10976	0.722476	-0.216481	0.271	0.461	-0.359215	0.0204	0.0468	0.15	0.472	0.606	0.133695	0.388	0.733	-0.0789	0.684	0.809	0.223743	0.169217	0.396345	16.682	20.895	17.009	20.986	16.987	16.432	19.749	21.715	17.636	18.365	16.449	19.854	17.087	20.068	16.589	17.329	17.272	17.044	17.113	17.292
	0610009L18Rik	0610009L18Rik|-|-|11|11 E2|ncRNA	NR_038126	2.61333	4.25725	6.6324	7.3635	0.8808	1.26066	1.98456	1.3999	-0.730987	0.0516	0.145	-1.49283	0.000302	0.00112	1.7	0.000304	0.0013	0.565496	0.0628	0.292	0.842	0.0404	0.119	-0.0649831	0.873327	0.94236	1.609	2.09	4.141	3.304	2.413	4.564	6.748	7.751	5.523	2.099	8.493	9.296	4.855	14.517	7.298	5.092	7.053	5.366	2.967	3.377
	0610009O20Rik	0610009O20Rik|2700004E22Rik|Dele|Kiaa0141|-|18|18 B3|protein-coding	NM_024179	19.874	17.7028	20.2366	23.6103	1.61485	1.32446	1.67883	2.08959	-0.0283487	0.884	0.939	-0.346657	0.00293	0.0086	0.426	0.000633	0.00249	0.305977	0.0406	0.224	0.393	0.0104	0.0427	-0.0703884	0.45244	0.678801	20.183	19.344	20.095	19.375	15.702	20.248	15.486	21.52	19.293	20.724	19.447	20.199	21.446	19.83	24	26.768	24.298	25.32	12.307	13.366
	0610010B08Rik	0610010B08Rik|Gm2026|-|2|2 H4|protein-coding	NM_001177543	0	0	0	0	#DIV/0!	#DIV/0!	#DIV/0!	#DIV/0!	NA	1	1	NA	1	1	NA	1	1	NA	1	1	NA	1	1	NA	1	1	0	0	0	0	0	0	0	0	0	0	0	0	0	0	0	0	0	0	0	0
	0610010F05Rik	0610010F05Rik|Kiaa1841|mKIAA1841|-|11|11 A3.2|protein-coding	NM_001347242	9.16133	3.741	2.4512	1.84283	0.256218	0.251614	0.267598	0.293025	1.05421	2.07e-07	5.28e-06	1.54943	3.53e-15	5.7e-14	-2.15	1.36e-13	2.33e-12	-0.443846	0.0121	0.104	-1.06	5.73e-05	0.00062	0.585273	0.0182023	0.0967373	11.556	8.139	7.789	3.232	4.569	3.812	3.351	3.01	2.423	2.737	1.759	2.327	1.853	0.652	2.121	2.285	1.923	2.223	35.756	14.868
	0610010K14Rik	0610010K14Rik|1110020A23Rik|AL033328|AU045833|Bap18|-|11|11 B3|protein-coding	NM_001177603	38.5663	24.8155	24.3368	31.2298	1.25	0.962699	0.950174	0.887161	0.404478	0.0846	0.206	0.315923	0.121	0.212	-0.0539	0.865	0.913	0.0941457	0.648	0.879	0.366	0.222	0.389	-0.25949	0.322672	0.570005	32.419	40.848	42.432	25.059	17.475	23.677	33.051	25.218	18.436	19.806	31.582	26.642	22.469	49.709	36.386	24.236	29.311	25.268	30.853	25.777
	0610012G03Rik	0610012G03Rik|AI839730|-|16|16 B2|ncRNA	NR_027897	23.0647	21.21	24.6124	27.3812	0.785501	0.734062	1.0109	1.0791	-0.0533498	0.848	0.916	-0.400906	0.0974	0.177	0.468	0.177	0.294	0.297888	0.236	0.589	0.404	0.247	0.418	-0.0464843	0.877537	0.944471	19.719	24.008	25.467	19.653	12.374	20.248	32.565	23.303	21.914	15.001	33.441	29.403	19.192	47.718	28.123	21.268	23.49	24.496	29.363	28.894
	0610030E20Rik	0610030E20Rik|1500031N04Rik|2810411C16Rik|AI461894|-|6 C1|6|protein-coding	NM_026696	1.44767	1.689	1.169	1.05317	0.406648	0.609088	0.546517	0.809506	-0.401328	0.0338	0.106	-0.00844508	0.971	0.982	-0.295	0.13	0.23	-0.364969	0.0685	0.307	-0.713	3.45e-05	0.000398	0.31099	0.132315	0.344565	1.399	1.421	1.523	1.783	1.636	1.591	1.746	0.78	0.92	1.105	1.255	1.785	0.934	0.678	1.448	1.131	0.948	1.18	3.56	2.773
	0610031O16Rik	0610031O16Rik|-|-|3|3 G3|ncRNA	NR_045760	0	0	0	0	#DIV/0!	0	0	#DIV/0!	NA	1	1	NA	1	1	NA	1	1	NA	1	1	NA	1	1	NA	1	1	0	0	0	0	0	0	0	0	0	0	0	0	0	0	0	0	0	0	0	0.027
	0610037L13Rik	0610037L13Rik|1110008H16Rik|-|4|4 C7|protein-coding	NM_001347160	21.4037	19.851	20.5966	22.7405	1.66371	1.59101	1.94804	1.69377	-0.0790677	0.751	0.859	-0.265945	0.143	0.243	0.311	0.355	0.492	0.165987	0.445	0.774	0.22	0.507	0.673	-0.0299381	0.914088	0.963884	21.646	20.305	22.26	21.715	11.899	22.424	23.366	21.368	20.985	15.218	24.089	21.323	17.108	38.852	25.159	17.845	19.078	18.401	12.865	12.477
	0610038B21Rik	0610038B21Rik|-|-|8|8 C1|ncRNA	NR_028125	0.00433333	0.01325	0.0722	0.201167	0.0257937	0.0828125	0.232903	0.506717	-0.207301	0.556	1	-2.0132	0.00746	0.0196	5.59	8.15e-05	0.0004	0.590558	0.0498	0.253	3.76	0.000318	0.00261	-1.22907	0.100486	0.293415	0.013	0	0	0	0.035	0	0.018	0.064	0.105	0.075	0.117	0	0.049	0.422	0.327	0.182	0.07	0.157	0.168	0.16
	0610039H22Rik	0610039H22Rik|-|-|11|11 C|ncRNA	NR_131025	0.072	0.034	0.0316	0.0628333	#DIV/0!	1.13333	#DIV/0!	1.01344	0.204956	0.654	1	0.330133	0.657	0.761	-0.03	0.986	0.991	0.00605803	0.978	1	0.815	0.637	0.774	-0.75931	0.635947	1	0.131	0	0.085	0	0.099	0	0.037	0	0	0.023	0.041	0.094	0	0.156	0	0.127	0	0.094	0	0.03
	0610039K10Rik	0610039K10Rik|-|-|2|2 H3|ncRNA	NR_028113	0.289	0.251	0.271	0.437333	1.29018	0.566591	0.380084	0.491386	0.0121908	0.979	0.99	-0.128345	0.815	0.881	0.741	0.26	0.392	0.0930619	0.783	0.929	0.754	0.192	0.354	-0.578023	0.318957	0.566142	0.241	0.452	0.174	0.245	0.17	0.274	0.315	0.308	0.224	0.173	0.219	0.431	0.059	0.358	0.835	0.486	0.563	0.323	0.224	0.443
	0610040B10Rik	0610040B10Rik|-|-|5|5 G2|ncRNA	NR_027874	3.18133	2.676	2.8608	2.81517	1.92575	1.05729	0.966813	0.664111	0.0282792	0.938	0.969	-0.101686	0.766	0.847	0.0905	0.869	0.916	0.114496	0.689	0.898	0.124	0.807	0.892	0.0606987	0.893396	0.953157	2.18	4.024	3.34	3.901	2.498	1.385	2.92	4.011	2.918	1.946	2.311	3.118	3.676	6.126	2.191	1.547	1.792	1.559	1.652	2.531
	0610040F04Rik	0610040F04Rik|-|-|6|6 E1-E2|ncRNA	NR_104577	0.688667	0.82175	1.2548	2.61417	2.33446	1.1656	0.435997	1.02236	-0.396678	0.234	0.418	-1.14094	0.000203	0.000777	2.07	1.5e-06	1.02e-05	0.635989	0.0108	0.0963	1.62	2.73e-05	0.00033	-0.869438	0.0132792	0.0784513	0.706	0.919	0.441	0.505	1.068	0.927	0.787	0.903	1.508	1.042	1.084	1.737	1.169	2.054	5.995	2.6	2.289	1.578	0.295	0.705
	0610040J01Rik	0610040J01Rik|AI662686|-|5|5 C3.1|protein-coding	NM_029554	16.3197	19.6788	12.9052	6.674	5.58319	4.02593	3.69565	2.39555	-0.448201	0.0598	0.161	0.00766829	0.953	0.971	-1.09	5.11e-08	4.31e-07	-0.439882	0.0255	0.169	-1.57	4.02e-11	1.94e-09	1.09201	1.83e-11	6.09e-09	17.221	16.108	15.63	24.925	13.127	20.5	20.163	11.571	12.626	12.569	14.28	13.48	6.046	7.745	7.703	6.61	6.373	5.567	2.923	4.888
	0610043K17Rik	0610043K17Rik|-|-|4|4 C6|ncRNA	NR_040640	0	0.15925	0.2344	0.4595	0	0.733871	2.44167	1.16921	-1.3331	0.00975	0.0407	-2.25589	0.00284	0.00836	6.44	2.47e-06	1.61e-05	0.219608	0.508	0.81	1.53	0.0164	0.0605	-0.937462	0.1913	0.425497	0	0	0	0.158	0.205	0.141	0.133	0	0.434	0.134	0.048	0.556	0.671	0.308	0.872	0.452	0.232	0.222	0.069	0.217
	1010001N08Rik	1010001N08Rik|Gata6as|-|18|18 A1|ncRNA	NR_105023	0	0	0	0	#DIV/0!	#DIV/0!	#DIV/0!	#DIV/0!	NA	1	1	NA	1	1	NA	1	1	NA	1	1	NA	1	1	NA	1	1	0	0	0	0	0	0	0	0	0	0	0	0	0	0	0	0	0	0	0	0
	1110002J07Rik	1110002J07Rik|-|-|10|10 B5.1|ncRNA	NR_138561	0.960333	0.5595	0.266	0.14	0.326866	0.685662	1.60241	1.00719	0.499972	0.106	0.243	1.53825	8.68e-06	4.37e-05	-2.52	3.95e-08	3.39e-07	-0.801778	0.00683	0.0692	-1.97	1.45e-05	0.000189	0.916504	0.0559175	0.202013	1.279	0.791	0.811	0.467	0.66	0.332	0.779	0.2	0.327	0.302	0.152	0.349	0.23	0.135	0.123	0.157	0.073	0.122	2.938	0.816
	1110002L01Rik	1110002L01Rik|-|-|12|12 A1.1|ncRNA	NR_030694	9.748	7.632	6.4742	7.48233	0.463771	0.324035	0.34973	0.461787	0.159564	0.444	0.631	0.267528	0.073	0.139	-0.237	0.371	0.508	-0.0915463	0.59	0.853	-0.0717	0.779	0.874	-0.0239592	0.911598	0.962509	11.375	9.576	8.293	5.524	8.091	6.925	9.988	7.371	6.056	5.928	5.581	7.435	3.912	4.115	9.169	8.81	9.229	9.659	21.019	23.553
	1110004E09Rik	1110004E09Rik|-|-|16|16 C3.3|protein-coding	NM_026502	17.7883	14.701	15.2366	20.1508	1.10858	0.933278	0.880423	0.815097	0.0848805	0.616	0.769	-0.0919068	0.486	0.614	0.36	0.046	0.0995	0.175348	0.165	0.498	0.443	0.00591	0.0279	-0.259337	0.0616386	0.214924	17.358	17.582	18.425	14.452	13.602	14.266	16.484	16.237	13.611	15.301	14.526	16.508	15.8	21.288	24.613	17.884	20.587	20.733	16.046	15.752
	1110004F10Rik	1110004F10Rik|Smacp|Smap|sid2057|sid2057p|-|7|7 F1|protein-coding	NM_019772	48.0653	34.1975	33.2042	32.4735	0.865668	0.764173	0.845106	0.790071	0.295496	0.0585	0.159	0.209596	0.112	0.199	-0.386	0.00501	0.0154	0.0899994	0.509	0.811	-0.0872	0.508	0.673	0.181708	0.138457	0.353456	48.802	49.528	45.866	31.304	31.59	33.963	39.933	37.762	33.102	29.378	31.271	34.508	26.623	31.337	38.805	31.355	31.83	34.891	55.524	44.751
	1110006O24Rik	1110006O24Rik|-|-|5|5 F|ncRNA	NR_027810	1.04667	1.159	0.6952	0.578667	1.71585	2.50866	1.50803	0.817326	-0.293145	0.402	0.594	0.227372	0.565	0.686	-0.704	0.0853	0.164	-0.453654	0.105	0.395	-1.05	0.00187	0.0111	0.470825	0.194247	0.429848	1.095	0.729	1.316	1.013	1.286	0.847	1.49	0.509	0.694	0.812	0.66	0.801	0.464	0.542	0.529	0.442	0.605	0.89	0.61	0.462
	1110008F13Rik	1110008F13Rik|AI316789|-|2|2 H1|protein-coding	NM_026124	69.6787	74.338	58.563	49.4745	1.22415	1.24542	1.15311	0.791896	-0.26734	0.261	0.449	-0.0663679	0.725	0.816	-0.272	0.39	0.526	-0.19349	0.342	0.697	-0.56	0.0637	0.165	0.347909	0.173804	0.40238	59.062	77.861	72.113	83.389	53.662	63.617	96.684	52.255	49.675	48.433	72.012	70.44	40.077	80.041	44.459	41.985	44.384	45.901	56.92	59.689
	1110008L16Rik	1110008L16Rik|Kiaa0391|Mrpp3|mKIAA0391|-|12|12 C1|protein-coding	NM_025373	1.72033	1.51975	1.1916	1.25767	0.721919	0.719919	0.607339	0.494172	-0.0308777	0.897	0.947	0.219876	0.303	0.438	-0.271	0.151	0.26	-0.223166	0.303	0.659	-0.311	0.144	0.291	0.0534151	0.77762	0.891314	1.905	1.791	1.465	1.974	1.362	1.324	1.419	1.57	0.959	1.308	0.891	1.23	1.126	0.973	1.633	1.536	1.125	1.153	2.383	2.111
	1110008P14Rik	1110008P14Rik|C79326|-|2|2 B|protein-coding	NM_198001	54.0527	50.6028	70.1592	116.473	0.755179	0.345761	0.300019	0.390374	-0.0676532	0.824	0.902	-0.663159	0.0179	0.0418	1.33	0.00464	0.0144	0.493561	0.0699	0.312	1.25	0.00586	0.0277	-0.629561	0.115421	0.318738	41.438	61.023	59.697	37.82	31.455	45.116	88.02	54.102	52.349	43.813	102.136	98.396	43.375	238.224	161.916	72.124	94.395	88.805	71.576	146.352
	1110012L19Rik	1110012L19Rik|-|-|X|X A7.2|protein-coding	NM_026787	18.6113	13.0785	11.509	12.636	1.46477	1.46374	1.83498	1.67431	0.304623	0.121	0.266	0.375212	0.0224	0.0508	-0.355	0.178	0.296	-0.0571449	0.73	0.914	-0.045	0.853	0.919	-0.0112484	0.957858	0.983941	16.881	20.288	18.665	14.58	11.152	12.561	14.021	13.359	10.325	9.974	11.944	11.943	10.41	17.496	14.315	12.122	11.156	10.317	12.706	8.935
	1110015O18Rik	1110015O18Rik|-|-|3|3 A1|ncRNA	NR_045272	2.854	0.82075	0.316	0.0926667	0.382522	0.413268	1.63731	0.936027	1.41638	3.29e-05	0.000396	2.60355	1.19e-08	9.24e-08	-4.72	6.51e-29	3.95e-27	-0.740013	0.0289	0.182	-3.14	5.83e-10	2.17e-08	1.89195	0.00465459	0.0379306	3.135	3.5	1.927	0.749	0.575	0.482	1.477	0.319	0.662	0.247	0.039	0.313	0.122	0	0.084	0.121	0.14	0.089	7.461	1.986
	1110017D15Rik	1110017D15Rik|Cbe1|Smrp1|-|4|4 A5|protein-coding	NM_001253780	4.49667	3.2575	1.8746	3.12433	0.996381	1.38617	1.53029	1.30999	0.193955	0.611	0.765	0.715359	0.126	0.219	-0.292	0.557	0.682	-0.332212	0.325	0.68	-0.0741	0.885	0.938	-0.481222	0.371624	0.613645	4.645	3.619	5.226	1.534	1.753	4.594	5.149	4.87	0.886	1.057	1.424	1.136	3.736	7.307	1.957	1.985	1.632	2.129	4.513	2.35
	1110019D14Rik	1110019D14Rik|-|-|6|6 A1|ncRNA	NR_045995	1.021	0.9345	1.0846	0.726167	1.23608	1.37023	1.52976	0.946762	-0.0733679	0.808	0.892	-0.357339	0.231	0.356	-0.302	0.479	0.612	0.248631	0.3	0.656	-0.387	0.301	0.479	0.703657	0.0438952	0.172426	0.83	1.337	0.896	1.091	0.984	0.898	0.765	1.436	1.14	0.954	0.797	1.096	0.388	1.112	0.407	0.845	0.692	0.913	0.826	0.682
	1110020A21Rik	1110020A21Rik|2600015P10Rik|-|17|17 E4|ncRNA	NR_027930	0.627667	0.8525	1.0412	0.97	1.56917	2.04436	3.33718	1.518	-0.527417	0.218	0.398	-0.960028	0.0208	0.0477	0.861	0.0789	0.154	0.292746	0.301	0.656	0.192	0.626	0.766	0.18902	0.573488	0.76535	0.337	1.086	0.46	0.776	1.37	0.56	0.704	1.032	1.001	0.944	0.945	1.284	1.408	1.11	0.976	1.013	0.671	0.642	0.4	0.417
	1110025L11Rik	1110025L11Rik|-|-|16|16 C3.3|protein-coding	NM_001276278	0	0	0	0	#DIV/0!	#DIV/0!	#DIV/0!	#DIV/0!	NA	1	1	NA	1	1	NA	1	1	NA	1	1	NA	1	1	NA	1	1	0	0	0	0	0	0	0	0	0	0	0	0	0	0	0	0	0	0	0	0
	1110028F11Rik	1110028F11Rik|-|-|11|11 C|ncRNA	NR_045139	0.00233333	0.005	0	0.00216667	#DIV/0!	#DIV/0!	#DIV/0!	0.361111	-0.080283	0.777	1	-0.0715375	0.894	1	0.166	0.963	1	-0.0216425	0.873	1	-0.992	0.756	1	0.335438	0.915169	1	0.007	0	0	0	0	0	0.02	0	0	0	0	0	0	0	0	0	0.013	0	0	0
	1110028F18Rik	1110028F18Rik|-|-|8|8 D3|ncRNA	NR_045470	0	0	0	0	#DIV/0!	#DIV/0!	#DIV/0!	#DIV/0!	NA	1	1	NA	1	1	NA	1	1	NA	1	1	NA	1	1	NA	1	1	0	0	0	0	0	0	0	0	0	0	0	0	0	0	0	0	0	0	0	0
	1110032A03Rik	1110032A03Rik|4930500N06Rik|c11orf1|-|9|9 A5.3|protein-coding	NM_023483	14.8813	16.0048	11.346	12.4948	1.38277	1.08573	0.620746	0.475143	-0.289244	0.188	0.361	0.0681867	0.71	0.805	-0.019	0.957	0.973	-0.338848	0.0784	0.334	-0.328	0.313	0.491	-0.0436837	0.877781	0.944471	13.591	17.294	13.759	18.978	16.404	11.49	17.147	9.946	8.365	11.06	13.211	14.148	11.742	21.025	14.164	8.741	9.822	9.475	10.762	14.741
	1110032F04Rik	1110032F04Rik|AI115547|-|3|3 E1|protein-coding	NM_001167996	3.99767	1.669	1.5202	2.142	1.05591	0.290665	0.157452	0.225973	1.03484	3.14e-06	5.56e-05	1.08063	3.89e-06	2.1e-05	-0.753	0.00107	0.00397	-0.0165859	0.939	0.98	0.329	0.134	0.277	-0.346766	0.127838	0.337635	3.612	3.94	4.441	1.289	1.749	1.514	2.124	2.236	0.972	1.394	1.434	1.565	1.425	1.453	2.752	2.309	2.965	1.948	3.786	5.742
	1110034G24Rik	1110034G24Rik|-|-|2 F2|2|protein-coding	NM_028637	4.118	3.2295	3.6304	5.307	1.2333	0.770948	0.966303	1.00664	0.16857	0.581	0.742	-0.124652	0.613	0.726	0.561	0.154	0.264	0.26343	0.31	0.665	0.74	0.0598	0.158	-0.416561	0.211033	0.449179	3.673	3.973	4.708	2.212	2.068	3.31	5.328	3.928	3.923	2.304	4.224	3.773	1.967	8.894	5.98	4.475	5.45	5.076	3.339	4.189
	1110036E04Rik	1110036E04Rik|-|-|9|9 C|ncRNA	NR_040713	0	0	0	0	#DIV/0!	#DIV/0!	#DIV/0!	#DIV/0!	NA	1	1	NA	1	1	NA	1	1	NA	1	1	NA	1	1	NA	1	1	0	0	0	0	0	0	0	0	0	0	0	0	0	0	0	0	0	0	0	0
	1110037F02Rik	1110037F02Rik|4930422M05Rik|Kiaa1429|mKIAA1429|-|4|4 A1|protein-coding	NM_001347055	4.72767	4.1445	3.0406	3.35333	0.775282	0.774094	0.544715	0.64277	-0.0142019	0.952	0.977	0.293774	0.157	0.261	-0.343	0.291	0.426	-0.277026	0.199	0.548	-0.36	0.258	0.43	0.0485781	0.863607	0.937485	4.978	5.312	3.893	4.362	4.832	4.658	2.726	3.319	3.3	3.934	2.21	2.44	3.038	1.073	3.162	4.892	3.784	4.171	6.098	5.354
	1110038B12Rik	1110038B12Rik|0610009C20Rik|0910001G04Rik|-|17|17 B1|ncRNA	NR_027943	5.81533	4.95375	7.9884	10.2153	0.411268	0.655692	1.16704	1.10138	0.0511289	0.851	0.918	-0.742288	0.0122	0.0302	1.04	0.0228	0.0557	0.684075	0.00853	0.0817	1.08	0.00973	0.0407	-0.256823	0.515742	0.723643	4.963	5.993	6.49	4.612	3.489	4.922	6.792	5.375	6.965	5.051	10.916	11.635	5.284	21.206	13.055	6.574	7.183	7.99	14.14	7.555
	1110038F14Rik	1110038F14Rik|-|-|15|15 D3|protein-coding	NM_054099	19.172	13.647	10.8478	12.227	1.95473	1.4616	1.40698	1.12246	0.279576	0.231	0.415	0.491045	0.00251	0.00751	-0.436	0.141	0.245	-0.186718	0.327	0.682	-0.148	0.606	0.751	-0.0536778	0.818913	0.912427	17.793	18.74	20.983	15.479	10.267	11.46	17.382	10.344	8.882	10.623	11.992	12.398	10.559	18.496	13.812	9.851	10.389	10.255	9.808	9.337
	1110046J04Rik	1110046J04Rik|-|-|13|13 A3.3|ncRNA	NR_040707	0.734667	0.736	1.4162	1.83467	0.403663	0.235144	0.426566	0.335099	-0.112907	0.792	0.884	-1.07913	0.0207	0.0475	1.49	0.00142	0.00509	0.725973	0.0229	0.158	1.35	0.000758	0.00532	-0.277572	0.496343	0.709961	0.693	0.39	1.121	0.428	0.581	0.842	1.093	1.896	1.104	0.488	1.736	1.857	0.97	2.839	2.367	2.075	1.386	1.371	1.82	3.13
	1110051M20Rik	1110051M20Rik|AI586322|-|2|2 E1|protein-coding	NM_175123	41.3987	26.0393	29.3996	40.5483	1.03681	0.782547	0.93534	0.772541	0.460131	0.00338	0.0179	0.164573	0.176	0.287	0.164	0.355	0.492	0.295725	0.0197	0.143	0.63	0.000126	0.00121	-0.322143	0.0229996	0.113619	43.732	43.445	37.019	27.84	25.25	24.986	26.081	32.63	26.406	30.941	28.64	28.381	32.342	45.034	44.366	41.352	42.613	37.583	39.929	33.275
	1110058D11Rik	1110058D11Rik|-|-|17|17 E1.1|ncRNA	NR_130982	0	0.023	0.0732	0.0161667	#DIV/0!	0.69697	#DIV/0!	#DIV/0!	-0.142496	0.61	1	-1.28949	0.0753	0.142	1.66	0.638	1	0.284501	0.267	1	-0.268	0.909	1	2.34528	0.131002	1	0	0	0	0	0.027	0.065	0	0.147	0.08	0.049	0.09	0	0	0	0	0.046	0	0.051	0	0.033
	1110059E24Rik	1110059E24Rik|-|-|19|19 B|protein-coding	NM_025423	13.509	12.8987	12.378	12.3705	1.1876	1.3239	1.10242	0.739907	-0.122443	0.45	0.636	-0.18744	0.221	0.345	0.0754	0.758	0.841	0.0641198	0.663	0.887	-0.0555	0.8	0.888	0.128332	0.524725	0.730653	14.181	13.059	13.287	13.012	11.985	12.857	13.741	14.687	11.907	10.492	11.935	12.869	10.348	16.346	14.64	11.74	10.636	10.513	11.375	9.743
	1110059G10Rik	1110059G10Rik|-|-|9|9 F4|protein-coding	NM_025419	3.726	2.97325	2.781	2.44433	1.01998	0.889662	0.856219	0.704825	0.130283	0.423	0.613	0.102318	0.543	0.667	-0.411	0.0358	0.0811	0.0307683	0.841	0.952	-0.281	0.106	0.237	0.318353	0.0721149	0.238503	3.721	3.951	3.506	2.864	3.004	3.008	3.017	3.373	2.919	2.589	2.582	2.442	2.923	2.196	2.579	2.35	2.381	2.237	3.653	3.342
	1110065P20Rik	1110065P20Rik|C530005M16Rik|-|4|4 D2.2|protein-coding	NM_001347196	41.6057	50.5527	45.0014	48.2492	0.933218	0.990512	0.987306	0.849996	-0.411228	0.192	0.366	-0.4152	0.11	0.196	0.46	0.301	0.437	-0.0217374	0.936	0.979	-0.00264	0.995	0.998	-0.0204822	0.956	0.982975	32.846	42.327	49.644	42.211	26.484	46.945	86.571	39.418	36.782	28.452	62.535	57.82	33.217	106.013	43.851	30.931	39.497	35.986	44.583	51.037
	1190002N15Rik	1190002N15Rik|GoPro49|HASF|-|9|9 E3.3|protein-coding	NM_001033145	4.58467	4.164	4.6808	3.33817	0.585227	0.381563	0.280355	0.327368	-0.0512923	0.822	0.901	-0.358919	0.0718	0.137	-0.267	0.354	0.491	0.285922	0.157	0.486	-0.322	0.249	0.42	0.638361	0.0103449	0.0665237	5.175	4.892	3.687	3.071	5.825	3.855	3.905	5.492	4.427	5.96	3.804	3.721	4.532	1.686	2.755	3.802	3.101	4.153	7.834	10.913
	1190003K10Rik	1190003K10Rik|-|-|13|13 B3|protein-coding	NM_001195435	0	0	0	0	0	0	0	#DIV/0!	NA	1	1	NA	1	1	NA	1	1	NA	1	1	NA	1	1	NA	1	1	0	0	0	0	0	0	0	0	0	0	0	0	0	0	0	0	0	0	0.078	0.081
	1190005I06Rik	1190005I06Rik|-|-|8|8 E1|protein-coding	NM_197988	7.25933	16.5072	31.9888	40.5667	1.49584	4.71366	5.64674	4.43642	-1.28732	7.85e-08	2.26e-06	-2.36434	1.48e-17	2.99e-16	2.7	8.82e-13	1.39e-11	0.957529	2.48e-05	0.000892	1.34	3.91e-05	0.000445	-0.243147	0.448198	0.675471	5.849	6.731	9.198	15.148	15.426	14.521	20.934	31.906	27.574	17.949	43.966	38.549	29.341	73.304	36.708	29.406	39.15	35.491	4.853	3.502
	1190007I07Rik	1190007I07Rik|-|-|10|10 C1|protein-coding	NM_001135569	5.37267	5.16925	4.6898	4.742	1.16746	1.23253	0.874799	1.09642	-0.12804	0.599	0.756	-0.179379	0.443	0.575	0.12	0.667	0.77	0.0444154	0.833	0.949	-0.0207	0.935	0.964	0.0723781	0.762801	0.883156	5.643	4.647	5.828	5.317	4.428	4.606	6.326	3.869	3.646	4.815	4.721	6.398	3.913	6.333	4.655	4.884	4.178	4.489	4.602	4.194
	1300002E11Rik	1300002E11Rik|1500026P21Rik|-|16|16 B1|ncRNA	NR_037958	7.13033	4.44875	3.4384	3.65167	1.38024	1.50499	0.910352	0.790575	-0.00875564	0.974	0.987	-0.263888	0.27	0.403	-0.0405	0.853	0.905	0.236147	0.307	0.662	-0.0562	0.811	0.895	0.317852	0.130916	0.342363	5.81	8.854	6.727	5.443	4.569	2.666	5.117	2.669	4.005	2.831	2.901	4.786	3.936	5.298	4.07	2.475	2.805	3.326	5.166	2.956
	1300017J02Rik	1300017J02Rik|Ica|mICA|-|9|9 F1|protein-coding	NM_027918	0.0116667	0.01975	0.0184	0.0211667	0.614035	0.681034	#DIV/0!	1.05833	-0.237816	0.622	1	-0.326084	0.66	0.764	1.11	0.502	0.634	-0.01034	0.968	1	0.243	0.859	0.923	-0.292134	0.839898	1	0.017	0	0.018	0.009	0.032	0.038	0	0	0.024	0.007	0	0.061	0.066	0	0	0.014	0.032	0.015	0.019	0.029
	1500004A13Rik	1500004A13Rik|5430404N14Rik|BB132176|-|3|3 F1|ncRNA	NR_015498	1.24967	0.77325	0.793	1.019	0.320756	0.341995	0.360291	0.713585	0.482663	0.0882	0.212	0.291558	0.308	0.443	-0.138	0.601	0.721	0.172736	0.516	0.815	0.381	0.174	0.332	-0.164456	0.547936	0.747038	1.474	1.037	1.238	0.482	0.658	0.812	1.141	0.431	0.602	0.782	1.19	0.96	0.511	0.917	1.313	1.138	0.983	1.252	3.896	2.261
	1500009C09Rik	1500009C09Rik|-|-|15|15 E1|ncRNA	NR_037698	102.678	131.031	152.733	164.825	2.36928	2.3846	2.7589	2.0411	-0.513329	0.0238	0.0812	-0.874497	3.09e-05	0.000139	0.932	0.0238	0.0578	0.321752	0.106	0.397	0.385	0.303	0.481	-0.0288644	0.930919	0.971073	82.162	114.107	111.764	147.97	103.248	115.327	157.581	141.92	136.892	114.99	201.141	168.721	139.244	337.074	146.381	120.07	125.287	120.892	43.337	54.949
	1500009L16Rik	1500009L16Rik|2700050C19Rik|OCC-1|-|10|10 C1|protein-coding	NM_001145198	9.46867	2.867	1.3012	1.55533	0.43106	0.21215	0.222923	0.182937	1.38873	2.16e-05	0.000282	2.44457	3.95e-15	6.36e-14	-2.37	3.79e-08	3.26e-07	-0.720639	0.0198	0.144	-0.823	0.0759	0.187	-0.178485	0.682722	0.835975	10.385	9.387	8.634	1.932	1.891	2.046	5.599	0.987	0.718	0.774	1.782	2.245	0.994	3.282	1.369	0.935	1.083	1.669	21.966	13.514
	1500011B03Rik	1500011B03Rik|AI415201|AV141149|AW556386|-|5|5 F|ncRNA	NR_027817	27.2953	22.5675	20.6558	27.979	0.516937	0.336472	0.356368	0.35584	0.0936139	0.686	0.818	0.081903	0.615	0.728	0.23	0.48	0.613	0.0168864	0.933	0.979	0.325	0.306	0.484	-0.304703	0.253267	0.496585	26.915	27.371	27.6	15.754	21.133	20.116	33.267	21.19	17.122	17.221	23.891	23.855	13.826	41.542	37.244	22.101	28.569	24.592	52.802	67.071
	1500011K16Rik	1500011K16Rik|-|-|2|2 F1|ncRNA	NR_015476	15.834	20.5922	22.4844	23.2102	1.05963	1.05396	0.847061	0.710008	-0.536814	0.0239	0.0816	-0.811689	8.82e-05	0.000362	0.765	0.0303	0.0707	0.23432	0.266	0.623	0.192	0.561	0.717	0.0721039	0.804511	0.905801	13.62	17.481	16.401	21.623	14.569	19.333	26.844	18.698	23.036	16.76	27.088	26.84	16.291	38.682	30.592	16.334	19.136	18.226	14.943	19.538
	1500012K07Rik	1500012K07Rik|-|-|7|7 D1|ncRNA	NR_045812	0.548	0.25425	0.2142	0.427333	0.289947	0.129126	0.100469	0.204956	0.613675	0.227	0.41	0.793192	0.177	0.289	-0.175	0.781	0.857	-0.020454	0.952	0.984	0.739	0.319	0.496	-0.790812	0.251252	0.493898	0.565	0.672	0.407	0.032	0.413	0.214	0.358	0.161	0.263	0.324	0.098	0.225	0.462	0	0.789	0.456	0.352	0.505	1.89	1.969
	1500015A07Rik	1500015A07Rik|-|-|18|18 E1|ncRNA	NR_029432	0.295333	0.3115	0.4188	0.639833	0.208422	0.415333	0.395467	0.394715	-0.173729	0.717	0.839	-0.736548	0.146	0.247	1.36	0.0129	0.0344	0.331175	0.333	0.687	1.12	0.0468	0.132	-0.509368	0.308312	0.556768	0.492	0.173	0.221	0.063	0.299	0.256	0.628	0.157	0.2	0.264	0.703	0.77	0.422	1.359	0.684	0.397	0.574	0.403	1.417	0.75
	1500015L24Rik	1500015L24Rik|-|-|19|19 B|ncRNA	NR_045817	0	0.00875	0.0702	0.328167	#DIV/0!	#DIV/0!	0.923684	0.702712	-0.0897196	0.748	1	-1.00415	0.147	0.248	6.3	2.42e-06	1.57e-05	0.237312	0.268	1	5.07	1.35e-05	0.000178	-2.67385	0.00349575	0.0312788	0	0	0	0	0	0	0.035	0.126	0.137	0	0	0.088	0.435	0.439	0.31	0.199	0.322	0.264	0	0
	1500015O10Rik	1500015O10Rik|Ecrg4|-|1|1 C1.1|protein-coding	NM_024283	2.08467	0.95075	1.998	2.2125	0.863931	0.700626	1.04937	2.35122	0.844724	0.0287	0.0932	-0.192785	0.582	0.7	0.264	0.42	0.556	0.87584	0.00421	0.0491	1.26	0.000589	0.00432	-0.0548475	0.857568	0.934258	2.295	1.413	2.546	0.55	0.508	1.572	1.173	2.877	1.57	1.041	2.025	2.477	2.016	2.314	2.909	2.654	1.254	2.128	2.413	1.357
	1500017E21Rik	1500017E21Rik|-|-|19 C2|19|ncRNA	NR_033510	1.851	1.7765	1.1566	0.812333	0.418589	0.351922	0.215101	0.700892	-0.130498	0.566	0.731	0.34407	0.14	0.238	-0.999	0.000245	0.00108	-0.438549	0.0325	0.196	-1.14	4.14e-06	6.35e-05	0.650288	0.00829026	0.0569579	2.17	1.933	1.45	1.527	2.046	2.038	1.495	1.139	0.962	1.425	0.818	1.439	0.902	0.541	0.66	0.904	0.698	1.169	4.422	5.048
	1500026H17Rik	1500026H17Rik|-|-|10|10 C2|ncRNA	NR_130956	0.34	0.298	0.4102	0.474	0.310502	0.403794	0.659486	0.738318	0.0045527	0.99	0.995	-0.528487	0.133	0.229	0.698	0.201	0.323	0.464141	0.0709	0.315	0.699	0.137	0.282	-0.113753	0.793587	0.899677	0.208	0.411	0.401	0.282	0.29	0.243	0.377	0.418	0.386	0.287	0.442	0.518	0.191	1.072	0.548	0.366	0.318	0.349	1.095	0.738
	1600002D24Rik	1600002D24Rik|-|-|16|16 C4|ncRNA	NR_040485	0	0	0	0	#DIV/0!	0	#DIV/0!	0	NA	1	1	NA	1	1	NA	1	1	NA	1	1	NA	1	1	NA	1	1	0	0	0	0	0	0	0	0	0	0	0	0	0	0	0	0	0	0	0	0.012
	1600002H07Rik	1600002H07Rik|-|-|17|17 A3.3|protein-coding	NM_028056	2.669	1.721	1.3596	1.9075	0.890854	0.66991	0.607235	0.613344	0.436084	0.0538	0.149	0.665619	0.00524	0.0144	-0.313	0.219	0.345	-0.196178	0.374	0.723	0.14	0.562	0.717	-0.36157	0.140404	0.355546	2.93	2.36	2.717	1.339	1.532	1.931	2.082	1.328	0.949	1.162	1.244	2.115	1.204	2.093	2.442	1.677	2.427	1.602	2.996	2.569
	1600002K03Rik	1600002K03Rik|-|-|10|10 C1|protein-coding	NM_027207	1.60067	1.50425	2.3966	3.18333	0.783488	0.913327	0.87595	1.37628	-0.0755586	0.825	0.903	-0.829689	0.0169	0.0399	1.18	0.00606	0.0181	0.6342	0.0212	0.15	1.09	0.00498	0.0243	-0.288054	0.430908	0.662016	1.33	1.431	2.041	1.653	1.027	1.61	1.727	2.266	2.39	1.371	2.996	2.96	1.42	5.558	3.257	2.67	2.761	3.434	2.043	1.647
	1600010M07Rik	1600010M07Rik|-|-|7|7 E3|ncRNA	NR_037959	0.0223333	0.011	0.0222	0.067	0.160671	0.305556	0.0925	0.683673	0.0548737	0.845	1	-0.0285217	0.959	1	1.72	0.44	0.576	0.0314126	0.817	1	2.42	0.245	0.416	-1.52782	0.451618	1	0	0	0.067	0	0	0	0.044	0	0	0	0	0.111	0	0.185	0	0.05	0	0.167	0.139	0.036
	1600012H06Rik	1600012H06Rik|-|-|17|17 A2|protein-coding	NM_026451	8.70167	8.2975	5.735	4.39983	0.742146	0.938525	0.84963	0.882969	-0.115275	0.481	0.663	0.296605	0.0496	0.101	-0.776	0.00137	0.00494	-0.393783	0.00723	0.072	-0.898	4.33e-05	0.000487	0.490276	0.0150864	0.0856978	9.11	8.408	8.587	8.797	8.185	8.06	8.148	7.013	5.25	5.23	4.885	6.297	5.949	3.244	4.303	4.857	3.304	4.742	11.725	8.841
	1600014C10Rik	1600014C10Rik|AI428873|-|7|7 B3|protein-coding	NM_028166	4.75033	4.64725	4.793	6.36483	0.688255	0.514076	0.543362	0.491493	-0.150987	0.455	0.641	-0.331578	0.0179	0.0419	0.612	0.00176	0.00618	0.16889	0.3	0.656	0.45	0.0227	0.0775	-0.268071	0.0859109	0.265856	4.617	5.217	4.417	4.515	4.263	3.768	6.043	4.85	4.376	4.424	5.094	5.221	4.908	7.212	6.897	6.045	7.125	6.002	6.902	9.04
	1600014C23Rik	1600014C23Rik|-|-|17|17 B3|protein-coding	NM_028164	0.581667	0.94225	0.919	0.888667	7.00803	5.44653	5.34302	4.31392	-0.714493	0.0984	0.23	-0.778315	0.124	0.215	0.793	0.221	0.348	-0.0018367	0.996	0.998	-0.113	0.843	0.913	0.139774	0.807286	0.907612	0.52	0.544	0.681	1.284	0.593	0.674	1.218	1.139	1.347	0.351	0.695	1.063	0.182	1.838	1.149	0.539	0.694	0.93	0.083	0.173
	1600015I10Rik	1600015I10Rik|AI429442|Doxl1|-|6|6 B2.3|protein-coding	NM_001081273	0	0.00175	0	0	#DIV/0!	#DIV/0!	0	#DIV/0!	-0.0897196	0.748	1	NA	1	1	NA	1	1	0.00913838	0.946	1	-0.583	0.857	1	NA	1	1	0	0	0	0	0.007	0	0	0	0	0	0	0	0	0	0	0	0	0	0	0
	1600019K03Rik	1600019K03Rik|-|-|16|16 B3|ncRNA	NR_040481	0	0	0	0	#DIV/0!	#DIV/0!	#DIV/0!	#DIV/0!	NA	1	1	NA	1	1	NA	1	1	NA	1	1	NA	1	1	NA	1	1	0	0	0	0	0	0	0	0	0	0	0	0	0	0	0	0	0	0	0	0
	1600020E01Rik	1600020E01Rik|-|-|6|6 D1|ncRNA	NR_037960	4.513	4.214	3.3024	4.30483	0.457291	0.581322	0.578556	0.692541	-0.0534085	0.885	0.939	0.166232	0.599	0.714	0.142	0.771	0.849	-0.168675	0.579	0.848	0.0732	0.882	0.936	-0.280513	0.508405	0.718626	3.634	5.057	4.848	2.183	2.452	4.123	8.098	3.039	3.224	1.787	4.327	4.135	2.105	9.089	5.524	2.185	3.147	3.779	9.869	7.249
	1600023N17Rik	1600023N17Rik|AV119442|-|5|5 B3|ncRNA	NR_073433	0.166333	0.109	0.1344	0.102	0.357706	0.707792	0.65561	0.34	0.181284	0.735	0.85	0.028789	0.969	0.981	-0.594	0.658	0.764	0.0954825	0.776	0.927	-0.206	0.819	0.899	0.5247	0.586065	0.774002	0.417	0	0.082	0.135	0.107	0.086	0.108	0.097	0.212	0.033	0.059	0.271	0	0	0.22	0.184	0.106	0.102	0.465	0.154
	1600025M17Rik	1600025M17Rik|Gm394|-|X|X A6|ncRNA	NR_038168	0	0	0	0	#DIV/0!	#DIV/0!	#DIV/0!	#DIV/0!	NA	1	1	NA	1	1	NA	1	1	NA	1	1	NA	1	1	NA	1	1	0	0	0	0	0	0	0	0	0	0	0	0	0	0	0	0	0	0	0	0
	1600027J07Rik	1600027J07Rik|-|-|8|8 D2|ncRNA	NR_036588	0	0	0	0	#DIV/0!	#DIV/0!	#DIV/0!	0	NA	1	1	NA	1	1	NA	1	1	NA	1	1	NA	1	1	NA	1	1	0	0	0	0	0	0	0	0	0	0	0	0	0	0	0	0	0	0	0	0
	1600029I14Rik	1600029I14Rik|-|-|9|9 E3.3|ncRNA	NR_028123	0.217667	0.24575	0.1624	0.341167	#DIV/0!	3.19156	#DIV/0!	#DIV/0!	-0.141044	0.792	0.884	0.18437	0.807	0.876	0.866	0.432	0.569	-0.202898	0.517	0.815	0.602	0.454	0.628	-1.27108	0.229588	0.468624	0.199	0	0.454	0.113	0.146	0.503	0.221	0.679	0	0.019	0.035	0.079	0.76	0.351	0.107	0.393	0	0.436	0	0.077
	1600029O15Rik	1600029O15Rik|-|-|9|9 B|pseudo	NR_033522	0.291667	0.042	0.0538	0.0943333	0.156642	0.0976744	0.156851	0.256341	1.66923	0.00106	0.00701	1.58904	0.0166	0.0393	-1.44	0.0167	0.0429	0.117744	0.697	0.902	1.14	0.125	0.264	-0.705112	0.389977	0.630033	0.476	0.262	0.137	0.011	0.079	0.048	0.03	0	0	0.064	0.016	0.189	0.083	0.021	0.112	0.136	0.138	0.076	1.862	0.43
	1700001C02Rik	1700001C02Rik|1700047H18Rik|-|5|5 B1|protein-coding	NM_029285	0.759	1.11875	0.6136	1.072	4.19337	11.9016	14.6095	7.14667	-0.266426	0.61	0.765	0.0211043	0.978	0.987	0.681	0.641	0.752	-0.343553	0.313	0.669	-0.00602	0.993	0.997	-0.773513	0.372034	0.614132	0.73	0	1.547	0.468	1.22	2.209	0.578	2.074	0	0.464	0.337	0.193	2.174	0.749	0.706	1.353	0	1.45	0.181	0.094
	1700001C19Rik	1700001C19Rik|-|-|17|17 C|protein-coding	NM_001347584	0	0.00875	0.0086	0.016	0	0.0550314	0.358333	0.444444	-0.0897196	0.748	1	-0.296912	0.579	1	2.51	0.333	1	0.0314126	0.817	1	1.28	0.527	1	-0.38322	0.84711	1	0	0	0	0	0	0.035	0	0	0.043	0	0	0	0	0	0.015	0.025	0.029	0.027	0.068	0.159
	1700001D01Rik	1700001D01Rik|-|-|8|8 B3.1|ncRNA	NR_045475	0	0.00875	0	0	#DIV/0!	#DIV/0!	#DIV/0!	#DIV/0!	-0.0897196	0.748	1	NA	1	1	NA	1	1	0.00913838	0.946	1	-0.583	0.857	1	NA	1	1	0	0	0	0.035	0	0	0	0	0	0	0	0	0	0	0	0	0	0	0	0
	1700001F09Rik	1700001F09Rik|Gm10377|-|14|14 B|protein-coding	NM_027940	0	0	0	0	#DIV/0!	#DIV/0!	#DIV/0!	#DIV/0!	NA	1	1	NA	1	1	NA	1	1	NA	1	1	NA	1	1	NA	1	1	0	0	0	0	0	0	0	0	0	0	0	0	0	0	0	0	0	0	0	0
	1700001G01Rik	1700001G01Rik|-|-|18|18 A1|ncRNA	NR_130158	0	0	0	0	#DIV/0!	#DIV/0!	#DIV/0!	#DIV/0!	NA	1	1	NA	1	1	NA	1	1	NA	1	1	NA	1	1	NA	1	1	0	0	0	0	0	0	0	0	0	0	0	0	0	0	0	0	0	0	0	0
	1700001G11Rik	1700001G11Rik|-|-|14|14 D1|ncRNA	NR_038077	0.210667	0.146	0.3168	0.3175	0.757794	0.561538	1.1777	1.07264	0.196414	0.714	0.837	-0.581472	0.406	0.54	0.756	0.299	0.434	0.422173	0.199	0.548	1.12	0.0826	0.198	0.0858504	0.901827	0.957865	0.05	0.421	0.161	0.025	0.211	0.17	0.178	0	0.487	0.128	0.078	0.891	0.122	0.345	0.41	0.483	0.233	0.312	0.278	0.26
	1700001G17Rik	1700001G17Rik|-|-|1|1 B|ncRNA	NR_033199	0.122	0.069	0.0764	0.2435	0.363095	0.345	0.255518	1.30214	0.284947	0.594	0.753	0.418807	0.576	0.695	1.17	0.0969	0.182	-0.00938621	0.972	0.99	1.76	0.0254	0.0844	-2.11833	0.0258435	0.122401	0.129	0.121	0.116	0.022	0.101	0	0.153	0.33	0	0.018	0.034	0	0.126	0.426	0.333	0.104	0.241	0.231	0.336	0.2
	1700001J03Rik	1700001J03Rik|-|-|5|5 G3|protein-coding	NM_001008547	0	0	0	0.0406667	#DIV/0!	#DIV/0!	0	#DIV/0!	NA	1	1	NA	1	1	3.39	0.272	0.405	NA	1	1	2.88	0.313	1	-1.92898	0.509103	1	0	0	0	0	0	0	0	0	0	0	0	0	0	0.196	0.048	0	0	0	0	0
	1700001J11Rik	1700001J11Rik|-|-|9|9 A5.1|pseudo	NR_033613	0	0.00725	0.007	0.00933333	0	0.402778	#DIV/0!	1.55556	-0.150709	0.599	1	-0.419971	0.441	1	2.72	0.343	1	0.0506671	0.795	1	0.622	0.747	1	0.12856	0.944437	1	0	0	0	0	0	0.018	0.011	0	0.022	0.013	0	0	0	0	0.015	0.012	0.029	0	0.035	0.018
	1700001K19Rik	1700001K19Rik|-|-|12|12 F1|protein-coding	NM_025488	0.274333	0.21075	0.1144	0.222667	0.40642	0.562	0.262385	2.78333	0.16272	0.749	0.859	0.616715	0.358	0.494	-0.163	0.817	0.881	-0.243712	0.472	0.786	0.0847	0.893	0.942	-0.66096	0.363248	0.606105	0.384	0.091	0.348	0.062	0.247	0.275	0.259	0	0.281	0.156	0.063	0.072	0.059	0.28	0.273	0.391	0.189	0.144	0.675	0.375
	1700001K23Rik	1700001K23Rik|-|-|19|19 D2|ncRNA	NR_036590	0.329	0.339	0.3794	0.122167	0.937322	1.23723	#DIV/0!	0.985215	-0.182825	0.72	0.84	-0.506454	0.42	0.553	-1.18	0.259	0.391	0.203181	0.554	0.835	-1.44	0.0815	0.197	1.80058	0.0357135	0.15143	0.551	0.266	0.17	0.4	0.407	0.268	0.281	0	0.329	0.575	0.43	0.563	0.193	0	0.152	0.318	0	0.07	0.351	0.274
	1700001L05Rik	1700001L05Rik|-|-|15|15 E1|ncRNA	NR_027980	0.169333	0.305	0.3306	0.391	0.271368	0.226766	0.181948	0.317113	-0.89834	0.00889	0.0378	-1.25713	1.31e-05	6.36e-05	1.37	0.000378	0.00158	0.239165	0.36	0.712	0.352	0.34	0.518	-0.0630174	0.840242	0.924778	0.204	0.129	0.175	0.155	0.32	0.282	0.463	0.309	0.408	0.366	0.308	0.262	0.303	0.34	0.714	0.267	0.511	0.211	0.624	1.345
	1700001L19Rik	1700001L19Rik|-|-|13|13 B3|protein-coding	NM_027035	7.66267	2.268	1.535	3.8685	0.57753	0.200726	0.205599	0.352998	1.39298	8.17e-05	0.000857	1.96634	3.68e-22	1.09e-20	-0.774	0.0447	0.097	-0.300665	0.308	0.663	0.813	0.0674	0.172	-1.20512	0.000394496	0.0065021	8.558	7.665	6.765	0.84	2.368	1.562	4.302	1.949	1.742	1.482	1.404	1.098	1.931	6.624	5.446	2.631	3.739	2.84	13.268	11.299
	1700001O22Rik	1700001O22Rik|1700113K14Rik|4930549G18Rik|-|2|2 B|protein-coding	NR_028487	0.461	0.28975	0.3796	0.893333	2.05804	0.689881	0.185533	0.358049	0.327761	0.498	0.677	-0.505649	0.41	0.544	1.34	0.012	0.0324	0.495625	0.148	0.473	1.79	0.000438	0.00339	-0.699064	0.236321	0.476678	0.724	0.204	0.455	0.102	0.227	0.228	0.602	0.103	0	0.242	0.69	0.863	0.315	1.034	1.399	0.616	1.277	0.719	0.224	0.42
	1700001P01Rik	1700001P01Rik|-|-|11|11 D|protein-coding	NM_028156	0.0223333	0.17325	0.2544	0.159333	0.0540759	1.21154	5.3	3.2517	-1.07105	0.0418	0.124	-2.20595	0.00251	0.00751	3.05	0.0351	0.0799	0.333876	0.328	0.682	-0.178	0.827	0.904	0.926957	0.227831	0.467178	0	0	0.067	0.157	0.29	0.07	0.176	0.158	0.258	0.265	0.481	0.11	0.121	0.427	0.089	0.149	0.115	0.055	0.413	0.143
	1700003C15Rik	1700003C15Rik|-|-|5 A1|5|ncRNA	NR_045478	0	0	0	0	#DIV/0!	#DIV/0!	#DIV/0!	#DIV/0!	NA	1	1	NA	1	1	NA	1	1	NA	1	1	NA	1	1	NA	1	1	0	0	0	0	0	0	0	0	0	0	0	0	0	0	0	0	0	0	0	0
	1700003D09Rik	1700003D09Rik|-|-|11|11 D|ncRNA	NR_045477	0.884667	2.03	6.9176	19.2162	1.25307	1.01551	1.07416	2.18639	-1.17189	0.00263	0.0145	-3.17308	9.43e-28	4.27e-26	4.66	1.28e-54	3.2e-52	1.41988	2.01e-06	0.000104	3.27	1.02e-17	1.34e-15	-1.35955	8.54e-07	5.79e-05	1.075	0.791	0.788	1.317	4.323	1.125	1.355	3.873	4.572	10.008	8.056	8.079	24.191	23.178	19.84	14.623	17.064	16.401	0.706	1.999
	1700003E16Rik	1700003E16Rik|AU041756|-|6|6 C3|protein-coding	NM_027948	6.813	5.07925	3.8784	6.376	0.71746	0.379218	0.348151	0.455364	0.227031	0.543	0.713	0.471663	0.163	0.269	0.102	0.76	0.842	-0.160642	0.616	0.862	0.364	0.399	0.577	-0.596662	0.102064	0.296113	6.988	6.667	6.784	2.004	3.712	3.497	11.104	1.958	2.214	2.623	6.016	6.581	2.967	9.689	7.44	4.988	6.509	6.663	9.496	13.394
	1700003E24Rik	1700003E24Rik|ENSMUSG00000067646|Gm14779|OTTMUSG00000017966|-|X|X C3|pseudo	NR_103799	0	0	0	0	#DIV/0!	#DIV/0!	#DIV/0!	#DIV/0!	NA	1	1	NA	1	1	NA	1	1	NA	1	1	NA	1	1	NA	1	1	0	0	0	0	0	0	0	0	0	0	0	0	0	0	0	0	0	0	0	0
	1700003F12Rik	1700003F12Rik|-|-|2|2 H1|protein-coding	NM_029305	0.702333	0.98025	1.1542	1.69283	1.20057	3.57755	3.17088	3.26802	-0.539933	0.158	0.321	-0.964953	0.0192	0.0444	1.44	0.000328	0.00139	0.31433	0.289	0.646	0.803	0.0209	0.0729	-0.383623	0.278261	0.525088	0.551	0.65	0.906	0.693	0.789	1.131	1.308	0.938	1.317	0.766	1.718	1.032	1.029	2.388	1.521	1.396	1.666	2.157	0.585	0.274
	1700003G13Rik	1700003G13Rik|-|-|9|9 A5.2|ncRNA	NR_040720	0	0	0	0	#DIV/0!	#DIV/0!	#DIV/0!	#DIV/0!	NA	1	1	NA	1	1	NA	1	1	NA	1	1	NA	1	1	NA	1	1	0	0	0	0	0	0	0	0	0	0	0	0	0	0	0	0	0	0	0	0
	1700003G18Rik	1700003G18Rik|2610312K03Rik|-|7|7 F1|ncRNA	NR_029433	0	0.0365	0.0222	0	#DIV/0!	0.253472	#DIV/0!	#DIV/0!	-0.261925	0.402	1	-0.296912	0.579	1	NA	1	1	-0.0418879	0.81	1	-2.1	0.506	1	1.51548	0.6292	1	0	0	0	0	0.058	0	0.088	0	0	0	0	0.111	0	0	0	0	0	0	0	0.144
	1700003H04Rik	1700003H04Rik|4930538K10Rik|4933400D22Rik|-|3|3 G1|ncRNA	NR_015460	0	0	0	0	#DIV/0!	#DIV/0!	#DIV/0!	#DIV/0!	NA	1	1	NA	1	1	NA	1	1	NA	1	1	NA	1	1	NA	1	1	0	0	0	0	0	0	0	0	0	0	0	0	0	0	0	0	0	0	0	0
	1700003I22Rik	1700003I22Rik|-|-|1|1 C1.3|ncRNA	NR_126076	0	0	0	0	#DIV/0!	#DIV/0!	#DIV/0!	#DIV/0!	NA	1	1	NA	1	1	NA	1	1	NA	1	1	NA	1	1	NA	1	1	0	0	0	0	0	0	0	0	0	0	0	0	0	0	0	0	0	0	0	0
	1700003L19Rik	1700003L19Rik|-|-|16|16 A1|ncRNA	NR_040507	0.0256667	0	0	0	0.450292	#DIV/0!	0	#DIV/0!	0.154036	0.582	1	0.126554	0.815	1	-1.65	0.631	1	NA	1	1	NA	1	1	NA	1	1	0.077	0	0	0	0	0	0	0	0	0	0	0	0	0	0	0	0	0	0.057	0
	1700003M07Rik	1700003M07Rik|-|-|4|4 D2.2|ncRNA	NR_040648	6.189	8.00725	12.2232	12.0112	2.08524	2.4316	2.37344	2.02652	-0.520385	0.00636	0.0292	-1.26784	4.22e-17	8.24e-16	1.12	2.4e-08	2.13e-07	0.701716	1.18e-05	0.000484	0.581	0.0028	0.0155	0.163326	0.32816	0.575085	7.083	5.81	5.674	8.987	8.747	7.268	7.027	9.715	11.596	12.419	12.412	14.974	13.924	12.012	12.478	10.989	10.833	11.831	2.968	3.293
	1700003P14Rik	1700003P14Rik|1700030O10Rik|4930584L06Rik|-|13|13 D2.3|ncRNA	NR_045982	0	0	0	0	#DIV/0!	#DIV/0!	#DIV/0!	#DIV/0!	NA	1	1	NA	1	1	NA	1	1	NA	1	1	NA	1	1	NA	1	1	0	0	0	0	0	0	0	0	0	0	0	0	0	0	0	0	0	0	0	0
	1700006A11Rik	1700006A11Rik|-|-|3|3 G1|protein-coding	NM_027939	0	0	0	0	#DIV/0!	#DIV/0!	#DIV/0!	#DIV/0!	NA	1	1	NA	1	1	NA	1	1	NA	1	1	NA	1	1	NA	1	1	0	0	0	0	0	0	0	0	0	0	0	0	0	0	0	0	0	0	0	0
	1700006E09Rik	1700006E09Rik|-|-|11|11 D|protein-coding	NM_029287	0	0	0	0	#DIV/0!	#DIV/0!	#DIV/0!	#DIV/0!	NA	1	1	NA	1	1	NA	1	1	NA	1	1	NA	1	1	NA	1	1	0	0	0	0	0	0	0	0	0	0	0	0	0	0	0	0	0	0	0	0
	1700006F04Rik	1700006F04Rik|-|-|14|14 E4|ncRNA	NR_045621	0	0	0	0	#DIV/0!	#DIV/0!	#DIV/0!	#DIV/0!	NA	1	1	NA	1	1	NA	1	1	NA	1	1	NA	1	1	NA	1	1	0	0	0	0	0	0	0	0	0	0	0	0	0	0	0	0	0	0	0	0
	1700006H21Rik	1700006H21Rik|-|-|13|13 D2.1|ncRNA	NR_045900	0	0.03325	0.0594	0	#DIV/0!	#DIV/0!	#DIV/0!	#DIV/0!	-0.233497	0.442	1	-0.852575	0.204	0.323	NA	1	1	0.0932047	0.687	1	-2.01	0.526	1	2.80215	0.236636	1	0	0	0	0.063	0	0.07	0	0.158	0.086	0.053	0	0	0	0	0	0	0	0	0	0
	1700007B14Rik	1700007B14Rik|-|-|8|8 C1|protein-coding	NM_027944	0	0.0135	0	0.0045	0	0.306818	0	#DIV/0!	-0.302196	0.361	1	NA	1	1	2.08	0.556	1	-0.0674075	0.624	1	-0.977	0.638	1	-0.614929	0.844558	1	0	0	0	0	0.027	0	0.027	0	0	0	0	0	0	0	0.009	0	0.018	0	0.021	0.044
	1700007F19Rik	1700007F19Rik|-|-|3|3 D|ncRNA	NR_040538	0	0.02575	0.0124	0.0411667	#DIV/0!	0.378676	0.688889	1.11261	-0.53771	0.187	1	-0.442907	0.425	1	4.34	0.00959	0.0269	-0.110411	0.642	1	0.674	0.527	0.689	-1.46293	0.240351	1	0	0	0	0	0.044	0.026	0.033	0	0	0.02	0	0.042	0.011	0.069	0.068	0.056	0.022	0.021	0	0.068
	1700007G11Rik	1700007G11Rik|4930428O21Rik|-|5|5 E3|protein-coding	NM_001024614	0.836333	0.863	0.4356	0.453333	0.931329	1.18544	1.57826	1.11384	-0.132227	0.775	0.873	0.573789	0.308	0.444	-0.652	0.274	0.408	-0.435415	0.205	0.555	-0.834	0.157	0.309	-0.0248015	0.968008	0.987488	0.873	0.428	1.208	0.159	0.862	1.219	1.212	1.03	0.125	0.654	0.209	0.16	0.966	0.354	0.346	0.325	0.209	0.52	0.898	0.728
	1700007J10Rik	1700007J10Rik|4930573L17Rik|-|11|11 B1.3|ncRNA	NR_045476	0.0173333	0.0375	0.0216	0.00516667	0.112554	0.267857	0.201869	0.191358	-0.334085	0.477	1	-0.201562	0.741	0.828	-1.17	0.733	1	-0.0508966	0.826	1	-2.57	0.143	1	2.15057	0.48311	1	0.052	0	0	0.07	0.016	0.039	0.025	0	0	0	0.108	0	0	0	0	0	0	0.031	0.154	0.14
	1700007K09Rik	1700007K09Rik|-|-|7|7 F3|protein-coding	NM_027037	0.00966667	0.0285	0	0.0135	0.0761155	0.215909	0	#DIV/0!	-0.210511	0.551	1	-0.0715375	0.894	1	0.612	0.86	1	-0.0521783	0.703	1	-1.12	0.623	1	-0.110734	0.971918	1	0.029	0	0	0.087	0.027	0	0	0	0	0	0	0	0	0	0.028	0	0.053	0	0.127	0.132
	1700007K13Rik	1700007K13Rik|Rbest47|-|2|2 A3|protein-coding	NM_027040	2.12567	4.77425	3.155	2.40517	1.3302	2.17803	2.44574	1.24814	-1.24201	9.37e-06	0.00014	-0.831367	0.00349	0.0101	0.379	0.355	0.492	-0.442818	0.0156	0.124	-0.968	0.00201	0.0118	0.494581	0.0956847	0.284441	1.984	1.479	2.914	4.617	4.288	5.151	5.041	3.542	2.532	3.119	2.907	3.675	3.022	2.98	2.656	2.313	0.982	2.478	1.598	2.192
	1700007L15Rik	1700007L15Rik|linc-Iqcg|linc1609|-|16|16 B3|ncRNA	NR_045709	0.120667	0.137	0.2588	0.151	2.11696	0.658654	1.30707	0.496711	-0.106138	0.841	0.912	-0.962074	0.149	0.25	0.369	0.763	0.844	0.422387	0.209	0.561	0.116	0.918	0.955	0.946539	0.252771	0.495854	0.026	0.087	0.249	0	0.096	0.233	0.219	0.393	0.214	0.132	0.28	0.275	0	0	0.272	0.207	0.335	0.092	0.057	0.208
	1700007P06Rik	1700007P06Rik|-|-|1|1 H5|ncRNA	NR_040554	0.025	0.00825	0.0186	0.0486667	0.0803859	0.0436508	0.0398287	0.203626	0.111324	0.714	1	-0.0819412	0.897	0.936	0.983	0.596	0.716	0.086859	0.587	1	2.28	0.204	1	-0.59784	0.70578	1	0	0	0.075	0	0	0	0.033	0	0	0.02	0.073	0	0	0	0.09	0.075	0.044	0.083	0.311	0.189
	1700008C04Rik	1700008C04Rik|-|-|12|12 B3|ncRNA	NR_126468	0	0	0	0	#DIV/0!	#DIV/0!	#DIV/0!	#DIV/0!	NA	1	1	NA	1	1	NA	1	1	NA	1	1	NA	1	1	NA	1	1	0	0	0	0	0	0	0	0	0	0	0	0	0	0	0	0	0	0	0	0
	1700008J07Rik	1700008J07Rik|AW048743|-|7|7 F3|ncRNA	NR_024331	1.14333	0.83925	1.1586	1.34983	1.00469	1.29714	1.2418	1.48824	0.228361	0.441	0.63	-0.323243	0.159	0.264	0.431	0.0964	0.181	0.506481	0.0254	0.169	0.676	0.0111	0.0449	-0.0916298	0.651904	0.81879	1.257	0.902	1.271	0.926	0.79	0.499	1.142	1.124	0.986	1.14	1.139	1.404	1.409	1.446	1.237	1.229	1.599	1.179	1.138	0.647
	1700008K24Rik	1700008K24Rik|-|-|17|17 C|ncRNA	NR_038145	0.113	0.0355	0	0.0248333	#DIV/0!	0.156388	0	0.282197	0.275882	0.556	0.723	0.691503	0.279	0.411	-2.1	0.306	0.441	-0.0802943	0.568	1	-1.02	0.628	1	-0.846839	0.786729	1	0.279	0	0.06	0.142	0	0	0	0	0	0	0	0	0	0	0	0.045	0.104	0	0	0.227
	1700008O03Rik	1700008O03Rik|-|-|7|7 B3|protein-coding	NM_027049	0.929333	1.44	1.516	1.97233	0.532875	0.548154	0.540463	0.608182	-0.679311	0.0832	0.203	-0.948076	0.0213	0.0487	1.28	0.00255	0.00851	0.158136	0.618	0.863	0.469	0.266	0.439	-0.241495	0.546472	0.745602	0.888	1.261	0.639	0.581	1.569	1.199	2.411	0.865	1.238	0.763	2.143	2.571	0.767	2.93	2.309	1.501	2.173	2.154	1.744	2.627
	1700008P02Rik	1700008P02Rik|-|-|3|3 A1|protein-coding	NM_027048	0	0	0	0	#DIV/0!	#DIV/0!	#DIV/0!	#DIV/0!	NA	1	1	NA	1	1	NA	1	1	NA	1	1	NA	1	1	NA	1	1	0	0	0	0	0	0	0	0	0	0	0	0	0	0	0	0	0	0	0	0
	1700009C05Rik	1700009C05Rik|-|-|6|6 C3|ncRNA	NR_046040	0.0603333	0.029	0	0	0.553517	1.03571	#DIV/0!	0	0.211767	0.64	1	0.433437	0.459	1	-3.05	0.347	1	-0.0562289	0.681	1	-2.1	0.506	1	NA	1	1	0.049	0	0.132	0	0.046	0	0.07	0	0	0	0	0	0	0	0	0	0	0	0.109	0.028
	1700009J07Rik	1700009J07Rik|4930535B06Rik|-|10|10 C1|ncRNA	NR_015547	0	0	0	0.0065	#DIV/0!	#DIV/0!	#DIV/0!	#DIV/0!	NA	1	1	NA	1	1	1.13	0.75	1	NA	1	1	0.619	0.848	1	0.335438	0.915169	1	0	0	0	0	0	0	0	0	0	0	0	0	0	0	0	0	0.039	0	0	0
	1700009N14Rik	1700009N14Rik|AI429145|-|4|4 A5|protein-coding	NM_001081095	0	0.0055	0	0	0	#DIV/0!	#DIV/0!	#DIV/0!	-0.0897196	0.748	1	NA	1	1	NA	1	1	0.00913838	0.946	1	-0.583	0.857	1	NA	1	1	0	0	0	0	0	0	0.022	0	0	0	0	0	0	0	0	0	0	0	0.034	0
	1700010B08Rik	1700010B08Rik|-|-|2|2 H4|protein-coding	NM_029308	0	0	0	0	0	#DIV/0!	#DIV/0!	#DIV/0!	NA	1	1	NA	1	1	NA	1	1	NA	1	1	NA	1	1	NA	1	1	0	0	0	0	0	0	0	0	0	0	0	0	0	0	0	0	0	0	0.048	0
	1700010D01Rik	1700010D01Rik|-|-|X|X C3|protein-coding	NM_029590	0	0	0	0	#DIV/0!	#DIV/0!	#DIV/0!	#DIV/0!	NA	1	1	NA	1	1	NA	1	1	NA	1	1	NA	1	1	NA	1	1	0	0	0	0	0	0	0	0	0	0	0	0	0	0	0	0	0	0	0	0
	1700010I02Rik	1700010I02Rik|-|-|3|3 A1|ncRNA	NR_040587	0	0	0	0	#DIV/0!	#DIV/0!	#DIV/0!	#DIV/0!	NA	1	1	NA	1	1	NA	1	1	NA	1	1	NA	1	1	NA	1	1	0	0	0	0	0	0	0	0	0	0	0	0	0	0	0	0	0	0	0	0
	1700010I14Rik	1700010I14Rik|-|-|17|17 A1|protein-coding	NM_025851	0.467667	0.49275	0.3414	0.235333	1.46604	2.18031	2.40423	1.61187	-0.256698	0.43	0.619	0.152473	0.714	0.808	-0.792	0.0552	0.115	-0.338872	0.255	0.612	-1.08	0.0025	0.0141	0.640507	0.128956	0.339335	0.43	0.587	0.386	0.551	0.471	0.395	0.554	0.523	0.371	0.413	0.144	0.256	0.211	0.182	0.445	0.182	0.191	0.201	0.319	0.226
	1700010J16Rik	1700010J16Rik|-|-|10|10 D2|ncRNA	NR_040579	0.0143333	0	0	0	#DIV/0!	0	#DIV/0!	#DIV/0!	0.103793	0.71	1	0.0372416	0.945	1	-1.08	0.759	1	NA	1	1	NA	1	1	NA	1	1	0.043	0	0	0	0	0	0	0	0	0	0	0	0	0	0	0	0	0	0	0.076
	1700010K23Rik	1700010K23Rik|-|-|16|16 C1.3|ncRNA	NR_040512	22.313	27.223	19.699	19.4383	0.8013	0.826793	0.823227	0.659799	-0.46122	0.0599	0.162	-0.158602	0.473	0.603	-0.0195	0.933	0.959	-0.286381	0.201	0.55	-0.511	0.0416	0.122	0.186169	0.41092	0.647021	22.372	25.123	19.444	28.056	31.934	31.245	17.657	18.315	23.125	26.066	15.246	15.743	22.183	10.842	18.554	22.957	23.335	18.759	27.846	32.926
	1700011B04Rik	1700011B04Rik|-|-|13|13 A3.3|ncRNA	NR_045616	0.0666667	0.0075	0	0	#DIV/0!	#DIV/0!	#DIV/0!	#DIV/0!	0.26589	0.437	1	0.33363	0.542	1	-2.84	0.401	1	0.00913838	0.946	1	-0.583	0.857	1	NA	1	1	0	0.2	0	0.03	0	0	0	0	0	0	0	0	0	0	0	0	0	0	0	0
	1700011C11Rik	1700011C11Rik|-|-|7|7 D1|ncRNA	NR_126462	0	0	0	0	#DIV/0!	#DIV/0!	#DIV/0!	#DIV/0!	NA	1	1	NA	1	1	NA	1	1	NA	1	1	NA	1	1	NA	1	1	0	0	0	0	0	0	0	0	0	0	0	0	0	0	0	0	0	0	0	0
	1700011H14Rik	1700011H14Rik|-|-|14|14 C1|protein-coding	NM_025956	0.0766667	0.00775	0	0	#DIV/0!	#DIV/0!	#DIV/0!	0	0.772098	0.113	1	1.08062	0.132	0.227	-3.91	0.0582	0.121	-0.01273	0.925	1	-1.12	0.727	1	NA	1	1	0.066	0.111	0.053	0	0.031	0	0	0	0	0	0	0	0	0	0	0	0	0	0	0
	1700011I03Rik	1700011I03Rik|4930583I06Rik|-|18|18 D3|protein-coding	NM_001311063	0.236333	0.17625	0.1172	0.138167	0.302603	0.315295	0.315054	0.199663	0.106901	0.842	0.912	0.531434	0.424	0.558	-0.638	0.566	0.69	-0.114331	0.696	0.902	-0.388	0.779	0.874	-0.0835828	0.939682	0.975687	0.153	0.296	0.26	0	0.206	0	0.499	0	0.061	0.075	0.137	0.313	0	0	0.148	0.035	0.45	0.196	0.781	0.559
	1700011L22Rik	1700011L22Rik|-|-|8|8 C1|protein-coding	NM_026315	0	0	0	0	#DIV/0!	0	#DIV/0!	#DIV/0!	NA	1	1	NA	1	1	NA	1	1	NA	1	1	NA	1	1	NA	1	1	0	0	0	0	0	0	0	0	0	0	0	0	0	0	0	0	0	0	0	0.046
	1700011M02Rik	1700011M02Rik|-|-|X|X D|ncRNA	NR_073044	0	0	0	0.0123333	#DIV/0!	0	#DIV/0!	#DIV/0!	NA	1	1	NA	1	1	1.13	0.75	1	NA	1	1	0.619	0.848	1	0.335438	0.915169	1	0	0	0	0	0	0	0	0	0	0	0	0	0	0	0	0.074	0	0	0	0.053
	1700012A03Rik	1700012A03Rik|AI429084|-|6|6 A3.3|protein-coding	NM_029587	0.014	0	0	0	0.297872	0	#DIV/0!	#DIV/0!	0.103793	0.71	1	0.0372416	0.945	1	-1.08	0.759	1	NA	1	1	NA	1	1	NA	1	1	0.042	0	0	0	0	0	0	0	0	0	0	0	0	0	0	0	0	0	0.047	0.024
	1700012B07Rik	1700012B07Rik|1700069D21Rik|-|11|11 E1|protein-coding	NM_001162428	0	0.007	0	0	#DIV/0!	#DIV/0!	#DIV/0!	#DIV/0!	-0.142496	0.61	1	NA	1	1	NA	1	1	-0.0194465	0.886	1	-1.27	0.691	1	NA	1	1	0	0	0	0.028	0	0	0	0	0	0	0	0	0	0	0	0	0	0	0	0
	1700012B09Rik	1700012B09Rik|1700007P19Rik|-|9|9 A2|protein-coding	NM_029306	0.207333	0.3285	0.1072	0.464667	#DIV/0!	9.95455	0.824615	#DIV/0!	-0.361755	0.5	0.678	0.472634	0.532	0.656	1.37	0.183	0.301	-0.462511	0.137	0.457	0.615	0.455	0.629	-2.4282	0.0145804	0.0836809	0.197	0	0.425	0.029	0.343	0.702	0.24	0.287	0	0.048	0	0.201	0.965	0.39	0.381	0.499	0	0.553	0	0.033
	1700012C14Rik	1700012C14Rik|-|-|6|6 A3.3|ncRNA	NR_131049	0.342	0.2335	0.1234	0.194167	0.997085	1.74254	0.693258	0.79904	0.229023	0.659	0.8	0.668942	0.356	0.492	-0.702	0.466	0.6	-0.208456	0.516	0.815	-0.337	0.691	0.814	-0.350394	0.752192	0.876664	0.269	0.217	0.54	0.196	0.289	0.175	0.274	0	0.215	0.264	0	0.138	0	0.305	0.372	0.062	0.288	0.138	0.343	0.134
	1700012D01Rik	1700012D01Rik|-|-|10|10 D3|ncRNA	NR_045171	0.294333	0.317	0.4386	0.656667	0.47937	0.762019	0.86	1.16019	-0.161147	0.748	0.858	-0.614119	0.297	0.431	1.34	0.00717	0.021	0.251053	0.465	0.782	1.12	0.0251	0.0835	-0.620677	0.226248	0.465164	0.303	0.372	0.208	0.112	0.207	0.438	0.511	0.704	0.307	0.308	0.086	0.788	0.486	0.818	0.533	0.889	0.721	0.493	0.614	0.416
	1700012D14Rik	1700012D14Rik|-|-|7|7 E3|ncRNA	NR_015573	0.598667	0.39475	0.3598	0.425167	0.73366	1.39488	1.09362	1.17449	0.273865	0.577	0.739	0.393082	0.492	0.62	-0.279	0.654	0.761	-0.0489319	0.886	0.966	0.101	0.855	0.92	-0.19445	0.721674	0.859951	0.214	0.858	0.724	0.589	0.401	0.415	0.174	0.312	0.255	0.34	0.238	0.654	0.658	0.483	0.324	0.246	0.513	0.327	0.816	0.283
	1700012D16Rik	1700012D16Rik|-|-|3|3 H3|ncRNA	NR_126464	0.022	0	0	0	#DIV/0!	#DIV/0!	#DIV/0!	#DIV/0!	0.103793	0.71	1	0.0372416	0.945	1	-1.08	0.759	1	NA	1	1	NA	1	1	NA	1	1	0.066	0	0	0	0	0	0	0	0	0	0	0	0	0	0	0	0	0	0	0
	1700012H19Rik	1700012H19Rik|-|-|11|11 E2|ncRNA	NR_130164	0	0	0	0	#DIV/0!	#DIV/0!	#DIV/0!	#DIV/0!	NA	1	1	NA	1	1	NA	1	1	NA	1	1	NA	1	1	NA	1	1	0	0	0	0	0	0	0	0	0	0	0	0	0	0	0	0	0	0	0	0
	1700012I11Rik	1700012I11Rik|-|-|15|15 D2|ncRNA	NR_045140	0	0	0	0	#DIV/0!	0	#DIV/0!	#DIV/0!	NA	1	1	NA	1	1	NA	1	1	NA	1	1	NA	1	1	NA	1	1	0	0	0	0	0	0	0	0	0	0	0	0	0	0	0	0	0	0	0	0.043
	1700012P22Rik	1700012P22Rik|-|-|4|4 E1|protein-coding	NM_027056	0	0	0	0	#DIV/0!	#DIV/0!	#DIV/0!	#DIV/0!	NA	1	1	NA	1	1	NA	1	1	NA	1	1	NA	1	1	NA	1	1	0	0	0	0	0	0	0	0	0	0	0	0	0	0	0	0	0	0	0	0
	1700013D24Rik	1700013D24Rik|-|-|6|6 F2|protein-coding	NM_001177502	0.027	0.0205	0	0	#DIV/0!	#DIV/0!	#DIV/0!	#DIV/0!	0.0585241	0.845	1	0.0642719	0.905	1	-1.25	0.719	1	0.00913838	0.946	1	-0.583	0.857	1	NA	1	1	0	0.081	0	0	0	0.082	0	0	0	0	0	0	0	0	0	0	0	0	0	0
	1700013F07Rik	1700013F07Rik|-|-|3|3 F3|protein-coding	NM_029314	0.558	0.56925	0.1174	0.448667	0.589852	0.790625	0.179237	0.395301	-0.169345	0.704	0.83	1.3333	0.0485	0.0987	-0.122	0.829	0.889	-0.935192	0.00644	0.0667	-0.351	0.44	0.615	-1.67146	0.0222536	0.11106	0.816	0.294	0.564	0.498	0.675	0.592	0.512	0.167	0	0.252	0.051	0.117	0.384	0.711	0.568	0.316	0.305	0.408	0.946	0.72
	1700013G24Rik	1700013G24Rik|AI507018|-|4|4 D3|protein-coding	NM_027063	0	0	0	0	#DIV/0!	#DIV/0!	#DIV/0!	#DIV/0!	NA	1	1	NA	1	1	NA	1	1	NA	1	1	NA	1	1	NA	1	1	0	0	0	0	0	0	0	0	0	0	0	0	0	0	0	0	0	0	0	0
	1700013H16Rik	1700013H16Rik|Slx2|Xlr6|-|X|X A5|protein-coding	NM_001200013	0	0	0.0112	0	#DIV/0!	#DIV/0!	#DIV/0!	#DIV/0!	NA	1	1	-0.296912	0.579	1	NA	1	1	0.0614787	0.649	1	NA	1	1	1.51548	0.6292	1	0	0	0	0	0	0	0	0	0	0	0	0.056	0	0	0	0	0	0	0	0
	1700015E13Rik	1700015E13Rik|-|-|1|1 H3|protein-coding	NM_001039593	0	0	0	0.03	0	0	0	#DIV/0!	NA	1	1	NA	1	1	2.62	0.454	1	NA	1	1	2.12	0.507	1	-1.15787	0.710221	1	0	0	0	0	0	0	0	0	0	0	0	0	0	0	0	0.13	0.05	0	0.36	0.375
	1700015F17Rik	1700015F17Rik|Gm1686|-|5|5 A1|protein-coding	NM_001200025	0.0383333	0.0525	0.017	0.0215	0.628415	0.276316	0.404762	0.25	-0.129929	0.771	1	0.0548065	0.931	0.958	-0.83	0.686	1	-0.0701471	0.702	1	-1.43	0.426	1	0.608258	0.790993	1	0.027	0	0.088	0.055	0	0	0.155	0	0	0	0.085	0	0	0.054	0.026	0	0	0.049	0.061	0.19
	1700015G11Rik	1700015G11Rik|Ccdc179|-|7|7 B4|protein-coding	NM_001195601	0	0	0	0	#DIV/0!	#DIV/0!	#DIV/0!	#DIV/0!	NA	1	1	NA	1	1	NA	1	1	NA	1	1	NA	1	1	NA	1	1	0	0	0	0	0	0	0	0	0	0	0	0	0	0	0	0	0	0	0	0
	1700016C15Rik	1700016C15Rik|-|-|1|1 H4|protein-coding	NM_027077	0.045	0.029	0.0184	0	0.789474	0.322222	0.46	#DIV/0!	0.0794384	0.855	1	0.254061	0.699	0.796	-2.54	0.454	1	-0.0428711	0.804	1	-2.14	0.499	1	1.51548	0.6292	1	0.052	0	0.083	0.079	0	0	0.037	0	0	0	0	0.092	0	0	0	0	0	0	0.057	0.09
	1700016D06Rik	1700016D06Rik|-|-|8|8 A1.1|protein-coding	NM_024271	0	0	0	0	#DIV/0!	#DIV/0!	#DIV/0!	#DIV/0!	NA	1	1	NA	1	1	NA	1	1	NA	1	1	NA	1	1	NA	1	1	0	0	0	0	0	0	0	0	0	0	0	0	0	0	0	0	0	0	0	0
	1700016G22Rik	1700016G22Rik|-|-|13|13 A1|ncRNA	NR_045891	0	0	0	0	0	#DIV/0!	#DIV/0!	#DIV/0!	NA	1	1	NA	1	1	NA	1	1	NA	1	1	NA	1	1	NA	1	1	0	0	0	0	0	0	0	0	0	0	0	0	0	0	0	0	0	0	0.072	0
	1700016H13Rik	1700016H13Rik|-|-|5|5 E5|protein-coding	NM_001163550	0.00866667	0	0.0174	0.00733333	0.157576	0	#DIV/0!	0.385965	0.0334247	0.905	1	-0.148073	0.783	1	0.166	0.963	1	0.0614787	0.649	1	0.619	0.848	1	1.03459	0.741676	1	0	0	0.026	0	0	0	0	0	0	0	0	0.087	0	0	0	0	0	0.044	0.055	0.028
	1700016K19Rik	1700016K19Rik|Liat1|-|11|11 B5|protein-coding	NM_198637	2.34767	1.217	1.0718	1.8415	0.526855	0.331156	0.40691	0.607956	0.687979	0.0579	0.157	0.825776	0.0193	0.0447	-0.161	0.624	0.739	-0.0523061	0.866	0.959	0.626	0.0853	0.203	-0.708488	0.0307699	0.136922	2.27	1.852	2.921	0.614	1.096	0.992	2.166	1.809	0.465	1.091	0.877	1.117	2.041	1.978	2.636	1.478	1.167	1.749	4.456	3.675
	1700016L04Rik	1700016L04Rik|-|-|10|10 A2|ncRNA	NR_045824	0	0.0125	0.0066	0.0155	0	0.168919	0.2	0.115672	-0.142496	0.61	1	-0.296912	0.579	1	2.07	0.527	1	0.00969513	0.947	1	0.146	0.944	1	0.073637	0.976073	1	0	0	0	0	0.02	0	0.03	0	0	0	0.033	0	0	0	0.02	0.034	0.039	0	0.094	0.074
	1700016L21Rik	1700016L21Rik|Jr3|-|1|1 C5|ncRNA	NR_040460	0	0	0	0	#DIV/0!	#DIV/0!	#DIV/0!	#DIV/0!	NA	1	1	NA	1	1	NA	1	1	NA	1	1	NA	1	1	NA	1	1	0	0	0	0	0	0	0	0	0	0	0	0	0	0	0	0	0	0	0	0
	1700016P04Rik	1700016P04Rik|-|-|6|6 A1|ncRNA	NR_038149	0	0	0	0	#DIV/0!	#DIV/0!	#DIV/0!	#DIV/0!	NA	1	1	NA	1	1	NA	1	1	NA	1	1	NA	1	1	NA	1	1	0	0	0	0	0	0	0	0	0	0	0	0	0	0	0	0	0	0	0	0
	1700017B05Rik	1700017B05Rik|AA682102|D9Ertd278e|-|9 B|9 30.89 cM|protein-coding	NM_028820	2.74067	4.6455	4.6124	5.6075	2.99526	3.14949	2.35327	2.63882	-0.927895	8.56e-06	0.00013	-1.04893	1.1e-05	5.42e-05	1.22	3.92e-10	4.41e-09	0.0996043	0.65	0.88	0.25	0.193	0.355	-0.137209	0.524561	0.730653	2.747	3.201	2.274	5.235	4.447	5.063	3.837	2.475	4.872	5.202	4.071	6.442	5.617	4.256	4.688	6.118	6.173	6.793	0.915	1.475
	1700017D01Rik	1700017D01Rik|-|-|19|19 A|protein-coding	NM_027058	0	0	0	0	#DIV/0!	#DIV/0!	#DIV/0!	#DIV/0!	NA	1	1	NA	1	1	NA	1	1	NA	1	1	NA	1	1	NA	1	1	0	0	0	0	0	0	0	0	0	0	0	0	0	0	0	0	0	0	0	0
	1700017G19Rik	1700017G19Rik|-|-|3|3 B|ncRNA	NR_040445	0	0	0.0056	0	0	#DIV/0!	0.466667	0	NA	1	1	-0.296912	0.579	1	NA	1	1	0.0614787	0.649	1	NA	1	1	1.51548	0.6292	1	0	0	0	0	0	0	0	0	0	0	0	0.028	0	0	0	0	0	0	0.017	0
	1700017J07Rik	1700017J07Rik|-|-|2|2 H3|ncRNA	NR_040326	0	0	0.0416	0.0465	#DIV/0!	#DIV/0!	#DIV/0!	#DIV/0!	NA	1	1	-0.296912	0.579	1	2.95	0.399	1	0.0614787	0.649	1	2.44	0.443	1	-0.789775	0.781152	1	0	0	0	0	0	0	0	0.208	0	0	0	0	0.279	0	0	0	0	0	0	0
	1700017L05Rik	1700017L05Rik|-|-|5|5 C3.3|ncRNA	NR_131050	0	0	0	0	#DIV/0!	#DIV/0!	#DIV/0!	#DIV/0!	NA	1	1	NA	1	1	NA	1	1	NA	1	1	NA	1	1	NA	1	1	0	0	0	0	0	0	0	0	0	0	0	0	0	0	0	0	0	0	0	0
	1700017N19Rik	1700017N19Rik|-|-|10|10 D1|protein-coding	NM_001081246	0	0	0	0	#DIV/0!	#DIV/0!	#DIV/0!	#DIV/0!	NA	1	1	NA	1	1	NA	1	1	NA	1	1	NA	1	1	NA	1	1	0	0	0	0	0	0	0	0	0	0	0	0	0	0	0	0	0	0	0	0
	1700018A04Rik	1700018A04Rik|4930551G20Rik|4933439J11Rik|-|13|13 A3.2|ncRNA	NR_029439	0	0	0	0	#DIV/0!	0	#DIV/0!	#DIV/0!	NA	1	1	NA	1	1	NA	1	1	NA	1	1	NA	1	1	NA	1	1	0	0	0	0	0	0	0	0	0	0	0	0	0	0	0	0	0	0	0	0.063
	1700018B08Rik	1700018B08Rik|1700084O22Rik|-|8|8 E1|protein-coding	NM_029597	0	0	0	0	#DIV/0!	#DIV/0!	#DIV/0!	0	NA	1	1	NA	1	1	NA	1	1	NA	1	1	NA	1	1	NA	1	1	0	0	0	0	0	0	0	0	0	0	0	0	0	0	0	0	0	0	0	0
	1700018B24Rik	1700018B24Rik|-|-|3|3 C|pseudo	NR_003617	0	0.00275	0.0036	0.0168333	#DIV/0!	0.1375	#DIV/0!	0.543011	-0.142496	0.61	1	-0.384754	0.473	1	4.29	0.134	0.236	0.0417565	0.761	1	2.49	0.293	0.471	-1.59645	0.49008	1	0	0	0	0	0.011	0	0	0	0	0	0.018	0	0	0.09	0	0	0.011	0	0	0.02
	1700018C11Rik	1700018C11Rik|bM230C2.3|-|4|4 C1|protein-coding	NM_029324	0.021	0.017	0.009	0.009	#DIV/0!	0.253731	0.204545	#DIV/0!	-0.000402526	0.999	1	-0.0335617	0.952	1	-0.799	0.811	1	0.00969513	0.947	1	-0.795	0.792	1	1.03459	0.741676	1	0	0.032	0.031	0	0.027	0	0.041	0	0	0	0.045	0	0	0	0	0	0.054	0	0	0.067
	1700018F24Rik	1700018F24Rik|AV045857|-|5|5 G2|protein-coding	NM_027069	0	0.004	0	0	#DIV/0!	#DIV/0!	#DIV/0!	#DIV/0!	-0.0897196	0.748	1	NA	1	1	NA	1	1	0.00913838	0.946	1	-0.583	0.857	1	NA	1	1	0	0	0	0	0.016	0	0	0	0	0	0	0	0	0	0	0	0	0	0	0
	1700018G05Rik	1700018G05Rik|-|-|X|X D|ncRNA	NR_045422	0.124667	0.10875	0.0962	0.0378333	0.289922	#DIV/0!	0.258602	0.141698	-0.00716749	0.989	0.995	-0.0464157	0.951	0.97	-1.62	0.463	0.597	0.0267135	0.925	1	-1.65	0.276	0.451	1.71932	0.323904	1	0.048	0.326	0	0.098	0.091	0.109	0.137	0	0	0.083	0.226	0.172	0	0	0.047	0	0.18	0	0.43	0
	1700018L02Rik	1700018L02Rik|-|-|19|19 C1|ncRNA	NR_028360	1.048	2.9835	3.9442	3.77983	0.626045	1.74678	1.986	1.56775	-1.51634	9.29e-07	1.95e-05	-2.11026	1.04e-11	1.19e-10	2.02	7.9e-11	9.73e-10	0.477175	0.0334	0.199	0.35	0.121	0.258	0.193938	0.395239	0.634711	0.69	0.966	1.488	2.026	3.124	3.268	3.516	3.055	3.419	2.908	4.421	5.918	4.387	2.912	4.414	4.104	4.123	2.739	1.674	1.708
	1700019A02Rik	1700019A02Rik|-|-|1|1 C1.1|protein-coding	NM_027070	0	0.011	0	0.00966667	0	#DIV/0!	#DIV/0!	0.0785908	-0.0897196	0.748	1	NA	1	1	1.13	0.75	1	0.00913838	0.946	1	-0.102	0.975	1	0.335438	0.915169	1	0	0	0	0	0	0	0.044	0	0	0	0	0	0	0	0	0	0.058	0	0.069	0
	1700019B03Rik	1700019B03Rik|-|-|8|8 A1.1|protein-coding	NM_029598	0.037	0.00975	0	0.00716667	0.232704	0.232143	#DIV/0!	0.188596	0.382637	0.399	1	0.539885	0.377	0.513	-2.32	0.334	0.471	-0.0361105	0.791	1	-0.684	0.798	1	-0.199571	0.949398	1	0.072	0	0.039	0	0.022	0	0.017	0	0	0	0	0	0	0	0	0	0	0.043	0.159	0.042
	1700019B21Rik	1700019B21Rik|-|-|X|X A6|ncRNA	NR_045443	0	0	0	0	#DIV/0!	#DIV/0!	#DIV/0!	#DIV/0!	NA	1	1	NA	1	1	NA	1	1	NA	1	1	NA	1	1	NA	1	1	0	0	0	0	0	0	0	0	0	0	0	0	0	0	0	0	0	0	0	0
	1700019C18Rik	1700019C18Rik|-|-|13|13 A3.3|ncRNA	NR_126478	0	0	0	0	#DIV/0!	#DIV/0!	#DIV/0!	#DIV/0!	NA	1	1	NA	1	1	NA	1	1	NA	1	1	NA	1	1	NA	1	1	0	0	0	0	0	0	0	0	0	0	0	0	0	0	0	0	0	0	0	0
	1700019D03Rik	1700019D03Rik|2410136C24Rik|AA410151|smAKAP|-|1|1 C1.1|protein-coding	NM_144953	0.428	1.0725	1.0914	1.119	0.111284	0.260759	0.316991	0.320447	-1.29807	0.000608	0.00449	-1.46531	0.00117	0.00377	1.6	7.21e-05	0.000358	0.0797086	0.795	0.934	0.071	0.828	0.905	0.0281817	0.940242	0.976072	0.575	0.337	0.372	0.819	1.535	0.887	1.049	0.941	0.706	0.533	1.22	2.057	1.489	1.184	1.223	0.928	0.903	0.987	3.846	4.113
	1700019E08Rik	1700019E08Rik|-|-|2|2 B|ncRNA	NR_040497	0	0	0	0	#DIV/0!	#DIV/0!	#DIV/0!	#DIV/0!	NA	1	1	NA	1	1	NA	1	1	NA	1	1	NA	1	1	NA	1	1	0	0	0	0	0	0	0	0	0	0	0	0	0	0	0	0	0	0	0	0
	1700019G24Rik	1700019G24Rik|-|-|6|6 A1|ncRNA	NR_040255	0.173333	0.30825	0.312	0.279167	0.416667	3.5431	#DIV/0!	9.62644	-0.336761	0.518	0.693	-0.696365	0.338	0.474	0.969	0.531	0.66	0.0820636	0.806	0.939	0.0513	0.966	0.982	0.172082	0.864373	0.937658	0.037	0	0.483	0	0.385	0.423	0.425	0.381	0.52	0.352	0.174	0.133	0.475	0.96	0.18	0.06	0	0	0.416	0.087
	1700019M22Rik	1700019M22Rik|-|-|12|12 E|pseudo	NR_103800	0	0	0	0	#DIV/0!	#DIV/0!	#DIV/0!	#DIV/0!	NA	1	1	NA	1	1	NA	1	1	NA	1	1	NA	1	1	NA	1	1	0	0	0	0	0	0	0	0	0	0	0	0	0	0	0	0	0	0	0	0
	1700019N19Rik	1700019N19Rik|-|-|19|19 D2|protein-coding	NM_026208	0.007	0.005	0	0.0131667	0.148936	0.0684932	0	#DIV/0!	-0.0193514	0.945	1	-0.0715375	0.894	1	0.95	0.771	1	0.00913838	0.946	1	0.683	0.819	1	-0.447109	0.886755	1	0.021	0	0	0	0.02	0	0	0	0	0	0	0	0	0	0.04	0	0.039	0	0.047	0.073
	1700019O17Rik	1700019O17Rik|-|-|1|1 C5|protein-coding	NM_027966	0	0	0.008	0	#DIV/0!	#DIV/0!	0.470588	#DIV/0!	NA	1	1	-0.296912	0.579	1	NA	1	1	0.0614787	0.649	1	NA	1	1	1.51548	0.6292	1	0	0	0	0	0	0	0	0	0	0	0	0.04	0	0	0	0	0	0	0	0
	1700019P21Rik	1700019P21Rik|-|-|1|1 E4|ncRNA	NR_138576	0	0	0	0	#DIV/0!	#DIV/0!	#DIV/0!	#DIV/0!	NA	1	1	NA	1	1	NA	1	1	NA	1	1	NA	1	1	NA	1	1	0	0	0	0	0	0	0	0	0	0	0	0	0	0	0	0	0	0	0	0
	1700020A23Rik	1700020A23Rik|-|-|2|2 F1|protein-coding	NM_001163483	0	0	0.0086	0.0161667	0	0	0.0677165	#DIV/0!	NA	1	1	-0.296912	0.579	1	1.91	0.588	1	0.0614787	0.649	1	1.4	0.663	1	0.248645	0.93402	1	0	0	0	0	0	0	0	0	0	0	0.043	0	0	0	0.053	0.044	0	0	1.098	0.159
	1700020D05Rik	1700020D05Rik|mage-g2|-|19|19 A|protein-coding	NM_023781	0	0.0155	0.0234	0.006	0	0.238462	0.268966	0.0576923	-0.186684	0.505	1	-0.426957	0.434	0.567	1.52	0.668	1	0.0763726	0.669	1	-0.82	0.777	1	1.75976	0.571061	1	0	0	0	0	0.035	0	0.027	0	0	0	0.117	0	0	0	0.036	0	0	0	0.461	0.065
	1700020D14Rik	1700020D14Rik|-|-|Ypter|Y|ncRNA	NR_126545	0	0	0	0	#DIV/0!	#DIV/0!	#DIV/0!	#DIV/0!	NA	1	1	NA	1	1	NA	1	1	NA	1	1	NA	1	1	NA	1	1	0	0	0	0	0	0	0	0	0	0	0	0	0	0	0	0	0	0	0	0
	1700020G17Rik	1700020G17Rik|4930480D05Rik|-|10|10 D1|ncRNA	NR_045979	0	0	0	0	#DIV/0!	#DIV/0!	#DIV/0!	#DIV/0!	NA	1	1	NA	1	1	NA	1	1	NA	1	1	NA	1	1	NA	1	1	0	0	0	0	0	0	0	0	0	0	0	0	0	0	0	0	0	0	0	0
	1700020I14Rik	1700020I14Rik|1190006L01Rik|4933437I03Rik|AI451541|AI585852|AW538376|AW558897|Cyrano|-|2|2 E5|ncRNA	NR_027832	13.7643	12.8872	11.336	8.93217	0.169363	0.23565	0.193543	0.201638	-0.122108	0.626	0.776	-0.110139	0.67	0.773	-0.374	0.142	0.247	-0.0133921	0.957	0.986	-0.508	0.051	0.141	0.493202	0.0541788	0.197831	15.019	11.566	14.708	10.73	12.103	9.565	19.151	5.741	9.474	11.335	14.163	15.967	11.937	8.948	9.208	7.494	9.041	6.965	81.271	54.688
	1700020L24Rik	1700020L24Rik|-|-|11|11 C|protein-coding	NM_025492	0.506	1.787	3.418	4.31333	0.407736	1.77811	5.65894	3.00581	-1.79875	5.06e-08	1.54e-06	-2.95921	7.28e-24	2.45e-22	3.28	9.96e-29	5.85e-27	0.919423	0.000111	0.00302	1.26	6.3e-07	1.21e-05	-0.193166	0.383867	0.62521	0.495	0.511	0.512	2.076	1.627	2.152	1.293	2.213	3.91	3.01	3.312	4.645	3.902	4.857	5.222	4.823	3.39	3.686	1.241	1.005
	1700020M21Rik	1700020M21Rik|-|-|9 F4|9|ncRNA	NR_040742	0	0	0	0	#DIV/0!	#DIV/0!	#DIV/0!	#DIV/0!	NA	1	1	NA	1	1	NA	1	1	NA	1	1	NA	1	1	NA	1	1	0	0	0	0	0	0	0	0	0	0	0	0	0	0	0	0	0	0	0	0
	1700020N01Rik	1700020N01Rik|-|-|10|10 A3|ncRNA	NR_027968	0	0	0	0.00533333	#DIV/0!	0	#DIV/0!	#DIV/0!	NA	1	1	NA	1	1	1.13	0.75	1	NA	1	1	0.619	0.848	1	0.335438	0.915169	1	0	0	0	0	0	0	0	0	0	0	0	0	0	0	0	0	0	0.032	0	0.021
	1700020N15Rik	1700020N15Rik|-|-|X|X A7.2|protein-coding	NM_029316	0	0	0	0	#DIV/0!	#DIV/0!	#DIV/0!	#DIV/0!	NA	1	1	NA	1	1	NA	1	1	NA	1	1	NA	1	1	NA	1	1	0	0	0	0	0	0	0	0	0	0	0	0	0	0	0	0	0	0	0	0
	1700020N18Rik	1700020N18Rik|-|-|1|1 D|ncRNA	NR_026924	0.0233333	0	0	0	#DIV/0!	0	0	0	0.103793	0.71	1	0.0372416	0.945	1	-1.08	0.759	1	NA	1	1	NA	1	1	NA	1	1	0.07	0	0	0	0	0	0	0	0	0	0	0	0	0	0	0	0	0	0	0.082
	1700021F05Rik	1700021F05Rik|-|-|10|10 B2|protein-coding	NM_026411	30.222	21.2327	17.6788	16.9242	1.33325	1.01345	1.01393	0.818423	0.298868	0.179	0.349	0.44285	0.00488	0.0135	-0.622	0.0421	0.0926	-0.127523	0.475	0.788	-0.315	0.278	0.453	0.177818	0.463961	0.687403	27.659	30.577	32.43	27.099	20.111	17.097	20.624	16.74	15.699	21.064	17.591	17.3	18.762	23.261	19.883	11.188	12.877	15.574	22.668	20.951
	1700021F07Rik	1700021F07Rik|-|-|2|2 H3|protein-coding	NM_028158	0	0.01075	0	0	#DIV/0!	0.307143	#DIV/0!	0	-0.0897196	0.748	1	NA	1	1	NA	1	1	0.00913838	0.946	1	-0.583	0.857	1	NA	1	1	0	0	0	0	0	0	0.043	0	0	0	0	0	0	0	0	0	0	0	0	0.035
	1700021N21Rik	1700021N21Rik|-|-|4|4 D3|ncRNA	NR_045800	0.239	0.335	0.5636	0.941333	0.844523	0.486919	0.575102	0.535762	-0.451087	0.367	0.56	-1.21186	0.0417	0.0866	2.19	9.15e-05	0.000444	0.445019	0.194	0.541	1.52	0.00129	0.00815	-0.687113	0.173549	0.402152	0.127	0.453	0.137	0.151	0.298	0.288	0.603	0.866	0.118	0.2	0.726	0.908	0.54	1.425	1.412	0.956	0.672	0.643	0.283	0.688
	1700022A21Rik	1700022A21Rik|-|-|5|5 A3|pseudo	NR_003953	0.0143333	0	0.0042	0	#DIV/0!	0	#DIV/0!	#DIV/0!	0.174951	0.533	1	0.0574789	0.916	1	-1.9	0.58	1	0.0614787	0.649	1	NA	1	1	1.51548	0.6292	1	0	0	0.043	0	0	0	0	0	0	0	0.021	0	0	0	0	0	0	0	0	0.015
	1700022A22Rik	1700022A22Rik|4933413D07Rik|-|15|15 B3.3|ncRNA	NR_045509	0	0	0	0	#DIV/0!	#DIV/0!	#DIV/0!	#DIV/0!	NA	1	1	NA	1	1	NA	1	1	NA	1	1	NA	1	1	NA	1	1	0	0	0	0	0	0	0	0	0	0	0	0	0	0	0	0	0	0	0	0
	1700022E09Rik	1700022E09Rik|-|-|16|16 C1.3|ncRNA	NR_040568	0	0	0	0	#DIV/0!	#DIV/0!	#DIV/0!	#DIV/0!	NA	1	1	NA	1	1	NA	1	1	NA	1	1	NA	1	1	NA	1	1	0	0	0	0	0	0	0	0	0	0	0	0	0	0	0	0	0	0	0	0
	1700022H01Rik	1700022H01Rik|-|-|10|10 B4|ncRNA	NR_126477	0.195667	0.1395	0.1536	0.233833	0.348161	0.611842	1.78605	1.75815	0.12936	0.809	0.893	0.0541472	0.939	0.963	0.511	0.613	0.731	0.0545556	0.87	0.962	0.73	0.402	0.58	-0.568104	0.518493	0.725673	0.336	0.221	0.03	0.114	0.237	0.127	0.08	0.143	0.078	0.072	0.175	0.3	0.027	0.72	0.162	0.135	0.209	0.15	0.562	0.228
	1700022H16Rik	1700022H16Rik|-|-|12|12 A1.1|ncRNA	NR_045488	0	0	0	0	#DIV/0!	#DIV/0!	#DIV/0!	#DIV/0!	NA	1	1	NA	1	1	NA	1	1	NA	1	1	NA	1	1	NA	1	1	0	0	0	0	0	0	0	0	0	0	0	0	0	0	0	0	0	0	0	0
	1700022I11Rik	1700022I11Rik|-|-|4 A5|4|protein-coding	NM_026088	0	0.00425	0	0	0	#DIV/0!	0	#DIV/0!	-0.205404	0.474	1	NA	1	1	NA	1	1	-0.0420933	0.758	1	-1.81	0.569	1	NA	1	1	0	0	0	0.01	0	0	0.007	0	0	0	0	0	0	0	0	0	0	0	0.034	0
	1700023C21Rik	1700023C21Rik|-|-|11|11 E1|ncRNA	NR_045909	0	0	0	0	#DIV/0!	#DIV/0!	#DIV/0!	#DIV/0!	NA	1	1	NA	1	1	NA	1	1	NA	1	1	NA	1	1	NA	1	1	0	0	0	0	0	0	0	0	0	0	0	0	0	0	0	0	0	0	0	0
	1700023F02Rik	1700023F02Rik|AV205046|-|10|10 B5.1|ncRNA	NR_038039	0.572	0.2365	0.027	0	2.29719	0.303985	0.313953	0	0.559809	0.296	0.487	1.78624	0.0177	0.0414	-5.09	0.00194	0.00673	-0.323444	0.19	1	-3.93	0.0489	0.137	1.85325	0.554114	1	0.503	0.189	1.024	0	0.262	0.127	0.557	0	0	0.048	0.087	0	0	0	0	0	0	0	0.249	0.778
	1700023F06Rik	1700023F06Rik|-|-|11|11 E1|protein-coding	NM_001254724	0.973	0.236	0.5874	0.809167	0.904275	0.168451	0.550515	0.677127	1.43827	0.00187	0.0111	0.441454	0.27	0.403	-0.0675	0.884	0.925	0.792986	0.0201	0.145	1.84	0.00152	0.00937	-0.393032	0.379472	0.621369	0.869	0.887	1.163	0.098	0.091	0.182	0.573	0.74	0.224	0.401	0.652	0.92	0.52	1.496	1.073	0.467	0.781	0.518	1.076	1.401
	1700024B18Rik	1700024B18Rik|-|-|14|14 E5|ncRNA	NR_045479	0	0	0.0284	0	#DIV/0!	#DIV/0!	#DIV/0!	#DIV/0!	NA	1	1	-0.384754	0.473	1	NA	1	1	0.0844658	0.534	1	NA	1	1	2.04184	0.513887	1	0	0	0	0	0	0	0	0	0	0	0.142	0	0	0	0	0	0	0	0	0
	1700024F13Rik	1700024F13Rik|-|-|13 A1|13|ncRNA	NR_045363	0.0943333	0.061	0.11	0.130167	0.36849	0.203333	0.497738	1.15192	0.143223	0.775	0.873	-0.163448	0.827	0.889	0.62	0.598	0.718	0.144067	0.596	1	1.06	0.399	0.577	-0.324754	0.768275	0.886822	0.029	0.161	0.093	0	0.081	0	0.163	0.293	0.08	0.074	0	0.103	0	0.227	0.249	0.046	0.054	0.205	0.256	0.3
	1700024G13Rik	1700024G13Rik|C10orf53|-|14|14 B|protein-coding	NM_001034037	0.308333	0.163	0.1882	0.464333	0.948718	#DIV/0!	2.50933	12.2193	0.31907	0.538	0.708	0.255736	0.734	0.824	0.776	0.462	0.596	0.0911502	0.753	0.92	1.68	0.0682	0.173	-1.23282	0.176216	0.405991	0.243	0	0.682	0	0.183	0.331	0.138	0.497	0	0.292	0.152	0	0.619	0.673	0.329	0.47	0	0.695	0.325	0
	1700024I08Rik	1700024I08Rik|-|-|13|13 B3|ncRNA	NR_126476	0	0	0	0	#DIV/0!	#DIV/0!	#DIV/0!	#DIV/0!	NA	1	1	NA	1	1	NA	1	1	NA	1	1	NA	1	1	NA	1	1	0	0	0	0	0	0	0	0	0	0	0	0	0	0	0	0	0	0	0	0
	1700024N05Rik	1700024N05Rik|-|-|6|6 B2.1|ncRNA	NR_126472	0	0	0	0	#DIV/0!	#DIV/0!	#DIV/0!	#DIV/0!	NA	1	1	NA	1	1	NA	1	1	NA	1	1	NA	1	1	NA	1	1	0	0	0	0	0	0	0	0	0	0	0	0	0	0	0	0	0	0	0	0
	1700024P04Rik	1700024P04Rik|H2bl1|Subh2bv|-|13|13 D1|protein-coding	NM_027064	0	0	0	0	#DIV/0!	#DIV/0!	#DIV/0!	#DIV/0!	NA	1	1	NA	1	1	NA	1	1	NA	1	1	NA	1	1	NA	1	1	0	0	0	0	0	0	0	0	0	0	0	0	0	0	0	0	0	0	0	0
	1700024P16Rik	1700024P16Rik|C1orf168|Gm620|-|4|4 C6|protein-coding	NM_001285953	0.118	0.05125	0.0228	0.0468333	0.291358	0.096516	0.296104	0.793785	0.628691	0.22	0.402	1.5016	0.0229	0.0519	-1.1	0.166	0.28	-0.300284	0.335	0.689	-0.126	0.893	0.941	-0.917967	0.358394	0.601441	0.113	0.092	0.149	0.025	0.1	0	0.08	0.032	0.017	0.043	0	0.022	0.049	0	0.121	0.03	0.07	0.011	0.405	0.531
	1700025B11Rik	1700025B11Rik|-|-|15|15 E1|ncRNA	NR_040310	0	0	0	0	#DIV/0!	#DIV/0!	#DIV/0!	#DIV/0!	NA	1	1	NA	1	1	NA	1	1	NA	1	1	NA	1	1	NA	1	1	0	0	0	0	0	0	0	0	0	0	0	0	0	0	0	0	0	0	0	0
	1700025C18Rik	1700025C18Rik|-|-|2|2 H3|ncRNA	NR_033448	0	0	0	0	#DIV/0!	#DIV/0!	#DIV/0!	#DIV/0!	NA	1	1	NA	1	1	NA	1	1	NA	1	1	NA	1	1	NA	1	1	0	0	0	0	0	0	0	0	0	0	0	0	0	0	0	0	0	0	0	0
	1700025F22Rik	1700025F22Rik|-|-|19|19 A|protein-coding	NM_027074	0	0	0	0	#DIV/0!	#DIV/0!	#DIV/0!	#DIV/0!	NA	1	1	NA	1	1	NA	1	1	NA	1	1	NA	1	1	NA	1	1	0	0	0	0	0	0	0	0	0	0	0	0	0	0	0	0	0	0	0	0
	1700025F24Rik	1700025F24Rik|-|-|10|10 D2|ncRNA	NR_040578	0.066	0.01725	0.0102	0.00633333	0.197015	0.1725	#DIV/0!	#DIV/0!	0.402095	0.37	1	0.50387	0.478	0.607	-2.8	0.26	0.392	0.0364029	0.839	1	-0.795	0.783	1	1.37239	0.657793	1	0.15	0.048	0	0	0.02	0.049	0	0	0	0.018	0.033	0	0	0	0	0	0	0.038	0.335	0.1
	1700025G04Rik	1700025G04Rik|2610510E02Rik|2900042O04Rik|ENSMUSG00000073540|-|1|1 G2|protein-coding	NM_197990	4.65467	4.89275	3.4104	3.151	0.562362	0.390608	0.328777	0.379547	-0.239446	0.257	0.445	0.133065	0.488	0.616	-0.404	0.0137	0.0362	-0.346549	0.0837	0.348	-0.657	0.000417	0.00325	0.274155	0.113101	0.315434	4.606	4.494	4.864	3.835	4.88	4.076	6.78	2.533	2.879	3.084	3.694	4.862	2.843	2.063	4.251	3.123	3.173	3.453	8.277	12.526
	1700025J12Rik	1700025J12Rik|-|-|7|7 F2|ncRNA	NR_131051	0	0	0	0	#DIV/0!	0	#DIV/0!	0	NA	1	1	NA	1	1	NA	1	1	NA	1	1	NA	1	1	NA	1	1	0	0	0	0	0	0	0	0	0	0	0	0	0	0	0	0	0	0	0	0.035
	1700025K24Rik	1700025K24Rik|-|-|17|17 C|ncRNA	NR_045825	0	0	0.0044	0.0166667	#DIV/0!	#DIV/0!	0.055	#DIV/0!	NA	1	1	-0.296912	0.579	1	2.03	0.565	1	0.0614787	0.649	1	1.52	0.636	1	-0.062717	0.98401	1	0	0	0	0	0	0	0	0	0	0.022	0	0	0	0	0.1	0	0	0	0	0
	1700025M24Rik	1700025M24Rik|-|-|5|5 C3.2|ncRNA	NR_040689	0	0	0	0.009	#DIV/0!	#DIV/0!	#DIV/0!	#DIV/0!	NA	1	1	NA	1	1	1.13	0.75	1	NA	1	1	0.619	0.848	1	0.335438	0.915169	1	0	0	0	0	0	0	0	0	0	0	0	0	0	0	0	0.054	0	0	0	0
	1700025N23Rik	1700025N23Rik|-|-|6|6 B1|ncRNA	NR_040523	0	0	0.0238	0	#DIV/0!	#DIV/0!	#DIV/0!	#DIV/0!	NA	1	1	-0.384754	0.473	1	NA	1	1	0.0844658	0.534	1	NA	1	1	2.35798	0.449937	1	0	0	0	0	0	0	0	0	0.119	0	0	0	0	0	0	0	0	0	0	0
	1700026D11Rik	1700026D11Rik|-|-|2|2 F2|ncRNA	NR_028286	0	0	0	0	#DIV/0!	#DIV/0!	#DIV/0!	#DIV/0!	NA	1	1	NA	1	1	NA	1	1	NA	1	1	NA	1	1	NA	1	1	0	0	0	0	0	0	0	0	0	0	0	0	0	0	0	0	0	0	0	0
	1700026F02Rik	1700026F02Rik|-|-|8|8 B3.3|ncRNA	NR_045487	0	0	0	0	#DIV/0!	#DIV/0!	#DIV/0!	#DIV/0!	NA	1	1	NA	1	1	NA	1	1	NA	1	1	NA	1	1	NA	1	1	0	0	0	0	0	0	0	0	0	0	0	0	0	0	0	0	0	0	0	0
	1700026J14Rik	1700026J14Rik|-|-|6|6 B2.3|ncRNA	NR_130985	0.121	0.03925	0.2612	0.197167	1.13084	1.40179	3.52973	1.48246	0.566233	0.279	0.469	-1.02271	0.11	0.197	0.879	0.317	0.453	0.942	0.0047	0.0529	2.34	0.0223	0.0765	0.4666	0.50026	0.712883	0.121	0.19	0.052	0	0.068	0.055	0.034	0.37	0.403	0.124	0.15	0.259	0.165	0	0.373	0.156	0.36	0.129	0.107	0.028
	1700027A15Rik	1700027A15Rik|-|-|1|1 C3|ncRNA	NR_038001	0	0.01425	0	0	#DIV/0!	#DIV/0!	#DIV/0!	#DIV/0!	-0.142496	0.61	1	NA	1	1	NA	1	1	-0.0203154	0.881	1	-1.37	0.669	1	NA	1	1	0	0	0	0.057	0	0	0	0	0	0	0	0	0	0	0	0	0	0	0	0
	1700027F06Rik	1700027F06Rik|-|-|6|6 F2|ncRNA	NR_131162	0	0	0	0	#DIV/0!	#DIV/0!	#DIV/0!	#DIV/0!	NA	1	1	NA	1	1	NA	1	1	NA	1	1	NA	1	1	NA	1	1	0	0	0	0	0	0	0	0	0	0	0	0	0	0	0	0	0	0	0	0
	1700027F09Rik	1700027F09Rik|-|-|5|5 C3.1|ncRNA	NR_040681	0	0.009	0	0	#DIV/0!	#DIV/0!	#DIV/0!	#DIV/0!	-0.0897196	0.748	1	NA	1	1	NA	1	1	0.00913838	0.946	1	-0.583	0.857	1	NA	1	1	0	0	0	0	0	0	0.036	0	0	0	0	0	0	0	0	0	0	0	0	0
	1700027H10Rik	1700027H10Rik|-|-|3|3 B|ncRNA	NR_040594	6.23033	10.268	8.02	8.44183	0.694652	1.05173	0.949674	1.02474	-0.867882	0.000798	0.00556	-0.683203	0.0179	0.0419	0.609	0.0454	0.0984	-0.176609	0.49	0.799	-0.319	0.288	0.466	0.108355	0.723011	0.860668	6.299	7.09	5.302	11.066	12.734	10.551	6.721	6.068	12.599	9.599	5.348	6.486	10.217	3.068	9.276	9.789	8.81	9.491	8.969	9.763
	1700027I24Rik	1700027I24Rik|-|-|9|9 A4|ncRNA	NR_040741	0	0	0	0	#DIV/0!	#DIV/0!	#DIV/0!	#DIV/0!	NA	1	1	NA	1	1	NA	1	1	NA	1	1	NA	1	1	NA	1	1	0	0	0	0	0	0	0	0	0	0	0	0	0	0	0	0	0	0	0	0
	1700027J07Rik	1700027J07Rik|-|-|10|10 B2|ncRNA	NR_040581	0	0	0	0	#DIV/0!	#DIV/0!	#DIV/0!	#DIV/0!	NA	1	1	NA	1	1	NA	1	1	NA	1	1	NA	1	1	NA	1	1	0	0	0	0	0	0	0	0	0	0	0	0	0	0	0	0	0	0	0	0
	1700028B04Rik	1700028B04Rik|-|-|7|7 B1|pseudo	NR_033605	0.0253333	0.18025	0.094	0.1945	#DIV/0!	0.639184	0.35206	0.709854	-0.791344	0.115	0.257	-0.88303	0.238	0.366	3.17	0.0341	0.078	-0.154171	0.581	0.85	0.193	0.863	0.925	-0.921183	0.404599	0.641742	0	0.039	0.037	0.07	0	0.157	0.494	0	0	0.06	0.162	0.248	0.102	0.48	0.335	0.056	0.194	0	0	0.282
	1700028D13Rik	1700028D13Rik|-|-|5|5 F|ncRNA	NR_045378	0	0	0	0	#DIV/0!	#DIV/0!	#DIV/0!	#DIV/0!	NA	1	1	NA	1	1	NA	1	1	NA	1	1	NA	1	1	NA	1	1	0	0	0	0	0	0	0	0	0	0	0	0	0	0	0	0	0	0	0	0
	1700028E10Rik	1700028E10Rik|A630054D14|Gm6561|-|5 G3|5|ncRNA	NR_045700	0.0406667	0.08375	0.106	0.0858333	0.924242	0.728261	1.7377	0.365248	-0.446537	0.401	0.593	-1.25543	0.0695	0.133	1.26	0.253	0.385	0.294174	0.382	0.73	0.204	0.825	0.903	0.559144	0.479174	0.69857	0.079	0	0.043	0.101	0.093	0	0.141	0.101	0	0	0.216	0.213	0	0	0.134	0.128	0.111	0.142	0.044	0.115
	1700028I16Rik	1700028I16Rik|-|-|10|10 C1|ncRNA	NR_038042	0.025	0.015	0.0114	0.003	0.123762	0.357143	#DIV/0!	0.214286	0.0927422	0.822	1	0.0405344	0.949	0.969	-1.71	0.579	1	0.0234208	0.886	1	-1.21	0.689	1	1.56095	0.617743	1	0.036	0	0.039	0	0.034	0	0.026	0	0	0	0.057	0	0	0	0.018	0	0	0	0.202	0.042
	1700028J19Rik	1700028J19Rik|-|-|7|7 B3|ncRNA	NR_029436	0.210667	0.273	0.2564	0.301833	0.390123	0.404444	0.73467	0.400841	-0.348392	0.483	0.664	-0.516883	0.34	0.476	0.69	0.349	0.485	0.0535232	0.876	0.963	0.17	0.815	0.897	-0.0646201	0.921509	0.96661	0.275	0.2	0.157	0.049	0.212	0.44	0.391	0.33	0.405	0.305	0.126	0.116	0.016	0.512	0.422	0.182	0.332	0.347	0.54	0.675
	1700028K03Rik	1700028K03Rik|-|-|5|5 E5|protein-coding	NM_175241	0.765667	0.85175	0.6108	0.417333	0.584478	0.697584	0.566605	0.561687	-0.339333	0.238	0.422	0.035069	0.914	0.946	-0.67	0.0373	0.0838	-0.310336	0.261	0.619	-1.04	0.00117	0.00757	0.651422	0.0517722	0.191833	0.854	0.822	0.621	0.912	1.209	0.66	0.626	0.822	0.69	0.605	0.251	0.686	0.594	0.233	0.395	0.449	0.324	0.509	1.31	1.221
	1700028M03Rik	1700028M03Rik|-|-|3|3 E3|ncRNA	NR_036591	0	0	0	0	#DIV/0!	#DIV/0!	#DIV/0!	#DIV/0!	NA	1	1	NA	1	1	NA	1	1	NA	1	1	NA	1	1	NA	1	1	0	0	0	0	0	0	0	0	0	0	0	0	0	0	0	0	0	0	0	0
	1700028P14Rik	1700028P14Rik|AV209940|-|19|19 B|protein-coding	NM_026188	1.14767	0.785	0.6828	0.850667	1.54672	1.08726	0.664202	0.88152	0.321574	0.434	0.622	0.4649	0.327	0.463	-0.204	0.73	0.818	-0.100396	0.75	0.92	0.182	0.714	0.829	-0.29686	0.555561	0.752453	1.266	0.5	1.677	0.452	1.022	0.907	0.759	1.021	0.557	0.305	0.658	0.873	1.393	1.187	0.644	0.681	0.207	0.992	0.742	0.722
	1700028P15Rik	1700028P15Rik|-|-|2|2 H3|ncRNA	NR_040509	0	0	0	0	#DIV/0!	#DIV/0!	#DIV/0!	#DIV/0!	NA	1	1	NA	1	1	NA	1	1	NA	1	1	NA	1	1	NA	1	1	0	0	0	0	0	0	0	0	0	0	0	0	0	0	0	0	0	0	0	0
	1700029B22Rik	1700029B22Rik|-|-|7|7 F3|ncRNA	NR_040531	0	0	0	0	#DIV/0!	#DIV/0!	#DIV/0!	#DIV/0!	NA	1	1	NA	1	1	NA	1	1	NA	1	1	NA	1	1	NA	1	1	0	0	0	0	0	0	0	0	0	0	0	0	0	0	0	0	0	0	0	0
	1700029F12Rik	1700029F12Rik|-|-|13|13 D1|protein-coding	NR_104276	0	0	0	0	#DIV/0!	#DIV/0!	#DIV/0!	#DIV/0!	NA	1	1	NA	1	1	NA	1	1	NA	1	1	NA	1	1	NA	1	1	0	0	0	0	0	0	0	0	0	0	0	0	0	0	0	0	0	0	0	0
	1700029H14Rik	1700029H14Rik|-|-|8|8 A1.1|protein-coding	NM_001080781	0.027	0.0095	0	0	#DIV/0!	0.59375	#DIV/0!	#DIV/0!	0.15414	0.659	1	0.297681	0.586	1	-2.65	0.435	1	-0.0216425	0.873	1	-1.47	0.645	1	NA	1	1	0.081	0	0	0	0	0	0.038	0	0	0	0	0	0	0	0	0	0	0	0	0.016
	1700029I15Rik	1700029I15Rik|1700021K07Rik|-|2|2 E1|protein-coding	NM_183112	0.274333	0.36625	0.4892	0.3585	0.289076	0.741397	0.994309	0.655393	-0.28234	0.598	0.756	-0.788332	0.255	0.385	0.49	0.647	0.757	0.238803	0.484	0.794	-0.0778	0.921	0.956	0.635901	0.392182	0.632197	0.479	0	0.344	0.216	0.25	0.241	0.758	0.544	0.593	0.183	0.746	0.38	0.156	0	0.36	0.858	0.397	0.38	0.949	0.494
	1700029J03Rik	1700029J03Rik|-|-|16|16 C4|ncRNA	NR_040494	0	0	0	0	#DIV/0!	#DIV/0!	#DIV/0!	0	NA	1	1	NA	1	1	NA	1	1	NA	1	1	NA	1	1	NA	1	1	0	0	0	0	0	0	0	0	0	0	0	0	0	0	0	0	0	0	0	0
	1700029J07Rik	1700029J07Rik|-|-|8|8 B1.1|protein-coding	NM_001033148	0.285333	0.48	0.5732	0.608	0.469298	1.07623	1.76914	3.43503	-0.823429	0.0198	0.0705	-1.20591	0.000595	0.00206	1.29	0.000782	0.00301	0.278862	0.274	0.632	0.346	0.267	0.44	-0.00831407	0.977394	0.991461	0.336	0.165	0.355	0.505	0.578	0.508	0.329	0.786	0.429	0.42	0.556	0.675	0.857	0.526	0.696	0.677	0.405	0.487	0.608	0.446
	1700029M20Rik	1700029M20Rik|4930406E24Rik|-|4|4 D3|ncRNA	NR_027909	0.0176667	0.00375	0.0048	0.00216667	0.588889	0.46875	0.228571	0.433333	0.371754	0.364	1	0.42338	0.532	0.657	-2.6	0.309	1	0.0327381	0.813	1	-0.102	0.975	1	1.03459	0.741676	1	0	0.038	0.015	0	0	0.015	0	0	0	0	0	0.024	0	0	0	0	0.013	0	0.03	0.008
	1700029N11Rik	1700029N11Rik|-|-|13|13 A5|ncRNA	NR_045489	0	0	0	0	#DIV/0!	#DIV/0!	#DIV/0!	#DIV/0!	NA	1	1	NA	1	1	NA	1	1	NA	1	1	NA	1	1	NA	1	1	0	0	0	0	0	0	0	0	0	0	0	0	0	0	0	0	0	0	0	0
	1700029P11Rik	1700029P11Rik|-|-|15|15 E1|protein-coding	NM_025503	0	0	0	0	#DIV/0!	#DIV/0!	#DIV/0!	#DIV/0!	NA	1	1	NA	1	1	NA	1	1	NA	1	1	NA	1	1	NA	1	1	0	0	0	0	0	0	0	0	0	0	0	0	0	0	0	0	0	0	0	0
	1700030A11Rik	1700030A11Rik|-|-|17|17 A3.3|ncRNA	NR_045457	0	0.04975	0.0408	0.0136667	0	0.141738	0.245783	0.133987	-0.597072	0.157	1	-0.857966	0.2	0.319	1.91	0.588	1	-0.0367214	0.889	1	-1.84	0.265	1	1.70207	0.352457	1	0	0	0	0.066	0.041	0	0.092	0	0.06	0	0.067	0.077	0	0	0.042	0	0.04	0	0.337	0.351
	1700030C10Rik	1700030C10Rik|-|-|12|12 A1.2|ncRNA	NR_015521	0.094	0.052	0.0518	0.0548333	0.345588	0.224138	0.761765	0.480994	0.326828	0.542	0.712	0.26666	0.704	0.801	-0.664	0.505	0.637	0.0630738	0.835	0.95	-0.0304	0.978	0.989	0.270457	0.797041	0.901559	0.122	0.112	0.048	0.045	0.021	0	0.142	0	0.062	0.019	0.138	0.04	0	0	0.096	0.072	0.062	0.099	0.272	0.232
	1700030F04Rik	1700030F04Rik|-|-|6|6 F1|ncRNA	NR_045731	0	0.05225	0	0	0	0.967593	#DIV/0!	0	-0.142496	0.61	1	NA	1	1	NA	1	1	-0.0216425	0.873	1	-1.78	0.575	1	NA	1	1	0	0	0	0	0	0.209	0	0	0	0	0	0	0	0	0	0	0	0	0.103	0.054
	1700030F18Rik	1700030F18Rik|FAM186A|-|15|15 F1|protein-coding	NM_028180	0.035	0.03525	0	0	#DIV/0!	#DIV/0!	#DIV/0!	#DIV/0!	0.0108045	0.975	1	0.157285	0.772	1	-1.84	0.592	1	-0.0216425	0.873	1	-1.78	0.575	1	NA	1	1	0	0.105	0	0	0	0.141	0	0	0	0	0	0	0	0	0	0	0	0	0	0
	1700030J22Rik	1700030J22Rik|-|-|8|8 E1|protein-coding	NM_027103	2.141	0.988	0.7712	1.31217	0.542437	0.334688	0.290799	0.612304	0.860084	0.00499	0.0242	1.08871	1.22e-07	8.25e-07	-0.55	0.0168	0.043	-0.150113	0.567	0.842	0.389	0.201	0.365	-0.56345	0.011157	0.0701186	2.131	2.333	1.959	0.452	1.119	0.876	1.505	0.526	0.772	0.89	0.793	0.875	0.94	0.803	2.066	1.454	1.275	1.335	3.947	2.952
	1700030K09Rik	1700030K09Rik|-|-|8|8 B3.3|protein-coding	NM_028170	3.579	3.07925	2.7982	2.97433	0.787632	1.01726	1.00258	1.27326	0.0346164	0.859	0.923	0.0250952	0.885	0.928	-0.116	0.576	0.699	0.0115639	0.945	0.982	-0.0834	0.669	0.798	0.0953588	0.602972	0.786512	3.737	3.352	3.648	2.603	2.783	3.531	3.4	2.261	3.26	2.734	2.685	3.051	1.789	2.142	3.642	3.619	3.35	3.304	4.544	3.027
	1700030L20Rik	1700030L20Rik|-|-|3|3 G3|ncRNA	NR_040592	0	0	0	0	#DIV/0!	#DIV/0!	0	#DIV/0!	NA	1	1	NA	1	1	NA	1	1	NA	1	1	NA	1	1	NA	1	1	0	0	0	0	0	0	0	0	0	0	0	0	0	0	0	0	0	0	0	0
	1700030M09Rik	1700030M09Rik|-|-|8|8 E1|ncRNA	NR_045903	0.0143333	0	0	0.00316667	#DIV/0!	#DIV/0!	#DIV/0!	#DIV/0!	0.103793	0.71	1	0.0723736	0.893	1	-0.826	0.812	1	NA	1	1	0.619	0.848	1	0.335438	0.915169	1	0	0	0.043	0	0	0	0	0	0	0	0	0	0	0	0.019	0	0	0	0	0
	1700030N03Rik	1700030N03Rik|1700087C08Rik|-|19 A|19|ncRNA	NR_045304	0	0	0	0	#DIV/0!	#DIV/0!	#DIV/0!	#DIV/0!	NA	1	1	NA	1	1	NA	1	1	NA	1	1	NA	1	1	NA	1	1	0	0	0	0	0	0	0	0	0	0	0	0	0	0	0	0	0	0	0	0
	1700030O20Rik	1700030O20Rik|-|-|10|10 D2|ncRNA	NR_045345	0	0	0	0	#DIV/0!	#DIV/0!	#DIV/0!	#DIV/0!	NA	1	1	NA	1	1	NA	1	1	NA	1	1	NA	1	1	NA	1	1	0	0	0	0	0	0	0	0	0	0	0	0	0	0	0	0	0	0	0	0
	1700031A10Rik	1700031A10Rik|-|-|17|17 B1|ncRNA	NR_045439	0	0	0	0	#DIV/0!	#DIV/0!	#DIV/0!	#DIV/0!	NA	1	1	NA	1	1	NA	1	1	NA	1	1	NA	1	1	NA	1	1	0	0	0	0	0	0	0	0	0	0	0	0	0	0	0	0	0	0	0	0
	1700031F05Rik	1700031F05Rik|-|-|X|X D|protein-coding	NM_028496	0	0	0	0	#DIV/0!	#DIV/0!	#DIV/0!	#DIV/0!	NA	1	1	NA	1	1	NA	1	1	NA	1	1	NA	1	1	NA	1	1	0	0	0	0	0	0	0	0	0	0	0	0	0	0	0	0	0	0	0	0
	1700031L13Rik	1700031L13Rik|-|-|5|5 E1|ncRNA	NR_138557	0	0	0	0	#DIV/0!	#DIV/0!	#DIV/0!	#DIV/0!	NA	1	1	NA	1	1	NA	1	1	NA	1	1	NA	1	1	NA	1	1	0	0	0	0	0	0	0	0	0	0	0	0	0	0	0	0	0	0	0	0
	1700031M16Rik	1700031M16Rik|4930413L20Rik|-|15|15 F1|ncRNA	NR_015496	0	0.01325	0	0	#DIV/0!	0.490741	#DIV/0!	#DIV/0!	-0.0897196	0.748	1	NA	1	1	NA	1	1	0.00913838	0.946	1	-0.583	0.857	1	NA	1	1	0	0	0	0	0	0.053	0	0	0	0	0	0	0	0	0	0	0	0	0	0.027
	1700031P21Rik	1700031P21Rik|-|-|12|12 C1|ncRNA	NR_045910	0	0	0	0	#DIV/0!	#DIV/0!	#DIV/0!	#DIV/0!	NA	1	1	NA	1	1	NA	1	1	NA	1	1	NA	1	1	NA	1	1	0	0	0	0	0	0	0	0	0	0	0	0	0	0	0	0	0	0	0	0
	1700034E13Rik	1700034E13Rik|-|-|18|18 D1|protein-coding	NM_030097	0	0	0	0.0396667	#DIV/0!	#DIV/0!	#DIV/0!	#DIV/0!	NA	1	1	NA	1	1	2.74	0.434	1	NA	1	1	2.23	0.485	1	-1.26794	0.683664	1	0	0	0	0	0	0	0	0	0	0	0	0	0.238	0	0	0	0	0	0	0
	1700034G24Rik	1700034G24Rik|-|-|5|5 F|ncRNA	NR_045397	0.418	0.32125	0.376	0.439	0.277372	0.136412	0.175537	0.337692	0.138441	0.776	0.874	-0.244313	0.628	0.738	0.23	0.704	0.799	0.240464	0.484	0.794	0.421	0.532	0.694	0.0376326	0.947641	0.979393	0.402	0.576	0.276	0.074	0.446	0.166	0.599	0.093	0.306	0.377	0.712	0.392	0.43	0	0.671	0.531	0.512	0.49	1.507	2.355
	1700034H15Rik	1700034H15Rik|4930557M11Rik|BB016121|-|1|1 H6|ncRNA	NR_030669	0.228667	0.28325	0.4164	0.364333	0.403292	0.468182	0.580753	0.700641	-0.395458	0.276	0.466	-1.09198	0.00127	0.00406	0.803	0.0206	0.0511	0.546469	0.0546	0.268	0.346	0.312	0.491	0.355237	0.236455	0.476678	0.206	0.187	0.293	0.165	0.202	0.348	0.418	0.336	0.306	0.294	0.472	0.674	0.236	0.165	0.394	0.495	0.426	0.47	0.567	0.605
	1700034I23Rik	1700034I23Rik|-|-|3|3 B|pseudo	NR_045380	0	0.0065	0.0088	0.00266667	0	0.722222	#DIV/0!	#DIV/0!	-0.142496	0.61	1	-0.477866	0.4	1	1.66	0.638	1	0.08829	0.657	1	-0.262	0.927	1	1.4177	0.585144	1	0	0	0	0	0.008	0.018	0	0	0.023	0.021	0	0	0.016	0	0	0	0	0	0.018	0.009
	1700034J05Rik	1700034J05Rik|-|-|6|6 G3|protein-coding	NM_001164236	0.00366667	0.01575	0.0068	0.00733333	#DIV/0!	1.43182	0.453333	#DIV/0!	-0.289144	0.45	1	-0.15352	0.775	1	1.22	0.696	1	-0.072224	0.686	1	-1.02	0.629	1	-0.0321048	0.990372	1	0	0.011	0	0	0.009	0	0.054	0	0	0	0	0.034	0	0	0.027	0	0	0.017	0	0.011
	1700034K08Rik	1700034K08Rik|-|-|9|9 E3.3|ncRNA	NR_040756	0	0	0	0	#DIV/0!	#DIV/0!	#DIV/0!	#DIV/0!	NA	1	1	NA	1	1	NA	1	1	NA	1	1	NA	1	1	NA	1	1	0	0	0	0	0	0	0	0	0	0	0	0	0	0	0	0	0	0	0	0
	1700034O15Rik	1700034O15Rik|-|-|6|6 B2.1|protein-coding	NM_029671	0	0	0	0	#DIV/0!	#DIV/0!	#DIV/0!	#DIV/0!	NA	1	1	NA	1	1	NA	1	1	NA	1	1	NA	1	1	NA	1	1	0	0	0	0	0	0	0	0	0	0	0	0	0	0	0	0	0	0	0	0
	1700034P13Rik	1700034P13Rik|-|-|1|1 A2|ncRNA	NR_040462	1.55467	1.237	1.2494	1.269	0.640308	0.749243	0.607685	0.623281	0.139159	0.662	0.803	-0.0334369	0.899	0.937	-0.11	0.756	0.839	0.151275	0.567	0.841	0.0397	0.914	0.952	0.135777	0.664899	0.827243	1.358	1.702	1.604	0.821	1.637	1.686	0.804	0.72	1.179	1.419	1.279	1.65	1.671	0.685	1.301	1.261	1.963	0.733	2.428	1.651
	1700036G14Rik	1700036G14Rik|-|-|3|3 F1|ncRNA	NR_040542	0	0	0	0.00566667	#DIV/0!	#DIV/0!	#DIV/0!	#DIV/0!	NA	1	1	NA	1	1	1.13	0.75	1	NA	1	1	0.619	0.848	1	0.335438	0.915169	1	0	0	0	0	0	0	0	0	0	0	0	0	0	0	0.034	0	0	0	0	0
	1700037C18Rik	1700037C18Rik|2810022L20Rik|-|16|16 A1|protein-coding	NM_028484	3.45233	2.2605	2.4124	4.25417	0.868293	0.586077	0.522957	0.829596	0.408599	0.185	0.357	0.185325	0.522	0.648	0.512	0.215	0.34	0.206176	0.446	0.774	0.954	0.0164	0.0605	-0.699629	0.0527039	0.193855	2.815	3.523	4.019	1.493	1.659	2.301	3.589	1.43	2.389	1.802	3.19	3.251	2.211	7.995	5.019	3.385	3.789	3.126	3.976	3.857
	1700037H04Rik	1700037H04Rik|-|-|2|2 F1|protein-coding	NM_026091	23.8177	12.9088	12.0302	22.7112	0.904171	0.348198	0.352141	0.448962	0.653438	0.0252	0.0847	0.64971	0.00373	0.0107	0.122	0.73	0.819	0.0392203	0.879	0.964	0.828	0.0254	0.0842	-0.778273	0.0111956	0.0702786	21.698	26.043	23.712	8.613	9.224	10.998	22.8	11.081	9.846	8.191	15.527	15.506	9.095	35.097	26.778	18.362	24.07	22.865	26.342	37.073
	1700039E22Rik	1700039E22Rik|-|-|19|19 C3|ncRNA	NR_045315	0	0	0	0	#DIV/0!	#DIV/0!	#DIV/0!	#DIV/0!	NA	1	1	NA	1	1	NA	1	1	NA	1	1	NA	1	1	NA	1	1	0	0	0	0	0	0	0	0	0	0	0	0	0	0	0	0	0	0	0	0
	1700040L02Rik	1700040L02Rik|-|-|10|10 B5.2|protein-coding	NM_028491	1.181	1.052	0.7466	0.977	3.40346	1.29557	0.707678	0.5	-0.00260778	0.994	0.997	0.328689	0.362	0.498	-0.0885	0.794	0.866	-0.276578	0.318	0.674	-0.0958	0.753	0.857	-0.253946	0.433561	0.663641	0.964	1.103	1.476	0.743	1.344	1.235	0.886	1.113	0.477	0.988	0.655	0.5	0.899	1.323	0.827	1.028	0.784	1.001	0.347	0.812
	1700041A01Rik	1700041A01Rik|-|-|5|5 E1|ncRNA	NR_126428	0	0	0	0	#DIV/0!	#DIV/0!	#DIV/0!	#DIV/0!	NA	1	1	NA	1	1	NA	1	1	NA	1	1	NA	1	1	NA	1	1	0	0	0	0	0	0	0	0	0	0	0	0	0	0	0	0	0	0	0	0
	1700041C23Rik	1700041C23Rik|-|-|9|9 B|ncRNA	NR_033784	0	0	0	0	#DIV/0!	#DIV/0!	#DIV/0!	#DIV/0!	NA	1	1	NA	1	1	NA	1	1	NA	1	1	NA	1	1	NA	1	1	0	0	0	0	0	0	0	0	0	0	0	0	0	0	0	0	0	0	0	0
	1700041M19Rik	1700041M19Rik|-|-|16|16 C3.1|ncRNA	NR_040573	0	0	0	0	#DIV/0!	#DIV/0!	#DIV/0!	#DIV/0!	NA	1	1	NA	1	1	NA	1	1	NA	1	1	NA	1	1	NA	1	1	0	0	0	0	0	0	0	0	0	0	0	0	0	0	0	0	0	0	0	0
	1700042G07Rik	1700042G07Rik|-|-|4|4 D1|protein-coding	NM_001099295	0	0	0	0	#DIV/0!	#DIV/0!	#DIV/0!	0	NA	1	1	NA	1	1	NA	1	1	NA	1	1	NA	1	1	NA	1	1	0	0	0	0	0	0	0	0	0	0	0	0	0	0	0	0	0	0	0	0
	1700042G15Rik	1700042G15Rik|-|-|4|4 B3|ncRNA	NR_038179	0	0	0	0	#DIV/0!	#DIV/0!	0	#DIV/0!	NA	1	1	NA	1	1	NA	1	1	NA	1	1	NA	1	1	NA	1	1	0	0	0	0	0	0	0	0	0	0	0	0	0	0	0	0	0	0	0	0
	1700042O10Rik	1700042O10Rik|-|-|11|11 A1|ncRNA	NR_045178	0.006	0	0.0112	0	#DIV/0!	#DIV/0!	0.4	#DIV/0!	0.0334247	0.905	1	-0.242346	0.655	1	-0.315	0.929	1	0.0844658	0.534	1	NA	1	1	2.04184	0.513887	1	0.018	0	0	0	0	0	0	0	0	0	0.056	0	0	0	0	0	0	0	0	0
	1700044C05Rik	1700044C05Rik|-|-|14|14 E4|ncRNA	NR_045624	0	0	0	0	#DIV/0!	#DIV/0!	#DIV/0!	#DIV/0!	NA	1	1	NA	1	1	NA	1	1	NA	1	1	NA	1	1	NA	1	1	0	0	0	0	0	0	0	0	0	0	0	0	0	0	0	0	0	0	0	0
	1700044K03Rik	1700044K03Rik|-|-|18|18 C|ncRNA	NR_033785	0	0	0	0	#DIV/0!	#DIV/0!	#DIV/0!	#DIV/0!	NA	1	1	NA	1	1	NA	1	1	NA	1	1	NA	1	1	NA	1	1	0	0	0	0	0	0	0	0	0	0	0	0	0	0	0	0	0	0	0	0
	1700045H11Rik	1700045H11Rik|-|-|4|4 E2|ncRNA	NR_040649	0	0	0	0	0	#DIV/0!	#DIV/0!	#DIV/0!	NA	1	1	NA	1	1	NA	1	1	NA	1	1	NA	1	1	NA	1	1	0	0	0	0	0	0	0	0	0	0	0	0	0	0	0	0	0	0	0.072	0
	1700046C09Rik	1700046C09Rik|-|-|11|11 A2|ncRNA	NR_045918	0	0	0	0	#DIV/0!	#DIV/0!	#DIV/0!	#DIV/0!	NA	1	1	NA	1	1	NA	1	1	NA	1	1	NA	1	1	NA	1	1	0	0	0	0	0	0	0	0	0	0	0	0	0	0	0	0	0	0	0	0
	1700047A11Rik	1700047A11Rik|4930554C15Rik|-|8|8 A2|ncRNA	NR_110583	0.0773333	0.15725	0.1598	0.162333	0.371795	1.09201	3.32917	2.19369	-0.443645	0.396	0.588	-0.603278	0.424	0.557	1.33	0.343	0.48	-0.0242074	0.938	0.98	0.128	0.905	0.947	-0.171464	0.874649	0.942917	0.031	0	0.201	0.316	0.058	0.211	0.044	0.476	0.173	0.053	0.097	0	0.457	0.246	0	0.1	0.116	0.055	0.208	0.144
	1700047E10Rik	1700047E10Rik|-|-|14 C1|14|ncRNA	NR_073363	0	0	0	0	#DIV/0!	#DIV/0!	#DIV/0!	#DIV/0!	NA	1	1	NA	1	1	NA	1	1	NA	1	1	NA	1	1	NA	1	1	0	0	0	0	0	0	0	0	0	0	0	0	0	0	0	0	0	0	0	0
	1700047G03Rik	1700047G03Rik|-|-|15|15 A1|ncRNA	NR_040447	0	0.00825	0.0164	0	#DIV/0!	#DIV/0!	#DIV/0!	#DIV/0!	-0.0897196	0.748	1	-0.296912	0.579	1	NA	1	1	0.0314126	0.817	1	-0.583	0.857	1	1.51548	0.6292	1	0	0	0	0	0	0	0.033	0	0	0	0	0.082	0	0	0	0	0	0	0	0
	1700047I17Rik2	1700047I17Rik2|-|-|12|12 C1|protein-coding	NM_001100116	0	0	0	0	#DIV/0!	#DIV/0!	#DIV/0!	#DIV/0!	NA	1	1	NA	1	1	NA	1	1	NA	1	1	NA	1	1	NA	1	1	0	0	0	0	0	0	0	0	0	0	0	0	0	0	0	0	0	0	0	0
	1700047L14Rik	1700047L14Rik|-|-|5|5 F|ncRNA	NR_040691	0	0	0	0	#DIV/0!	#DIV/0!	#DIV/0!	#DIV/0!	NA	1	1	NA	1	1	NA	1	1	NA	1	1	NA	1	1	NA	1	1	0	0	0	0	0	0	0	0	0	0	0	0	0	0	0	0	0	0	0	0
	1700047M11Rik	1700047M11Rik|-|-|1|1 H5|ncRNA	NR_015458	0.121333	1.51725	2.8988	1.90267	0.487282	1.41799	1.81971	1.3475	-2.4547	8.85e-07	1.88e-05	-4.24841	2.39e-18	5.2e-17	4.16	5.1e-12	7.46e-11	0.664659	0.0462	0.242	0.344	0.51	0.675	0.733581	0.0519241	0.192174	0.084	0.22	0.06	0.199	1.416	2.027	2.427	2.996	1.713	1.534	2.96	5.291	0.657	2.376	2.32	2.252	1.565	2.246	0.249	1.07
	1700048M11Rik	1700048M11Rik|Gm15980|OTTMUSG00000028549|-|16|16 C4|ncRNA	NR_045300	0.0263333	0.091	0	0.163333	0.0595777	0.32852	0	#DIV/0!	-0.346445	0.428	1	0.0372416	0.945	1	3.01	0.167	0.282	-0.152235	0.387	1	1.13	0.493	0.66	-3.30507	0.12781	1	0.079	0	0	0	0.037	0.27	0.057	0	0	0	0	0	0.039	0.864	0.077	0	0	0	0.442	0.277
	1700048O20Rik	1700048O20Rik|1700022O21Rik|-|9|9 F4|ncRNA	NR_033553	2.22067	2.1325	2.881	2.91733	0.75124	0.791574	0.929055	0.952443	-0.111261	0.645	0.79	-0.676656	0.00821	0.0213	0.572	0.0299	0.0698	0.511323	0.0218	0.153	0.45	0.0584	0.155	0.130126	0.592429	0.778505	1.844	2.437	2.381	1.854	1.742	2.468	2.466	2.277	2.542	2.099	3.893	3.594	2.235	3.261	3.455	2.256	3.852	2.445	2.956	2.694
	1700049E15Rik	1700049E15Rik|Gm15761|OTTMUSG00000026044|-|6 G3|6|ncRNA	NR_033636	0.015	0	0	0	#DIV/0!	#DIV/0!	#DIV/0!	0	0.103793	0.71	1	0.0723736	0.893	1	-1.31	0.707	1	NA	1	1	NA	1	1	NA	1	1	0	0	0.045	0	0	0	0	0	0	0	0	0	0	0	0	0	0	0	0	0
	1700049E22Rik	1700049E22Rik|-|-|6|6 D3|ncRNA	NR_040525	0	0	0	0	#DIV/0!	#DIV/0!	#DIV/0!	#DIV/0!	NA	1	1	NA	1	1	NA	1	1	NA	1	1	NA	1	1	NA	1	1	0	0	0	0	0	0	0	0	0	0	0	0	0	0	0	0	0	0	0	0
	1700049L16Rik	1700049L16Rik|-|-|10|10 B5.3|pseudo	NR_003644	0	0	0.0222	0	#DIV/0!	#DIV/0!	#DIV/0!	#DIV/0!	NA	1	1	-0.417814	0.441	1	NA	1	1	0.101859	0.456	1	NA	1	1	2.37466	0.446691	1	0	0	0	0	0	0	0	0	0	0	0.111	0	0	0	0	0	0	0	0	0
	1700051A21Rik	1700051A21Rik|-|-|11|11 B4|ncRNA	NR_045922	0.246	0.12925	0.097	0.132167	1.11818	0.493321	0.248082	0.539456	0.473641	0.352	0.545	0.855525	0.173	0.284	-0.722	0.266	0.399	-0.173932	0.611	0.859	-0.00689	0.991	0.996	-0.398951	0.532256	0.736724	0.408	0.254	0.076	0.086	0.106	0.064	0.261	0.144	0.039	0.085	0.066	0.151	0.069	0.084	0.177	0.182	0.105	0.176	0.22	0.262
	1700052I22Rik	1700052I22Rik|-|-|12|12 C3|ncRNA	NR_033786	0	0	0	0	#DIV/0!	#DIV/0!	#DIV/0!	#DIV/0!	NA	1	1	NA	1	1	NA	1	1	NA	1	1	NA	1	1	NA	1	1	0	0	0	0	0	0	0	0	0	0	0	0	0	0	0	0	0	0	0	0
	1700052K11Rik	1700052K11Rik|AI840954|-|11|11 E1|ncRNA	NR_027956	2.053	1.47075	1.922	1.85467	0.791442	0.553746	0.807224	0.712511	0.276473	0.251	0.438	-0.242617	0.217	0.34	0.038	0.87	0.916	0.482916	0.02	0.145	0.326	0.176	0.334	0.210385	0.307779	0.5567	2.256	2.032	1.871	1.111	1.688	1.132	1.952	1.699	1.545	1.917	2.382	2.067	2.103	1.269	2.594	1.903	1.405	1.854	2.594	2.656
	1700054A03Rik	1700054A03Rik|-|-|19|19 D2|ncRNA	NR_045320	0.118	0.00625	0.0084	0.0356667	0.538813	0.215517	#DIV/0!	#DIV/0!	0.822264	0.0818	1	0.910954	0.213	0.335	-1.55	0.299	0.434	0.0443472	0.744	1	1.85	0.391	1	-0.777587	0.721319	1	0.025	0.249	0.08	0.025	0	0	0	0	0	0.042	0	0	0	0.097	0.071	0	0.046	0	0.219	0.029
	1700054K19Rik	1700054K19Rik|-|-|6|6 E3|ncRNA	NR_027865	0	0	0	0	#DIV/0!	#DIV/0!	#DIV/0!	#DIV/0!	NA	1	1	NA	1	1	NA	1	1	NA	1	1	NA	1	1	NA	1	1	0	0	0	0	0	0	0	0	0	0	0	0	0	0	0	0	0	0	0	0
	1700054M17Rik	1700054M17Rik|-|-|2|2 E5|ncRNA	NR_045919	0	0.0245	0	0	0	#DIV/0!	#DIV/0!	#DIV/0!	-0.0897196	0.748	1	NA	1	1	NA	1	1	0.00913838	0.946	1	-0.583	0.857	1	NA	1	1	0	0	0	0	0	0.098	0	0	0	0	0	0	0	0	0	0	0	0	0.096	0
	1700055C04Rik	1700055C04Rik|-|-|9|9 C|ncRNA	NR_040726	0	0	0	0	#DIV/0!	#DIV/0!	#DIV/0!	#DIV/0!	NA	1	1	NA	1	1	NA	1	1	NA	1	1	NA	1	1	NA	1	1	0	0	0	0	0	0	0	0	0	0	0	0	0	0	0	0	0	0	0	0
	1700056E22Rik	1700056E22Rik|-|-|1|1 H5|protein-coding	NM_028516	0.185333	0.25525	0.202	0.154833	1.04708	3.69928	2.19565	0.9862	-0.445123	0.363	0.557	-0.353563	0.553	0.674	-0.124	0.867	0.914	-0.109659	0.747	0.919	-0.759	0.205	0.369	0.565464	0.36858	0.610754	0.099	0.201	0.256	0.262	0.167	0.225	0.367	0.101	0.166	0.204	0.185	0.354	0.039	0.157	0.287	0.192	0.148	0.106	0.177	0.069
	1700057G04Rik	1700057G04Rik|-|-|9|9 E3.3|protein-coding	NM_001033184	0	0	0	0	#DIV/0!	#DIV/0!	#DIV/0!	#DIV/0!	NA	1	1	NA	1	1	NA	1	1	NA	1	1	NA	1	1	NA	1	1	0	0	0	0	0	0	0	0	0	0	0	0	0	0	0	0	0	0	0	0
	1700057H15Rik	1700057H15Rik|-|-|4|4 D2.2|ncRNA	NR_040774	0	0	0	0.00633333	#DIV/0!	#DIV/0!	#DIV/0!	#DIV/0!	NA	1	1	NA	1	1	1.66	0.638	1	NA	1	1	1.15	0.72	1	-0.199571	0.949398	1	0	0	0	0	0	0	0	0	0	0	0	0	0.038	0	0	0	0	0	0	0
	1700057H21Rik	1700057H21Rik|-|-|2|2 C1.1|ncRNA	NR_130155	0.0546667	0	0	0	#DIV/0!	#DIV/0!	#DIV/0!	#DIV/0!	0.211199	0.456	1	0.238007	0.662	1	-2.31	0.497	1	NA	1	1	NA	1	1	NA	1	1	0	0	0.164	0	0	0	0	0	0	0	0	0	0	0	0	0	0	0	0	0
	1700060C16Rik	1700060C16Rik|-|-|6|6 G3|ncRNA	NR_045732	0	0	0	0	#DIV/0!	#DIV/0!	#DIV/0!	#DIV/0!	NA	1	1	NA	1	1	NA	1	1	NA	1	1	NA	1	1	NA	1	1	0	0	0	0	0	0	0	0	0	0	0	0	0	0	0	0	0	0	0	0
	1700060C20Rik	1700060C20Rik|-|-|2|2 H1|ncRNA	NR_036606	0.0243333	0.01925	0.0182	0.0188333	#DIV/0!	#DIV/0!	#DIV/0!	#DIV/0!	-0.00255787	0.994	1	-0.0347662	0.949	1	-0.238	0.938	1	0.0112454	0.943	1	-0.267	0.912	1	0.495717	0.858121	1	0	0.073	0	0	0.031	0	0.046	0	0.091	0	0	0	0	0	0	0.052	0.061	0	0	0
	1700061F12Rik	1700061F12Rik|-|-|2|2 A1|ncRNA	NR_038180	0	0	0	0	#DIV/0!	#DIV/0!	#DIV/0!	#DIV/0!	NA	1	1	NA	1	1	NA	1	1	NA	1	1	NA	1	1	NA	1	1	0	0	0	0	0	0	0	0	0	0	0	0	0	0	0	0	0	0	0	0
	1700061G19Rik	1700061G19Rik|1700026H02|AI507598|-|17|17 D|protein-coding	NM_030141	0.12	0.02925	0.0378	0.101167	0.430108	0.169075	0.174194	0.911411	1.18054	0.0209	0.0733	0.89081	0.161	0.267	-0.0534	0.94	0.963	0.226516	0.487	0.797	1.77	0.023	0.0781	-1.11719	0.154106	0.375282	0.117	0.15	0.093	0.032	0.022	0.018	0.045	0	0.022	0.074	0.037	0.056	0.023	0.248	0.091	0.088	0.059	0.098	0.279	0.173
	1700061I17Rik	1700061I17Rik|-|-|3|3 G1|ncRNA	NR_038029	0	0	0	0	#DIV/0!	0	#DIV/0!	#DIV/0!	NA	1	1	NA	1	1	NA	1	1	NA	1	1	NA	1	1	NA	1	1	0	0	0	0	0	0	0	0	0	0	0	0	0	0	0	0	0	0	0	0.011
	1700061J23Rik	1700061J23Rik|-|-|11|11 A3.2|ncRNA	NR_131065	0	0	0	0	#DIV/0!	#DIV/0!	#DIV/0!	#DIV/0!	NA	1	1	NA	1	1	NA	1	1	NA	1	1	NA	1	1	NA	1	1	0	0	0	0	0	0	0	0	0	0	0	0	0	0	0	0	0	0	0	0
	1700063A18Rik	1700063A18Rik|-|-|1|1 D|ncRNA	NR_040467	0	0	0	0	#DIV/0!	#DIV/0!	#DIV/0!	#DIV/0!	NA	1	1	NA	1	1	NA	1	1	NA	1	1	NA	1	1	NA	1	1	0	0	0	0	0	0	0	0	0	0	0	0	0	0	0	0	0	0	0	0
	1700063D05Rik	1700063D05Rik|-|-|9|9 A5.1|ncRNA	NR_040392	1.30533	2.0315	2.4488	1.524	4.3223	4.30403	4.87809	1.61612	-0.744198	0.0278	0.0912	-1.16807	0.000823	0.00276	0.454	0.366	0.503	0.310556	0.28	0.637	-0.389	0.394	0.572	0.793379	0.0651253	0.223481	1.139	1.343	1.434	2.592	1.452	1.415	2.667	1.248	3.101	1.607	3.087	3.201	1.303	3.167	1.887	1.006	0.811	0.97	0.302	0.472
	1700063O14Rik	1700063O14Rik|-|-|5|5 E2|ncRNA	NR_045383	0	0	0	0	#DIV/0!	#DIV/0!	0	#DIV/0!	NA	1	1	NA	1	1	NA	1	1	NA	1	1	NA	1	1	NA	1	1	0	0	0	0	0	0	0	0	0	0	0	0	0	0	0	0	0	0	0	0
	1700064J06Rik	1700064J06Rik|-|-|10|10 D2|ncRNA	NR_045348	0	0	0	0	#DIV/0!	#DIV/0!	#DIV/0!	#DIV/0!	NA	1	1	NA	1	1	NA	1	1	NA	1	1	NA	1	1	NA	1	1	0	0	0	0	0	0	0	0	0	0	0	0	0	0	0	0	0	0	0	0
	1700064M15Rik	1700064M15Rik|-|-|12|12 E|ncRNA	NR_045288	0.0966667	0.077	0.145	0.0745	0.36478	0.557971	1.05839	1.06429	0.0512143	0.919	0.959	-0.434387	0.561	0.682	-0.265	0.844	0.899	0.18564	0.501	0.806	-0.0855	0.952	0.974	1.05643	0.386404	0.626907	0.03	0.1	0.16	0	0.139	0	0.169	0.304	0.083	0	0.232	0.106	0	0.176	0.057	0.048	0.166	0	0.265	0.138
	1700065D16Rik	1700065D16Rik|-|-|9|9 E3.3|protein-coding	NR_073361	0.335667	0.149	0.1004	0.180667	3.07951	2.61404	0.664901	2.34632	0.386799	0.464	0.648	0.589365	0.433	0.566	-0.785	0.473	0.607	-0.068715	0.797	1	1.86	0.139	0.285	-0.603667	0.624154	1	0.637	0	0.37	0.299	0.046	0.111	0.14	0	0.273	0	0.229	0	0.288	0	0.284	0.158	0.091	0.263	0.109	0.057
	1700065I16Rik	1700065I16Rik|1700084L08Rik|-|15 D1|15|pseudo	NR_040315	0	0	0	0	#DIV/0!	#DIV/0!	#DIV/0!	#DIV/0!	NA	1	1	NA	1	1	NA	1	1	NA	1	1	NA	1	1	NA	1	1	0	0	0	0	0	0	0	0	0	0	0	0	0	0	0	0	0	0	0	0
	1700065J11Rik	1700065J11Rik|-|-|6|6 B1|ncRNA	NR_040526	0	0	0	0	#DIV/0!	#DIV/0!	#DIV/0!	#DIV/0!	NA	1	1	NA	1	1	NA	1	1	NA	1	1	NA	1	1	NA	1	1	0	0	0	0	0	0	0	0	0	0	0	0	0	0	0	0	0	0	0	0
	1700065J18Rik	1700065J18Rik|-|-|1|1 H6|ncRNA	NR_040468	0.083	0.01125	0.0266	0.0905	#DIV/0!	0.0338855	0.180952	0.266962	0.288132	0.432	1	0.248606	0.703	0.8	0.178	0.931	0.958	0.0362764	0.789	1	2.13	0.381	1	-1.21116	0.607757	1	0.095	0	0.154	0	0.045	0	0	0	0.133	0	0	0	0	0	0.276	0	0.267	0	0	0.332
	1700065L07Rik	1700065L07Rik|-|-|6|6 C1|ncRNA	NR_108032	0	0	0	0	#DIV/0!	#DIV/0!	0	#DIV/0!	NA	1	1	NA	1	1	NA	1	1	NA	1	1	NA	1	1	NA	1	1	0	0	0	0	0	0	0	0	0	0	0	0	0	0	0	0	0	0	0	0
	1700065O20Rik	1700065O20Rik|-|-|18|18 D1|ncRNA	NR_045386	0	0	0	0	#DIV/0!	#DIV/0!	#DIV/0!	#DIV/0!	NA	1	1	NA	1	1	NA	1	1	NA	1	1	NA	1	1	NA	1	1	0	0	0	0	0	0	0	0	0	0	0	0	0	0	0	0	0	0	0	0
	1700066B17Rik	1700066B17Rik|-|-|1|1 B|ncRNA	NR_040465	0	0	0	0	#DIV/0!	#DIV/0!	#DIV/0!	#DIV/0!	NA	1	1	NA	1	1	NA	1	1	NA	1	1	NA	1	1	NA	1	1	0	0	0	0	0	0	0	0	0	0	0	0	0	0	0	0	0	0	0	0
	1700066B19Rik	1700066B19Rik|-|-|18|18 B2|protein-coding	NM_001033168	0.019	0.024	0.0118	0.014	#DIV/0!	0.888889	0.491667	0.466667	-0.16521	0.74	0.854	0.196494	0.789	0.863	-0.249	0.872	0.918	-0.153188	0.536	1	-0.79	0.553	0.711	-0.248444	0.871057	1	0.031	0.026	0	0	0.014	0.017	0.065	0.039	0	0.02	0	0	0	0.03	0.015	0.025	0.014	0	0	0.027
	1700066J03Rik	1700066J03Rik|-|-|13|13 B1|ncRNA	NR_126543	0.0133333	0	0	0	#DIV/0!	#DIV/0!	#DIV/0!	#DIV/0!	0.0334247	0.905	1	-0.0715375	0.894	1	-0.315	0.929	1	NA	1	1	NA	1	1	NA	1	1	0	0	0.04	0	0	0	0	0	0	0	0	0	0	0	0	0	0	0	0	0
	1700066M21Rik	1700066M21Rik|AI428479|-|1|1 C1.3|protein-coding	NM_028546	6.787	7.314	7.1738	4.18683	0.779846	0.795778	0.722655	0.594552	-0.292822	0.0494	0.14	-0.396995	0.0101	0.0256	-0.497	0.0688	0.138	0.100611	0.474	0.788	-0.799	0.00104	0.00689	0.909556	5.94e-05	0.00160565	6.861	7.078	6.422	6.769	7.497	7.459	7.531	8.157	7.695	7.245	5.701	7.071	6.29	2.756	3.552	4.257	3.754	4.512	8.703	9.191
	1700066N21Rik	1700066N21Rik|-|-|5|5 E1|ncRNA	NR_045924	0	0	0	0	#DIV/0!	#DIV/0!	#DIV/0!	#DIV/0!	NA	1	1	NA	1	1	NA	1	1	NA	1	1	NA	1	1	NA	1	1	0	0	0	0	0	0	0	0	0	0	0	0	0	0	0	0	0	0	0	0
	1700066O22Rik	1700066O22Rik|4930500F21Rik|4930515O13Rik|4930542C11Rik|-|18|18 D3|ncRNA	NR_015541	0	0	0	0	#DIV/0!	#DIV/0!	#DIV/0!	#DIV/0!	NA	1	1	NA	1	1	NA	1	1	NA	1	1	NA	1	1	NA	1	1	0	0	0	0	0	0	0	0	0	0	0	0	0	0	0	0	0	0	0	0
	1700067G17Rik	1700067G17Rik|-|-|1|1 D|ncRNA	NR_040471	0	0	0	0	#DIV/0!	#DIV/0!	#DIV/0!	#DIV/0!	NA	1	1	NA	1	1	NA	1	1	NA	1	1	NA	1	1	NA	1	1	0	0	0	0	0	0	0	0	0	0	0	0	0	0	0	0	0	0	0	0
	1700067K01Rik	1700067K01Rik|-|-|8|8 C2|protein-coding	NM_183097	0.019	0.04375	0.1334	0.18	0.0801688	0.212379	1.21273	0.534125	-0.260681	0.562	1	-1.29878	0.0855	0.159	3.38	0.00356	0.0114	0.368613	0.193	0.541	2.24	0.0131	0.0509	-0.235447	0.787365	0.895975	0	0	0.057	0.018	0	0.081	0.076	0	0.346	0	0.194	0.127	0.087	0.211	0.36	0.229	0.066	0.127	0.237	0.206
	1700067P10Rik	1700067P10Rik|-|-|17|17 C|protein-coding	NM_026625	0	0	0	0	0	#DIV/0!	0	0	NA	1	1	NA	1	1	NA	1	1	NA	1	1	NA	1	1	NA	1	1	0	0	0	0	0	0	0	0	0	0	0	0	0	0	0	0	0	0	0.054	0
	1700069L16Rik	1700069L16Rik|1700096P12Rik|-|5|5 F|ncRNA	NR_033216	0	0	0	0	#DIV/0!	#DIV/0!	#DIV/0!	#DIV/0!	NA	1	1	NA	1	1	NA	1	1	NA	1	1	NA	1	1	NA	1	1	0	0	0	0	0	0	0	0	0	0	0	0	0	0	0	0	0	0	0	0
	1700069P05Rik	1700069P05Rik|-|-|6|6 F1|ncRNA	NR_040527	0.0183333	0	0	0	#DIV/0!	#DIV/0!	#DIV/0!	#DIV/0!	0.103793	0.71	1	0.0642719	0.905	1	-1.25	0.719	1	NA	1	1	NA	1	1	NA	1	1	0	0.055	0	0	0	0	0	0	0	0	0	0	0	0	0	0	0	0	0	0
	1700071K01Rik	1700071K01Rik|-|-|11|11 B5|protein-coding	NM_001033765	0.0123333	0	0.059	0	#DIV/0!	0	2.10714	#DIV/0!	0.103793	0.71	1	-0.747533	0.294	0.428	-1.08	0.759	1	0.223128	0.222	1	NA	1	1	3.75285	0.13308	1	0.037	0	0	0	0	0	0	0.094	0	0	0.201	0	0	0	0	0	0	0	0	0.15
	1700071M16Rik	1700071M16Rik|-|-|17|17 B3|ncRNA	NR_045445	58.441	58.9228	72.4742	82.9643	15.6259	10.6763	6.4976	4.67457	-0.19901	0.485	0.665	-0.623764	0.00209	0.00635	0.701	0.00172	0.00604	0.36294	0.132	0.449	0.481	0.0882	0.208	-0.058483	0.776017	0.890958	52.693	66.143	56.487	66.755	79.468	59.549	29.919	77.993	59.706	103.518	57.587	63.567	99.869	76.932	90.096	95.855	67.163	67.871	3.74	5.519
	1700072B07Rik	1700072B07Rik|-|-|9|9 B|ncRNA	NR_040727	0	0	0	0	#DIV/0!	#DIV/0!	#DIV/0!	#DIV/0!	NA	1	1	NA	1	1	NA	1	1	NA	1	1	NA	1	1	NA	1	1	0	0	0	0	0	0	0	0	0	0	0	0	0	0	0	0	0	0	0	0
	1700072I22Rik	1700072I22Rik|-|-|11|11 E1|ncRNA	NR_131143	0	0	0	0.004	#DIV/0!	#DIV/0!	0	0.210526	NA	1	1	NA	1	1	1.13	0.75	1	NA	1	1	0.619	0.848	1	0.335438	0.915169	1	0	0	0	0	0	0	0	0	0	0	0	0	0	0	0.024	0	0	0	0	0
	1700072O05Rik	1700072O05Rik|-|-|6|6 F1|ncRNA	NR_045733	0	0	0	0	#DIV/0!	#DIV/0!	#DIV/0!	#DIV/0!	NA	1	1	NA	1	1	NA	1	1	NA	1	1	NA	1	1	NA	1	1	0	0	0	0	0	0	0	0	0	0	0	0	0	0	0	0	0	0	0	0
	1700073E17Rik	1700073E17Rik|-|-|6|6 G3|pseudo	NR_003625	0.0103333	0.01025	0.0042	0.00916667	0.54386	0.301471	0.323077	0.705128	-0.034634	0.944	0.972	0.422647	0.54	0.663	0.0642	0.965	0.978	-0.166237	0.444	1	-0.0621	0.962	0.98	-1.61705	0.326263	1	0.012	0.019	0	0	0.016	0.019	0.006	0.021	0	0	0	0	0.004	0.033	0.004	0.007	0	0.007	0.019	0.034
	1700074H08Rik	1700074H08Rik|CH25-211A23.1|-|13 D2.3|13|ncRNA	NR_138420	0	0	0	0	#DIV/0!	#DIV/0!	#DIV/0!	#DIV/0!	NA	1	1	NA	1	1	NA	1	1	NA	1	1	NA	1	1	NA	1	1	0	0	0	0	0	0	0	0	0	0	0	0	0	0	0	0	0	0	0	0
	1700074P13Rik	1700074P13Rik|AV047902|Tryx5|-|6|6 B1|protein-coding	NM_028550	0	0	0	0	#DIV/0!	#DIV/0!	#DIV/0!	#DIV/0!	NA	1	1	NA	1	1	NA	1	1	NA	1	1	NA	1	1	NA	1	1	0	0	0	0	0	0	0	0	0	0	0	0	0	0	0	0	0	0	0	0
	1700080E11Rik	1700080E11Rik|AI429110|Tseg8|-|9|9 F1|protein-coding	NM_028562	0	0	0	0	#DIV/0!	#DIV/0!	#DIV/0!	#DIV/0!	NA	1	1	NA	1	1	NA	1	1	NA	1	1	NA	1	1	NA	1	1	0	0	0	0	0	0	0	0	0	0	0	0	0	0	0	0	0	0	0	0
	1700080N15Rik	1700080N15Rik|4933408D14Rik|-|2|2 A1|ncRNA	NR_040500	0.0636667	0.0105	0	0	#DIV/0!	#DIV/0!	#DIV/0!	#DIV/0!	0.182537	0.56	1	0.238007	0.662	1	-2.31	0.497	1	0.00913838	0.946	1	-0.583	0.857	1	NA	1	1	0	0	0.191	0	0.042	0	0	0	0	0	0	0	0	0	0	0	0	0	0	0
	1700080O16Rik	1700080O16Rik|-|-|X|X A5|protein-coding	NM_028851	0	0	0	0	#DIV/0!	#DIV/0!	#DIV/0!	#DIV/0!	NA	1	1	NA	1	1	NA	1	1	NA	1	1	NA	1	1	NA	1	1	0	0	0	0	0	0	0	0	0	0	0	0	0	0	0	0	0	0	0	0
	1700081H04Rik	1700081H04Rik|-|-|5|5 F|ncRNA	NR_040693	0	0	0	0	#DIV/0!	#DIV/0!	0	#DIV/0!	NA	1	1	NA	1	1	NA	1	1	NA	1	1	NA	1	1	NA	1	1	0	0	0	0	0	0	0	0	0	0	0	0	0	0	0	0	0	0	0	0
	1700083H02Rik	1700083H02Rik|100041190|Gm3190|-|12|12 C3|ncRNA	NR_136902	0	0	0	0	#DIV/0!	#DIV/0!	#DIV/0!	#DIV/0!	NA	1	1	NA	1	1	NA	1	1	NA	1	1	NA	1	1	NA	1	1	0	0	0	0	0	0	0	0	0	0	0	0	0	0	0	0	0	0	0	0
	1700084D21Rik	1700084D21Rik|-|-|13|13 D2.2|ncRNA	NR_131045	0	0	0	0	#DIV/0!	#DIV/0!	#DIV/0!	#DIV/0!	NA	1	1	NA	1	1	NA	1	1	NA	1	1	NA	1	1	NA	1	1	0	0	0	0	0	0	0	0	0	0	0	0	0	0	0	0	0	0	0	0
	1700084E18Rik	1700084E18Rik|-|-|2|2 B|ncRNA	NR_028299	0.466	0.3325	0.463	0.283	0.947154	0.810976	1.70221	1.15984	0.154061	0.771	0.87	-0.30433	0.612	0.726	-0.604	0.527	0.658	0.289937	0.397	0.741	-0.325	0.732	0.842	0.972999	0.209428	0.44742	0.485	0.199	0.714	0.269	0.621	0	0.44	0.225	0.369	0.492	0.756	0.473	0.086	0.262	0.341	0.142	0	0.867	0.492	0.41
	1700084F23Rik	1700084F23Rik|1700003E18Rik|4930589D02Rik|-|13|13 C1|ncRNA	NR_045965	0	0	0	0	#DIV/0!	#DIV/0!	#DIV/0!	#DIV/0!	NA	1	1	NA	1	1	NA	1	1	NA	1	1	NA	1	1	NA	1	1	0	0	0	0	0	0	0	0	0	0	0	0	0	0	0	0	0	0	0	0
	1700084J12Rik	1700084J12Rik|-|-|15|15 B3.1|pseudo	NR_033608	0	0	0	0	#DIV/0!	0	0	#DIV/0!	NA	1	1	NA	1	1	NA	1	1	NA	1	1	NA	1	1	NA	1	1	0	0	0	0	0	0	0	0	0	0	0	0	0	0	0	0	0	0	0	0.03
	1700084M14Rik	1700084M14Rik|-|-|X|X C2|pseudo	NR_126536	0	0	0	0	#DIV/0!	#DIV/0!	#DIV/0!	#DIV/0!	NA	1	1	NA	1	1	NA	1	1	NA	1	1	NA	1	1	NA	1	1	0	0	0	0	0	0	0	0	0	0	0	0	0	0	0	0	0	0	0	0
	1700085C21Rik	1700085C21Rik|-|-|12|12 D1|ncRNA	NR_046045	0.006	0	0.0056	0	#DIV/0!	0	#DIV/0!	#DIV/0!	0.0334247	0.905	1	-0.170398	0.751	1	-0.315	0.929	1	0.0614787	0.649	1	NA	1	1	1.51548	0.6292	1	0.018	0	0	0	0	0	0	0	0	0	0.028	0	0	0	0	0	0	0	0	0.021
	1700086L19Rik	1700086L19Rik|1700006L05Rik|AU016007|-|12|12 C3|ncRNA	NR_030735	22.0677	11.6152	6.3992	9.47317	0.624086	0.304798	0.203272	0.358425	0.683491	0.0251	0.0845	1.39254	1.69e-10	1.65e-09	-1.07	0.000107	0.000511	-0.562402	0.034	0.2	-0.319	0.333	0.512	-0.362383	0.164476	0.390418	24.063	24.368	17.772	5.384	11.402	10.207	19.468	4.071	7.187	7.463	7.745	5.53	5.605	6.492	17.391	8.957	9.892	8.502	35.36	38.108
	1700086O06Rik	1700086O06Rik|-|-|18|18 B3|ncRNA	NR_027904	1.482	1.65675	1.8274	2.3915	0.741371	0.620738	0.807155	0.828082	-0.314233	0.245	0.43	-0.601237	0.0502	0.102	0.895	0.0174	0.0443	0.249251	0.309	0.664	0.549	0.0941	0.217	-0.257914	0.441559	0.670369	1.419	1.285	1.742	1.525	1.425	1.702	1.975	1	2.41	1.386	2.009	2.332	1.615	4.067	2.648	2.104	2.254	1.661	1.999	2.669
	1700088E04Rik	1700088E04Rik|ESTJ0827E04|-|15 E1|15 37.7 cM|protein-coding	NM_001310576	10.7133	11.169	12.0168	12.8808	0.489283	1.0094	1.51155	1.81727	-0.209962	0.307	0.498	-0.440741	0.0193	0.0447	0.415	0.0615	0.126	0.220744	0.141	0.464	0.192	0.28	0.456	0.0398381	0.810924	0.909072	12.44	8.492	11.208	9.741	13.037	10.593	11.305	12.798	9.009	11.665	13.325	13.287	10.041	14.389	14.661	13.707	10.713	13.774	21.896	11.065
	1700091H14Rik	1700091H14Rik|100041930|Gm3578|-|14|14 B|ncRNA	NR_073362	0	0	0	0	#DIV/0!	#DIV/0!	#DIV/0!	#DIV/0!	NA	1	1	NA	1	1	NA	1	1	NA	1	1	NA	1	1	NA	1	1	0	0	0	0	0	0	0	0	0	0	0	0	0	0	0	0	0	0	0	0
	1700092C02Rik	1700092C02Rik|-|-|8|8 C1|ncRNA	NR_045467	0	0	0	0	#DIV/0!	0	#DIV/0!	#DIV/0!	NA	1	1	NA	1	1	NA	1	1	NA	1	1	NA	1	1	NA	1	1	0	0	0	0	0	0	0	0	0	0	0	0	0	0	0	0	0	0	0	0.062
	1700092C10Rik	1700092C10Rik|-|-|14|14 D2|ncRNA	NR_045931	0	0	0	0	#DIV/0!	#DIV/0!	#DIV/0!	#DIV/0!	NA	1	1	NA	1	1	NA	1	1	NA	1	1	NA	1	1	NA	1	1	0	0	0	0	0	0	0	0	0	0	0	0	0	0	0	0	0	0	0	0
	1700092E19Rik	1700092E19Rik|-|-|13|13 A3.1|ncRNA	NR_045933	0	0	0	0	#DIV/0!	#DIV/0!	#DIV/0!	#DIV/0!	NA	1	1	NA	1	1	NA	1	1	NA	1	1	NA	1	1	NA	1	1	0	0	0	0	0	0	0	0	0	0	0	0	0	0	0	0	0	0	0	0
	1700092K14Rik	1700092K14Rik|-|-|11|11 E2|ncRNA	NR_045930	0.0513333	0.069	0.0896	0.00783333	#DIV/0!	#DIV/0!	#DIV/0!	#DIV/0!	-0.11599	0.786	1	-0.517405	0.486	0.614	-1.34	0.688	1	0.107212	0.661	1	-1.9	0.47	1	2.61441	0.195012	1	0.049	0	0.105	0	0.137	0	0.139	0	0.136	0.084	0.228	0	0	0	0.047	0	0	0	0	0
	1700092M07Rik	1700092M07Rik|-|-|19|19 A|protein-coding	NM_001177347	0.410333	0.172	0.1736	0.143	1.81563	1.45763	2.22564	1.7875	0.536708	0.315	0.506	0.584986	0.43	0.564	-1.4	0.175	0.291	0.00579528	0.983	0.994	-0.412	0.713	0.829	0.441864	0.747896	1	0.559	0.343	0.329	0.207	0.191	0	0.29	0.519	0	0.349	0	0	0	0	0.245	0.246	0.095	0.272	0.226	0.118
	1700093K21Rik	1700093K21Rik|-|-|11|11 A3.2|protein-coding	NM_026105	0.00633333	0.0045	0	0.00516667	0.0736434	0.0288462	0	#DIV/0!	-0.0193514	0.945	1	-0.0715375	0.894	1	0.166	0.963	1	0.00913838	0.946	1	-0.102	0.975	1	0.335438	0.915169	1	0.019	0	0	0	0.018	0	0	0	0	0	0	0	0	0	0	0.031	0	0	0.086	0.156
	1700094D03Rik	1700094D03Rik|-|-|3|3 F1|protein-coding	NM_028567	0.461333	0.5965	0.456	0.903167	0.341728	0.769677	0.784854	1.1418	-0.401978	0.364	0.557	-0.220086	0.663	0.766	1.18	0.0287	0.0674	-0.15701	0.639	0.875	0.664	0.18	0.339	-0.922404	0.0561345	0.202351	0.537	0.16	0.687	0.144	0.667	0.827	0.748	1.01	0.103	0.361	0.453	0.353	1.532	0.954	0.776	0.887	0.265	1.005	1.35	0.775
	1700094J05Rik	1700094J05Rik|-|-|10|10 C1|ncRNA	NR_040580	0.406667	0.448	0.353	0.4795	1.18562	0.668657	0.594276	1.0873	-0.276019	0.527	0.7	-0.162552	0.765	0.846	0.415	0.562	0.687	-0.0840347	0.805	0.939	0.076	0.906	0.948	-0.246666	0.726147	0.862287	0.481	0.282	0.457	0.411	0.741	0.393	0.247	0	0.376	0.628	0.21	0.551	0.849	0	0.912	0.342	0.396	0.378	0.343	0.67
	1700094M24Rik	1700094M24Rik|-|-|6|6 B3|ncRNA	NR_046049	0	0	0	0	#DIV/0!	#DIV/0!	#DIV/0!	#DIV/0!	NA	1	1	NA	1	1	NA	1	1	NA	1	1	NA	1	1	NA	1	1	0	0	0	0	0	0	0	0	0	0	0	0	0	0	0	0	0	0	0	0
	1700095A21Rik	1700095A21Rik|-|-|4 E1|4|ncRNA	NR_045468	0	0	0	0	#DIV/0!	#DIV/0!	#DIV/0!	#DIV/0!	NA	1	1	NA	1	1	NA	1	1	NA	1	1	NA	1	1	NA	1	1	0	0	0	0	0	0	0	0	0	0	0	0	0	0	0	0	0	0	0	0
	1700095B10Rik	1700095B10Rik|-|-|5|5 F|ncRNA	NR_040675	0.665333	0.061	0.0382	0.0498333	0.905215	2.90476	#DIV/0!	#DIV/0!	1.98828	9.87e-05	0.00101	2.85778	9.73e-06	4.86e-05	-3.55	8.49e-05	0.000415	-0.133757	0.621	1	-0.465	0.736	0.845	-0.203248	0.889702	1	0.897	0.783	0.316	0.149	0.017	0	0.078	0	0	0.031	0.029	0.131	0	0	0.142	0.089	0.068	0	0.735	0.021
	1700095J12Rik	1700095J12Rik|-|-|4|4 D3|ncRNA	NR_126429	0	0.0145	0	0	#DIV/0!	#DIV/0!	#DIV/0!	#DIV/0!	-0.0897196	0.748	1	NA	1	1	NA	1	1	0.00913838	0.946	1	-0.583	0.857	1	NA	1	1	0	0	0	0	0	0.058	0	0	0	0	0	0	0	0	0	0	0	0	0	0
	1700096J18Rik	1700096J18Rik|-|-|11|11 E1|ncRNA	NR_027883	0	0.015	0	0.219167	0	0.306122	0	1.09583	-0.0897196	0.748	1	NA	1	1	4.97	0.00243	0.00818	0.00913838	0.946	1	3.72	0.00871	0.0375	-3.50999	0.0129164	1	0	0	0	0	0	0	0.06	0	0	0	0	0	0.124	0.669	0.163	0.204	0.079	0.076	0.094	0.049
	1700096K18Rik	1700096K18Rik|-|-|5|5 B1|ncRNA	NR_027388	1.17933	1.22375	1.5838	1.21183	0.891408	0.940623	1.06653	0.952699	-0.225497	0.394	0.587	-0.691848	0.0116	0.029	0.251	0.506	0.637	0.419184	0.055	0.268	0.00932	0.977	0.989	0.484259	0.122111	0.329126	1.029	1.143	1.366	1.207	1.288	1.197	1.203	1.752	1.875	1.155	1.439	1.698	2.069	0.966	1.185	0.766	1.059	1.226	1.323	1.301
	1700096P03Rik	1700096P03Rik|-|-|8|8 C3|ncRNA	NR_131165	0	0	0	0	#DIV/0!	#DIV/0!	#DIV/0!	#DIV/0!	NA	1	1	NA	1	1	NA	1	1	NA	1	1	NA	1	1	NA	1	1	0	0	0	0	0	0	0	0	0	0	0	0	0	0	0	0	0	0	0	0
	1700097N02Rik	1700097N02Rik|-|-|17|17 A3.3|ncRNA	NR_045287	0.177	0.008	0	0	0.194292	#DIV/0!	#DIV/0!	#DIV/0!	1.34169	0.0101	0.0418	1.69968	0.0237	0.0534	-4.67	0.00558	0.0168	0.00913838	0.946	1	-0.583	0.857	1	NA	1	1	0.182	0.153	0.196	0	0	0	0.032	0	0	0	0	0	0	0	0	0	0	0	0.911	0
	1700099I09Rik	1700099I09Rik|-|-|13|13 D1|ncRNA	NR_130171	0.356333	0.14425	0.309	0.344667	0.426236	0.312229	0.503257	1.55255	0.726275	0.156	0.319	-0.13186	0.812	0.879	0.158	0.83	0.889	0.686896	0.0449	0.239	1.28	0.0681	0.173	-0.0115501	0.984531	0.994841	0.234	0.633	0.202	0.143	0.154	0.213	0.067	0.239	0.196	0.362	0.329	0.419	0.574	0	0.498	0.265	0.438	0.293	0.836	0.462
	1700100I10Rik	1700100I10Rik|1700085D13Rik|4930481K08Rik|-|14|14 E4|ncRNA	NR_126549	0.00666667	0	0	0.0516667	#DIV/0!	#DIV/0!	#DIV/0!	#DIV/0!	0.0334247	0.905	1	-0.0715375	0.894	1	3.01	0.102	0.19	NA	1	1	3.48	0.0492	0.137	-2.53493	0.149103	1	0	0.02	0	0	0	0	0	0	0	0	0	0	0	0.035	0.017	0.029	0.133	0.096	0	0
	1700100L14Rik	1700100L14Rik|-|-|13|13 C1|ncRNA	NR_045934	0.028	0	0	0	#DIV/0!	#DIV/0!	#DIV/0!	#DIV/0!	0.154036	0.582	1	0.126554	0.815	1	-1.65	0.631	1	NA	1	1	NA	1	1	NA	1	1	0.084	0	0	0	0	0	0	0	0	0	0	0	0	0	0	0	0	0	0	0
	1700101I11Rik	1700101I11Rik|-|-|6|6 F3|ncRNA	NR_045270	0.224667	0.3745	0.6822	0.545333	0.176764	0.176401	0.338561	0.248217	-0.561115	0.277	0.467	-1.60151	0.00215	0.00651	1.44	0.00448	0.0139	0.516443	0.132	0.449	0.559	0.321	0.499	0.415921	0.343501	0.588053	0.309	0.16	0.205	0.048	0.402	0.269	0.779	0.85	0.53	0.245	0.852	0.934	0.303	0.658	0.689	0.536	0.577	0.509	1.271	2.123
	1700101O22Rik	1700101O22Rik|-|-|12|12 A1.1|ncRNA	NR_045045	0.0203333	0	0	0	#DIV/0!	#DIV/0!	#DIV/0!	#DIV/0!	0.0334247	0.905	1	-0.0715375	0.894	1	-0.315	0.929	1	NA	1	1	NA	1	1	NA	1	1	0	0	0.061	0	0	0	0	0	0	0	0	0	0	0	0	0	0	0	0	0
	1700102H20Rik	1700102H20Rik|-|-|17|17 A1|ncRNA	NR_045303	1.88167	1.45575	0.7246	0.956833	3.53697	2.02188	9.79189	12.7578	0.160976	0.674	0.81	0.890418	0.0526	0.106	-0.684	0.329	0.465	-0.540745	0.0924	0.368	-0.496	0.429	0.605	-0.297882	0.642963	0.813384	1.719	1.505	2.421	1.213	1.39	0.975	2.245	0.732	0.666	0.574	0.968	0.683	0.889	2.646	1.2	0.231	0.178	0.597	0.532	0.72
	1700102P08Rik	1700102P08Rik|AI593206|-|9|9 F2|protein-coding	NM_053216	0.357	0.1085	0.1688	0.130833	0.29553	0.16194	0.367756	0.948068	0.934095	0.0654	0.172	0.556441	0.312	0.448	-1.34	0.159	0.27	0.338119	0.323	0.679	0.0885	0.93	0.962	0.65651	0.441393	0.67018	0.332	0.531	0.208	0.213	0.131	0.04	0.05	0.089	0.244	0.195	0.191	0.125	0	0	0.27	0.169	0.065	0.281	1.208	0.67
	1700104L18Rik	1700104L18Rik|-|-|12|12 C1|ncRNA	NR_108033	0	0	0	0	#DIV/0!	#DIV/0!	#DIV/0!	#DIV/0!	NA	1	1	NA	1	1	NA	1	1	NA	1	1	NA	1	1	NA	1	1	0	0	0	0	0	0	0	0	0	0	0	0	0	0	0	0	0	0	0	0
	1700105P06Rik	1700105P06Rik|-|-|19|19 A|ncRNA	NR_045703	0.062	0.05825	0.0686	0.0226667	0.13449	0.728125	1.29434	0.839506	-0.0176953	0.969	1	-0.184559	0.8	0.87	-1.62	0.603	0.722	0.084238	0.753	1	-1.7	0.386	1	2.12366	0.276181	1	0	0	0.186	0.07	0.065	0	0.098	0	0	0.059	0.161	0.123	0	0.136	0	0	0	0	0.461	0.08
	1700108F19Rik	1700108F19Rik|1700020I02Rik|BB065030|-|14|14 D3|ncRNA	NR_015485	0.0556667	0.01325	0.0146	0.00716667	#DIV/0!	#DIV/0!	#DIV/0!	0.421569	0.446588	0.337	1	0.377493	0.609	0.723	-2.03	0.339	1	0.0652683	0.718	1	-0.261	0.93	1	1.07208	0.709661	1	0.044	0.075	0.048	0	0.021	0	0.032	0	0	0.038	0.035	0	0.043	0	0	0	0	0	0	0
	1700108J01Rik	1700108J01Rik|-|-|14|14 E5|ncRNA	NR_015532	0.0443333	0	0	0.0128333	#DIV/0!	#DIV/0!	#DIV/0!	#DIV/0!	0.174951	0.533	1	0.166465	0.759	1	-1.42	0.68	1	NA	1	1	0.619	0.848	1	0.335438	0.915169	1	0	0	0.133	0	0	0	0	0	0	0	0	0	0	0	0	0	0.077	0	0	0
	1700109G14Rik	1700109G14Rik|1700126G13Rik|-|14|14 D1|ncRNA	NR_033788	0.032	0	0.0306	0	0.592593	0	0.413514	#DIV/0!	0.191585	0.497	1	-0.0439721	0.947	0.968	-2.07	0.546	1	0.0938924	0.51	1	NA	1	1	2.35798	0.449937	1	0.096	0	0	0	0	0	0	0	0.067	0	0	0.086	0	0	0	0	0	0	0.054	0.084
	1700109G15Rik	1700109G15Rik|-|-|11|11 C|ncRNA	NR_046197	0	0	0	0	#DIV/0!	#DIV/0!	#DIV/0!	#DIV/0!	NA	1	1	NA	1	1	NA	1	1	NA	1	1	NA	1	1	NA	1	1	0	0	0	0	0	0	0	0	0	0	0	0	0	0	0	0	0	0	0	0
	1700109H08Rik	1700109H08Rik|-|-|5|5 A1|protein-coding	NM_029843	1.99	1.20775	0.9096	0.649833	1.57437	0.786296	0.682371	1.52186	0.372307	0.412	0.603	0.645248	0.178	0.289	-1.31	1	1	-0.136279	0.691	0.899	-0.805	0.409	0.587	0.525776	1	1	2.323	2.219	1.428	1.401	2.639	0.368	0.423	0.69	0.377	2.203	0.505	0.773	2.621	0	0.052	0.392	0.303	0.531	1.264	1.536
	1700109I08Rik	1700109I08Rik|-|-|14|14 B|ncRNA	NR_045936	0	0	0	0	#DIV/0!	#DIV/0!	#DIV/0!	#DIV/0!	NA	1	1	NA	1	1	NA	1	1	NA	1	1	NA	1	1	NA	1	1	0	0	0	0	0	0	0	0	0	0	0	0	0	0	0	0	0	0	0	0
	1700109K24Rik	1700109K24Rik|4933425G21Rik|-|15|15 D3|ncRNA	NR_108037	0.0836667	0.21175	0.0964	0.0925	0.0227293	0.138399	0.0602877	0.37	-0.83354	0.118	0.262	-0.282285	0.707	0.802	0.38	0.777	0.854	-0.247889	0.422	0.756	-1.11	0.15	0.299	0.284348	0.830941	0.91963	0.211	0.04	0	0.125	0.198	0.199	0.325	0	0	0	0.356	0.126	0.155	0	0.221	0.085	0	0.094	3.681	1.53
	1700110C19Rik	1700110C19Rik|-|-|17|17 A1|ncRNA	NR_045461	0	0.0605	0.0546	0.0441667	0	0.130952	0.266341	0.300454	-0.684663	0.121	1	-0.690369	0.275	0.408	3.15	0.184	0.302	-0.0180421	0.945	1	-0.608	0.636	0.774	0.505361	0.752529	1	0	0	0	0.081	0.025	0.06	0.076	0	0	0	0.083	0.19	0	0	0.026	0.043	0.149	0.047	0.296	0.462
	1700110I01Rik	1700110I01Rik|100040740|1700016F01Rik|Gm2938|-|14|14 A1|ncRNA	NR_038059	0	0	0	0	#DIV/0!	#DIV/0!	#DIV/0!	#DIV/0!	NA	1	1	NA	1	1	NA	1	1	NA	1	1	NA	1	1	NA	1	1	0	0	0	0	0	0	0	0	0	0	0	0	0	0	0	0	0	0	0	0
	1700110I07Rik	1700110I07Rik|-|-|7|7 B3|ncRNA	NR_131068	0	0	0	0	#DIV/0!	#DIV/0!	#DIV/0!	#DIV/0!	NA	1	1	NA	1	1	NA	1	1	NA	1	1	NA	1	1	NA	1	1	0	0	0	0	0	0	0	0	0	0	0	0	0	0	0	0	0	0	0	0
	1700110K17Rik	1700110K17Rik|-|-|9|9 A5.1|ncRNA	NR_040728	1.676	1.58325	1.3396	1.83567	0.486926	0.592312	0.323888	0.848667	-0.0857393	0.82	0.9	-0.0202208	0.96	0.976	0.278	0.484	0.617	-0.0525116	0.86	0.958	0.177	0.62	0.761	-0.248968	0.477786	0.697696	1.95	0.945	2.133	1.074	2.595	1.352	1.312	0.692	0.906	2.023	1.14	1.937	1.753	0.697	2.958	2.185	1.872	1.549	3.442	2.673
	1700111N16Rik	1700111N16Rik|-|-|X|X A7.2|ncRNA	NR_033213	0	0.004	0	0	#DIV/0!	#DIV/0!	#DIV/0!	#DIV/0!	-0.0897196	0.748	1	NA	1	1	NA	1	1	0.00913838	0.946	1	-0.583	0.857	1	NA	1	1	0	0	0	0	0.016	0	0	0	0	0	0	0	0	0	0	0	0	0	0	0
	1700112E06Rik	1700112E06Rik|2700009F18Rik|-|14|14 A3|protein-coding	NM_028275	0.093	0.1785	0.7526	1.184	0.492063	1.82143	11.5785	10.1197	-0.663158	0.209	0.387	-2.81275	1.13e-07	7.66e-07	3.92	1.39e-08	1.27e-07	1.44354	6.56e-06	0.000295	2.76	1.86e-07	3.99e-06	-0.573052	0.191871	0.426546	0.042	0.191	0.046	0.172	0.139	0.192	0.211	0.974	0.944	0.527	0.561	0.757	0.581	2.388	1.514	0.956	0.87	0.795	0.189	0.098
	1700112H15Rik	1700112H15Rik|-|-|1|1 H5|ncRNA	NR_040472	0	0	0	0	#DIV/0!	#DIV/0!	#DIV/0!	#DIV/0!	NA	1	1	NA	1	1	NA	1	1	NA	1	1	NA	1	1	NA	1	1	0	0	0	0	0	0	0	0	0	0	0	0	0	0	0	0	0	0	0	0
	1700112J05Rik	1700112J05Rik|1700110A09Rik|-|5 C3.3|5|ncRNA	NR_077218	0	0.04175	0	0.0075	0	1.49107	0	#DIV/0!	-0.445389	0.245	1	NA	1	1	1.13	0.75	1	-0.116967	0.487	1	-2.16	0.298	1	0.335438	0.915169	1	0	0	0	0	0.045	0.054	0.068	0	0	0	0	0	0	0	0	0	0.045	0	0.053	0.028
	1700112J16Rik	1700112J16Rik|-|-|7|7 C|ncRNA	NR_131043	0	0.0515	0.2154	0.203333	0	0.166667	2.62683	0.439165	-0.487277	0.336	0.528	-1.45299	0.0101	0.0256	1.65	0.00314	0.0102	0.565158	0.0971	0.378	0.881	0.0664	0.17	0.0856661	0.858546	0.934715	0	0	0	0.054	0	0	0.152	0.544	0.297	0.046	0	0.19	0.626	0.105	0.308	0.086	0	0.095	0.593	0.309
	1700113A16Rik	1700113A16Rik|2210408E11Rik|AA408983|-|3|3 F1|ncRNA	NR_045997	8.67633	11.1498	11.3896	18.3288	0.659246	0.435809	0.395953	0.509403	-0.508912	0.0632	0.168	-0.696761	0.00129	0.00414	1.25	8.03e-06	4.78e-05	0.150445	0.506	0.809	0.7	0.0138	0.0528	-0.526837	0.0239335	0.116655	9.217	10.505	6.307	6.776	9.519	11.892	16.412	14.141	10.866	8.449	9.905	13.587	8.214	17.277	22.956	17.727	22.24	21.559	13.161	25.584
	1700113B09Rik	1700113B09Rik|-|-|10|10 B5.3|ncRNA	NR_131003	0	0	0	0	#DIV/0!	#DIV/0!	#DIV/0!	#DIV/0!	NA	1	1	NA	1	1	NA	1	1	NA	1	1	NA	1	1	NA	1	1	0	0	0	0	0	0	0	0	0	0	0	0	0	0	0	0	0	0	0	0
	1700113H08Rik	1700113H08Rik|-|-|10|10 C1|protein-coding	NM_029685	0.0313333	0.017	0	0	0.979167	1	#DIV/0!	#DIV/0!	0.145329	0.741	1	0.343757	0.538	1	-2.81	0.406	1	-0.0562289	0.681	1	-2.1	0.506	1	NA	1	1	0.014	0.08	0	0	0.027	0	0.041	0	0	0	0	0	0	0	0	0	0	0	0.032	0.017
	1700116B05Rik	1700116B05Rik|-|-|16|16 B5|ncRNA	NR_131006	0.031	0	0	0.0138333	#DIV/0!	#DIV/0!	#DIV/0!	#DIV/0!	0.103793	0.71	1	0.0372416	0.945	1	-0.595	0.865	1	NA	1	1	0.619	0.848	1	0.335438	0.915169	1	0.093	0	0	0	0	0	0	0	0	0	0	0	0	0	0	0	0	0.083	0	0
	1700119H24Rik	1700119H24Rik|-|-|16|16 B3|ncRNA	NR_040536	0.0116667	0	0	0	#DIV/0!	0	#DIV/0!	#DIV/0!	0.0334247	0.905	1	-0.0715375	0.894	1	-0.315	0.929	1	NA	1	1	NA	1	1	NA	1	1	0	0	0.035	0	0	0	0	0	0	0	0	0	0	0	0	0	0	0	0	0.038
	1700120C14Rik	1700120C14Rik|-|-|15|15 F1|ncRNA	NR_045627	0.263	0.5575	0.4882	0.600333	0.475588	0.60532	0.63817	0.765731	-0.821831	0.104	0.239	-0.990507	0.105	0.189	1.37	0.0868	0.167	0.00842157	0.98	0.993	0.113	0.862	0.924	-0.107815	0.869792	0.940516	0.298	0.223	0.268	0.353	0.466	0.563	0.848	0.507	0.415	0.468	0.696	0.355	0.146	1.374	0.527	0.64	0.649	0.266	0.553	0.921
	1700120E14Rik	1700120E14Rik|-|-|18|18 E2|ncRNA	NR_045368	0	0	0	0	#DIV/0!	#DIV/0!	#DIV/0!	#DIV/0!	NA	1	1	NA	1	1	NA	1	1	NA	1	1	NA	1	1	NA	1	1	0	0	0	0	0	0	0	0	0	0	0	0	0	0	0	0	0	0	0	0
	1700120G07Rik	1700120G07Rik|-|-|7|7 F3|ncRNA	NR_046050	0	0.01025	0	0	#DIV/0!	#DIV/0!	#DIV/0!	#DIV/0!	-0.142496	0.61	1	NA	1	1	NA	1	1	-0.01273	0.925	1	-1.12	0.727	1	NA	1	1	0	0	0	0	0.041	0	0	0	0	0	0	0	0	0	0	0	0	0	0	0
	1700120K04Rik	1700120K04Rik|-|-|7|7 F3|ncRNA	NR_027915	0.449333	0.43025	0.3652	0.300167	1.90395	1.31575	0.83954	10.7202	-0.100182	0.837	0.91	-0.0845206	0.889	0.93	-0.491	0.527	0.658	-0.00692322	0.984	0.994	-0.628	0.32	0.498	0.59301	0.388936	0.62892	0.388	0.238	0.722	0.466	0.563	0.24	0.452	0	0.393	0.544	0.385	0.504	0.138	0	0.306	0.398	0.329	0.63	0.236	0.327
	1700121L16Rik	1700121L16Rik|-|-|X|X D|ncRNA	NR_045453	0	0	0	0	#DIV/0!	#DIV/0!	#DIV/0!	#DIV/0!	NA	1	1	NA	1	1	NA	1	1	NA	1	1	NA	1	1	NA	1	1	0	0	0	0	0	0	0	0	0	0	0	0	0	0	0	0	0	0	0	0
	1700121N20Rik	1700121N20Rik|-|-|12|12 F1|ncRNA	NR_036593	0	0	0	0.012	0	#DIV/0!	#DIV/0!	0.272727	NA	1	1	NA	1	1	2.03	0.565	1	NA	1	1	1.52	0.636	1	-0.566126	0.856796	1	0	0	0	0	0	0	0	0	0	0	0	0	0	0	0.072	0	0	0	0.042	0
	1700122C19Rik	1700122C19Rik|-|-|19|19 C2|ncRNA	NR_131008	0	0	0	0	#DIV/0!	#DIV/0!	#DIV/0!	#DIV/0!	NA	1	1	NA	1	1	NA	1	1	NA	1	1	NA	1	1	NA	1	1	0	0	0	0	0	0	0	0	0	0	0	0	0	0	0	0	0	0	0	0
	1700122O11Rik	1700122O11Rik|-|-|17|17 C|protein-coding	NM_029689	0	0	0	0	#DIV/0!	#DIV/0!	#DIV/0!	#DIV/0!	NA	1	1	NA	1	1	NA	1	1	NA	1	1	NA	1	1	NA	1	1	0	0	0	0	0	0	0	0	0	0	0	0	0	0	0	0	0	0	0	0
	1700123J17Rik	1700123J17Rik|-|-|7|7 F3|ncRNA	NR_131047	0.00433333	0	0	0	0.0330789	#DIV/0!	#DIV/0!	0	0.103793	0.71	1	0.0552148	0.918	1	-0.315	0.929	1	NA	1	1	NA	1	1	NA	1	1	0	0	0.013	0	0	0	0	0	0	0	0	0	0	0	0	0	0	0	0.131	0
	1700123K08Rik	1700123K08Rik|-|-|5|5 G2|protein-coding	NM_029693	0	0	0	0	#DIV/0!	#DIV/0!	#DIV/0!	#DIV/0!	NA	1	1	NA	1	1	NA	1	1	NA	1	1	NA	1	1	NA	1	1	0	0	0	0	0	0	0	0	0	0	0	0	0	0	0	0	0	0	0	0
	1700123L14Rik	1700123L14Rik|-|-|6|6 D3|pseudo	NR_003643	0.0643333	0.11025	0.112	0.0788333	0.857778	2.82692	2.15385	2.91975	-0.528027	0.323	0.514	-0.800567	0.248	0.376	0.522	0.594	0.714	0.0904149	0.792	0.933	-0.419	0.491	0.659	0.601411	0.349368	0.593168	0.168	0.013	0.012	0.103	0.105	0.153	0.08	0.115	0.188	0.125	0.052	0.08	0.121	0.022	0.098	0.09	0.042	0.1	0.075	0.039
	1700123M08Rik	1700123M08Rik|1600025K15Rik|-|4|4 A1|ncRNA	NR_040577	0.839333	0.6275	1.1322	1.05683	0.615347	0.698775	1.01908	0.807359	0.205224	0.585	0.745	-0.653313	0.0606	0.119	0.543	0.177	0.294	0.701621	0.0188	0.14	0.778	0.0576	0.154	0.171243	0.633885	0.807622	0.774	0.831	0.913	0.677	0.338	0.572	0.923	1.564	0.903	0.664	1.179	1.351	0.953	1.817	1.026	0.929	0.908	0.708	1.364	0.898
	1700123O12Rik	1700123O12Rik|-|-|4|4 A1|ncRNA	NR_045185	0	0	0	0	#DIV/0!	#DIV/0!	#DIV/0!	#DIV/0!	NA	1	1	NA	1	1	NA	1	1	NA	1	1	NA	1	1	NA	1	1	0	0	0	0	0	0	0	0	0	0	0	0	0	0	0	0	0	0	0	0
	1700123O20Rik	1700123O20Rik|MNCb-2990|-|14|14 C2|protein-coding	NM_021437	14.9893	13.7737	14.4594	13.9898	1.24766	1.37944	1.67626	1.19571	-0.0682051	0.725	0.844	-0.264905	0.0946	0.173	0.109	0.667	0.77	0.188668	0.224	0.576	0.0328	0.886	0.938	0.168503	0.394029	0.633849	13.332	17.263	14.373	14.42	11.43	14.158	15.087	14.548	12.965	12.429	15.511	16.844	11.808	18.907	13.061	13.824	12.433	13.906	12.014	9.985
	1700123O21Rik	1700123O21Rik|-|-|16 A1|16 2.71 cM|ncRNA	NR_045799	0.0103333	0.06075	0.0158	0	#DIV/0!	1.84091	#DIV/0!	#DIV/0!	-0.274084	0.452	1	-0.148073	0.783	1	-0.315	0.929	1	-0.0729253	0.647	1	-2.93	0.347	1	1.51548	0.6292	1	0	0	0.031	0	0	0	0.243	0	0.079	0	0	0	0	0	0	0	0	0	0	0.033
	1700124L16Rik	1700124L16Rik|-|-|6|6 C3|ncRNA	NR_105027	1.56033	0.8245	0.5676	0.579	0.700644	0.319822	0.389835	0.258713	0.508539	0.283	0.473	0.955483	0.0843	0.157	-1.28	0.0496	0.106	-0.230633	0.502	0.807	-0.588	0.358	0.536	0.140912	0.827364	0.917786	1.221	2.562	0.898	1.242	0.365	0.504	1.187	0.284	0.31	0.62	0.433	1.191	0.109	0.769	0.912	0.358	0.83	0.496	2.227	2.578
	1700125G02Rik	1700125G02Rik|-|-|4|4 D2.2|ncRNA	NR_040651	0.039	0	0.0328	0.0646667	0.0590909	0	0.082	1.09605	0.168451	0.548	1	-0.019403	0.977	0.987	0.984	0.566	0.69	0.0810062	0.55	1	2.91	0.156	1	-0.904662	0.574843	1	0.037	0	0.08	0	0	0	0	0	0	0.032	0	0.132	0.181	0	0.072	0	0.069	0.066	0.66	0.129
	1700125G22Rik	1700125G22Rik|-|-|3|3 A3|ncRNA	NR_040548	0.015	0	0	0.0653333	0.3	#DIV/0!	#DIV/0!	0.531165	0.103793	0.71	1	0.0372416	0.945	1	2.54	0.318	0.454	NA	1	1	3.77	0.154	0.305	-2.82175	0.286454	1	0.045	0	0	0	0	0	0	0	0	0	0	0	0	0.352	0	0	0	0.04	0.05	0
	1700125H03Rik	1700125H03Rik|4930510D22Rik|-|8|8 B3.3|ncRNA	NR_038189	0	0.06875	0.0848	0.0686667	0	0.165264	0.276221	#DIV/0!	-0.410822	0.27	1	-0.961947	0.161	0.267	3.21	0.227	0.354	0.114461	0.649	1	0.0861	0.957	0.977	0.62721	0.683333	1	0	0	0	0	0.037	0.181	0.057	0	0	0.034	0.248	0.142	0	0	0.192	0	0.149	0.071	0.532	0.416
	1700125H20Rik	1700125H20Rik|-|-|11|11 C|protein-coding	NM_028589	0.0483333	0.059	0.032	0.0916667	0.122054	0.214545	0.262295	1.17521	-0.211711	0.684	0.816	-0.0273843	0.971	0.983	1.1	0.309	0.444	-0.0857928	0.74	1	0.506	0.617	0.759	-0.953924	0.413085	1	0.059	0.022	0.064	0.06	0.148	0	0.028	0	0	0.068	0.092	0	0.116	0	0.134	0.191	0.074	0.035	0.396	0.275
	1700126H18Rik	1700126H18Rik|-|-|5|5 C3.1|ncRNA	NR_040695	0	0	0	0	#DIV/0!	#DIV/0!	#DIV/0!	#DIV/0!	NA	1	1	NA	1	1	NA	1	1	NA	1	1	NA	1	1	NA	1	1	0	0	0	0	0	0	0	0	0	0	0	0	0	0	0	0	0	0	0	0
	1700128A07Rik	1700128A07Rik|-|-|14|14 E2.3|ncRNA	NR_045938	0	0	0	0	#DIV/0!	#DIV/0!	#DIV/0!	#DIV/0!	NA	1	1	NA	1	1	NA	1	1	NA	1	1	NA	1	1	NA	1	1	0	0	0	0	0	0	0	0	0	0	0	0	0	0	0	0	0	0	0	0
	1700128F08Rik	1700128F08Rik|-|-|9|9 A1|pseudo	NR_033618	0	0	0	0	#DIV/0!	#DIV/0!	#DIV/0!	#DIV/0!	NA	1	1	NA	1	1	NA	1	1	NA	1	1	NA	1	1	NA	1	1	0	0	0	0	0	0	0	0	0	0	0	0	0	0	0	0	0	0	0	0
	1700129C05Rik	1700129C05Rik|-|-|14|14 C3|protein-coding	NM_026461	0	0	0	0	#DIV/0!	#DIV/0!	#DIV/0!	#DIV/0!	NA	1	1	NA	1	1	NA	1	1	NA	1	1	NA	1	1	NA	1	1	0	0	0	0	0	0	0	0	0	0	0	0	0	0	0	0	0	0	0	0
	1810006J02Rik	1810006J02Rik|-|-|1|1 D|ncRNA	NR_040439	0	0	0	0	0	0	#DIV/0!	0	NA	1	1	NA	1	1	NA	1	1	NA	1	1	NA	1	1	NA	1	1	0	0	0	0	0	0	0	0	0	0	0	0	0	0	0	0	0	0	0.025	0.013
	1810007C17Rik	1810007C17Rik|-|-|12|12 B3|ncRNA	NR_045472	0	0	0	0	#DIV/0!	0	#DIV/0!	#DIV/0!	NA	1	1	NA	1	1	NA	1	1	NA	1	1	NA	1	1	NA	1	1	0	0	0	0	0	0	0	0	0	0	0	0	0	0	0	0	0	0	0	0.031
	1810007D17Rik	1810007D17Rik|-|-|19|19 D2|ncRNA	NR_038136	0.0376667	0.006	0	0.00766667	0.327536	#DIV/0!	0	0.0416667	0.231335	0.508	1	0.235568	0.665	1	-1.82	0.534	1	0.00913838	0.946	1	-0.102	0.975	1	0.335438	0.915169	1	0	0.029	0.084	0	0.024	0	0	0	0	0	0	0	0	0	0	0	0	0.046	0.115	0
	1810008I18Rik	1810008I18Rik|-|-|7|7 C|ncRNA	NR_045301	0	0	0	0	#DIV/0!	#DIV/0!	#DIV/0!	#DIV/0!	NA	1	1	NA	1	1	NA	1	1	NA	1	1	NA	1	1	NA	1	1	0	0	0	0	0	0	0	0	0	0	0	0	0	0	0	0	0	0	0	0
	1810009A15Rik	1810009A15Rik|-|-|19|19 A|protein-coding	NM_025463	28.104	20.8597	20.2462	22.2325	2.2399	1.73715	1.61376	1.13217	0.221919	0.288	0.479	0.148645	0.33	0.466	-0.0906	0.808	0.875	0.0765414	0.653	0.881	0.135	0.694	0.816	-0.0482591	0.870462	0.940784	26.581	28.193	29.538	24.479	18.936	16.715	23.309	21.537	18.242	19.179	22.147	20.126	20.165	39.077	25.86	16.875	15.248	16.17	12.547	12.008
	1810009J06Rik	1810009J06Rik|-|-|6|6 B1|protein-coding	NM_023707	0	0	0	0	#DIV/0!	#DIV/0!	#DIV/0!	#DIV/0!	NA	1	1	NA	1	1	NA	1	1	NA	1	1	NA	1	1	NA	1	1	0	0	0	0	0	0	0	0	0	0	0	0	0	0	0	0	0	0	0	0
	1810010D01Rik	1810010D01Rik|Gm2572|-|7 F5|7|ncRNA	NR_033626	0	0	0.0128	0.0131667	#DIV/0!	#DIV/0!	#DIV/0!	#DIV/0!	NA	1	1	-0.384754	0.473	1	2.03	0.565	1	0.0844658	0.534	1	1.52	0.636	1	0.659384	0.832407	1	0	0	0	0	0	0	0	0	0	0	0.064	0	0	0	0.079	0	0	0	0	0
	1810010H24Rik	1810010H24Rik|OTTMUSG00000003581|-|11|11 E1|protein-coding	NM_001163473	9.77067	9.46675	6.0628	5.456	6.27935	3.41021	3.17092	2.18502	-0.151702	0.49	0.67	0.378336	0.0492	0.0999	-0.628	0.0234	0.057	-0.482115	0.0167	0.128	-0.79	0.00332	0.0177	0.263898	0.276103	0.522561	9.565	10.688	9.059	11.465	10.429	8.237	7.736	8.296	5.84	5.545	4.953	5.68	6.588	6.046	4.184	6.87	4.337	4.711	1.556	2.776
	1810011H11Rik	1810011H11Rik|4733401I05Rik|-|14|14 B|protein-coding	NM_001163616	0.0186667	0.0245	0.044	0.104333	0.16092	0.0648148	0.168582	0.202589	-0.0978431	0.824	1	-0.429281	0.548	0.671	2.54	0.0651	0.132	0.133913	0.59	1	2.05	0.0624	0.162	-1.20778	0.300094	0.548947	0	0	0.056	0	0.049	0.03	0.019	0	0	0.034	0	0.186	0	0.077	0.113	0.084	0.073	0.279	0.116	0.378
	1810011O10Rik	1810011O10Rik|1110065B09Rik|AW121743|AW321058|-|8|8 A2|protein-coding	NM_026931	0.431333	1.32025	0.583	0.666667	0.363687	1.29691	0.547418	2.55428	-1.55542	2.9e-05	0.000358	-0.653488	0.158	0.263	0.726	0.38	0.517	-0.71496	0.0265	0.173	-1.08	0.136	0.28	0.0359725	0.95986	0.984739	0.503	0.388	0.403	1.053	2.364	1.044	0.82	0.367	1.042	0.235	0.448	0.823	0.141	0.028	0.514	0.418	0.483	2.416	1.186	1.018
	1810012K16Rik	1810012K16Rik|-|-|8|8 A2|ncRNA	NR_045473	0	0.0125	0.0254	0.1035	0	#DIV/0!	0.461818	1.84821	-0.0897196	0.748	1	-0.296912	0.579	1	4.21	0.0805	0.157	0.0314126	0.817	1	2.99	0.134	0.277	-2.08734	0.282477	1	0	0	0	0	0	0	0.05	0	0	0	0	0.127	0.452	0	0.103	0	0.066	0	0.079	0
	1810013A23Rik	1810013A23Rik|-|-|17|17 A3.3|ncRNA	NR_045427	0	0	0	0	#DIV/0!	#DIV/0!	#DIV/0!	#DIV/0!	NA	1	1	NA	1	1	NA	1	1	NA	1	1	NA	1	1	NA	1	1	0	0	0	0	0	0	0	0	0	0	0	0	0	0	0	0	0	0	0	0
	1810013L24Rik	1810013L24Rik|1110017P05Rik|3010002C02Rik|AA792997|AW124177|Gm19906|R74903|-|16|16 A1|protein-coding	NM_001081400	12.216	15.8428	15.8192	12.4633	0.949922	1.08967	1.1209	1.28594	-0.550356	0.00588	0.0275	-0.689489	1.7e-05	8.08e-05	0.217	0.449	0.584	0.122745	0.434	0.764	-0.357	0.176	0.334	0.487551	0.032936	0.143127	10.9	14.271	11.477	16.7	18.01	15.783	12.878	16.146	16.701	17.927	12.662	15.66	17.795	6.81	9.872	14.523	13.153	12.627	12.86	14.539
	1810014B01Rik	1810014B01Rik|-|-|10 C1|10|pseudo	NR_015572	1.93033	2.22125	3.0326	2.89167	1.98186	2.25051	2.37851	1.88874	-0.375994	0.0752	0.19	-0.930971	1.81e-05	8.57e-05	0.796	0.00543	0.0165	0.51728	0.00515	0.0564	0.401	0.108	0.239	0.171869	0.47696	0.697049	1.878	1.874	2.039	2.065	2.374	2.09	2.356	3.199	3.425	2.697	2.21	3.632	3.67	3.436	2.865	2.381	2.338	2.66	0.974	0.987
	1810018F18Rik	1810018F18Rik|1810031L05Rik|1810047O18Rik|-|19|19 D2|ncRNA	NR_038140	0	0	0	0	#DIV/0!	#DIV/0!	#DIV/0!	#DIV/0!	NA	1	1	NA	1	1	NA	1	1	NA	1	1	NA	1	1	NA	1	1	0	0	0	0	0	0	0	0	0	0	0	0	0	0	0	0	0	0	0	0
	1810019D21Rik	1810019D21Rik|-|-|8|8 D3|ncRNA	NR_040346	0	0.005	0.0044	0	0	0.3125	#DIV/0!	0	-0.0897196	0.748	1	-0.296912	0.579	1	NA	1	1	0.0314126	0.817	1	-0.583	0.857	1	1.51548	0.6292	1	0	0	0	0	0	0	0.02	0	0	0	0.022	0	0	0	0	0	0	0	0.062	0.016
	1810020O05Rik	1810020O05Rik|-|-|6 D1|6|ncRNA	NR_045482	0.225667	0.14125	0.1076	0.1025	0.690112	0.663146	0.952212	0.337171	0.327605	0.53	0.702	0.603262	0.372	0.508	-0.941	0.262	0.395	-0.101352	0.756	0.922	-0.421	0.617	0.759	0.137759	0.879633	0.945412	0.33	0.248	0.099	0.019	0.155	0.208	0.183	0.094	0.153	0.094	0	0.197	0.072	0	0.23	0.148	0.034	0.131	0.327	0.213
	1810021B22Rik	1810021B22Rik|-|-|15|15 E3|ncRNA	NR_040417	1.562	2.816	3.1506	3.47083	0.662426	1.68522	4.09169	3.18133	-0.960287	0.000524	0.00398	-1.24526	1.12e-05	5.51e-05	1.36	0.00272	0.00903	0.225522	0.319	0.675	0.318	0.421	0.598	-0.0372246	0.919975	0.965942	1.616	1.422	1.648	2.897	2.429	3.133	2.805	4.204	2.949	2.321	3.023	3.256	1.699	6.745	4.458	2.512	2.47	2.941	2.358	1.671
	1810022K09Rik	1810022K09Rik|AI746582|AL023036|-|3|3 A1|protein-coding	NM_001099674	15.0997	8.296	8.8374	8.81217	1.01531	0.782125	0.995876	0.506796	0.617736	0.00201	0.0117	0.431908	0.0917	0.168	-0.522	0.184	0.303	0.1767	0.44	0.768	0.115	0.747	0.852	0.104114	0.76788	0.886737	15.712	15.399	14.188	8.946	8.402	7.568	8.268	10.377	12.806	6.849	6.03	8.125	6.588	17.127	9.672	6.083	6.231	7.172	14.872	10.607
	1810024B03Rik	1810024B03Rik|-|-|2|2 F1|protein-coding	NM_198630	0.093	0.1905	0.1968	0.175167	2.73529	1.81429	1.40571	1.21644	-0.75287	0.149	0.309	-1.21573	0.0411	0.0856	1.12	0.168	0.283	0.136494	0.691	0.899	-0.121	0.866	0.927	0.382866	0.53526	0.738755	0.061	0.153	0.065	0.062	0.412	0.137	0.151	0.077	0.169	0.286	0.236	0.216	0.297	0	0.117	0.195	0.226	0.216	0.034	0.105
	1810026B05Rik	1810026B05Rik|-|-|7|7 D1|ncRNA	NR_037569	0.764667	0.903	1.1852	0.694	0.336858	0.716667	0.792246	0.726702	-0.412019	0.0564	0.154	-0.907543	0.00122	0.00394	0.0451	0.839	0.895	0.444448	0.0621	0.29	-0.39	0.0447	0.128	0.902185	0.000337718	0.00574299	0.851	0.665	0.778	0.846	0.908	0.767	1.091	1.159	1.264	0.597	1.258	1.648	0.623	0.75	0.841	0.588	0.611	0.751	2.27	1.26
	1810030O07Rik	1810030O07Rik|-|-|X|X A1.1|protein-coding	NM_175141	8.77267	8.32625	8.5664	9.3085	0.943196	1.08316	1.20637	1.38252	-0.116319	0.531	0.703	-0.28403	0.0533	0.107	0.258	0.0905	0.172	0.16192	0.249	0.606	0.135	0.343	0.522	0.0342062	0.772813	0.889532	9.86	7.671	8.787	8.813	7.954	8.913	7.625	8.845	8.731	8.996	7.144	9.116	9.138	6.538	10.682	10.171	9.9	9.422	9.301	7.687
	1810032O08Rik	1810032O08Rik|-|-|11|11 E2|ncRNA	NR_027820	0.853	0.398	0.4478	0.5785	0.257393	0.226265	0.406352	0.82525	0.362798	0.396	0.588	0.335559	0.564	0.685	-0.469	0.5	0.632	0.0243095	0.943	0.981	-0.0265	0.965	0.982	0.064968	0.926069	0.968812	1.058	0.483	1.018	0.058	0.591	0.454	0.489	0	0.239	0.123	0.446	1.431	0.364	1.414	0.856	0.046	0.587	0.204	3.314	1.759
	1810034E14Rik	1810034E14Rik|-|-|13|13 B3|ncRNA	NR_045798	0.12	0.1375	0.3976	0.331833	5	3.71622	3.45739	2.47637	-0.265929	0.593	0.752	-1.77768	0.000263	0.000988	1.68	0.00251	0.00842	1.16684	0.000133	0.00351	1.27	0.00223	0.0128	0.345693	0.322318	0.569702	0.032	0.179	0.149	0.14	0.16	0.144	0.106	0.542	0.326	0.31	0.43	0.38	0.364	0.462	0.349	0.291	0.278	0.247	0.024	0.037
	1810037I17Rik	1810037I17Rik|5730414I01Rik|-|3|3 G1|protein-coding	NM_024461	53.6593	54.3197	51.3526	59.0722	2.73493	2.57488	1.78935	1.18019	-0.200241	0.442	0.63	-0.248092	0.152	0.255	0.378	0.327	0.464	0.0346538	0.864	0.959	0.156	0.669	0.798	-0.116491	0.697623	0.844632	42.887	61.516	56.575	74.725	46.01	38.867	57.677	54.52	41.304	48.529	54.525	57.885	57.221	108.289	61.632	41.83	45.36	40.101	19.62	21.096
	1810041H14Rik	1810041H14Rik|-|-|14|14 E5|ncRNA	NR_130999	0.0196667	0.01275	0.039	0.0426667	#DIV/0!	0.028781	#DIV/0!	0.197531	0.0334247	0.905	1	-0.148073	0.783	1	1.22	0.695	1	0.0614787	0.649	1	0.951	0.741	1	-0.628002	0.803244	1	0	0	0.059	0	0.051	0	0	0	0	0	0	0.195	0	0	0.158	0	0	0.098	0	0.443
	1810041L15Rik	1810041L15Rik|Kiaa1644|-|15|15 E2|protein-coding	NM_001163145	3.128	8.35175	8.2726	9.60483	0.44495	0.609528	0.930865	1.63292	-1.48172	2.68e-08	8.67e-07	-1.69599	2.7e-24	9.43e-23	1.78	5.77e-24	2.59e-22	0.121997	0.554	0.835	0.194	0.388	0.566	-0.0604772	0.637702	0.810309	3.283	2.611	3.49	4.665	11.477	7.309	9.956	7.794	6.586	8.361	8.328	10.294	9.417	6.657	12.123	10.554	9.742	9.136	7.03	13.702
	1810043G02Rik	1810043G02Rik|AV026620|D10Jhu13e|-|10 C1|10 39.72 cM|protein-coding	NM_026431	10.8517	8.69825	7.6018	11.2595	0.863574	0.623888	0.578172	0.732897	0.135014	0.565	0.73	0.195213	0.329	0.465	0.262	0.399	0.536	-0.0498451	0.805	0.939	0.399	0.17	0.326	-0.451809	0.0764444	0.247225	10.527	9.632	12.396	7.607	6.859	8.115	12.212	6.364	7.417	5.987	8.648	9.593	9.044	17.34	12.854	8.344	9.98	9.995	12.566	13.942
	1810044D09Rik	1810044D09Rik|-|-|6|6 D1|ncRNA	NR_038153	1.52967	2.13775	1.967	2.12783	2.17282	2.33379	1.90048	0.98877	-0.515941	0.209	0.387	-0.529966	0.282	0.414	0.674	0.214	0.339	-0.0219074	0.945	0.982	0.0339	0.938	0.966	-0.0593939	0.89948	0.956248	0.789	1.288	2.512	1.685	1.334	2.327	3.205	3.025	1.21	0.644	2.276	2.68	1.315	4.373	1.792	2.037	1.769	1.481	0.704	0.916
	1810046K07Rik	1810046K07Rik|-|-|9|9 A5.3|protein-coding	NM_027217	0.0103333	0	0	0.00433333	0.322917	0	0	#DIV/0!	0.103793	0.71	1	0.0723736	0.893	1	-0.826	0.812	1	NA	1	1	0.619	0.848	1	0.335438	0.915169	1	0	0	0.031	0	0	0	0	0	0	0	0	0	0	0	0	0	0	0.026	0.032	0.034
	1810053B23Rik	1810053B23Rik|1810008L18Rik|1810056K14Rik|-|16|16 C4|ncRNA	NR_040488	0	0	0	0	#DIV/0!	#DIV/0!	#DIV/0!	#DIV/0!	NA	1	1	NA	1	1	NA	1	1	NA	1	1	NA	1	1	NA	1	1	0	0	0	0	0	0	0	0	0	0	0	0	0	0	0	0	0	0	0	0
	1810055G02Rik	1810055G02Rik|AI256204|-|19|19 A|protein-coding	NM_028077	15.5643	10.3697	6.6932	7.6055	0.882782	0.570205	0.446809	1.14713	0.383297	0.0143	0.0547	0.862646	8.28e-06	4.19e-05	-0.887	0.000202	0.000901	-0.448298	0.0119	0.103	-0.496	0.0225	0.077	0.0102676	0.96415	0.986219	16.694	14.986	15.013	10.329	11.092	9.584	10.474	4.318	8.117	7.568	6.729	6.734	6.097	3.485	10.103	7.717	8.461	9.77	17.631	18.186
	1810058I24Rik	1810058I24Rik|AI414869|AI848234|-|6|6 B1|ncRNA	NR_015608	31.2363	33.3715	26.2348	24.5953	1.56104	1.4924	1.67763	1.25975	-0.279498	0.214	0.393	-0.0888706	0.678	0.779	-0.102	0.783	0.858	-0.180416	0.383	0.731	-0.401	0.236	0.406	0.202386	0.508468	0.718653	26.303	33.796	33.61	30.435	26.805	30.486	45.76	22.043	23.796	19.561	33.281	32.493	16.787	45.856	24.512	19.653	20.074	20.69	20.01	22.361
	1810062G17Rik	1810062G17Rik|-|-|3|3 B|protein-coding	NM_028183	0.0606667	0.276	0.1478	0.125	#DIV/0!	5.63265	1.13692	1.86567	-1.50026	0.00327	0.0174	-1.11692	0.104	0.187	1.24	0.203	0.326	-0.421691	0.218	0.571	-1.17	0.0633	0.164	0.375071	0.617391	0.795355	0.042	0.095	0.045	0.279	0.238	0.287	0.3	0.108	0.118	0.09	0.197	0.226	0.062	0.292	0.143	0.136	0.079	0.038	0	0.049
	1810062O18Rik	1810062O18Rik|-|-|14|14 A3|ncRNA	NR_033571	1.74033	4.0905	4.7818	4.555	1.05029	1.85763	1.37448	2.24827	-1.27572	4.98e-05	0.000566	-1.71561	1.21e-12	1.54e-11	1.54	3.69e-08	3.18e-07	0.314224	0.183	0.526	0.129	0.653	0.787	0.230962	0.292087	0.540295	1.461	1.962	1.798	2.345	5.996	4.478	3.543	4.978	5.289	4.027	4.116	5.499	2.337	3.856	5.722	5.623	5.027	4.765	1.657	2.202
	1810063I02Rik	1810063I02Rik|-|-|11|11 B1.3|ncRNA	NR_130986	0	0.025	0	0	#DIV/0!	#DIV/0!	#DIV/0!	#DIV/0!	-0.0897196	0.748	1	NA	1	1	NA	1	1	0.00913838	0.946	1	-0.583	0.857	1	NA	1	1	0	0	0	0	0	0	0.1	0	0	0	0	0	0	0	0	0	0	0	0	0
	1810064F22Rik	1810064F22Rik|-|-|9|9 A3|ncRNA	NR_027981	0	0	0	0	#DIV/0!	#DIV/0!	#DIV/0!	0	NA	1	1	NA	1	1	NA	1	1	NA	1	1	NA	1	1	NA	1	1	0	0	0	0	0	0	0	0	0	0	0	0	0	0	0	0	0	0	0	0
	1810065E05Rik	1810065E05Rik|AV047390|-|11|11 B1.3|protein-coding	NM_027239	0	0	0	0	#DIV/0!	#DIV/0!	#DIV/0!	#DIV/0!	NA	1	1	NA	1	1	NA	1	1	NA	1	1	NA	1	1	NA	1	1	0	0	0	0	0	0	0	0	0	0	0	0	0	0	0	0	0	0	0	0
	2010001A14Rik	2010001A14Rik|-|-|11|11 B1.3|ncRNA	NR_131042	2.287	4.1165	6.8744	7.28867	4.08393	2.39192	2.21683	1.37965	-0.945345	0.00136	0.00856	-1.81057	7.18e-09	5.74e-08	1.93	0.000365	0.00153	0.736477	0.00279	0.0367	0.895	1	1	-0.014196	0.97414	0.989945	1.583	2.404	2.874	4.164	4.131	2.907	5.264	8.475	6.165	3.905	9.089	6.738	4.212	18.549	7.018	4.62	5.022	4.311	0.56	1.721
	2010003K11Rik	2010003K11Rik|-|-|19|19 A|protein-coding	NM_027237	0.0236667	0.04825	0.0092	0.00266667	0.215152	#DIV/0!	#DIV/0!	#DIV/0!	-0.266238	0.568	0.733	0.139428	0.811	0.878	-1.83	0.59	1	-0.205194	0.355	1	-2.92	0.124	1	1.03459	0.741676	1	0	0	0.071	0	0.062	0.037	0.094	0	0.046	0	0	0	0	0	0.016	0	0	0	0.11	0
	2010005H15Rik	2010005H15Rik|-|-|16|16 B3|protein-coding	NM_029733	0	0	0	0	#DIV/0!	#DIV/0!	#DIV/0!	#DIV/0!	NA	1	1	NA	1	1	NA	1	1	NA	1	1	NA	1	1	NA	1	1	0	0	0	0	0	0	0	0	0	0	0	0	0	0	0	0	0	0	0	0
	2010009K17Rik	2010009K17Rik|-|-|2|2 H1|ncRNA	NR_040609	0.0336667	0.07075	0.112	0.0195	0.089539	0.907051	2.15385	0.0730337	-0.301076	0.505	1	-0.579328	0.426	0.56	-0.647	0.828	1	0.0505063	0.845	1	-2.08	0.231	1	2.54396	0.151548	1	0.101	0	0	0.172	0.063	0	0.048	0.345	0.094	0	0	0.121	0	0	0	0.054	0.063	0	0.376	0.078
	2010010A06Rik	2010010A06Rik|5033420E22Rik|-|18|18 E3|ncRNA	NR_045394	0	0	0.0304	0.00883333	#DIV/0!	0	0.66087	0.12619	-0.142496	0.61	1	NA	1	1	1.13	0.75	1	-0.0216425	0.873	1	0.619	0.848	1	1.03459	0.741676	1	0	0	0	0	0	0	0	0.152	0	0	0	0	0	0	0	0	0	0.053	0	0.034
	2010016I18Rik	2010016I18Rik|-|-|3|3 F2.3|ncRNA	NR_033207	0	0	0	0.00583333	#DIV/0!	#DIV/0!	#DIV/0!	#DIV/0!	NA	1	1	NA	1	1	1.57	0.656	1	NA	1	1	1.07	0.741	1	-0.110734	0.971918	1	0	0	0	0	0	0	0	0	0	0	0	0	0	0	0.012	0	0.023	0	0	0
	2010106C02Rik	2010106C02Rik|-|-|17|17 E4|ncRNA	NR_045435	0	0	0.0092	0	#DIV/0!	#DIV/0!	#DIV/0!	#DIV/0!	NA	1	1	-0.296912	0.579	1	NA	1	1	0.0614787	0.649	1	NA	1	1	1.51548	0.6292	1	0	0	0	0	0	0	0	0	0	0	0.046	0	0	0	0	0	0	0	0	0
	2010106E10Rik	2010106E10Rik|-|-|X|X E1|protein-coding	NM_026333	0	0.0035	0.0156	0	#DIV/0!	#DIV/0!	0.331915	#DIV/0!	-0.0897196	0.748	1	-0.296912	0.579	1	NA	1	1	0.0395595	0.78	1	-0.583	0.857	1	1.51548	0.6292	1	0	0	0	0	0.014	0	0	0.078	0	0	0	0	0	0	0	0	0	0	0	0
	2010107E04Rik	2010107E04Rik|9430003J03Rik|AU043134|AV124504|Mp68|-|12|12 F1|protein-coding	NM_027360	151.765	197.985	227.915	215.501	0.868398	1.06532	1.29917	0.753478	-0.523663	0.0607	0.163	-0.882261	0.000566	0.00197	0.75	0.0986	0.185	0.286853	0.264	0.621	0.177	0.683	0.809	0.172531	0.65431	0.820312	127.571	160.72	167.003	176.841	108.033	236.961	270.104	282.478	258.536	117.911	238.443	242.209	111.439	481.665	225.669	153.499	160.124	160.609	174.764	185.845
	2010107G23Rik	2010107G23Rik|AA545165|-|10|10 B4|protein-coding	NM_027251	11.7647	3.8835	3.2384	8.0455	0.490992	0.277234	0.246285	0.411177	1.28692	6.38e-05	0.000696	1.50791	2.44e-15	4.01e-14	-0.352	0.351	0.488	-0.0833164	0.759	0.922	1.07	0.00924	0.0392	-1.17445	0.000257088	0.0047087	12.487	12.248	10.559	1.79	3.068	3.592	7.084	2.602	3.025	2.604	3.884	4.077	3.408	12.291	12.111	5.518	8.871	6.074	23.961	14.008
	2010109A12Rik	2010109A12Rik|-|-|5|5 E2|protein-coding	NM_029363	0.047	0.064	0.047	0.2345	#DIV/0!	0.780488	#DIV/0!	#DIV/0!	-0.169369	0.706	1	-0.0103717	0.988	0.992	2.73	0.132	0.233	-0.105686	0.655	1	1.93	0.167	0.322	-2.72851	0.0858604	0.26575	0.141	0	0	0.107	0.099	0	0.05	0.18	0	0	0.055	0	0.379	0.905	0	0.057	0.066	0	0	0.082
	2010109I03Rik	2010109I03Rik|Ly6m|-|15|15 D3|protein-coding	NM_025929	0	0.0155	0.0056	0.0108333	0	0.164894	0.180645	1.35417	-0.386487	0.288	1	-0.296912	0.579	1	2.56	0.466	1	-0.0757537	0.701	1	-0.406	0.827	1	-0.4237	0.870004	1	0	0	0	0	0.01	0.023	0.029	0	0.028	0	0	0	0	0	0.049	0.016	0	0	0.023	0.094
	2010111I01Rik	2010111I01Rik|2300006M17Rik|AP-O|AW742919|Aopep|ApO|mir-23b|mir-24-1|mir-27b|-|13|13 B3|protein-coding	NR_110520	0.729667	1.292	1.4502	2.09467	0.270949	0.293904	0.305434	0.633787	-0.593566	0.0427	0.126	-0.90312	0.015	0.0362	1.29	0.000209	0.000928	0.237484	0.43	0.761	0.637	0.0637	0.165	-0.31842	0.399891	0.637877	0.813	0.549	0.827	0.85	0.993	1.239	2.086	0.653	1.101	0.818	1.938	2.741	0.843	3.31	3.042	1.836	1.627	1.91	2.693	4.396
	2010204K13Rik	2010204K13Rik|0610010M13Rik|Cip7|-|X|X A1.1|ncRNA	NR_027925	2.421	2.359	4.2106	9.78967	1.15231	0.293993	0.239838	0.242811	-0.116954	0.737	0.851	-1.08412	0.000177	0.000687	2.22	3.72e-08	3.2e-07	0.81862	0.00198	0.0285	2.08	9.03e-08	2.06e-06	-1.07636	0.00113744	0.0139639	2.234	3.183	1.846	1.207	2.132	2.614	3.483	4.104	5.062	3.087	4.681	4.119	3.97	15.546	13.125	7.715	9.521	8.861	2.101	8.024
	2010300C02Rik	2010300C02Rik|-|-|1|1 B|protein-coding	NM_028096	5.36333	9.891	9.8844	21.1085	0.546888	0.308544	0.271303	0.884348	-0.89989	0.0181	0.0656	-1.17824	1.61e-07	1.07e-06	2.12	1.33e-11	1.85e-10	0.116571	0.697	0.902	1.06	0.0123	0.0487	-0.911476	0.000866632	0.0114813	6.231	5.861	3.998	2.268	16.669	8.537	12.09	6.575	7.872	10.1	9.818	15.057	10.133	13.67	39.118	16.743	23.466	23.521	9.807	32.057
	2010308F09Rik	2010308F09Rik|-|-|X|X A1.1|ncRNA	NR_045430	0.108667	0.1705	0.1592	0.187167	0.299357	1.2007	1.26349	0.581263	-0.228017	0.639	0.785	-0.389219	0.604	0.718	0.954	0.546	0.674	0.0303746	0.917	0.974	0.195	0.867	0.927	-0.0741469	0.94876	0.979857	0.326	0	0	0	0.115	0.277	0.29	0	0	0.105	0.254	0.437	0.16	0	0.748	0.066	0.076	0.073	0.363	0.142
	2010310C07Rik	2010310C07Rik|-|-|6|6 B2.1|ncRNA	NR_045169	0	0	0	0.0673333	#DIV/0!	#DIV/0!	#DIV/0!	#DIV/0!	NA	1	1	NA	1	1	4.35	0.189	0.309	NA	1	1	3.83	0.213	0.378	-2.8785	0.347181	1	0	0	0	0	0	0	0	0	0	0	0	0	0	0.404	0	0	0	0	0	0
	2010315B03Rik	2010315B03Rik|BC029716|-|9|9 F4|protein-coding	NM_001243117	1.666	2.003	2.4888	1.48867	0.37855	0.684318	0.931089	1.06106	-0.437346	0.0659	0.173	-0.876459	1.03e-05	5.12e-05	0.013	0.976	0.985	0.396477	0.0525	0.261	-0.45	0.264	0.437	0.89443	0.011781	0.0723978	1.733	1.671	1.594	1.892	2.508	2.175	1.437	2.613	2.871	2.469	1.749	2.742	2.353	0.309	1.407	1.753	1.181	1.929	4.401	2.927
	2010320M18Rik	2010320M18Rik|-|-|8|8 B3.3|ncRNA	NR_029440	17.2807	14.9265	16.009	18.2973	1.86435	1.54136	1.838	1.74776	0.0238334	0.925	0.962	-0.196879	0.349	0.485	0.331	0.442	0.578	0.201684	0.349	0.703	0.349	0.381	0.559	-0.119645	0.730883	0.864985	14.604	17.853	19.385	16.936	11.742	11.239	19.789	14.167	12.596	13.376	18.889	21.017	17.286	37.286	18.728	11.965	12.178	12.341	9.269	9.684
	2200002D01Rik	2200002D01Rik|2010005J02Rik|H2RSP|IMUP|IMUP-1|IMUP-2|-|7|7 B1|protein-coding	NM_028179	1.97867	1.38125	1.5788	2.11117	1.79065	0.918384	0.959174	0.876003	0.290777	0.432	0.621	-0.0546994	0.895	0.934	0.294	0.479	0.613	0.266928	0.401	0.743	0.628	0.126	0.265	-0.243591	0.560411	0.755837	1.601	2.402	1.933	1.279	0.895	1.124	2.227	0.584	0.744	2.127	2.258	2.181	1.457	3.621	1.658	1.537	2.35	2.044	1.105	1.504
	2200002J24Rik	2200002J24Rik|-|-|7|7 B1|protein-coding	NM_026961	0	0	0	0.00983333	#DIV/0!	#DIV/0!	#DIV/0!	#DIV/0!	NA	1	1	NA	1	1	1.13	0.75	1	NA	1	1	0.619	0.848	1	0.335438	0.915169	1	0	0	0	0	0	0	0	0	0	0	0	0	0	0	0	0	0.059	0	0	0
	2210010C04Rik	2210010C04Rik|AV072249|-|6|6 B1|protein-coding	NM_023333	0	0	0.005	0.00866667	0	0	#DIV/0!	#DIV/0!	NA	1	1	-0.296912	0.579	1	2.42	0.49	1	0.0614787	0.649	1	1.91	0.55	1	-0.26027	0.933403	1	0	0	0	0	0	0	0	0	0.025	0	0	0	0	0	0.052	0	0	0	0.02	0.021
	2210011C24Rik	2210011C24Rik|-|-|8|8 C2|protein-coding	NM_001291292	0.0373333	0.425	1.2844	0.224833	0.794326	1.33229	2.8105	0.960826	-2.14456	3.12e-05	0.00038	-4.26372	4.2e-14	6.13e-13	2.75	0.00242	0.00814	1.15523	0.000233	0.00546	-0.924	0.0478	0.134	2.58434	8.03e-10	1.5e-07	0.021	0	0.091	0.452	0.278	0.336	0.634	2.272	0.767	0.691	1.254	1.438	0.228	0.251	0.246	0.239	0.158	0.227	0.047	0.319
	2210013O21Rik	2210013O21Rik|AI181827|Thp5|-|X|X F3|protein-coding	NM_027327	20.1627	16.853	15.5214	16.3302	0.688216	0.466571	0.636201	0.410698	0.0756084	0.796	0.885	0.0556478	0.799	0.87	-0.0889	0.791	0.863	0.0246098	0.923	0.977	-0.0115	0.974	0.987	0.0457072	0.8743	0.942827	18.287	22.858	19.343	12.563	10.932	14.781	29.136	18.371	15.473	9.972	17.725	16.066	10.043	26.856	16.784	11.959	17.08	15.259	29.297	36.121
	2210016F16Rik	2210016F16Rik|-|-|13|13 B1|protein-coding	NM_027335	6.32	5.63825	7.0006	9.17033	2.18912	2.53975	2.25317	2.07615	-0.0245294	0.917	0.958	-0.456877	0.0158	0.0378	0.756	0.0189	0.0476	0.401199	0.0395	0.22	0.724	0.0163	0.0602	-0.278951	0.280229	0.527209	5.608	6.182	7.17	6.881	4.357	4.985	6.33	8.491	6.826	5.921	7.412	6.353	7.599	14.495	6.737	9.33	8.474	8.387	2.887	2.22
	2210016L21Rik	2210016L21Rik|-|-|5|5 F|protein-coding	NM_028211	61.865	41.312	39.6946	68.7985	0.904115	0.546484	0.589133	0.826041	0.383032	0.0576	0.157	0.307912	0.027	0.0598	0.34	0.191	0.312	0.0811807	0.642	0.876	0.734	0.00382	0.0197	-0.64506	0.00259846	0.0255709	63.91	64.02	57.665	33.607	35.468	39.296	56.877	32.581	40.583	37.54	44.208	43.561	44.19	84.461	99.325	52.566	69.657	62.592	68.426	75.596
	2210019I11Rik	2210019I11Rik|-|-|5|5 G3|ncRNA	NR_038157	0	0	0	0	#DIV/0!	#DIV/0!	#DIV/0!	#DIV/0!	NA	1	1	NA	1	1	NA	1	1	NA	1	1	NA	1	1	NA	1	1	0	0	0	0	0	0	0	0	0	0	0	0	0	0	0	0	0	0	0	0
	2210039B01Rik	2210039B01Rik|-|-|12|12 C3|ncRNA	NR_044985	0	0	0	0	#DIV/0!	#DIV/0!	#DIV/0!	#DIV/0!	NA	1	1	NA	1	1	NA	1	1	NA	1	1	NA	1	1	NA	1	1	0	0	0	0	0	0	0	0	0	0	0	0	0	0	0	0	0	0	0	0
	2210404E10Rik	2210404E10Rik|-|-|19|19 A|ncRNA	NR_131163	0	0	0	0	#DIV/0!	0	#DIV/0!	#DIV/0!	NA	1	1	NA	1	1	NA	1	1	NA	1	1	NA	1	1	NA	1	1	0	0	0	0	0	0	0	0	0	0	0	0	0	0	0	0	0	0	0	0.038
	2210406O10Rik	2210406O10Rik|-|-|5|5 B3|ncRNA	NR_126489	0.291333	0.368	0.3658	0.570333	0.385872	0.421053	0.196984	0.26814	-0.348566	0.466	0.65	-0.524848	0.383	0.519	1.12	0.0398	0.0886	0.118029	0.726	0.913	0.627	0.115	0.25	-0.423179	0.352028	0.595754	0.113	0.233	0.528	0.268	0.3	0.341	0.563	0	0.262	0.307	0.587	0.673	0.332	0.782	0.6	0.607	0.597	0.504	0.755	0.874
	2210407C18Rik	2210407C18Rik|Ep1|-|11|11 B1.3|protein-coding	NM_144544	0	0.02375	0	0	#DIV/0!	0.232843	#DIV/0!	#DIV/0!	-0.233497	0.442	1	NA	1	1	NA	1	1	-0.0426915	0.754	1	-2.01	0.526	1	NA	1	1	0	0	0	0.045	0	0.05	0	0	0	0	0	0	0	0	0	0	0	0	0	0.102
	2210408F21Rik	2210408F21Rik|-|-|6|6 A3.3|ncRNA	NR_040262	0.485	1.765	5.0288	6.62283	0.612374	0.333711	0.560499	0.431455	-1.6092	0.000219	0.00193	-3.41421	1.91e-17	3.82e-16	3.96	3.3e-14	6.01e-13	1.36979	1.34e-07	1.04e-05	1.9	5.71e-07	1.11e-05	-0.240457	0.463176	0.686836	0.226	1.055	0.174	1.347	1.245	1.613	2.855	4.459	5.856	3.246	6.499	5.084	3.928	12.086	9.712	3.857	5.13	5.024	0.792	5.289
	2210408I21Rik	2210408I21Rik|-|-|13|13 C1|protein-coding	NM_001145676	1.87833	1.19425	0.8782	0.857667	0.602416	0.544077	0.387726	0.572541	0.438979	0.0551	0.152	0.747723	0.000176	0.000683	-0.949	3.97e-05	0.000208	-0.268205	0.183	0.526	-0.49	0.0375	0.113	0.192713	0.367329	0.609518	2.166	1.91	1.559	0.867	1.598	1.169	1.143	0.911	0.972	1.035	0.683	0.79	0.984	0.452	0.888	0.875	0.963	0.984	3.118	2.195
	2210409D07Rik	2210409D07Rik|-|-|18|18 D3|ncRNA	NR_045360	0	0	0.0662	0.0363333	#DIV/0!	#DIV/0!	0.513178	#DIV/0!	NA	1	1	-0.513912	0.391	0.526	2.3	0.514	1	0.107465	0.479	1	1.79	0.577	1	0.650668	0.76062	1	0	0	0	0	0	0	0	0.214	0.117	0	0	0	0	0	0	0.068	0	0.15	0	0
	2210409E12Rik	2210409E12Rik|AU021711|C76890|OTTMUSG00000001303|-|11|11 C|pseudo	NR_003492	0	0	0	0	#DIV/0!	#DIV/0!	#DIV/0!	#DIV/0!	NA	1	1	NA	1	1	NA	1	1	NA	1	1	NA	1	1	NA	1	1	0	0	0	0	0	0	0	0	0	0	0	0	0	0	0	0	0	0	0	0
	2210414B05Rik	2210414B05Rik|-|-|4|4 A1|ncRNA	NR_040643	0	0	0	0.0035	#DIV/0!	#DIV/0!	#DIV/0!	#DIV/0!	NA	1	1	NA	1	1	1.13	0.75	1	NA	1	1	0.619	0.848	1	0.335438	0.915169	1	0	0	0	0	0	0	0	0	0	0	0	0	0	0	0.021	0	0	0	0	0
	2210416O15Rik	2210416O15Rik|-|-|11|11 C|ncRNA	NR_045499	0.175	0.242	0.6322	0.882	0.770925	2.05085	4.02675	9.69231	-0.48739	0.285	0.475	-1.98776	1.91e-06	1.09e-05	2.55	6.32e-07	4.55e-06	1.07943	0.00055	0.0105	1.91	6.28e-05	0.000668	-0.370832	0.365707	0.608113	0.216	0.158	0.151	0.116	0.251	0.202	0.399	0.716	0.319	0.525	0.873	0.728	0.524	1.663	0.504	0.883	0.785	0.933	0.227	0.118
	2210417A02Rik	2210417A02Rik|AV081004|-|5|5 G3|ncRNA	NR_028285	0	0	0	0	#DIV/0!	#DIV/0!	#DIV/0!	#DIV/0!	NA	1	1	NA	1	1	NA	1	1	NA	1	1	NA	1	1	NA	1	1	0	0	0	0	0	0	0	0	0	0	0	0	0	0	0	0	0	0	0	0
	2210418O10Rik	2210418O10Rik|Gm6182|-|2|2 H4|protein-coding	NM_001305136	0	0	0	0	#DIV/0!	#DIV/0!	#DIV/0!	0	NA	1	1	NA	1	1	NA	1	1	NA	1	1	NA	1	1	NA	1	1	0	0	0	0	0	0	0	0	0	0	0	0	0	0	0	0	0	0	0	0
	2210420H20Rik	2210420H20Rik|-|-|18|18 E3|ncRNA	NR_045389	0	0	0	0	#DIV/0!	#DIV/0!	#DIV/0!	#DIV/0!	NA	1	1	NA	1	1	NA	1	1	NA	1	1	NA	1	1	NA	1	1	0	0	0	0	0	0	0	0	0	0	0	0	0	0	0	0	0	0	0	0
	2300002M23Rik	2300002M23Rik|Stg|emprin|-|17|17 B1|protein-coding	NM_175148	0	0.009	0	0	#DIV/0!	#DIV/0!	0	#DIV/0!	-0.142496	0.61	1	NA	1	1	NA	1	1	-0.0161866	0.905	1	-1.28	0.691	1	NA	1	1	0	0	0	0	0.014	0	0.022	0	0	0	0	0	0	0	0	0	0	0	0	0
	2300003K06Rik	2300003K06Rik|-|-|11|11 D|protein-coding	NM_001195383	0	0	0	0	#DIV/0!	#DIV/0!	#DIV/0!	#DIV/0!	NA	1	1	NA	1	1	NA	1	1	NA	1	1	NA	1	1	NA	1	1	0	0	0	0	0	0	0	0	0	0	0	0	0	0	0	0	0	0	0	0
	2300009A05Rik	2300009A05Rik|-|-|9|9 C|protein-coding	NM_027090	5.517	5.96525	4.812	4.43633	0.719484	0.553055	0.518926	0.630251	-0.279419	0.29	0.481	-0.129227	0.67	0.773	-0.116	0.682	0.782	-0.135748	0.606	0.858	-0.42	0.131	0.273	0.253911	0.38844	0.628687	4.886	6.115	5.55	6.112	4.107	5.762	7.88	4.107	3.496	3.285	7.769	5.403	3.813	6.172	4.132	3.941	3.963	4.597	7.668	10.786
	2310001H17Rik	2310001H17Rik|AI646108|-|6|6 F3|ncRNA	NR_040268	0.0113333	0	0	0	0.0750552	0	0	0	0.0334247	0.905	1	-0.0715375	0.894	1	0.166	0.963	1	NA	1	1	0.619	0.848	1	0.335438	0.915169	1	0.034	0	0	0	0	0	0	0	0	0	0	0	0	0	0	0	0	0	0.151	0.039
	2310001K24Rik	2310001K24Rik|-|-|2|2 H3|ncRNA	NR_028122	0	0.09875	0	0	0	#DIV/0!	#DIV/0!	#DIV/0!	-0.565283	0.173	1	NA	1	1	NA	1	1	-0.184547	0.313	1	-3.24	0.161	1	NA	1	1	0	0	0	0.297	0.039	0	0.059	0	0	0	0	0	0	0	0	0	0	0	0.186	0
	2310002D06Rik	2310002D06Rik|-|-|12|12 C3|ncRNA	NR_045490	0.165333	0.15475	0.1166	0.0771667	0.653491	0.706621	0.399315	0.161437	-0.0684356	0.898	0.947	-0.0276963	0.97	0.982	-0.991	0.483	0.616	-0.0275477	0.927	0.978	-1.14	0.392	0.57	0.995686	0.461233	1	0.076	0.298	0.122	0.269	0.178	0.172	0	0	0.211	0.195	0.177	0	0	0	0.183	0	0.212	0.068	0.253	0.219
	2310002F09Rik	2310002F09Rik|-|-|7|7 B3|ncRNA	NR_077063	0.0673333	0.0545	0.0076	0.023	0.103431	0.251152	0.0938272	0.258427	0.0853378	0.873	0.932	1.22844	1	1	-1.49	0.238	0.367	-0.391366	0.14	0.462	-1.29	0.291	0.469	-0.902751	0.55503	1	0.015	0.025	0.162	0	0.084	0.017	0.117	0	0	0.026	0.012	0	0	0.03	0.029	0.012	0	0.067	0.651	0.217
	2310002L09Rik	2310002L09Rik|2310003M01Rik|AV083437|-|4|4 C3|protein-coding	NM_027104	0.06	0	0	0	#DIV/0!	0	#DIV/0!	#DIV/0!	0.333651	1	1	0.403932	1	1	-3.26	0.334	1	NA	1	1	NA	1	1	NA	1	1	0	0.18	0	0	0	0	0	0	0	0	0	0	0	0	0	0	0	0	0	0.047
	2310003N18Rik	2310003N18Rik|-|-|9|9 A5.3|ncRNA	NR_131161	0.015	0.05325	0.0846	0.0938333	#DIV/0!	#DIV/0!	#DIV/0!	0.710859	-0.215614	0.557	1	-0.784891	0.275	0.408	2.62	0.202	0.324	0.108679	0.649	1	0.743	0.642	0.777	0.0784753	0.955175	1	0	0	0.045	0	0.118	0.095	0	0.214	0	0.144	0.065	0	0	0	0.04	0.135	0.313	0.075	0	0
	2310005A03Rik	2310005A03Rik|-|-|2|2 H1|ncRNA	NR_040634	0.00466667	0	0	0.00216667	#DIV/0!	0	0	#DIV/0!	0.0334247	0.905	1	-0.0715375	0.894	1	0.166	0.963	1	NA	1	1	0.619	0.848	1	0.335438	0.915169	1	0.014	0	0	0	0	0	0	0	0	0	0	0	0	0	0.013	0	0	0	0	0.016
	2310005E17Rik	2310005E17Rik|-|-|13|13 D1|ncRNA	NR_045498	0	0	0	0	0	#DIV/0!	#DIV/0!	#DIV/0!	NA	1	1	NA	1	1	NA	1	1	NA	1	1	NA	1	1	NA	1	1	0	0	0	0	0	0	0	0	0	0	0	0	0	0	0	0	0	0	0.072	0
	2310007B03Rik	2310007B03Rik|-|-|1|1 D|protein-coding	NM_001159940	0	0.012	0.039	0.00516667	#DIV/0!	0.307692	#DIV/0!	0.738095	-0.404353	0.274	1	-1.57096	0.0344	0.0735	1.66	0.638	1	0.290387	0.301	0.657	-1.44	0.488	1	3.08971	0.0572841	1	0	0	0	0.008	0.016	0	0.024	0.128	0.023	0.014	0	0.03	0	0	0	0	0.031	0	0	0.039
	2310008N11Rik	2310008N11Rik|-|-|8|8 A2|ncRNA	NR_045904	0	0.01225	0	0	0	#DIV/0!	#DIV/0!	#DIV/0!	-0.0897196	0.748	1	NA	1	1	NA	1	1	0.00913838	0.946	1	-0.583	0.857	1	NA	1	1	0	0	0	0	0	0	0.049	0	0	0	0	0	0	0	0	0	0	0	0.076	0
	2310009A05Rik	2310009A05Rik|5031420N21Rik|-|9|9 D|protein-coding	NM_001308425	14.6197	11.6427	9.9976	9.18267	2.17944	1.30641	1.12751	0.898851	0.120639	0.643	0.789	0.239958	0.241	0.368	-0.447	0.196	0.317	-0.097321	0.654	0.881	-0.324	0.328	0.507	0.223273	0.426649	0.659375	12.383	16.283	15.193	15.493	8.915	9.628	12.535	10.252	10.864	8.082	9.203	11.587	8.396	15.499	8.762	7.281	7.711	7.447	6.708	8.912
	2310009B15Rik	2310009B15Rik|-|-|1|1 E4|protein-coding	NM_001081226	3.09767	3.8415	3.1912	3.698	0.653792	0.867939	0.601206	0.580169	-0.42703	0.209	0.387	-0.355254	0.322	0.458	0.515	0.353	0.49	-0.081331	0.788	0.931	0.0199	0.97	0.984	-0.1341	0.784369	0.894911	2.8	2.962	3.531	3.533	1.807	4.593	5.433	1.724	3.01	1.912	5.208	4.102	1.918	9.749	2.804	2.34	3.025	2.352	4.738	4.426
	2310010J17Rik	2310010J17Rik|-|-|7|7 D3|ncRNA	NR_046007	1.031	1.838	2.015	3.139	0.364311	1.00547	0.571631	0.542986	-0.781415	0.0818	0.201	-1.14298	0.0207	0.0474	1.81	0.000407	0.00169	0.20585	0.513	0.813	0.784	0.0543	0.147	-0.486052	0.215345	0.454385	1.27	0.343	1.48	2.117	1.145	1.267	2.823	0.779	1.558	1.744	3.088	2.906	2.689	5.327	2.896	2.703	3.131	2.088	2.83	1.828
	2310011J03Rik	2310011J03Rik|AI452186|AW545358|-|10|10 C1|protein-coding	NM_025521	19.383	18.2018	24.0558	32.1265	2.05895	1.2286	1.44862	1.70324	-0.0847823	0.725	0.844	-0.613361	0.00743	0.0196	0.951	0.0058	0.0175	0.473352	0.0357	0.207	0.855	0.00847	0.0367	-0.31292	0.286399	0.534434	16.511	20.35	21.288	17.503	13.267	16.335	25.702	20.108	21.781	16.356	31.627	30.407	22.928	55.972	32.395	27.117	27.33	27.017	9.414	14.815
	2310015A10Rik	2310015A10Rik|5330419I17Rik|-|12|12 C3|ncRNA	NR_033514	1.99567	2.29875	2.614	2.23567	1.36783	1.33882	1.48692	1.67215	-0.367205	0.0977	0.229	-0.689753	0.000989	0.00325	0.36	0.118	0.213	0.292051	0.144	0.467	-0.0291	0.893	0.942	0.351974	0.0815808	0.25706	1.747	2.095	2.145	2.045	2.13	1.906	3.114	2.378	2.287	1.95	3.099	3.356	2.026	2.755	2.31	2.131	2.063	2.129	1.459	1.717
	2310015D24Rik	2310015D24Rik|-|-|16|16 A1|ncRNA	NR_037997	0.00233333	0.00475	0.014	0.00833333	0.0402299	0.206522	0.466667	0.134409	-0.080283	0.777	1	-0.694774	0.313	0.449	1.83	0.526	1	0.133073	0.493	1	0.688	0.787	1	0.909486	0.641852	1	0.007	0	0	0	0	0	0.019	0	0	0.023	0	0.047	0	0	0.038	0	0.012	0	0.058	0.023
	2310016D03Rik	2310016D03Rik|-|-|12|12 A2|ncRNA	NR_045491	0	0	0	0	#DIV/0!	#DIV/0!	#DIV/0!	#DIV/0!	NA	1	1	NA	1	1	NA	1	1	NA	1	1	NA	1	1	NA	1	1	0	0	0	0	0	0	0	0	0	0	0	0	0	0	0	0	0	0	0	0
	2310020H05Rik	2310020H05Rik|-|-|13|13 D1|ncRNA	NR_045495	0.0983333	0.019	0.0274	0.0195	1.63889	0.121795	0.33012	0.928571	0.394771	0.357	1	0.617375	0.379	0.515	-2.12	0.25	0.382	-0.00116675	0.994	1	-0.145	0.95	1	0.0671023	0.975839	1	0.054	0.241	0	0	0.076	0	0	0.137	0	0	0	0	0	0	0.026	0.043	0	0.048	0.06	0.156
	2310022A10Rik	2310022A10Rik|-|-|7|7 A3|protein-coding	NM_001122767	6.51033	5.51125	5.247	8.17783	0.756224	0.698954	0.532961	0.750811	0.0548658	0.777	0.874	0.024337	0.884	0.927	0.413	0.0217	0.0535	0.0271779	0.88	0.964	0.467	0.0121	0.0481	-0.43559	0.00978532	0.0641313	6.874	6.688	5.969	4.75	4.456	5.787	7.052	3.822	4.685	5.339	6.198	6.191	4.771	8.354	10.01	7.932	9.339	8.661	8.609	7.885
	2310022B05Rik	2310022B05Rik|-|-|8|8 E2|protein-coding	NM_175149	110.263	152.646	146.932	184.433	4.01247	5.73706	5.36857	4.86465	-0.644683	2.02e-05	0.000266	-0.72821	2.28e-07	1.48e-06	0.944	6.23e-06	3.79e-05	0.0760082	0.566	0.841	0.282	0.126	0.265	-0.202431	0.228678	0.467839	106.031	113.338	111.419	146.677	143.121	155.331	165.455	143.36	123.282	133.866	166.957	167.197	169.936	221.658	178.164	183.9	185.045	167.898	27.48	26.607
	2310030A07Rik	2310030A07Rik|-|-|1|1 G1|ncRNA	NR_040603	0	0	0	0	#DIV/0!	#DIV/0!	#DIV/0!	#DIV/0!	NA	1	1	NA	1	1	NA	1	1	NA	1	1	NA	1	1	NA	1	1	0	0	0	0	0	0	0	0	0	0	0	0	0	0	0	0	0	0	0	0
	2310030G06Rik	2310030G06Rik|2610024D04Rik|AV017521|-|9|9 A5.3|protein-coding	NM_025865	0.501	0.235	0.1324	0.517	0.36357	0.159755	0.135517	0.192408	0.643673	0.172	0.341	1.30921	0.018	0.042	0.274	0.68	0.78	-0.338283	0.325	0.68	1.15	0.0811	0.196	-1.83395	0.0055535	0.0432597	0.803	0.417	0.283	0.126	0.348	0.07	0.396	0.158	0.043	0.199	0.096	0.166	0.121	1.162	0.762	0.374	0.462	0.221	1.378	1.471
	2310033P09Rik	2310033P09Rik|Mmtag2|-|11|11 B1.3|protein-coding	NM_024210	9.464	7.64475	7.0994	8.163	1.03749	0.976715	0.925003	1.24058	0.122421	0.538	0.709	0.0882681	0.64	0.748	-0.0379	0.858	0.908	0.0379507	0.815	0.942	0.0845	0.634	0.773	-0.0463016	0.78728	0.895975	9.021	8.618	10.753	7.155	6.844	8.053	8.527	5.783	5.748	7.812	7.951	8.203	6.276	8.896	10.156	7.601	7.267	8.782	9.122	7.827
	2310034C09Rik	2310034C09Rik|-|-|16|16 C3.3|protein-coding	NM_054100	0	0	0	0	#DIV/0!	#DIV/0!	#DIV/0!	#DIV/0!	NA	1	1	NA	1	1	NA	1	1	NA	1	1	NA	1	1	NA	1	1	0	0	0	0	0	0	0	0	0	0	0	0	0	0	0	0	0	0	0	0
	2310034G01Rik	2310034G01Rik|-|-|19|19 C3|ncRNA	NR_040418	0.644667	0.7515	0.8194	1.1615	1.08347	1.40467	0.912472	1.08147	-0.33801	0.379	0.573	-0.496888	0.275	0.407	1.12	0.0755	0.149	0.102399	0.748	0.919	0.701	0.212	0.378	-0.505759	0.365009	0.60746	0.655	0.546	0.733	0.863	0.501	0.881	0.761	1.488	0.744	0.354	0.643	0.868	0.88	3.218	0.75	0.705	0.635	0.781	0.595	0.535
	2310034O05Rik	2310034O05Rik|-|-|5|5 E4|ncRNA	NR_040679	0.0306667	0.03025	0	0.0198333	0.264368	0.3025	0	0.360606	-0.0125892	0.979	1	0.287241	0.599	1	-0.608	0.759	0.841	-0.116967	0.487	1	-0.669	0.679	0.806	-1.18761	0.673124	1	0.017	0	0.075	0	0.033	0.039	0.049	0	0	0	0	0	0	0	0	0.056	0.032	0.031	0.116	0.1
	2310035C23Rik	2310035C23Rik|6430401N10|Kiaa1468|mKIAA1468|-|1 E2.1|1|protein-coding	NM_029349	6.20467	4.838	3.4542	3.40467	0.402456	0.338867	0.281952	0.320892	0.15935	0.463	0.648	0.502331	0.00622	0.0167	-0.718	0.00619	0.0185	-0.31158	0.0924	0.368	-0.552	0.029	0.0927	0.213528	0.340532	0.585466	7.125	6.629	4.86	3.62	6.024	5.465	4.243	3.717	3.895	3.858	2.492	3.309	2.262	1.625	3.827	4.396	4.553	3.765	15.417	14.277
	2310036O22Rik	2310036O22Rik|1110002H14Rik|AI854688|-|8|8 C3|protein-coding	NM_026760	75.3493	56.263	52.7738	63.3888	1.08507	0.984772	1.0694	1.20426	0.232191	0.334	0.526	0.198375	0.353	0.489	-0.0207	0.955	0.971	0.0387727	0.853	0.956	0.218	0.514	0.678	-0.173481	0.556651	0.753169	67.858	68.041	90.149	54.087	44.696	46.988	79.281	38.949	43.761	48.281	66.598	66.28	60.467	109.974	63.689	41.95	50.189	54.064	69.442	57.133
	2310039H08Rik	2310039H08Rik|-|-|17|17 C|protein-coding	NM_025966	11.2827	7.02525	6.358	8.955	1.50075	1.07502	1.56794	2.3424	0.477763	0.0683	0.177	0.488588	0.0375	0.079	-0.078	0.865	0.913	0.00687234	0.976	0.992	0.423	0.317	0.495	-0.417785	0.268125	0.514142	9.374	11.389	13.085	6.127	5.009	7.033	9.932	5.07	5.739	5.43	8.546	7.005	7.877	19.879	7.742	6.361	5.976	5.895	7.518	6.535
	2310039L15Rik	2310039L15Rik|-|-|10|10 C2|ncRNA	NR_045337	0	0.021	0	0	#DIV/0!	0.304348	#DIV/0!	#DIV/0!	-0.184404	0.51	1	NA	1	1	NA	1	1	-0.0300574	0.825	1	-1.54	0.63	1	NA	1	1	0	0	0	0	0.084	0	0	0	0	0	0	0	0	0	0	0	0	0	0	0.069
	2310040G24Rik	2310040G24Rik|-|-|6|6 D1|ncRNA	NR_040293	1.873	0.95125	1.2044	1.34033	0.472741	0.635438	0.560186	0.386152	0.7657	0.03	0.0965	0.451738	0.252	0.381	-0.296	0.575	0.698	0.27283	0.393	0.738	0.58	0.264	0.437	-0.165367	0.744673	0.872858	1.847	2.118	1.654	1.098	0.851	0.316	1.54	2.137	0.291	0.718	1.63	1.246	0.649	2.897	2.021	1.068	0.846	0.561	3.962	1.497
	2310043L19Rik	2310043L19Rik|-|-|1|1 H4|ncRNA	NR_037994	0	0.034	0.0196	0.00733333	0	0.152466	0.230588	0.112821	-0.288052	0.375	1	-0.296912	0.579	1	1.13	0.75	1	-0.0551333	0.757	1	-1.82	0.479	1	1.03459	0.741676	1	0	0	0	0.084	0.052	0	0	0	0	0	0	0.098	0	0	0	0.044	0	0	0.061	0.223
	2310043O21Rik	2310043O21Rik|-|-|15|15 B3.1|ncRNA	NR_045757	0	0	0	0.015	0	#DIV/0!	#DIV/0!	#DIV/0!	NA	1	1	NA	1	1	1.8	0.611	1	NA	1	1	1.29	0.689	1	-0.334342	0.915253	1	0	0	0	0	0	0	0	0	0	0	0	0	0	0	0.09	0	0	0	0.069	0
	2310045n01rik-mef2b	2310045n01rik-mef2b|-|-|8 B3.3|protein-coding	NM_001310055	2.78733	1.33125	1.2168	1.68817	4.5769	1.775	2.11617	2.9669	0.800566	0.00229	0.0129	0.841743	0.000269	0.00101	-0.508	0.0923	0.175	-0.0106254	0.964	0.989	0.345	0.258	0.43	-0.355745	0.190432	0.424267	2.595	3.074	2.693	1.755	1.166	1.042	1.362	1.206	0.865	1.45	1.142	1.421	2.252	1.941	1.884	1.382	1.183	1.487	0.609	0.75
	2310050C09Rik	2310050C09Rik|-|-|3|3 F1|protein-coding	NM_025621	0	0	0	0	#DIV/0!	#DIV/0!	#DIV/0!	#DIV/0!	NA	1	1	NA	1	1	NA	1	1	NA	1	1	NA	1	1	NA	1	1	0	0	0	0	0	0	0	0	0	0	0	0	0	0	0	0	0	0	0	0
	2310057J18Rik	2310057J18Rik|2210414P04Rik|Leg1|-|10|10 A4|protein-coding	NM_026336	0	0	0	0	#DIV/0!	#DIV/0!	#DIV/0!	#DIV/0!	NA	1	1	NA	1	1	NA	1	1	NA	1	1	NA	1	1	NA	1	1	0	0	0	0	0	0	0	0	0	0	0	0	0	0	0	0	0	0	0	0
	2310057M21Rik	2310057M21Rik|3110040E10Rik|AI429544|-|7|7 F3|protein-coding	NM_026655	3.413	2.33875	2.2236	3.23467	0.467919	0.318371	0.322729	0.428603	0.33757	0.113	0.254	0.278788	0.154	0.257	0.0808	0.734	0.821	0.0673491	0.681	0.895	0.431	0.0381	0.114	-0.35889	0.067663	0.228597	3.714	3.975	2.55	1.875	2.488	2.475	2.517	2.256	2.462	2.334	1.93	2.136	1.977	2.124	4.509	3.337	4.026	3.435	7.294	7.346
	2310057N15Rik	2310057N15Rik|Krtap13-1|-|16|16 C3.3|protein-coding	NM_027170	0	0	0	0	#DIV/0!	#DIV/0!	#DIV/0!	#DIV/0!	NA	1	1	NA	1	1	NA	1	1	NA	1	1	NA	1	1	NA	1	1	0	0	0	0	0	0	0	0	0	0	0	0	0	0	0	0	0	0	0	0
	2310061I04Rik	2310061I04Rik|-|-|17|17 B1|protein-coding	NM_001033630	19.5543	19.9705	17.4824	24.7215	0.793762	0.660619	0.72322	0.967233	-0.209886	0.245	0.431	-0.15893	0.257	0.387	0.533	0.0125	0.0335	-0.0518999	0.702	0.903	0.312	0.101	0.229	-0.366252	0.0245857	0.118468	17.933	20.411	20.319	18.864	17.4	21.064	22.554	15.764	16.25	17.38	18.343	19.675	20.407	29.757	23.609	24.277	24.292	25.987	24.635	30.23
	2310061N02Rik	2310061N02Rik|-|-|16|16 C3.3|protein-coding	NM_027155	0	0	0	0	#DIV/0!	#DIV/0!	#DIV/0!	#DIV/0!	NA	1	1	NA	1	1	NA	1	1	NA	1	1	NA	1	1	NA	1	1	0	0	0	0	0	0	0	0	0	0	0	0	0	0	0	0	0	0	0	0
	2310065F04Rik	2310065F04Rik|linc-Myh|-|11|11 B3|ncRNA	NR_038055	0.0126667	0.044	0.0238	0.0141667	0.269504	0.536585	0.313158	0.833333	-0.73089	0.166	0.333	-0.550762	0.465	0.597	0.185	0.923	0.951	-0.228914	0.489	0.797	-1.61	0.114	0.249	0.971491	0.4156	1	0	0	0.038	0.029	0.053	0.064	0.03	0.036	0.02	0.03	0.033	0	0	0	0.048	0.011	0.013	0.013	0.047	0.082
	2310068J16Rik	2310068J16Rik|-|-|15|15 F1|ncRNA	NR_028124	0.327	0.21625	0.225	0.340333	1.07566	0.908613	0.56962	0.870418	0.334201	0.473	0.656	0.224822	0.658	0.762	0.259	0.612	0.73	0.108269	0.75	0.92	0.704	0.172	0.328	-0.509698	0.300842	0.549565	0.307	0.269	0.405	0.139	0.144	0.193	0.389	0.261	0.238	0.249	0.133	0.244	0.351	0.574	0.346	0.275	0.191	0.305	0.304	0.238
	2310069B03Rik	2310069B03Rik|-|-|6|6 C3|ncRNA	NR_040520	0	0	0	0	#DIV/0!	#DIV/0!	#DIV/0!	#DIV/0!	NA	1	1	NA	1	1	NA	1	1	NA	1	1	NA	1	1	NA	1	1	0	0	0	0	0	0	0	0	0	0	0	0	0	0	0	0	0	0	0	0
	2310069G16Rik	2310069G16Rik|-|-|15|15 B3.2|ncRNA	NR_040309	3.577	3.323	3.659	2.66967	0.63875	0.804795	0.987851	0.744677	-0.0785924	0.793	0.884	-0.339684	0.141	0.239	-0.234	0.37	0.507	0.226411	0.342	0.697	-0.324	0.248	0.419	0.591456	0.00475456	0.0384916	2.912	4.053	3.766	4.136	1.963	3.581	3.612	3.181	3.533	3.168	3.882	4.531	2.681	2.86	2.299	3.191	2.325	2.662	5.6	4.129
	2310075C17Rik	2310075C17Rik|-|-|9|9 F3|ncRNA	NR_131053	0.128	0.09425	0.0876	0.042	0.335958	0.47601	0.442424	0.311111	0.0615378	0.886	0.94	0.163242	0.821	0.885	-1.46	0.555	0.68	-0.0229874	0.921	1	-1.17	0.556	0.713	0.96533	0.597404	1	0.384	0	0	0	0	0.194	0.183	0.218	0	0	0.067	0.153	0	0.169	0.083	0	0	0	0.381	0.198
	2310079G19Rik	2310079G19Rik|-|-|16|16 C3.3|protein-coding	NM_027173	0	0	0	0	#DIV/0!	#DIV/0!	#DIV/0!	#DIV/0!	NA	1	1	NA	1	1	NA	1	1	NA	1	1	NA	1	1	NA	1	1	0	0	0	0	0	0	0	0	0	0	0	0	0	0	0	0	0	0	0	0
	2310081J21Rik	2310081J21Rik|-|-|13|13 A5|ncRNA	NR_045474	0	0	0	0	#DIV/0!	#DIV/0!	#DIV/0!	#DIV/0!	NA	1	1	NA	1	1	NA	1	1	NA	1	1	NA	1	1	NA	1	1	0	0	0	0	0	0	0	0	0	0	0	0	0	0	0	0	0	0	0	0
	2400006E01Rik	2400006E01Rik|lncRNA-JADE|-|3|3 B|ncRNA	NR_130791	0	0	0	0	#DIV/0!	#DIV/0!	#DIV/0!	#DIV/0!	NA	1	1	NA	1	1	NA	1	1	NA	1	1	NA	1	1	NA	1	1	0	0	0	0	0	0	0	0	0	0	0	0	0	0	0	0	0	0	0	0
	2410002F23Rik	2410002F23Rik|-|-|7|7 B3|protein-coding	NM_025880	18.1907	10.3238	7.7876	12.8238	0.736077	0.527718	0.577287	0.697592	0.595654	0.00808	0.0352	0.870615	2.51e-07	1.62e-06	-0.312	0.266	0.399	-0.237271	0.2	0.549	0.308	0.249	0.42	-0.565192	0.0124302	0.0748979	21.572	18.815	14.185	8.085	8.215	11.457	13.538	7.02	7.687	7.267	9.216	7.748	6.629	15.968	16.277	11.36	14.727	11.982	24.713	19.563
	2410003L11Rik	2410003L11Rik|-|-|11|11 D|ncRNA	NR_045496	0	0.0075	0.035	0.0151667	#DIV/0!	0.208333	0.729167	0.303333	-0.0897196	0.748	1	-0.384754	0.473	1	1.8	0.611	1	0.0685129	0.635	1	0.567	0.86	1	1.20731	0.698215	1	0	0	0	0	0.03	0	0	0	0.175	0	0	0	0	0	0.091	0	0	0	0	0.036
	2410004B18Rik	2410004B18Rik|4930572C24Rik|-|3|3 H2|protein-coding	NM_025555	22.9973	16.214	19.9298	15.9482	0.756193	0.694866	1.07409	0.901332	0.300341	0.154	0.316	-0.114126	0.484	0.612	-0.335	0.0879	0.168	0.402461	0.0163	0.127	-0.0272	0.885	0.937	0.458486	0.00237363	0.02387	20.474	27.298	21.22	16.453	13.168	15.007	20.228	18.211	18.938	17.562	20.934	24.004	15.227	16.988	18.646	15.592	13.754	15.482	30.412	23.334
	2410004I01Rik	2410004I01Rik|-|-|11|11 E1|ncRNA	NR_037963	0.954333	0.8565	1.3648	0.912	0.735234	2.29625	3.66882	2.20823	0.0055609	0.988	0.995	-0.761627	0.0636	0.124	0.139	0.778	0.854	0.61122	0.0442	0.236	0.132	0.762	0.863	0.702426	0.101806	0.295577	0.582	1.198	1.083	0.612	0.622	1.276	0.916	0.718	1.792	0.707	1.597	2.01	0.571	1.788	1.029	0.875	0.563	0.646	1.298	0.373
	2410004P03Rik	2410004P03Rik|-|-|12|12 A1.1|protein-coding	NM_001201333	1.94	1.827	0.9684	1.6035	1.33059	2.09278	2.21602	1.60511	-0.0451266	0.912	0.955	0.658071	0.176	0.287	-0.0502	0.925	0.952	-0.4517	0.184	0.526	-0.111	0.839	0.912	-0.674174	0.223514	0.463049	1.559	1.497	2.764	0.443	1.454	2.646	2.765	2.562	0.213	0.571	0.833	0.663	2.233	2.394	1.074	1.899	0.326	1.695	1.458	0.873
	2410006H16Rik	2410006H16Rik|-|-|11|11 B2|ncRNA	NR_030738	18.455	16.9957	14.3456	23.9692	0.608293	0.632188	0.596987	0.454538	-0.0529417	0.852	0.918	0.0487495	0.859	0.912	0.632	0.22	0.346	-0.0895017	0.733	0.915	0.566	0.24	0.41	-0.674748	0.121254	0.327576	15.829	18.571	20.965	15.796	10.937	14.632	26.618	11.129	9.692	10.535	20.307	20.065	13.835	58.846	28.047	12.969	16.271	13.847	30.339	26.884
	2410012E07Rik	2410012E07Rik|-|-|14|14 D2|ncRNA	NR_045939	0.00466667	0	0	0	0.150538	#DIV/0!	#DIV/0!	#DIV/0!	0.0334247	0.905	1	-0.0715375	0.894	1	-0.315	0.929	1	NA	1	1	NA	1	1	NA	1	1	0.014	0	0	0	0	0	0	0	0	0	0	0	0	0	0	0	0	0	0.031	0
	2410015M20Rik	2410015M20Rik|Mic13|QIL1|sr104|-|17|17 D|protein-coding	NM_153152	69.949	75.8097	86.5646	124.114	1.68833	1.497	1.5076	1.34905	-0.278754	0.288	0.479	-0.611889	0.00477	0.0132	1.08	0.0191	0.048	0.288887	0.193	0.541	0.771	0.0704	0.177	-0.440029	0.235138	0.475959	56.038	73.375	80.434	75.925	46.153	82.658	98.503	99.939	79.975	60.482	103.634	88.793	74.107	284.137	116.77	83.73	95.346	90.593	41.431	50.641
	2410016O06Rik	2410016O06Rik|MAPJD|NO66|-|12|12 D1|protein-coding	NM_023633	5.69233	3.929	3.8086	6.944	1.04446	0.61429	0.409395	0.739274	0.331313	0.126	0.275	0.238923	0.105	0.188	0.471	0.0272	0.0644	0.090746	0.621	0.865	0.813	0.000261	0.00222	-0.712158	6.55e-05	0.00173212	5.844	6.036	5.197	3.638	3.139	3.55	5.389	3.124	3.545	4.185	3.876	4.313	4.642	7.952	8.72	7.007	7.079	6.264	5.45	6.396
	2410017I17Rik	2410017I17Rik|-|-|17|17 B1|ncRNA	NR_033517	0	0	0.013	0.004	#DIV/0!	#DIV/0!	#DIV/0!	0.2	NA	1	1	-0.296912	0.579	1	1.57	0.656	1	0.0614787	0.649	1	1.07	0.741	1	0.577997	0.829588	1	0	0	0	0	0	0	0	0.065	0	0	0	0	0.012	0	0.012	0	0	0	0	0
	2410018L13Rik	2410018L13Rik|2810480C08Rik|-|12|12 A1.3|ncRNA	NR_015504	0.135667	0.0555	0	0.021	0.203398	0.175633	0	0.388889	0.662865	0.214	0.394	2.02991	0.00724	0.0191	-2.64	0.0233	0.0569	-0.30944	0.144	1	-1.44	0.296	0.475	-1.60938	0.532759	1	0.122	0.123	0.162	0	0.051	0.093	0.078	0	0	0	0	0	0	0	0.026	0	0.076	0.024	0.667	0.316
	2410021H03Rik	2410021H03Rik|-|-|17|17 E1.3|ncRNA	NR_045428	0.018	0.024	0.0156	0.0393333	0.0458015	0.0391517	0.0334764	0.330532	-0.0695466	0.847	1	-0.111112	0.84	1	1.13	0.67	0.772	0.0142666	0.931	1	0.617	0.767	1	-0.389498	0.873643	1	0	0	0.054	0	0.024	0	0.072	0	0	0	0.078	0	0	0	0.146	0	0	0.09	0.393	0.613
	2410089E03Rik	2410089E03Rik|4732468D17Rik|Hug|Jbts17|b2b012Clo|-|15|15 A1|protein-coding	NM_001162906	1.68167	1.17925	0.9294	0.9455	0.343127	0.424191	0.561571	1.43912	0.301858	0.149	0.308	0.512866	0.0133	0.0326	-0.661	0.00262	0.00873	-0.189042	0.306	0.661	-0.349	0.0772	0.19	0.142744	0.469274	0.691422	2.101	1.43	1.514	1.107	1.399	1.215	0.996	0.675	1.023	1.102	0.726	1.121	0.922	0.523	0.989	1.201	0.963	1.075	4.901	2.78
	2410124H12Rik	2410124H12Rik|-|-|16|16 C4|protein-coding	NM_029740	0	0	0.0188	0	#DIV/0!	#DIV/0!	#DIV/0!	#DIV/0!	NA	1	1	-0.40916	0.448	1	NA	1	1	0.0972968	0.475	1	NA	1	1	2.12063	0.497528	1	0	0	0	0	0	0	0	0	0	0.094	0	0	0	0	0	0	0	0	0	0
	2410131K14Rik	2410131K14Rik|-|-|5|5 F|protein-coding	NM_001081236	8.68667	6.4255	5.1464	6.2535	0.71507	0.772667	0.921303	1.56259	0.236279	0.222	0.404	0.412262	0.0441	0.0909	-0.286	0.178	0.295	-0.161025	0.385	0.732	-0.0457	0.805	0.891	-0.12864	0.510113	0.719466	10.168	7.288	8.604	6.204	5.625	6.28	7.593	3.372	5.758	4.876	5.982	5.744	4.619	7.224	7.083	5.783	6.416	6.396	12.148	8.316
	2410137M14Rik	2410137M14Rik|-|-|17|17 B1|protein-coding	NM_029747	0	0	0.0138	0.0586667	0	0	0.050365	0.303972	NA	1	1	-0.384754	0.473	1	3.83	0.113	0.206	0.0844658	0.534	1	3.33	0.133	0.276	-1.16413	0.549627	1	0	0	0	0	0	0	0	0	0	0	0.069	0	0	0	0.107	0	0.166	0.079	0.297	0.232
	2410141K09Rik	2410141K09Rik|4930482J15Rik|Ayu21-35|Gt(pU21)35Imeg|-|13|13 B3|protein-coding	NM_183119	0	0	0	0	#DIV/0!	#DIV/0!	#DIV/0!	#DIV/0!	NA	1	1	NA	1	1	NA	1	1	NA	1	1	NA	1	1	NA	1	1	0	0	0	0	0	0	0	0	0	0	0	0	0	0	0	0	0	0	0	0
	2500002B13Rik	2500002B13Rik|-|-|8|8 B2|ncRNA	NR_126556	1.653	1.43125	1.2852	0.9935	3.81755	1.73065	4.284	1.14195	-0.0934511	0.769	0.87	-0.156003	0.628	0.738	-0.262	0.463	0.597	0.0482463	0.85	0.955	-0.368	0.244	0.415	0.431446	0.160044	0.384251	1.295	2.477	1.187	1.711	1.824	1.175	1.015	0.662	1.263	1.278	0.908	2.315	0.698	1.281	1.189	1.253	0.846	0.694	0.433	0.827
	2500004C02Rik	2500004C02Rik|-|-|2|2 H1|ncRNA	NR_040318	1.85933	2.13675	2.4262	2.69067	1.13443	1.05623	0.796782	0.996912	-0.369978	0.098	0.229	-0.689222	0.000744	0.00252	0.728	0.00672	0.0198	0.297094	0.075	0.326	0.337	0.141	0.288	-0.0179817	0.932169	0.971609	1.793	1.666	2.119	2.028	2.422	2.102	1.995	2.11	2.387	2.214	2.575	2.845	2.557	3.389	3.086	2.079	2.747	2.286	1.639	2.023
	2510002D24Rik	2510002D24Rik|2410043I01Rik|AA163535|AA409624|DXMgi27|-|16|16 A3|protein-coding	NM_001033164	4.504	3.843	3.6788	4.75033	0.562016	0.567232	0.660467	0.83943	0.0530884	0.83	0.906	-0.0359549	0.892	0.933	0.272	0.464	0.598	0.080391	0.736	0.916	0.321	0.346	0.525	-0.228081	0.488814	0.704632	4.171	4.186	5.155	3.149	3.056	3.955	5.212	2.307	4.687	2.713	4.513	4.174	2.914	7.608	7.22	3.59	3.721	3.449	8.014	6.775
	2510003B16Rik	2510003B16Rik|-|-|4|4 D1|ncRNA	NR_131048	3.08467	2.90225	2.4332	2.56233	1.51879	1.01941	0.803832	0.69047	-0.102144	0.747	0.857	-0.0329334	0.916	0.948	-0.084	0.774	0.852	-0.0704034	0.795	0.934	-0.202	0.494	0.661	0.126602	0.646139	0.815348	2.943	2.682	3.629	3.598	2.567	1.749	3.695	1.253	2.247	3.249	2.786	2.631	2.611	2.843	2.607	1.865	2.88	2.568	2.031	2.847
	2510009E07Rik	2510009E07Rik|AI194952|-|16|16 B1|protein-coding	NM_001001881	35.1273	23.9353	17.2992	10.981	0.769442	0.997718	0.778192	0.876237	0.341626	0.0809	0.2	0.688137	9.03e-07	5.39e-06	-1.48	8.5e-08	6.95e-07	-0.319233	0.0509	0.256	-1.13	1.91e-05	0.000242	0.794897	0.00041254	0.00671004	38.873	33.068	33.441	28.536	25.32	19.681	22.204	15.112	17.057	21.149	15.949	17.229	16.587	6.284	9.897	10.811	10.328	11.979	45.653	23.99
	2510039O18Rik	2510039O18Rik|Kiaa2013|-|4|4 E2|protein-coding	NM_029841	8.01567	6.453	5.956	7.069	0.78133	0.689423	0.643127	0.977461	0.120876	0.477	0.66	0.104854	0.458	0.59	-0.0137	0.926	0.953	0.0194346	0.895	0.969	0.108	0.464	0.636	-0.0868014	0.511385	0.720148	8.434	7.987	7.626	5.869	5.692	6.993	7.258	6.086	4.883	5.63	6.543	6.638	5.061	5.837	7.677	7.977	8.074	7.788	10.259	9.36
	2610001J05Rik	2610001J05Rik|C79299|-|6|6 A1|ncRNA	NR_024619	19.1403	16.5787	18.392	17.6687	0.718805	0.865144	1.3476	0.755717	0.0177604	0.935	0.967	-0.260035	0.245	0.372	0.0769	0.732	0.82	0.251908	0.262	0.619	0.0909	0.698	0.819	0.198072	0.386708	0.62721	19.075	20.49	17.856	15.09	11.88	17.498	21.847	24.507	19.05	11.158	16.988	20.257	11.783	21.753	19.327	17.592	16.31	19.247	26.628	19.163
	2610002M06Rik	2610002M06Rik|8430408J07Rik|AI876413|Chmp1b2|-|X|X D|protein-coding	NM_025921	6.49633	4.216	4.0284	3.86617	0.35941	0.273944	0.277457	0.312165	0.41367	0.0507	0.143	0.348694	0.0749	0.142	-0.576	0.0476	0.102	0.0738691	0.699	0.902	-0.146	0.595	0.742	0.22724	0.364874	0.60746	7.437	6.904	5.148	3.067	5.476	4.153	4.168	4.586	4.219	4.923	2.936	3.478	4.729	1.471	4.162	4.131	4.209	4.495	18.075	15.39
	2610005L07Rik	2610005L07Rik|2810038F24Rik|6720476A01Rik|-|8|8 A2|pseudo	NR_028428	0.00866667	0.0035	0.0014	0.00383333	0.163522	0.0486111	0.0482759	0.479167	0.165357	0.669	1	0.204927	0.721	1	-1.21	0.652	0.759	-0.00470746	0.975	1	-0.208	0.927	1	0.0805694	0.977309	1	0	0	0.026	0.005	0.009	0	0	0	0	0	0.007	0	0	0	0.005	0	0.018	0	0.053	0.072
	2610008E11Rik	2610008E11Rik|-|-|10|10 C1|protein-coding	NM_001004362	4.96467	4.0385	3.4416	3.08317	0.431073	0.505571	0.738224	0.969854	0.0928539	0.697	0.825	0.192955	0.332	0.468	-0.502	0.093	0.176	-0.0841937	0.69	0.899	-0.406	0.173	0.33	0.310782	0.230003	0.468995	5.804	4.853	4.237	3.786	5.652	3.828	2.888	3.514	3.608	4.451	2.384	3.251	4.213	1.379	2.615	3.89	3.127	3.275	11.517	7.988
	2610016A17Rik	2610016A17Rik|2610317C19Rik|-|19|19 C1|ncRNA	NR_045347	0	0	0	0	#DIV/0!	0	#DIV/0!	0	NA	1	1	NA	1	1	NA	1	1	NA	1	1	NA	1	1	NA	1	1	0	0	0	0	0	0	0	0	0	0	0	0	0	0	0	0	0	0	0	0.047
	2610020C07Rik	2610020C07Rik|-|-|16|16 A1|ncRNA	NR_038156	4.61767	3.738	3.1282	2.6335	1.0426	1.11349	1.08355	1.38096	0.108762	0.582	0.743	0.232552	0.201	0.319	-0.619	0.0535	0.112	-0.112111	0.508	0.81	-0.512	0.0782	0.191	0.395775	0.13741	0.352182	5.446	4.522	3.885	3.246	3.599	4.467	3.64	3.49	3.487	3.206	2.572	2.886	3.721	1.176	2.006	3.362	2.667	2.869	4.429	3.357
	2610020H08Rik	2610020H08Rik|-|-|7|7 F2|protein-coding	NM_028129	0.415	0.442	0.4958	0.332	0.588652	1.98206	1.86391	2.08805	-0.269825	0.533	0.704	-0.518391	0.153	0.256	-0.116	0.775	0.853	0.155895	0.619	0.863	-0.461	0.299	0.477	0.67227	0.0299756	0.134368	0.623	0.27	0.352	0.887	0.333	0.261	0.287	0.588	0.508	0.461	0.374	0.548	0.414	0.323	0.269	0.371	0.358	0.257	0.705	0.223
	2610027K06Rik	2610027K06Rik|-|-|11|11 C|ncRNA	NR_077059	0.663333	0.75375	0.682	1.42133	0.840727	0.717174	0.655139	1.12625	-0.357511	0.165	0.331	-0.353751	0.263	0.394	1.27	4.47e-09	4.42e-08	-0.00576151	0.981	0.993	0.886	2.94e-06	4.71e-05	-0.891902	0.000211887	0.00406041	0.773	0.667	0.55	0.711	0.812	0.765	0.727	0.547	0.482	0.932	0.449	1	1.097	1.156	1.431	1.778	1.522	1.544	0.789	1.051
	2610028E06Rik	2610028E06Rik|BB043107|-|4|4 D2.2|ncRNA	NR_015560	0.00566667	0.01075	0.013	0.00466667	0.0674603	0.244318	0.309524	0.155556	-0.231157	0.604	1	-0.602452	0.421	0.554	-0.199	0.935	1	0.0621194	0.807	1	-1.28	0.522	1	1.69994	0.321479	1	0.005	0	0.012	0	0.02	0	0.023	0	0	0.009	0.017	0.039	0	0	0	0.009	0	0.019	0.084	0.044
	2610028H24Rik	2610028H24Rik|ORF67|-|10|10 C1|protein-coding	NM_029816	0.555333	0.4455	0.2374	0.266833	1.20463	1.53093	0.565238	0.585161	0.0931047	0.776	0.873	0.754667	0.0639	0.124	-0.893	0.103	0.191	-0.523525	0.0836	0.347	-0.786	0.111	0.244	0.0467019	0.929491	0.970623	0.512	0.625	0.529	0.509	0.44	0.321	0.512	0.167	0.273	0.365	0.187	0.195	0.053	0.474	0.19	0.246	0.346	0.292	0.461	0.291
	2610035D17Rik	2610035D17Rik|-|-|11|11 E2|ncRNA	NR_015556	4.8	5.633	9.3996	11.6963	1.11862	0.941344	1.29972	1.27189	-0.385398	0.102	0.236	-1.25534	2.55e-08	1.88e-07	1.49	7.06e-09	6.8e-08	0.775853	0.000519	0.0101	1.08	2.53e-05	0.000309	-0.194054	0.413939	0.649673	4.647	4.683	5.07	4.136	5.017	5.237	8.142	12.695	7.734	6.363	10.473	9.733	10.613	15.589	13.264	10.985	10.44	9.287	4.291	5.984
	2610035F20Rik	2610035F20Rik|-|-|14|14 E5|ncRNA	NR_045046	0.391667	0.338	0.3664	0.368667	1.16915	1.24723	1.77864	2.14341	-0.000476543	0.999	1	-0.280778	0.552	0.674	0.119	0.795	0.866	0.203059	0.54	0.827	0.112	0.805	0.891	0.207115	0.643616	0.813816	0.417	0.47	0.288	0.272	0.549	0.341	0.19	0.085	0.512	0.33	0.547	0.358	0.442	0.198	0.565	0.215	0.374	0.418	0.335	0.271
	2610037D02Rik	2610037D02Rik|AU024679|-|15|15 F1|ncRNA	NR_040423	0.00366667	0.002	0	0.00316667	0.15942	0.166667	0	#DIV/0!	0.0390342	0.889	1	0.0372416	0.945	1	-0.0685	0.982	1	0.00913838	0.946	1	0.431	0.882	1	-0.199571	0.949398	1	0.011	0	0	0	0	0	0.008	0	0	0	0	0	0	0	0	0	0.01	0.009	0.023	0.012
	2610042L04Rik	2610042L04Rik|Tksn|takusan|-|14|14 A1|protein-coding	NM_001309398	0.186333	0.0155	0	0.0243333	0.22835	0.164894	0	0.760417	1.75396	0.00104	0.00693	2.71716	0.000296	0.0011	-2.61	0.016	0.0412	-0.0903209	0.573	1	0.889	0.54	0.7	-2.41839	0.227995	1	0.326	0.057	0.176	0	0.01	0.023	0.029	0	0	0	0	0	0.08	0	0.01	0	0.038	0.018	0.816	0.094
	2610044O15Rik8	2610044O15Rik8|2610044O15Rik|-|8 E2|8|protein-coding	NM_153780	2.578	2.35825	2.0582	2.065	0.7598	0.640133	0.618078	0.746835	-0.0577985	0.798	0.886	-0.0103644	0.965	0.979	-0.123	0.622	0.738	-0.0441328	0.84	0.952	-0.189	0.43	0.606	0.140579	0.564621	0.758397	2.526	2.564	2.644	2.447	2.201	2.816	1.969	1.434	2.859	2.187	1.649	2.162	2.804	1.56	1.982	1.881	2.137	2.026	3.393	3.684
	2610203C22Rik	2610203C22Rik|2310007M24Rik|-|1|1 A2|ncRNA	NR_015470	2.914	3.97675	3.242	3.04667	3.8596	3.76943	2.78522	2.94364	-0.606288	0.0162	0.0604	-0.462172	0.0216	0.0493	0.265	0.301	0.436	-0.153713	0.46	0.78	-0.384	0.137	0.282	0.210466	0.328063	0.575085	2.787	2.981	2.974	4.275	4.412	4.542	2.678	3.542	2.405	3.676	2.953	3.634	3.91	2.835	3.304	3.304	2.56	2.367	0.755	1.055
	2610206C17Rik	2610206C17Rik|-|-|7|7 D3|ncRNA	NR_038175	0.0903333	0.06125	0.0908	0.0533333	1.20444	4.71154	1.74615	2.96296	0.172411	0.748	0.858	-0.246135	0.726	0.817	-0.441	0.722	0.813	0.311036	0.362	0.713	-0.0778	0.936	0.965	0.775532	0.399786	0.637866	0.033	0.226	0.012	0.079	0.042	0.076	0.048	0.057	0.031	0.067	0.139	0.16	0.175	0	0.086	0.018	0.021	0.02	0.075	0.013
	2610301B20Rik	2610301B20Rik|AI428449|-|4|4 A1|protein-coding	NM_026005	13.098	15.688	12.9762	10.626	1.24376	1.21396	0.829893	0.694737	-0.437266	0.00804	0.0351	-0.303547	0.0213	0.0486	-0.129	0.447	0.583	-0.133369	0.296	0.652	-0.579	0.000216	0.0019	0.441888	0.0014522	0.0167409	12.743	13.456	13.095	13.858	15.924	17.699	15.271	13.552	13.425	13.078	11.105	13.721	10.806	7.111	10.234	11.649	11.986	11.97	10.531	12.923
	2610306M01Rik	2610306M01Rik|-|-|6|6 D1|ncRNA	NR_028298	7.843	6.142	7.3602	8.65833	1.573	0.902837	1.18407	0.984237	0.16247	0.532	0.704	-0.221195	0.391	0.526	0.368	0.302	0.438	0.343481	0.159	0.49	0.535	0.114	0.25	-0.12811	0.681528	0.835485	6.599	8.593	8.337	5.62	4.533	5.326	9.089	8.03	6.34	4.635	10.261	7.535	7.539	14.964	9.326	6.828	6.354	6.939	4.986	6.803
	2610307P16Rik	2610307P16Rik|AI666457|-|13|13 A3.1|ncRNA	NR_045053	0.073	0.033	0.0116	0.0146667	0.178049	0.75	0.966667	1.22222	0.535014	0.307	0.497	1.28945	0.0763	0.144	-2.2	0.0471	0.101	-0.300726	0.321	1	-1.31	0.229	0.398	0.0978164	0.94512	1	0.1	0.069	0.05	0.039	0.043	0.017	0.033	0	0.021	0.013	0.024	0	0	0.045	0.015	0	0.014	0.014	0.41	0.044
	2610316D01Rik	2610316D01Rik|-|-|3|3 B|ncRNA	NR_045172	1.63433	1.5765	1.6942	1.54017	0.515563	0.746449	0.656412	0.535338	-0.0930685	0.771	0.871	-0.326454	0.325	0.461	0.0544	0.875	0.92	0.198089	0.458	0.779	-0.0515	0.87	0.929	0.295944	0.338643	0.584138	1.485	1.342	2.076	1.042	1.356	1.851	2.057	1.924	1.341	1.077	2.185	1.944	0.738	1.325	2.446	1.552	1.797	1.383	3.17	2.112
	2610318N02Rik	2610318N02Rik|AL033325|-|16|16 A3|protein-coding	NM_183287	0.169	0.06575	0.0502	0.0331667	0.498525	0.248113	0.356028	0.0745318	0.513829	0.337	0.529	0.824554	0.266	0.397	-2.13	0.141	0.245	-0.0410026	0.864	0.959	-0.955	0.607	0.751	0.654246	0.730212	1	0.152	0.24	0.115	0.155	0	0	0.108	0	0	0	0.142	0.109	0	0.15	0	0.049	0	0	0.339	0.265
	2610507B11Rik	2610507B11Rik|AU022687|D11Bhm178e|D11Bhm179e|E1|Kiaa0100|mKIAA0100|-|11 B5|11 46.74 cM|protein-coding	NM_001002004	35.8847	42.3425	36.8892	34.426	1.63775	1.25649	1.11965	1.19905	-0.424458	0.0165	0.0613	-0.360343	0.00983	0.025	0.111	0.62	0.736	-0.0678127	0.658	0.884	-0.329	0.128	0.268	0.258591	0.165122	0.391143	36.032	36.758	34.864	47.893	41.067	43.044	37.366	38.803	35.859	43.711	30.124	35.949	37.626	19.03	30.516	44.248	37.772	37.364	21.911	33.699
	2610507I01Rik	2610507I01Rik|5033414D05Rik|-|11|11 B1.3|ncRNA	NR_037964	6.06033	5.69675	5.895	6.03217	1.40059	1.70256	1.42357	1.45318	-0.106232	0.584	0.744	-0.284442	0.0372	0.0786	0.193	0.359	0.496	0.166949	0.291	0.649	0.0779	0.705	0.823	0.0996875	0.555277	0.752346	5.935	6.495	5.751	6.664	5.656	4.718	5.749	4.977	5.835	5.887	5.858	6.918	6.915	6.121	7.059	5.403	4.991	5.704	4.327	3.346
	2610524H06Rik	2610524H06Rik|-|-|5|5 F|protein-coding	NM_181075	14.6893	8.327	5.9456	4.80133	1.09336	0.575665	0.575566	0.473598	0.609888	0.00374	0.0194	0.969581	3.38e-08	2.44e-07	-1.39	3.77e-05	0.000199	-0.319898	0.0783	0.334	-0.763	0.0142	0.054	0.422573	0.129701	0.340404	13.434	15.395	15.239	7.799	6.958	7.735	10.816	6.534	6.168	5.767	6.107	5.152	4.615	7.792	5.511	3.503	3.905	3.482	13.435	14.465
	2610528A11Rik	2610528A11Rik|AW494830|-|14|14 B|protein-coding	NM_001206684	0.071	0.0985	0.131	0.170667	0.628319	0.278249	0.334184	0.273943	-0.221031	0.674	0.81	-0.609888	0.417	0.552	1.4	0.246	0.377	0.155951	0.614	0.86	0.82	0.393	0.571	-0.261666	0.795693	0.900928	0.076	0	0.137	0.026	0.072	0.115	0.181	0	0.071	0.022	0.198	0.364	0	0.352	0.123	0.082	0.285	0.182	0.113	0.354
	2610528J11Rik	2610528J11Rik|TEMP|-|4|4 D2.1|protein-coding	NM_025572	0.007	0.00975	0	0.03	#DIV/0!	0.40625	#DIV/0!	0.201342	-0.0707456	0.8	1	-0.0715375	0.894	1	1.98	0.478	1	-0.01273	0.925	1	1.17	0.644	1	-1.4938	0.630083	1	0.021	0	0	0	0.039	0	0	0	0	0	0	0	0	0	0	0.102	0.078	0	0	0.024
	2700038G22Rik	2700038G22Rik|-|-|5|5 A3|ncRNA	NR_045042	0.188667	0.126	0.1064	0.118333	0.186614	0.45	1.22299	1.31481	0.285443	0.578	0.74	0.372732	0.578	0.696	-0.476	0.52	0.65	-0.0278225	0.932	0.979	-0.0403	0.958	0.978	-0.0358015	0.966103	0.986947	0.142	0.271	0.153	0.072	0.04	0.129	0.263	0	0	0.073	0.155	0.304	0.056	0.253	0.206	0.091	0.053	0.051	1.011	0.28
	2700046A07Rik	2700046A07Rik|A330042I05Rik|-|18|18 E1|ncRNA	NR_037693	0.746	0.637	0.2372	0.126167	3.73	3.0625	2.85783	0.934568	0.0377275	0.898	0.947	1.33067	0.000371	0.00135	-2.4	3.81e-06	2.4e-05	-1.10022	7.48e-05	0.00225	-2.37	8.78e-08	2.01e-06	1.02211	0.0431456	0.170909	0.995	0.605	0.638	0.547	0.573	0.61	0.818	0.321	0.225	0.169	0.182	0.289	0.07	0.142	0.095	0.304	0.05	0.096	0.2	0.208
	2700046G09Rik	2700046G09Rik|-|-|19|19 C1|ncRNA	NR_033198	1.06233	1.2245	1.5604	1.43967	1.51545	0.767231	0.868336	1.26065	-0.349134	0.256	0.444	-0.810999	0.0183	0.0428	0.648	0.227	0.354	0.379652	0.166	0.5	0.253	0.597	0.743	0.232678	0.608393	0.790135	0.769	1.324	1.094	1.185	0.821	1.348	1.544	2.263	1.202	0.85	2.071	1.416	0.308	2.929	1.531	1.616	1.088	1.166	0.701	1.596
	2700049A03Rik	2700049A03Rik|Ta3|Talpid3|mKIAA0586|-|12|12 C2-C3|protein-coding	NM_029818	1.07167	0.7105	0.532	0.5445	0.643257	0.742424	0.700922	1.1135	0.390835	0.0524	0.147	0.701991	0.000689	0.00235	-0.862	3.19e-06	2.03e-05	-0.281147	0.138	0.459	-0.459	0.00837	0.0363	0.151909	0.413132	0.648977	1.219	0.971	1.025	0.653	0.676	0.816	0.697	0.464	0.487	0.459	0.501	0.749	0.486	0.408	0.55	0.62	0.541	0.662	1.666	0.957
	2700054A10Rik	2700054A10Rik|-|-|17 A1|17|ncRNA	NR_045437	0.89	0.31975	0.3724	0.684667	0.589795	0.329639	0.418427	0.66408	1.23628	4.4e-06	7.42e-05	0.942211	3.61e-05	0.00016	-0.205	0.515	0.646	0.309557	0.203	0.553	1.12	0.000538	0.00402	-0.749514	0.00821416	0.0565953	0.968	0.849	0.853	0.272	0.256	0.278	0.473	0.325	0.342	0.343	0.397	0.455	0.539	1.043	0.812	0.615	0.628	0.471	1.509	0.97
	2700060E02Rik	2700060E02Rik|-|-|14|14 A3|protein-coding	NM_026528	17.0687	13.7132	11.2392	11.9228	0.951696	0.95264	0.911311	0.583337	0.117027	0.573	0.737	0.284376	0.088	0.163	-0.332	0.0596	0.123	-0.150179	0.41	0.749	-0.215	0.254	0.426	0.0524079	0.737552	0.868249	16.41	17.008	17.788	16.128	10.955	12.766	15.004	14.314	10.614	10.428	10.461	10.379	10.234	12.85	12.488	12.116	11.129	12.72	17.935	14.395
	2700062C07Rik	2700062C07Rik|AI195775|C87515|-|18|18 A2|protein-coding	NM_026529	4.85767	3.454	3.3196	4.59367	0.639167	0.525323	0.667659	0.669338	0.290872	0.183	0.355	0.23757	0.272	0.404	0.0909	0.739	0.825	0.0602163	0.772	0.927	0.391	0.13	0.271	-0.318033	0.198856	0.435409	5.291	4.739	4.543	3.031	3.185	3.086	4.514	4.094	3.013	2.575	3.718	3.198	2.612	5.052	7.004	3.636	4.663	4.595	7.6	6.575
	2700069I18Rik	2700069I18Rik|-|-|3|3 A1|ncRNA	NR_045905	0.121667	0.11475	0.0586	0.0603333	0.317668	1.00658	0.771053	0.310997	-0.0430368	0.936	0.968	0.575013	0.437	0.569	-0.76	0.494	0.627	-0.26213	0.388	0.733	-0.845	0.421	0.598	-0.182353	0.881642	1	0.123	0.11	0.132	0.05	0.207	0.167	0.035	0.125	0	0.042	0.038	0.088	0.12	0	0.071	0.04	0	0.131	0.383	0.114
	2700070H01Rik	2700070H01Rik|-|-|14|14 D1|ncRNA	NR_046019	0.0586667	0.01425	0.0996	0.115	#DIV/0!	0.57	1.95294	1.47436	0.510092	0.284	0.474	-0.62572	0.393	0.528	1.09	0.267	0.401	0.74142	0.018	0.135	3.03	0.00255	0.0144	-0.0660919	0.9209	0.966551	0.022	0	0.154	0	0.01	0	0.047	0.168	0	0.132	0.12	0.078	0.107	0.065	0.222	0.177	0.041	0.078	0	0.025
	2700081O15Rik	2700081O15Rik|AI255177|AI848741|AW742297|-|19|19 A|protein-coding	NM_175381	17.0137	6.53425	5.1706	5.97733	0.41736	0.550624	0.662473	1.12674	1.13495	1.66e-06	3.21e-05	1.38093	2.04e-19	4.92e-18	-1.35	3.62e-11	4.68e-10	-0.179235	0.339	0.693	-0.152	0.493	0.661	-0.0431218	0.787353	0.895975	20.909	15	15.132	4.174	6.046	7.079	8.838	5.054	4.948	4.887	4.536	6.428	3.964	4.286	7.287	6.133	8.055	6.139	40.765	11.867
	2700089I24Rik	2700089I24Rik|-|-|19|19 D3|ncRNA	NR_045308	0	0	0	0	#DIV/0!	#DIV/0!	#DIV/0!	#DIV/0!	NA	1	1	NA	1	1	NA	1	1	NA	1	1	NA	1	1	NA	1	1	0	0	0	0	0	0	0	0	0	0	0	0	0	0	0	0	0	0	0	0
	2700097O09Rik	2700097O09Rik|AW552125|-|12|12 C1|protein-coding	NM_028314	2.95167	2.58175	3.2322	3.57317	0.79926	1.3858	1.29185	1.37166	-0.00721866	0.977	0.989	-0.428406	0.0613	0.12	0.51	0.102	0.191	0.392634	0.0552	0.269	0.493	0.0816	0.197	-0.0528296	0.836059	0.922512	2.703	3.631	2.521	2.465	2.163	3.363	2.336	4.011	3.501	2.89	2.828	2.931	3.026	5.143	3.354	3.179	2.997	3.74	3.693	1.863
	2700099C18Rik	2700099C18Rik|9430041D22Rik|-|17|17 E5|pseudo	NR_024720	0.974	0.4635	0.3494	0.142833	0.657664	0.311074	0.416945	0.299441	0.788169	0.0297	0.0957	1.11819	0.0098	0.0249	-2.62	1.01e-08	9.47e-08	-0.20118	0.544	0.829	-1.72	0.00049	0.00372	1.40753	0.0113329	0.0708605	1.087	1.053	0.782	0.261	0.383	0.479	0.731	0.617	0.042	0.35	0.306	0.432	0.074	0.06	0.175	0.243	0.197	0.108	1.481	1.49
	2810001G20Rik	2810001G20Rik|AW045514|-|11|11 B3|ncRNA	NR_033780	11.347	7.3985	8.0922	9.2995	1.11464	0.806552	0.848684	0.945167	0.404335	0.116	0.259	0.188469	0.377	0.513	-0.0537	0.898	0.935	0.216913	0.325	0.681	0.374	0.341	0.52	-0.118188	0.728923	0.864103	10.238	10.854	12.949	7.883	7.663	4.482	9.566	8.685	6.87	6.11	7.783	11.013	6.913	18.624	10.47	7.641	6.15	5.999	10.18	9.173
	2810002D19Rik	2810002D19Rik|-|-|2|2 E1|ncRNA	NR_027831	3.32433	1.89125	2.2658	1.9165	0.717844	0.819788	0.981291	0.882366	0.57191	0.0334	0.105	0.222875	0.272	0.404	-0.605	0.0119	0.0323	0.340987	0.116	0.416	0.0033	0.99	0.995	0.384408	0.0535568	0.19614	3.045	3.253	3.675	2.204	2.024	1.112	2.225	2.044	2.338	2.16	2.434	2.353	2.024	2.017	2.357	1.623	1.518	1.96	4.631	2.307
	2810004N23Rik	2810004N23Rik|3110004G14Rik|Ayu21-55|Gt(pU21)55Imeg|GtAyu21-55|-|8|8 E2|protein-coding	NM_025615	10.4143	9.7335	9.2188	9.60417	1.17041	1.39869	1.40874	1.49064	-0.0942252	0.611	0.765	-0.147088	0.29	0.424	0.0723	0.699	0.795	0.0488917	0.735	0.916	-0.0295	0.868	0.927	0.0808223	0.579722	0.768996	9.861	11.193	10.189	10.69	8.649	9.466	10.129	9.098	7.989	9.875	9.086	10.046	11.249	7.873	10.431	10.297	8.677	9.098	8.898	6.959
	2810006K23Rik	2810006K23Rik|-|-|5|5 F|protein-coding	NM_001134717	9.005	8.1495	6.6324	6.7305	1.62399	1.49972	1.6825	1.42626	-0.0456301	0.813	0.895	0.119406	0.402	0.536	-0.229	0.249	0.38	-0.157963	0.284	0.641	-0.282	0.13	0.271	0.116017	0.444894	0.67346	9.101	8.399	9.515	8.771	6.978	8.696	8.153	6.529	6.147	6.649	6.681	7.156	6.805	7.116	7.977	6.091	5.766	6.628	5.545	5.434
	2810013P06Rik	2810013P06Rik|-|-|8|8 E1|ncRNA	NR_045268	4.85067	5.047	10.453	10.9143	0.693646	0.936016	1.37793	1.2505	-0.23192	0.226	0.409	-1.39985	6.17e-14	8.83e-13	1.37	1.27e-10	1.52e-09	1.10425	1.62e-10	2.92e-08	1.12	3.17e-09	9.92e-08	0.0665006	0.71622	0.856437	5.05	4.369	5.133	4.444	4.549	5.301	5.894	12.566	10.166	7.805	10.106	11.622	11.757	11.299	11.345	12.37	9.538	9.177	6.993	5.392
	2810021J22Rik	2810021J22Rik|AI449137|-|11|11 B1.3|protein-coding	NM_172403	1.13767	1.02775	0.9948	1.0425	0.425296	0.560693	0.80878	1.04459	-0.0496666	0.836	0.91	-0.144186	0.505	0.632	0.0582	0.794	0.865	0.0868292	0.674	0.89	0.00283	0.99	0.995	0.0936817	0.642353	0.812932	1.364	0.999	1.05	0.958	1.373	0.967	0.813	0.819	1.068	1.279	0.774	1.034	1.15	0.72	1.152	1.33	1.044	0.859	2.675	1.833
	2810025M15Rik	2810025M15Rik|AI429618|-|1|1 H1|ncRNA	NR_027984	12.8677	7.8195	7.536	8.9535	1.26775	0.841893	0.931751	0.773721	0.505127	0.0628	0.167	0.447042	0.0537	0.107	-0.3	0.431	0.567	0.0739216	0.765	0.925	0.235	0.531	0.693	-0.144376	0.659546	0.823418	11.688	13.733	13.182	6.113	5.106	7.857	12.202	8.522	5.767	5.052	9.625	8.714	5.25	16.692	10.181	6.595	7.667	7.336	10.15	9.288
	2810029C07Rik	2810029C07Rik|AU017849|-|12|12 F1|ncRNA	NR_045295	3.19233	2.65325	2.2298	2.51217	0.88186	0.681194	0.570573	0.557269	0.0726248	0.747	0.857	0.214991	0.303	0.438	-0.168	0.59	0.711	-0.125768	0.522	0.818	-0.0924	0.747	0.852	-0.0402432	0.878821	0.944912	3.219	2.885	3.473	2.506	3.143	1.953	3.011	2.15	1.746	2.133	1.937	3.183	2.398	2.556	4.463	2.178	1.572	1.906	3.62	3.895
	2810032G03Rik	2810032G03Rik|AI461720|-|12|12 A1.1|ncRNA	NR_015579	1.77933	1.2415	0.8106	1.668	0.452641	0.284748	0.210764	0.335209	0.293464	0.352	0.545	0.783111	0.00982	0.025	0.0817	0.778	0.855	-0.382794	0.173	0.51	0.407	0.197	0.36	-0.894233	0.00223073	0.0228621	1.642	2.088	1.608	0.881	1.628	0.724	1.733	0.622	0.551	0.705	0.925	1.25	0.984	1.986	2.189	1.324	1.704	1.821	3.931	4.36
	2810047C21Rik1	2810047C21Rik1|100042870|2810047C21Rik|AA683836|Gm4082|-|7|7 A1|ncRNA	NR_015598	0	0	0	0	#DIV/0!	0	#DIV/0!	#DIV/0!	NA	1	1	NA	1	1	NA	1	1	NA	1	1	NA	1	1	NA	1	1	0	0	0	0	0	0	0	0	0	0	0	0	0	0	0	0	0	0	0	0.014
	2810049E08Rik	2810049E08Rik|-|-|13|13 C3|ncRNA	NR_036594	0.869	1.21725	1.3886	1.12	0.299139	0.399622	1.05758	0.807498	-0.617698	0.0505	0.143	-0.936551	0.00286	0.00843	0.56	0.126	0.224	0.251506	0.325	0.681	-0.126	0.699	0.82	0.434379	0.159733	0.383924	0.782	1.056	0.769	0.972	1.42	0.867	1.61	1.243	1.26	0.97	1.544	1.926	0.801	1.582	1.377	1.345	0.714	0.901	2.905	3.046
	2810403A07Rik	2810403A07Rik|A430106P18Rik|AI256352|AI451678|Blom7|Kiaa0907|-|3|3 F1|protein-coding	NM_028814	8.81267	7.581	6.5742	8.1055	0.537489	0.677783	0.659134	1.2653	0.0305088	0.855	0.92	0.102222	0.574	0.693	0.0228	0.927	0.954	-0.0647569	0.684	0.896	0.0525	0.812	0.895	-0.123588	0.569413	0.762158	7.97	9.641	8.827	6.704	7.866	7.698	8.056	4.678	6.462	6.48	6.438	8.813	5.661	4.004	8.625	9.335	10.081	10.927	16.396	11.185
	2810403D21Rik	2810403D21Rik|1810022M18Rik|4632410B05Rik|AU017716|-|X|X D|ncRNA	NR_015493	0.615667	0.67625	0.5196	0.567667	1.44523	1.52652	0.839418	1.21296	-0.285683	0.474	0.656	-0.00816465	0.986	0.991	0.167	0.808	0.875	-0.26396	0.378	0.726	-0.18	0.753	0.857	-0.119953	0.832304	0.92022	0.344	0.967	0.536	0.777	0.592	0.52	0.816	0.878	0.426	0.459	0.357	0.478	0.899	1.247	0.535	0.308	0.178	0.239	0.426	0.443
	2810404M03Rik	2810404M03Rik|-|-|8|8 A4|ncRNA	NR_045497	0	0.00725	0.035	0.0238333	0	0.100694	1.45833	0.993056	-0.142496	0.61	1	-1.2456	0.0839	0.156	3.06	0.268	1	0.283554	0.233	1	1.29	0.555	1	0.798964	0.569438	1	0	0	0	0	0.029	0	0	0	0.043	0.053	0.024	0.055	0	0	0.089	0.025	0.029	0	0.034	0.072
	2810405F15Rik	2810405F15Rik|-|-|2|2 E5|ncRNA	NR_033447	0.105667	0.09275	0.0882	0.115	0.384242	0.718992	0.773684	1.69118	0.0568656	0.913	0.956	-0.103515	0.882	0.926	0.239	0.743	0.828	0.0986942	0.767	0.926	0.336	0.602	0.747	-0.0520384	0.943741	0.977608	0.062	0.069	0.186	0.05	0.058	0.14	0.123	0	0	0.117	0.192	0.132	0.036	0.171	0.095	0.119	0.115	0.154	0.275	0.129
	2810408A11Rik	2810408A11Rik|1700019L01Rik|4930470J18Rik|-|11|11 B3|protein-coding	NM_001316697	1.01467	0.5245	0.3906	0.375667	0.901926	3.97348	2.00308	2.88974	0.679864	0.0261	0.087	0.965997	0.00679	0.0181	-1.18	0.000153	0.000704	-0.214948	0.452	0.777	-0.44	0.14	0.286	0.159505	0.638112	0.810309	1.035	0.838	1.171	0.642	0.569	0.401	0.486	0.258	0.493	0.509	0.197	0.496	0.309	0.375	0.39	0.489	0.33	0.361	1.125	0.132
	2810408I11Rik	2810408I11Rik|-|-|1|1 C2|ncRNA	NR_038009	0.57	0.19775	0.2718	0.202167	2.38494	0.352496	0.596053	0.366244	0.848793	0.108	0.245	0.763657	0.236	0.363	-1.35	0.141	0.246	0.149609	0.639	0.875	0.0805	0.94	0.967	0.420471	0.654936	0.820393	0.51	0.302	0.898	0	0.126	0.244	0.421	0.686	0.075	0.046	0.168	0.384	0	0.425	0.363	0.087	0.05	0.288	0.239	0.561
	2810410L24Rik	2810410L24Rik|-|-|11|11 E2|ncRNA	NR_030682	1.17367	1.17925	0.8476	0.992333	0.939685	1.22456	1.4415	2.94461	-0.176048	0.539	0.709	0.167205	0.549	0.671	-0.0692	0.774	0.852	-0.29996	0.24	0.594	-0.261	0.313	0.491	-0.101471	0.676028	0.833126	1.177	1.123	1.221	1.06	0.969	0.915	1.773	0.745	0.625	0.712	0.874	1.282	0.813	1.087	1.018	0.904	1.13	1.002	1.249	0.963
	2810428I15Rik	2810428I15Rik|-|-|8 B3.3|8|protein-coding	NM_025577	40.263	32.1658	38.2386	56.8507	1.28353	1.05496	1.09016	0.991916	0.138463	0.649	0.793	-0.230027	0.381	0.517	0.741	0.101	0.188	0.31633	0.237	0.591	0.885	0.0444	0.127	-0.492602	0.196916	0.432951	34.402	38.555	47.832	28.137	17.359	29.994	53.173	32.281	33.176	22.727	52.586	50.423	31.076	126.116	50.454	36.631	49.83	46.997	31.369	30.49
	2810429I04Rik	2810429I04Rik|AI256682|-|13|13 A1|ncRNA	NR_015522	0.376333	0.19725	0.1918	0.236667	0.732166	0.736007	0.290606	0.700197	0.394309	0.459	0.645	0.497316	0.479	0.608	-0.57	0.574	0.697	-0.000737472	0.998	0.999	0.127	0.907	0.948	-0.129401	0.90501	0.959116	0.658	0.222	0.249	0.335	0.155	0.299	0	0.337	0	0.028	0.359	0.235	0	0	0.286	0.478	0.185	0.471	0.514	0.268
	2810433D01Rik	2810433D01Rik|-|-|11|11 E1|ncRNA	NR_033474	0.005	0.039	0.0568	0.0368333	0.15625	0.46988	0.320904	0.270833	-0.466277	0.277	1	-1.61714	0.0324	0.0699	2.94	0.0908	0.173	0.191686	0.511	0.812	-0.0813	0.947	0.971	0.928952	0.333872	1	0	0	0.015	0	0.054	0	0.102	0	0.08	0.086	0.067	0.051	0.042	0.028	0.028	0.046	0	0.077	0.032	0.083
	2810442N19Rik	2810442N19Rik|-|-|1|1 H2.1|ncRNA	NR_040562	0.097	0.22975	0.174	0.102333	0.208602	1.89876	2.71875	6.39583	-0.641456	0.231	0.414	-0.637703	0.39	0.525	0.235	0.864	0.912	-0.154363	0.649	0.879	-1.24	0.164	0.318	0.888667	0.334626	0.580592	0.021	0	0.27	0.382	0.353	0.095	0.089	0.32	0.233	0.089	0.228	0	0.061	0.248	0.02	0.168	0.117	0	0.465	0.121
	2810454H06Rik	2810454H06Rik|-|-|6|6 G1|ncRNA	NR_029441	0.187333	0.13025	0.1746	0.186833	0.691267	0.692819	0.928723	2.49111	0.221771	0.62	0.772	-0.207867	0.673	0.775	0.255	0.669	0.772	0.32558	0.33	0.685	0.542	0.331	0.511	-0.0101819	0.984972	0.994877	0.277	0.183	0.102	0.103	0.235	0.077	0.106	0.311	0.075	0.203	0.211	0.073	0.252	0.308	0.196	0.229	0.076	0.06	0.271	0.188
	2810459M11Rik	2810459M11Rik|-|-|1|1 C5|protein-coding	NM_001144993	24.285	18.6745	19.7636	19.7892	5.52685	3.85598	4.15202	4.00753	0.178817	0.431	0.62	-0.0243735	0.882	0.926	-0.0882	0.724	0.814	0.193801	0.311	0.667	0.0937	0.709	0.826	0.120307	0.550146	0.74897	23.061	23.492	26.302	21.776	13.14	17.784	21.998	19.207	17.017	18.344	24.318	19.932	22.794	23.134	19.094	19.79	19.204	14.719	4.394	4.843
	2810468N07Rik	2810468N07Rik|-|-|17|17 A3.3|ncRNA	NR_045176	13.0797	16.0177	22.6246	22.7703	4.09764	1.87167	1.90187	1.69183	-0.437563	0.0748	0.189	-1.07112	1.43e-05	6.91e-05	1.01	0.000713	0.00277	0.55392	0.0187	0.139	0.54	0.06	0.158	0.102822	0.703156	0.848454	11.37	13.323	14.546	11.344	14.49	14.538	23.699	26.228	16.286	14.034	27.63	28.945	16.608	34.624	22.182	21.404	19.252	22.552	3.192	8.558
	2810471M01Rik	2810471M01Rik|-|-|11|11 A3.3|ncRNA	NR_045906	0.013	0	0	0	#DIV/0!	#DIV/0!	#DIV/0!	#DIV/0!	0.165074	0.556	1	0.147329	0.786	1	-1.78	0.604	1	NA	1	1	NA	1	1	NA	1	1	0.012	0.027	0	0	0	0	0	0	0	0	0	0	0	0	0	0	0	0	0	0
	2810474O19Rik	2810474O19Rik|6720435I21Rik|AA536804|AU020969|GET|Kiaa1551|-|6|6 G3|protein-coding	NM_001289662	0.731	0.74025	0.5906	0.572	0.348926	0.406061	0.481729	0.88958	-0.195972	0.499	0.678	-0.0179878	0.941	0.965	-0.182	0.667	0.77	-0.167665	0.458	0.779	-0.394	0.315	0.494	0.201633	0.552693	0.750599	0.962	0.547	0.684	0.654	1.117	0.651	0.539	0.645	0.528	0.739	0.477	0.564	0.875	0.125	0.664	0.621	0.595	0.552	2.095	1.823
	2900005J15Rik	2900005J15Rik|-|-|5|5 A3|ncRNA	NR_027851	0.187667	0.15	0.0684	0.111667	1.7873	0.765306	0.36383	0.395981	0.124233	0.797	0.886	0.931788	0.154	0.258	-0.593	0.329	0.466	-0.484692	0.157	0.486	-0.413	0.423	0.6	-0.684973	0.308232	0.556743	0.113	0.349	0.101	0.067	0.124	0.235	0.174	0.096	0	0.024	0.088	0.134	0.046	0.112	0.118	0.136	0.14	0.118	0.105	0.196
	2900009J06Rik	2900009J06Rik|-|-|1|1 E3|ncRNA	NR_045298	3.285	0.9295	0.5498	0.793833	0.488403	0.317561	0.410605	0.233618	1.40152	6.43e-05	0.000701	2.04601	3.4e-06	1.85e-05	-1.84	0.00111	0.00412	-0.383321	0.256	0.613	-0.244	0.676	0.803	-0.403526	0.529699	0.73445	3.472	3.35	3.033	1.303	0.699	0.656	1.06	0.211	0.346	0.319	0.838	1.035	0.446	1.554	1.558	0.6	0.309	0.296	6.726	2.927
	2900011O08Rik	2900011O08Rik|MINP|-|16|16 A1|protein-coding	NM_144518	62.725	29.7025	29.7474	55.3622	0.458489	0.222883	0.230561	0.316429	0.823359	0.00748	0.0332	0.736167	0.00013	0.000519	0.00312	0.991	0.995	0.130865	0.613	0.86	0.906	0.00687	0.0313	-0.746074	0.0018952	0.0203039	67.198	67.822	53.155	14.121	27.501	24.533	52.655	23.078	25.454	24.729	37.335	38.141	29.784	65.91	81.379	44.57	57.071	53.459	136.808	133.265
	2900026A02Rik	2900026A02Rik|8430408O14Rik|A530094D01|AW539426|Gm449|Kiaa1671|mKIAA1671|-|5|5 F|protein-coding	NM_172884	7.02867	4.748	3.0822	3.93333	0.515147	0.3052	0.263526	0.55895	0.358359	0.225	0.407	0.863899	0.000938	0.0031	-0.695	0.00712	0.0208	-0.403109	0.137	0.457	-0.305	0.326	0.505	-0.194206	0.470523	0.692554	8.201	7.398	5.487	2.355	4.592	4.312	7.733	1.825	2.311	2.532	3.811	4.932	2.107	2.341	4.839	4.286	4.903	5.124	13.644	15.557
	2900041M22Rik	2900041M22Rik|-|-|11|11 E2|ncRNA	NR_015489	0.0523333	0.03875	0.027	0.172833	0.137358	0.130471	0.0647482	0.202144	0.0600167	0.904	0.951	0.199631	0.784	0.859	1.94	0.0833	0.161	-0.0879129	0.754	1	2.1	0.00949	0.04	-2.60314	0.00925493	0.0615845	0.157	0	0	0.029	0.053	0.032	0.041	0	0.04	0	0.044	0.051	0.028	0.31	0.234	0.23	0.133	0.102	0.381	0.297
	2900052N01Rik	2900052N01Rik|AU067665|-|9|9 A5.3|ncRNA	NR_015605	8.83267	28.4465	54.1718	50.1975	5.5797	4.16067	3.67092	2.30729	-1.75584	5.71e-11	3.42e-09	-2.90199	3.72e-74	1.42e-71	2.72	6.08e-18	1.56e-16	0.949742	4.38e-06	0.000209	0.83	0.00917	0.039	0.22499	0.354701	0.598116	7.406	9.968	9.124	35.731	37.129	20.059	20.867	62.844	50.605	54.478	46.582	56.35	82.186	44.135	46.042	46.592	34.358	47.872	1.583	6.837
	2900055J20Rik	2900055J20Rik|-|-|18|18 B3|ncRNA	NR_045177	2.145	1.4065	1.2626	1.33067	0.676443	0.296793	0.240908	0.404458	0.355578	0.382	0.576	0.343893	0.411	0.546	-0.476	0.214	0.339	0.0288838	0.93	0.978	-0.0511	0.902	0.946	0.113728	0.762735	0.883144	2.16	3.053	1.222	0.482	1.509	1.195	2.44	0.135	1.469	1.606	1.314	1.789	1.885	0.678	1.553	1.36	1.378	1.13	3.171	4.739
	2900057B20Rik	2900057B20Rik|-|-|18|18 E3|ncRNA	NR_045365	0	0	0.0064	0	#DIV/0!	#DIV/0!	#DIV/0!	#DIV/0!	NA	1	1	-0.361269	0.5	1	NA	1	1	0.0784401	0.563	1	NA	1	1	1.64197	0.600694	1	0	0	0	0	0	0	0	0	0	0.032	0	0	0	0	0	0	0	0	0	0
	2900060B14Rik	2900060B14Rik|-|-|1|1 E2.3|ncRNA	NR_027901	0.023	0.03025	0.0278	0.1	0.323944	#DIV/0!	0.280808	#DIV/0!	-0.0695466	0.847	1	-0.166415	0.792	0.865	2.4	0.326	0.462	0.0236643	0.902	1	1.84	0.36	0.538	-1.56213	0.434981	1	0	0	0.069	0	0.03	0	0.091	0	0.089	0	0.05	0	0	0.507	0.093	0	0	0	0.071	0
	2900076A07Rik	2900076A07Rik|WI1-1616M8.2|-|7|7 D3|ncRNA	NR_045299	0.959333	1.26625	1.5296	1.74867	0.303683	0.638231	1.04983	1.2446	-0.480068	0.184	0.356	-0.912817	0.00811	0.0211	1.11	0.0758	0.149	0.328675	0.245	0.6	0.535	0.343	0.522	-0.122811	0.81058	0.908959	1.125	0.709	1.044	0.778	0.93	1.786	1.571	1.15	1.254	1.197	1.473	2.574	0.463	4.585	1.869	1.56	1.05	0.965	3.159	1.984
	2900079G21Rik	2900079G21Rik|C130083B14|Gm6179|-|9 F3|9|ncRNA	NR_015468	4.658	2.828	1.9636	3.27617	0.321485	0.19815	0.208229	0.359189	0.46933	0.234	0.418	0.8625	0.00255	0.00762	-0.331	0.282	0.417	-0.241556	0.452	0.777	0.228	0.605	0.75	-0.571083	0.0747184	0.243752	5.122	4.612	4.24	0.666	2.698	2.515	5.433	0.944	1.264	2.048	2.619	2.943	1.696	4.022	5.227	2.817	3.043	2.852	14.489	14.272
	2900092C05Rik	2900092C05Rik|-|-|7|7 A1|protein-coding	NM_028434	0	0	0	0	#DIV/0!	#DIV/0!	#DIV/0!	#DIV/0!	NA	1	1	NA	1	1	NA	1	1	NA	1	1	NA	1	1	NA	1	1	0	0	0	0	0	0	0	0	0	0	0	0	0	0	0	0	0	0	0	0
	2900092D14Rik	2900092D14Rik|-|-|1|1 B|ncRNA	NR_027891	13.2113	17.0472	18.896	10.188	1.21238	2.0958	1.86664	2.20329	-0.536645	0.0419	0.124	-0.831068	0.000473	0.00168	-0.177	0.644	0.754	0.245233	0.298	0.654	-0.753	0.0411	0.121	1.03648	0.00149688	0.01711	15.949	13.978	9.707	17.337	24.894	14.401	11.557	24.605	18.73	23.387	11.553	16.205	17.092	3.593	8.396	13.481	9.156	9.41	10.897	8.134
	2900097C17Rik	2900097C17Rik|1810005K14Rik|4930563C06Rik|-|2|2 H1|ncRNA	NR_024329	9.349	11.8855	11.924	14.2663	0.308568	0.28174	0.237696	0.181284	-0.522213	0.00544	0.0259	-0.652187	0.00253	0.00756	0.796	1.94e-09	2e-08	0.117449	0.567	0.842	0.253	0.0888	0.209	-0.126031	0.48607	0.702884	10.298	9.715	8.034	11.027	13.874	9.139	13.502	10.363	7.105	13.244	11.435	17.473	12.928	12.8	15.7	14.079	13.692	16.399	30.298	42.186
	3000002C10Rik	3000002C10Rik|-|-|9|9 F2|pseudo	NR_033215	0.522667	0.99475	1.2236	1.70067	0.489847	0.629589	1.20552	1.17938	-0.949276	0.00716	0.032	-1.44454	6.23e-05	0.000263	1.9	6.3e-06	3.82e-05	0.35018	0.225	0.576	0.807	0.0385	0.115	-0.355167	0.335946	0.581716	0.598	0.438	0.532	0.578	0.787	1.357	1.257	0.994	0.751	0.847	1.655	1.871	0.777	2.871	1.705	1.375	1.899	1.577	1.067	1.58
	3010001F23Rik	3010001F23Rik|-|-|X|X F3|ncRNA	NR_045451	0.777667	0.493	0.3288	0.808833	0.445144	0.628827	0.425356	1.26975	0.399894	0.378	0.572	0.775693	0.127	0.22	0.297	0.644	0.754	-0.20873	0.54	0.827	0.81	0.194	0.356	-1.18586	0.0494545	0.186382	0.435	1.005	0.893	0.133	0.47	0.593	0.776	0.445	0.182	0.318	0.543	0.156	0.47	2.112	0.863	0.421	0.325	0.662	1.747	0.784
	3010003L21Rik	3010003L21Rik|-|-|6|6 G3|ncRNA	NR_144294	0.175667	0.1045	0.071	0.0325	1.03333	1.03465	4.17647	0.955882	0.306941	0.564	0.73	0.621595	0.404	0.539	-2.2	0.0749	0.148	-0.204235	0.535	0.825	-1.67	0.046	0.131	1.13	0.310936	0.559358	0.316	0	0.211	0.133	0.102	0.074	0.109	0.167	0.03	0	0.119	0.039	0.075	0.022	0	0.018	0.041	0.039	0.17	0.101
	3100003L05Rik	3100003L05Rik|-|-|7|7 F3|ncRNA	NR_045907	0	0	0	0.0336667	0	0	0	0.295322	NA	1	1	NA	1	1	2.67	0.446	1	NA	1	1	2.16	0.499	1	-1.20566	0.69865	1	0	0	0	0	0	0	0	0	0	0	0	0	0	0	0	0.047	0	0.155	0.064	0.034
	3110002H16Rik	3110002H16Rik|2400010D15Rik|Mic-1|Mic1|-|18|18 A1|protein-coding	NM_029623	10.7093	10.7873	11.274	11.5287	1.10201	1.44003	1.53597	1.2009	-0.203307	0.321	0.512	-0.397261	0.025	0.056	0.28	0.0866	0.166	0.18329	0.268	0.625	0.0666	0.661	0.793	0.127641	0.354265	0.597917	10.867	12.812	8.449	10.367	10.881	12.769	9.132	13.803	11.523	10.925	9.327	10.792	8.574	9.274	13.165	13.084	11.986	13.089	9.718	7.491
	3110009E18Rik	3110009E18Rik|-|-|1|1 E2.3|protein-coding	NM_028439	3.51667	2.75275	3.4434	3.93817	1.03371	1.37706	1.26782	1.7441	0.163293	0.582	0.743	-0.222011	0.483	0.611	0.366	0.308	0.443	0.335601	0.213	0.565	0.534	0.117	0.253	-0.109411	0.743466	0.872148	3.796	3.039	3.715	2.825	1.912	3.374	2.9	4.2	3.928	2.049	2.563	4.477	2.915	6.351	4.122	2.714	4.24	3.287	3.402	1.999
	3110009F21Rik	3110009F21Rik|-|-|12|12 F1|ncRNA	NR_045466	0	0.006	0	0	#DIV/0!	0.428571	#DIV/0!	#DIV/0!	-0.142496	0.61	1	NA	1	1	NA	1	1	-0.0194465	0.886	1	-1.27	0.691	1	NA	1	1	0	0	0	0.024	0	0	0	0	0	0	0	0	0	0	0	0	0	0	0	0.014
	3110015C05Rik	3110015C05Rik|-|-|13|13 D2.2|ncRNA	NR_045908	0.0293333	0.0355	0	0.0095	0.322344	1.47917	0	0.146154	-0.112519	0.816	1	0.248471	0.662	1	-1.29	0.545	1	-0.116967	0.487	1	-1.7	0.357	1	-0.110734	0.971918	1	0.02	0.046	0.022	0	0.038	0.046	0.058	0	0	0	0	0	0	0	0.02	0	0	0.037	0.091	0.024
	3110021A11Rik	3110021A11Rik|-|-|6|6 F1|ncRNA	NR_030776	0.0253333	0.011	0.049	0.023	0.0978121	0.203704	0.227907	0.418182	0.0963701	0.781	1	-0.57563	0.441	0.573	-0.0426	0.984	1	0.235248	0.286	1	0.681	0.768	1	1.46313	0.343908	1	0	0.026	0.05	0	0.044	0	0	0	0.129	0.08	0.036	0	0	0	0.022	0.075	0	0.041	0.259	0.054
	3110035E14Rik	3110035E14Rik|AI415019|AV164974|R75066|-|1|1 A2|protein-coding	NM_178399	26.2157	38.1545	27.248	30.5582	0.715571	0.376537	0.196409	0.228778	-0.66926	0.0122	0.0485	-0.37572	0.00596	0.0161	0.385	0.046	0.0995	-0.296426	0.174	0.512	-0.333	0.196	0.358	-0.000835283	0.995875	0.998672	28.839	26.165	23.643	20.796	42.65	31.55	57.622	24.774	24.638	24.627	27.405	34.796	21.959	22.921	37.288	33.176	25.606	42.399	36.636	101.33
	3110039I08Rik	3110039I08Rik|2610203C20Rik|AI848448|D230004N17Rik|D3Mgi9|Mir100hg|-|9|9 A5.1|ncRNA	NR_015483	3.48167	2.68125	4.1114	3.051	0.222556	0.347042	0.713042	1.11595	0.184062	0.445	0.632	-0.546089	0.0183	0.0428	-0.00546	0.985	0.991	0.70347	6.75e-05	0.00206	0.187	0.403	0.582	0.570836	0.00796955	0.0554899	4.367	2.361	3.717	2.172	2.663	2.755	3.135	3.151	4.555	3.575	3.866	5.41	4.038	1.963	3.189	2.799	2.624	3.693	15.644	7.726
	3110039M20Rik	3110039M20Rik|-|-|12|12 B3|ncRNA	NR_026733	1.71333	0.95725	1.2274	1.13667	0.27621	0.251709	0.354637	0.261543	0.59353	0.0735	0.187	0.223494	0.626	0.737	-0.433	0.278	0.411	0.277533	0.395	0.74	0.229	0.545	0.704	0.202881	0.661574	0.824962	1.414	1.692	2.034	0.73	0.928	0.764	1.407	2.179	1.189	0.289	0.875	1.605	0.66	1.199	2.234	0.76	0.964	1.003	6.203	3.803
	3110040N11Rik	3110040N11Rik|AI851475|-|7|7 D3|protein-coding	NM_026077	6.25133	3.695	2.8804	4.122	0.697382	0.58061	0.611161	0.727626	0.545118	0.0247	0.0835	0.773669	0.00117	0.00378	-0.389	0.239	0.369	-0.190531	0.402	0.744	0.178	0.567	0.721	-0.39532	0.178142	0.408905	5.661	6.524	6.569	3.723	2.701	3.874	4.482	3.215	2.38	2.488	3.748	2.571	3.348	6.714	4.56	3.298	3.399	3.413	8.964	6.364
	3110043O21Rik	3110043O21Rik|AI840585|-|4|4 A5|protein-coding	NM_001081343	7.69467	6.6005	4.8592	3.97983	0.548835	0.687695	0.721699	0.557947	0.0213971	0.905	0.951	0.328258	0.0441	0.091	-0.778	6.42e-06	3.89e-05	-0.290002	0.0762	0.329	-0.76	1.06e-05	0.000145	0.451979	0.005665	0.0439578	8.472	7.477	7.135	7.089	6.697	6.883	5.733	4.933	5.249	5.729	3.926	4.459	4.091	2.456	4.746	4.574	4.133	3.879	14.02	9.598
	3110045C21Rik	3110045C21Rik|AI838577|-|1|1 H3|ncRNA	NR_040438	1.03333	1.13825	1.432	0.933333	1.61711	1.87521	1.5719	1.45833	-0.293891	0.336	0.528	-0.719182	0.0198	0.0457	0.0357	0.931	0.958	0.364055	0.132	0.449	-0.288	0.415	0.593	0.732621	0.0302697	0.135309	0.793	1.215	1.092	1.098	0.951	1.11	1.394	2.155	1.317	1.246	1.236	1.206	1.34	0.3	0.864	1.224	0.756	1.116	0.639	0.607
	3110056K07Rik	3110056K07Rik|4921536K06Rik|-|12|12 C2|ncRNA	NR_045056	1.984	1.7395	3.0554	3.767	0.740575	0.879868	0.927002	1.69914	0.00985789	0.973	0.987	-0.898454	0.0023	0.00695	1.13	0.00132	0.00478	0.811865	0.000781	0.0138	1.14	0.000236	0.00205	-0.187294	0.528131	0.732971	1.469	2.574	1.909	1.29	1.709	1.628	2.331	2.559	2.42	2.107	3.774	4.417	3.027	5.616	4.259	4.173	2.245	3.282	2.679	1.977
	3110062M04Rik	3110062M04Rik|AL023049|Mri|-|6|6 B1|protein-coding	NM_199145	0.987	0.7505	0.6422	0.822	0.821131	0.711374	0.653971	0.876333	0.19188	0.46	0.645	0.304054	0.242	0.369	-0.065	0.851	0.904	-0.093373	0.686	0.897	0.133	0.676	0.803	-0.236156	0.430526	0.661977	1.145	0.786	1.03	0.814	0.574	0.699	0.915	0.63	0.472	0.503	0.761	0.845	0.508	1.291	0.973	0.712	0.585	0.863	1.202	1.055
	3110070M22Rik	3110070M22Rik|-|-|13|13 D2.3|ncRNA	NR_027974	0.820667	1.14725	0.8298	1.161	1.20686	0.595047	0.675733	0.912736	-0.575893	0.116	0.259	-0.302993	0.469	0.6	0.716	0.0618	0.127	-0.236537	0.448	0.776	0.046	0.9	0.945	-0.380244	0.318344	0.565555	0.661	1.125	0.676	0.879	0.86	0.846	2.004	0.433	0.52	0.538	1.083	1.575	1.08	1.811	1.179	1.011	0.855	1.03	0.68	1.928
	3110079O15Rik	3110079O15Rik|Snorc|-|1|1 D|protein-coding	NM_028473	3.526	5.25225	1.0804	0.795667	7.56652	5.15432	1.39767	0.481638	-0.628313	0.091	0.217	1.31681	0.00213	0.00647	-1.95	0.00381	0.0121	-1.60937	7.49e-08	6.41e-06	-2.7	1.96e-06	3.27e-05	0.532235	0.371081	0.613061	2.632	2.446	5.5	4.716	2.709	5.783	7.801	0.854	1.049	0.682	1.173	1.644	0.287	2.233	0.606	0.27	0.781	0.597	0.466	1.019
	3110082I17Rik	3110082I17Rik|AW411904|-|5|5 G2|protein-coding	NM_028469	6.42967	4.25525	3.081	4.4365	1.17437	0.764645	0.647133	0.818693	0.389129	0.0748	0.189	0.730007	1.88e-05	8.86e-05	-0.326	0.272	0.406	-0.301748	0.119	0.421	0.0762	0.789	0.881	-0.402811	0.10673	0.304785	6.54	6.741	6.008	3.953	3.652	3.576	5.84	2.752	2.893	2.774	3.276	3.71	3.27	6.706	5.115	3.411	4.244	3.873	5.475	5.565
	3110082J24Rik	3110082J24Rik|ENSMUSG00000073106|-|5 B1|5|protein-coding	NM_001256263	6.36967	11.577	12.0154	12.1205	8.14535	8.84416	8.63175	5.94142	-0.954916	0.00129	0.00819	-1.18386	1.74e-05	8.26e-05	1.15	0.00103	0.00384	0.155753	0.537	0.826	0.0955	0.773	0.871	0.0923111	0.753822	0.877312	4.837	6.431	7.841	12.001	6.568	14.953	12.786	10.502	12.648	7.036	14.926	14.965	12.038	19.343	12.037	9.54	9.597	10.168	0.782	1.309
	3110099E03Rik	3110099E03Rik|-|-|2|2 E4|ncRNA	NR_030712	1.21433	0.8225	0.723	0.2455	6.86064	5.44702	4.32934	1.87405	0.333469	0.214	0.394	0.413566	0.0884	0.163	-2.08	2.11e-06	1.39e-05	-0.0535196	0.82	0.944	-1.72	2.91e-05	0.000346	1.66128	8.98e-06	0.000376656	1.265	1.099	1.279	0.985	0.931	0.787	0.587	0.628	0.887	0.621	0.755	0.724	0.475	0.114	0.335	0.233	0.135	0.181	0.177	0.151
	3200001D21Rik	3200001D21Rik|-|-|12|12 D2|ncRNA	NR_045888	0.25	0.16575	0.1074	0.112333	0.515464	0.426093	0.378169	0.484195	0.33628	0.484	0.665	0.718406	0.205	0.324	-1.01	0.12	0.216	-0.181059	0.595	0.854	-0.549	0.453	0.627	0.136655	0.850461	0.930925	0.26	0.273	0.217	0.043	0.063	0.247	0.31	0.086	0.047	0.036	0.248	0.12	0.008	0.166	0.162	0.122	0.156	0.06	0.485	0.389
	3300002I08Rik	3300002I08Rik|2900016H11Rik|-|2|2 G3|protein-coding	NM_027017	1.75733	1.90425	1.1712	1.09683	1.47304	1.57506	1.50154	1.45855	-0.267954	0.387	0.58	0.275248	0.44	0.572	-0.461	0.394	0.53	-0.479668	0.0733	0.321	-0.772	0.0974	0.223	0.199852	0.668842	0.82902	1.487	2.277	1.508	1.573	1.621	2.092	2.331	1.064	1.327	0.817	1.159	1.489	0.525	2.414	1.322	0.624	1.111	0.585	1.193	1.209
	3300002P13Rik	3300002P13Rik|-|-|7 A1|7|ncRNA	NR_126426	3.213	5.0885	4.1878	6.4235	0.470149	0.297504	0.399371	0.890298	-0.776013	0.0126	0.0497	-0.693366	0.0197	0.0454	1.16	0.0129	0.0344	-0.10363	0.707	0.904	0.307	0.498	0.664	-0.439975	0.280238	0.527209	3.574	3.608	2.457	3.153	8.788	4.094	4.319	4.656	3.322	6.964	2.677	3.32	7.969	0.971	6.231	7.856	5.4	10.114	6.834	17.104
	3300005D01Rik	3300005D01Rik|-|-|17|17 A1|ncRNA	NR_045080	0	0	0	0	#DIV/0!	#DIV/0!	#DIV/0!	#DIV/0!	NA	1	1	NA	1	1	NA	1	1	NA	1	1	NA	1	1	NA	1	1	0	0	0	0	0	0	0	0	0	0	0	0	0	0	0	0	0	0	0	0
	3425401B19Rik	3425401B19Rik|-|-|14|14 B|protein-coding	NM_001195097	0	0.11375	0.227	0.176	0	5.6875	4.28302	8	-3.30981	2.04e-10	1.07e-08	-5.50029	9.63e-18	1.98e-16	8.2	1.23e-05	7.09e-05	0.760589	0.0197	0.143	0.625	0.424	0.6	0.518254	0.447748	0.675172	0	0	0	0.091	0.23	0.055	0.079	0.159	0.125	0.438	0.253	0.16	0.426	0	0.343	0.117	0.071	0.099	0.015	0.02
	3632451O06Rik	3632451O06Rik|AU067705|-|14|14 C1|protein-coding	NM_026142	7.01433	4.11325	3.1542	4.4125	0.865967	0.538172	0.426128	0.613785	0.545546	0.0371	0.113	0.789869	0.00231	0.00698	-0.509	0.0464	0.1	-0.194251	0.424	0.757	0.0726	0.783	0.877	-0.29966	0.238703	0.478648	6.94	8.76	5.343	2.482	5.792	3.845	4.334	3.85	3.267	4.341	2.218	2.095	4.027	1.96	5.595	5.377	5.003	4.513	8.1	7.643
	3632454L22Rik	3632454L22Rik|-|-|X|X E3-F1|ncRNA	NR_040282	0.09	0.0475	0.033	0.0436667	0.190678	0.17148	0.115789	0.236036	0.503152	0.316	0.507	0.9233	0.165	0.273	-0.688	0.259	0.391	-0.17825	0.59	0.853	0.0509	0.934	0.964	-0.535294	0.478611	0.698192	0.065	0.141	0.064	0.033	0.031	0.025	0.101	0.028	0.076	0.005	0.017	0.039	0.032	0.021	0.058	0.061	0.051	0.039	0.472	0.277
	3830403N18Rik	3830403N18Rik|Xlrl|-|X|X A5|protein-coding	NM_027510	0	0.00675	0	0.0145	0	0.306818	0	0.193333	-0.0897196	0.748	1	NA	1	1	2.07	0.522	1	0.00913838	0.946	1	0.841	0.727	1	-0.614888	0.84407	1	0	0	0	0	0	0	0.027	0	0	0	0	0	0	0	0.018	0	0.035	0.034	0.084	0.022
	3830406C13Rik	3830406C13Rik|-|-|14|14 A1|protein-coding	NM_001284386	6.72233	7.39325	8.667	6.3405	0.515082	0.694397	1.01049	0.804836	-0.328498	0.0794	0.197	-0.688701	7.79e-05	0.000323	0.111	0.598	0.718	0.339419	0.0476	0.247	-0.232	0.247	0.418	0.597427	0.00138388	0.0161268	7.157	6.295	6.715	8.167	7.969	6.855	6.582	10.211	9.749	7.874	6.805	8.696	7.731	4.36	5.943	6.921	5.828	7.26	13.051	10.647
	3830408C21Rik	3830408C21Rik|-|-|13|13 D2.1|ncRNA	NR_015471	0.435	0.414	0.4504	0.418	0.186136	0.30486	0.53619	0.476625	-0.112012	0.738	0.852	-0.327094	0.401	0.536	0.117	0.73	0.818	0.174002	0.553	0.835	-0.0155	0.959	0.979	0.23542	0.494317	0.708445	0.413	0.533	0.359	0.379	0.388	0.343	0.546	0.412	0.281	0.277	0.597	0.685	0.287	0.519	0.468	0.407	0.358	0.469	2.337	1.358
	3830417A13Rik	3830417A13Rik|-|-|X|X A7.1|protein-coding	NM_027512	0	0	0	0	#DIV/0!	#DIV/0!	#DIV/0!	#DIV/0!	NA	1	1	NA	1	1	NA	1	1	NA	1	1	NA	1	1	NA	1	1	0	0	0	0	0	0	0	0	0	0	0	0	0	0	0	0	0	0	0	0
	3830432H09Rik	3830432H09Rik|-|-|1|1 E2.3|ncRNA	NR_126486	0.0266667	0.035	0.0054	0.0205	#DIV/0!	1.94444	0.45	1.57692	-0.254156	0.63	0.779	0.38962	0.565	0.686	-0.103	0.944	0.966	-0.338927	0.201	1	-0.796	0.426	0.602	-1.10598	0.491989	1	0.071	0	0.009	0.048	0.022	0.036	0.034	0	0	0.027	0	0	0.023	0.063	0.008	0	0.015	0.014	0	0.018
	3930402G23Rik	3930402G23Rik|-|-|8|8 A1.1|ncRNA	NR_030715	0.300667	0.35625	0.1358	0.179167	1.43175	0.87963	0.936552	2.42117	-0.339192	0.39	0.583	0.782282	0.0771	0.145	-0.521	0.344	0.481	-0.788453	0.0171	0.131	-0.932	0.0873	0.206	-0.305632	0.578375	0.768644	0.316	0.325	0.261	0.382	0.139	0.32	0.584	0.103	0.187	0.058	0.115	0.216	0.105	0.412	0.162	0.065	0.151	0.18	0.21	0.405
	4430402I18Rik	4430402I18Rik|AW122618|Spata6l|-|19|19 C1|protein-coding	NM_198651	0.749333	1.1145	0.9832	1.1595	0.672048	0.514068	0.679475	0.661815	-0.686738	0.0232	0.0797	-0.706436	0.00787	0.0206	0.848	0.00817	0.0235	-0.0180493	0.942	0.981	0.0937	0.764	0.865	-0.115041	0.672541	0.830732	0.67	0.865	0.713	0.636	1.545	1.054	1.223	0.868	0.698	0.974	1.226	1.15	1.41	1.503	1.114	1.009	0.851	1.07	1.115	2.168
	4631405J19Rik	4631405J19Rik|-|-|2|2 E1|ncRNA	NR_110333	0.0463333	0.0055	0.0432	0	0.671498	#DIV/0!	#DIV/0!	#DIV/0!	0.423312	0.292	1	-0.0580642	0.937	0.962	-3.23	0.31	1	0.209817	0.292	1	-0.583	0.857	1	3.41326	0.191031	1	0.016	0.123	0	0	0	0	0.022	0	0	0	0.049	0.167	0	0	0	0	0	0	0.069	0
	4632404H12Rik	4632404H12Rik|-|-|3|3 F1|ncRNA	NR_130957	0.759667	0.729	0.9812	0.8295	0.386993	0.399015	0.391384	0.400145	-0.130298	0.647	0.792	-0.6759	0.00617	0.0166	0.278	0.367	0.504	0.485603	0.0333	0.199	0.135	0.647	0.782	0.422225	0.09898	0.290894	0.809	0.904	0.566	0.652	0.73	0.5	1.034	0.794	0.885	0.834	1.05	1.343	0.521	0.384	1.245	1.076	0.883	0.868	1.963	1.827
	4632415L05Rik	4632415L05Rik|AI662792|-|3|3 A2|pseudo	NR_027985	3.935	4.94875	4.7774	3.896	0.512437	0.830188	0.995707	1.17314	-0.50602	0.0136	0.0527	-0.600792	5.99e-06	3.12e-05	0.179	0.501	0.634	0.0765533	0.632	0.871	-0.35	0.172	0.329	0.431315	0.0412645	0.16632	3.863	4.045	3.897	5.292	6.124	4.171	4.208	4.413	4.893	5.206	4.278	5.097	5.726	2.509	3.738	4.419	3.573	3.411	7.679	5.961
	4632427E13Rik	4632427E13Rik|AU015482|-|7|7 E1|ncRNA	NR_015510	0.237	0.15175	0.2502	0.3695	1.24084	0.380326	0.566063	1.16562	0.248202	0.636	0.783	-0.340283	0.59	0.707	0.931	0.354	0.491	0.369954	0.278	0.635	1.34	0.152	0.303	-0.486608	0.580072	0.769059	0.143	0.29	0.278	0.204	0.134	0.065	0.204	0.146	0.16	0.147	0.491	0.307	0.112	1.473	0.194	0.231	0.053	0.154	0.191	0.399
	4632428C04Rik	4632428C04Rik|Gm4231|-|16 B2|16|ncRNA	NR_033631	0.063	0.07675	0.0396	0.100833	0.398734	0.350457	0.148315	0.386335	-0.256	0.625	0.774	0.259036	0.726	0.817	0.843	0.24	0.37	-0.258673	0.414	0.751	0.42	0.503	0.669	-1.31111	0.124722	0.332449	0.024	0.106	0.059	0.024	0.059	0.089	0.135	0.04	0	0	0.074	0.084	0.031	0.171	0.114	0.102	0.074	0.113	0.158	0.219
	4732416N19Rik	4732416N19Rik|-|-|6|6 G3|ncRNA	NR_015615	1.24567	1.219	1.0108	1.47283	0.272277	0.249488	0.150708	0.396776	-0.0888706	0.832	0.907	0.0011322	0.998	0.999	0.355	0.509	0.64	-0.064175	0.845	0.954	0.236	0.667	0.797	-0.335934	0.498639	0.711582	1.322	1.214	1.201	0.424	0.882	1.736	1.834	0.889	1.261	0.538	1.247	1.119	0.409	0.413	1.244	2.132	2.339	2.3	4.575	4.886
	4732471J01Rik	4732471J01Rik|-|-|7|7 A3|ncRNA	NR_073028	2.00433	2.2285	1.9228	2.38133	1.54775	2.06534	2.07646	1.76788	-0.33559	0.183	0.354	-0.284096	0.313	0.45	0.412	0.144	0.249	-0.0516258	0.824	0.946	0.0513	0.839	0.911	-0.114544	0.668671	0.82902	2.072	2.311	1.63	2.481	2.056	2.197	2.18	1.188	1.944	1.63	2.567	2.285	1.158	2.338	2.901	2.687	2.677	2.527	1.295	1.079
	4732490B19Rik	4732490B19Rik|-|-|11|11 E2|ncRNA	NR_040276	0	0	0	0	0	0	#DIV/0!	#DIV/0!	NA	1	1	NA	1	1	NA	1	1	NA	1	1	NA	1	1	NA	1	1	0	0	0	0	0	0	0	0	0	0	0	0	0	0	0	0	0	0	0.052	0.009
	4732491K20Rik	4732491K20Rik|-|-|17|17 A1|ncRNA	NR_045290	0.927	0.667	0.6812	0.972167	0.863128	0.801683	0.916824	0.816947	0.262647	0.344	0.537	0.12634	0.621	0.733	0.295	0.527	0.658	0.135366	0.503	0.807	0.579	0.161	0.314	-0.417444	0.260685	0.505228	0.68	1.023	1.078	0.667	0.763	0.492	0.746	0.677	0.604	0.724	0.648	0.753	1.009	1.763	1.391	0.583	0.495	0.592	1.074	0.832
	4831407H17Rik	4831407H17Rik|-|-|14|14 B|ncRNA	NR_131095	0	0	0.005	0.0468333	#DIV/0!	0	0.05	0.368766	NA	1	1	-0.296912	0.579	1	4.09	0.0548	0.115	0.0614787	0.649	1	3.58	0.0651	0.168	-1.96885	0.258149	1	0	0	0	0	0	0	0	0	0	0	0.025	0	0	0.128	0.094	0	0.03	0.029	0	0.037
	4831440E17Rik	4831440E17Rik|-|-|5|5 B1|ncRNA	NR_030700	0.128667	0.12375	0.1504	0.154	0.235653	0.511364	0.486731	1.16667	-0.103725	0.784	0.879	-0.482632	0.272	0.404	0.464	0.274	0.408	0.281942	0.378	0.726	0.339	0.399	0.577	0.072176	0.867278	0.939414	0.147	0.129	0.11	0.079	0.119	0.111	0.186	0.042	0.194	0.109	0.115	0.292	0.128	0.259	0.162	0.105	0.153	0.117	0.546	0.242
	4833411C07Rik	4833411C07Rik|-|-|8|8 A1.1|ncRNA	NR_102285	0	0.1125	0.2112	0.181	#DIV/0!	1.52027	0.782222	1.79208	-1.30218	0.011	0.0447	-3.31123	5.73e-06	3e-05	6.07	1.2e-05	6.92e-05	0.439042	0.198	0.546	0.661	0.336	0.514	0.335169	0.582896	0.771546	0	0	0	0.081	0.165	0	0.204	0.326	0.178	0.123	0.372	0.057	0.281	0.158	0.154	0.257	0.179	0.057	0	0.074
	4833412C05Rik	4833412C05Rik|Bigheart|-|7|7 C|ncRNA	NR_045954	0.204333	0.08325	0.0892	0.2795	0.136404	0.126712	0.105437	0.392006	0.700687	0.179	0.35	0.572584	0.381	0.517	0.598	0.383	0.519	0.133269	0.686	0.897	1.74	0.0159	0.059	-1.35775	0.0640421	0.220623	0.301	0.159	0.153	0.036	0.066	0.08	0.151	0	0.197	0.076	0.11	0.063	0.035	0.35	0.291	0.285	0.495	0.221	1.498	0.657
	4833415N18Rik	4833415N18Rik|-|-|16|16 A1|ncRNA	NR_126430	0.161	0.08	0.1556	0.2375	0.419271	0.0857449	0.150629	0.145349	0.399739	0.456	0.642	-0.167303	0.802	0.872	0.726	0.405	0.542	0.334734	0.302	0.658	1.51	0.0952	0.219	-0.496149	0.541273	0.74219	0.249	0.172	0.062	0.039	0.09	0	0.191	0.196	0	0.099	0.209	0.274	0.056	0.265	0.259	0.031	0.643	0.171	0.384	0.933
	4833417C18Rik	4833417C18Rik|-|-|11|11 D|ncRNA	NR_045187	0.0996667	0.11325	0.1016	0.0723333	3.11458	0.838889	4.61818	0.331804	-0.252542	0.624	0.774	-0.396497	0.558	0.679	-0.208	0.824	0.885	0.0829497	0.808	0.939	-0.591	0.444	0.619	0.744475	0.392834	0.632594	0.058	0.147	0.094	0.088	0.163	0.099	0.103	0	0.081	0.149	0.226	0.052	0.171	0	0.056	0.047	0.108	0.052	0.032	0.135
	4833418N02Rik	4833418N02Rik|-|-|17|17 E4|ncRNA	NR_015506	0.145333	0.14625	0.2242	0.2565	1.29762	1.00862	0.893227	0.925993	-0.0822979	0.878	0.935	-0.749228	0.193	0.309	1.01	0.065	0.132	0.334332	0.326	0.681	0.883	0.168	0.323	-0.125634	0.784728	0.895066	0.1	0.268	0.068	0	0.165	0.313	0.107	0.192	0.175	0.097	0.254	0.403	0.221	0.149	0.351	0.222	0.327	0.269	0.112	0.145
	4833419F23Rik	4833419F23Rik|-|-|18|18 A1|ncRNA	NR_040328	0.00766667	0	0.0136	0.0266667	#DIV/0!	0	0.0673267	0.0703606	0.0334247	0.905	1	-0.221993	0.682	1	1.79	0.469	1	0.0844658	0.534	1	2.23	0.402	1	-0.0710684	0.974169	1	0	0	0.023	0	0	0	0	0	0	0	0.068	0	0	0	0.084	0.035	0.041	0	0	0.051
	4833420G17Rik	4833420G17Rik|2210017J06Rik|5730533D17Rik|AW107518|C85193|-|13|13 D2.3|protein-coding	NM_001113550	6.522	4.27325	4.237	5.45567	0.70265	0.630831	0.632482	0.750745	0.410624	0.0302	0.097	0.287583	0.0883	0.163	-0.115	0.668	0.771	0.1301	0.389	0.734	0.307	0.206	0.37	-0.171888	0.438442	0.667655	5.858	7.492	6.216	3.505	4.655	4.69	4.243	3.852	4.91	4.408	3.933	4.082	2.773	3.308	6.21	7.054	7.36	6.029	9.282	6.774
	4833422C13Rik	4833422C13Rik|-|-|13 C3|13|ncRNA	NR_015501	11.335	3.9145	2.79	3.0255	0.373821	0.390162	0.298747	0.322927	1.27685	4.03e-09	1.56e-07	1.66083	2.5e-19	6e-18	-1.72	7.77e-20	2.37e-18	-0.331993	0.0377	0.215	-0.392	0.0126	0.0493	0.0404742	0.767528	0.886585	13.791	12.26	7.954	3.463	4.012	3.281	4.902	2.763	2.845	3.052	2.318	2.972	2.729	2.153	3.435	3.085	3.635	3.116	30.322	10.033
	4833422M21Rik	4833422M21Rik|4933406G12Rik|-|15|15 F1|ncRNA	NR_130160	0.00466667	0	0	0	0.0740741	0	0	0	0.0334247	0.905	1	-0.0715375	0.894	1	-0.315	0.929	1	NA	1	1	NA	1	1	NA	1	1	0.014	0	0	0	0	0	0	0	0	0	0	0	0	0	0	0	0	0	0.063	0.049
	4833423E24Rik	4833423E24Rik|Fads2p1|Gm113|-|2|2 D|protein-coding	NM_001081664	0	0.00275	0	0.00333333	0	0.101852	#DIV/0!	#DIV/0!	-0.0897196	0.748	1	NA	1	1	1.13	0.75	1	0.00913838	0.946	1	-0.102	0.975	1	0.335438	0.915169	1	0	0	0	0	0.011	0	0	0	0	0	0	0	0	0	0	0	0	0.02	0.025	0.027
	4833427F10Rik	4833427F10Rik|-|-|17|17 B1|ncRNA	NR_045459	0	0	0	0	0	#DIV/0!	#DIV/0!	#DIV/0!	NA	1	1	NA	1	1	NA	1	1	NA	1	1	NA	1	1	NA	1	1	0	0	0	0	0	0	0	0	0	0	0	0	0	0	0	0	0	0	0.058	0
	4833427G06Rik	4833427G06Rik|-|-|9|9 A5.3|protein-coding	NM_177702	0.0593333	0.04025	0.1324	0.0768333	0.2142	0.462644	3.48421	#DIV/0!	0.112036	0.815	1	-0.725736	0.336	0.471	0.537	0.715	0.808	0.372118	0.194	0.541	0.952	0.473	0.644	0.864969	0.457295	0.681674	0.124	0	0.054	0	0.07	0.056	0.035	0.382	0	0.086	0.194	0	0.098	0	0.024	0.161	0	0.178	0.277	0.087
	4833428L15Rik	4833428L15Rik|-|-|9|9 A5.2|ncRNA	NR_040732	0.005	0	0	0.00816667	#DIV/0!	0	0	#DIV/0!	0.0334247	0.905	1	-0.0715375	0.894	1	0.701	0.843	1	NA	1	1	1.15	0.72	1	-0.199571	0.949398	1	0.015	0	0	0	0	0	0	0	0	0	0	0	0	0	0	0.049	0	0	0	0.053
	4833439L19Rik	4833439L19Rik|4930558H15Rik|C81457|Kiaa1191|P33monox|-|13|13 B1|protein-coding	NM_001252648	85.0597	86.702	79.138	68.9967	1.68542	1.47508	1.47023	1.09048	-0.217504	0.229	0.412	-0.226237	0.0604	0.119	-0.0891	0.618	0.734	0.00508627	0.972	0.99	-0.318	0.0727	0.182	0.324695	0.0186548	0.0982894	82.643	91.767	80.769	89.422	69.959	90.53	96.897	84.797	72.985	71.713	76.855	89.34	63.032	75.623	67.295	73.607	64.426	69.997	50.468	58.778
	4921501E09Rik	4921501E09Rik|PHF8|-|17|17 B1|protein-coding	NM_001009544	0	0	0	0.003	#DIV/0!	#DIV/0!	#DIV/0!	#DIV/0!	NA	1	1	NA	1	1	1.91	0.588	1	NA	1	1	1.4	0.663	1	-0.447109	0.886755	1	0	0	0	0	0	0	0	0	0	0	0	0	0	0	0.009	0	0.009	0	0	0
	4921504A21Rik	4921504A21Rik|-|-|5|5 A3|ncRNA	NR_102342	0.465333	0.44525	0.2956	0.312333	1.88394	0.987251	0.90122	0.450048	-0.120331	0.697	0.825	0.265731	0.469	0.6	-0.38	0.359	0.495	-0.327757	0.232	0.584	-0.512	0.155	0.305	0.0927168	0.813469	0.909767	0.416	0.531	0.449	0.461	0.426	0.42	0.474	0.331	0.232	0.357	0.36	0.198	0.317	0.293	0.563	0.224	0.328	0.149	0.247	0.451
	4921504E06Rik	4921504E06Rik|4921522E24Rik|-|2 A3|2|protein-coding	NM_027600	0.00966667	0.01925	0	0	0.460317	#DIV/0!	#DIV/0!	#DIV/0!	-0.235237	0.574	1	0.126554	0.815	1	-1.65	0.631	1	-0.115021	0.454	1	-2.99	0.295	1	NA	1	1	0.029	0	0	0.059	0.018	0	0	0	0	0	0	0	0	0	0	0	0	0	0.021	0
	4921507P07Rik	4921507P07Rik|TISP74|-|6|6 B2.3|protein-coding	NM_027564	0.245	0.12375	0.0814	0.1005	0.284223	0.249496	0.207125	0.302711	0.654643	0.123	0.27	0.970696	0.0686	0.132	-1.1	0.0364	0.0821	-0.182006	0.595	0.854	-0.293	0.582	0.733	-0.0406234	0.946937	0.979	0.247	0.204	0.284	0.142	0.07	0.131	0.152	0.042	0.023	0.113	0.141	0.088	0.105	0.081	0.151	0.027	0.092	0.147	0.862	0.496
	4921508D12Rik	4921508D12Rik|-|-|2|2 F2|ncRNA	NR_045802	0.006	0.00625	0	0	#DIV/0!	#DIV/0!	#DIV/0!	#DIV/0!	-0.0193514	0.945	1	-0.0715375	0.894	1	-0.315	0.929	1	0.00913838	0.946	1	-0.583	0.857	1	NA	1	1	0.018	0	0	0	0	0	0.025	0	0	0	0	0	0	0	0	0	0	0	0	0
	4921509C19Rik	4921509C19Rik|Gm1005|-|2|2 G3|protein-coding	NM_198655	0	0	0	0	#DIV/0!	#DIV/0!	#DIV/0!	#DIV/0!	NA	1	1	NA	1	1	NA	1	1	NA	1	1	NA	1	1	NA	1	1	0	0	0	0	0	0	0	0	0	0	0	0	0	0	0	0	0	0	0	0
	4921509O07Rik	4921509O07Rik|-|-|13|13 D2.2|ncRNA	NR_045501	0	0.00175	0	0	#DIV/0!	0.194444	#DIV/0!	#DIV/0!	-0.0897196	0.748	1	NA	1	1	NA	1	1	0.00913838	0.946	1	-0.583	0.857	1	NA	1	1	0	0	0	0	0.007	0	0	0	0	0	0	0	0	0	0	0	0	0	0	0.009
	4921511C10Rik	4921511C10Rik|-|-|3|3 E3|ncRNA	NR_045502	0	0	0.004	0.004	#DIV/0!	0	#DIV/0!	#DIV/0!	NA	1	1	-0.296912	0.579	1	1.13	0.75	1	0.0614787	0.649	1	0.619	0.848	1	1.03459	0.741676	1	0	0	0	0	0	0	0	0	0	0	0.02	0	0	0	0	0	0.024	0	0	0.015
	4921511C20Rik	4921511C20Rik|Gm383|-|X|X E3|pseudo	NR_003646	0	0	0	0	#DIV/0!	#DIV/0!	#DIV/0!	#DIV/0!	NA	1	1	NA	1	1	NA	1	1	NA	1	1	NA	1	1	NA	1	1	0	0	0	0	0	0	0	0	0	0	0	0	0	0	0	0	0	0	0	0
	4921511H03Rik	4921511H03Rik|-|-|5|5 A1|protein-coding	NM_027603	0	0	0	0	#DIV/0!	#DIV/0!	0	#DIV/0!	NA	1	1	NA	1	1	NA	1	1	NA	1	1	NA	1	1	NA	1	1	0	0	0	0	0	0	0	0	0	0	0	0	0	0	0	0	0	0	0	0
	4921511I17Rik	4921511I17Rik|-|-|12|12 A1.1|ncRNA	NR_045829	1.70867	1.2095	0.815	0.817833	0.238341	0.254846	0.253184	0.441356	0.288564	0.375	0.569	0.683374	0.0302	0.0656	-0.906	0.0431	0.0943	-0.318704	0.233	0.586	-0.591	0.154	0.305	0.193081	0.616535	0.795162	2.43	1.416	1.28	0.756	0.953	1.459	1.67	0.584	0.996	0.712	0.914	0.869	0.715	0.17	0.594	0.945	1.308	1.175	7.169	4.746
	4921511M17Rik	4921511M17Rik|-|-|X|X F3|protein-coding	NM_001201358	0	0	0	0	#DIV/0!	#DIV/0!	#DIV/0!	#DIV/0!	NA	1	1	NA	1	1	NA	1	1	NA	1	1	NA	1	1	NA	1	1	0	0	0	0	0	0	0	0	0	0	0	0	0	0	0	0	0	0	0	0
	4921513I03Rik	4921513I03Rik|-|-|10|10 D2|ncRNA	NR_038003	0	0	0	0	#DIV/0!	#DIV/0!	#DIV/0!	#DIV/0!	NA	1	1	NA	1	1	NA	1	1	NA	1	1	NA	1	1	NA	1	1	0	0	0	0	0	0	0	0	0	0	0	0	0	0	0	0	0	0	0	0
	4921515E04Rik	4921515E04Rik|-|-|15|15 A2|ncRNA	NR_045711	0	0	0	0	#DIV/0!	0	0	#DIV/0!	NA	1	1	NA	1	1	NA	1	1	NA	1	1	NA	1	1	NA	1	1	0	0	0	0	0	0	0	0	0	0	0	0	0	0	0	0	0	0	0	0.01
	4921517D22Rik	4921517D22Rik|-|-|13|13 B2|protein-coding	NM_183290	0	0.00275	0.0034	0	0	#DIV/0!	#DIV/0!	#DIV/0!	-0.142496	0.61	1	-0.296912	0.579	1	NA	1	1	0.016232	0.905	1	-1.12	0.727	1	1.51548	0.6292	1	0	0	0	0	0.011	0	0	0	0.017	0	0	0	0	0	0	0	0	0	0.027	0
	4921518K17Rik	4921518K17Rik|-|-|12|12 C1|ncRNA	NR_131110	0.00366667	0	0	0	#DIV/0!	#DIV/0!	#DIV/0!	#DIV/0!	0.103793	0.71	1	0.0372416	0.945	1	-1.08	0.759	1	NA	1	1	NA	1	1	NA	1	1	0.011	0	0	0	0	0	0	0	0	0	0	0	0	0	0	0	0	0	0	0
	4921524J17Rik	4921524J17Rik|-|-|8|8 C3|protein-coding	NR_033144	3.545	2.245	1.5968	1.354	0.51873	0.477558	0.526302	0.460858	0.417584	0.0595	0.161	0.804158	0.000256	0.000964	-1.21	4.81e-07	3.52e-06	-0.344854	0.0957	0.375	-0.775	0.000898	0.00613	0.391011	0.0904943	0.273972	4.062	3.321	3.252	2.39	2.568	1.565	2.457	1.763	1.14	1.908	1.255	1.918	1.177	0.935	2.185	1.236	1.312	1.279	6.834	4.701
	4921524L21Rik	4921524L21Rik|-|-|18|18 A1|protein-coding	NM_027598	0	0	0	0	#DIV/0!	#DIV/0!	#DIV/0!	#DIV/0!	NA	1	1	NA	1	1	NA	1	1	NA	1	1	NA	1	1	NA	1	1	0	0	0	0	0	0	0	0	0	0	0	0	0	0	0	0	0	0	0	0
	4921525O09Rik	4921525O09Rik|-|-|13|13 A5|ncRNA	NR_045061	0.004	0.002	0	0.001	#DIV/0!	#DIV/0!	#DIV/0!	#DIV/0!	0.0390342	0.889	1	0.0372416	0.945	1	-0.595	0.865	1	0.00913838	0.946	1	-0.102	0.975	1	0.335438	0.915169	1	0.012	0	0	0	0	0	0.008	0	0	0	0	0	0	0	0.006	0	0	0	0	0
	4921529L05Rik	4921529L05Rik|-|-|6|6 B3|ncRNA	NR_110484	0.0186667	0	0	0	0.333333	0	#DIV/0!	0	0.220041	0.452	1	0.220167	0.686	1	-2.21	0.517	1	NA	1	1	NA	1	1	NA	1	1	0.013	0.043	0	0	0	0	0	0	0	0	0	0	0	0	0	0	0	0	0.056	0.015
	4921530L21Rik	4921530L21Rik|-|-|14|14 E2.1|protein-coding	NM_025733	0.192667	0.648	0.3948	0.0601667	#DIV/0!	17.0526	3.87059	#DIV/0!	-1.55863	0.000199	0.00177	-1.14771	0.0262	0.0582	-1.54	0.107	0.197	-0.409659	0.202	0.552	-3.54	7.86e-08	1.81e-06	2.92323	4.58e-05	0.00132056	0.232	0.131	0.215	0.742	0.545	0.903	0.402	0.169	0.601	0.242	0.31	0.652	0	0.164	0.08	0.027	0.031	0.059	0	0.038
	4921531C22Rik	4921531C22Rik|-|-|2|2 H4|ncRNA	NR_033782	0.415333	0.375	0.9	0.696	0.639959	0.730994	0.867888	1.43802	-0.0246507	0.944	0.972	-1.3691	1.84e-05	8.67e-05	0.973	0.0127	0.034	1.15348	1.34e-05	0.000533	0.94	0.0089	0.0381	0.470438	0.147139	0.36529	0.381	0.508	0.357	0.245	0.396	0.387	0.472	0.667	0.616	0.801	1.017	1.399	0.866	1.013	0.659	0.518	0.6	0.52	0.649	0.513
	4921531P14Rik	4921531P14Rik|1700108N05Rik|-|18|18 E3|ncRNA	NR_045361	0	0	0	0	#DIV/0!	#DIV/0!	#DIV/0!	#DIV/0!	NA	1	1	NA	1	1	NA	1	1	NA	1	1	NA	1	1	NA	1	1	0	0	0	0	0	0	0	0	0	0	0	0	0	0	0	0	0	0	0	0
	4921533I20Rik	4921533I20Rik|-|-|18|18 A1|pseudo	NR_033607	0.0663333	0.16725	0.115	0.192833	0.194526	0.753378	3.96552	0.554119	-0.765063	0.153	0.315	-0.65187	0.374	0.51	1.68	0.0785	0.153	-0.180244	0.594	0.854	0.197	0.765	0.865	-0.637694	0.395891	0.635008	0.096	0	0.103	0.175	0.18	0.26	0.054	0	0.16	0.082	0.06	0.273	0.225	0	0.166	0.277	0.25	0.239	0.341	0.222
	4921534H16Rik	4921534H16Rik|-|-|9|9 E3.3|ncRNA	NR_110443	0	0	0.0054	0.00183333	#DIV/0!	#DIV/0!	#DIV/0!	#DIV/0!	NA	1	1	-0.410648	0.447	1	1.13	0.75	1	0.0971589	0.476	1	0.619	0.848	1	1.75931	0.536283	1	0	0	0	0	0	0	0	0	0	0.006	0.021	0	0	0	0	0.011	0	0	0	0
	4921536K21Rik	4921536K21Rik|AV043724|-|11|11 A1|protein-coding	NM_026150	0.412	0.56325	0.5944	0.333	0.842536	3.01203	4.79355	1.28077	-0.566229	0.0634	0.168	-0.755848	0.0373	0.0788	-0.127	0.74	0.826	0.143985	0.591	0.853	-0.752	0.0144	0.0546	0.94509	0.00655431	0.0484266	0.387	0.329	0.52	0.52	0.474	0.613	0.646	1.008	0.632	0.408	0.558	0.366	0.394	0.26	0.297	0.413	0.177	0.457	0.489	0.187
	4921539E11Rik	4921539E11Rik|-|-|4|4 C6|protein-coding	NM_001163494	0	0	0	0	#DIV/0!	#DIV/0!	0	#DIV/0!	NA	1	1	NA	1	1	NA	1	1	NA	1	1	NA	1	1	NA	1	1	0	0	0	0	0	0	0	0	0	0	0	0	0	0	0	0	0	0	0	0
	4922502D21Rik	4922502D21Rik|Clec2m|Gm1074|SPATA78|-|6|6 F3|protein-coding	NM_199034	0	0	0	0	#DIV/0!	#DIV/0!	#DIV/0!	#DIV/0!	NA	1	1	NA	1	1	NA	1	1	NA	1	1	NA	1	1	NA	1	1	0	0	0	0	0	0	0	0	0	0	0	0	0	0	0	0	0	0	0	0
	4922502H24Rik	4922502H24Rik|-|-|13|13 D1|ncRNA	NR_046187	0	0	0	0	#DIV/0!	#DIV/0!	#DIV/0!	#DIV/0!	NA	1	1	NA	1	1	NA	1	1	NA	1	1	NA	1	1	NA	1	1	0	0	0	0	0	0	0	0	0	0	0	0	0	0	0	0	0	0	0	0
	4922502N22Rik	4922502N22Rik|-|-|6|6 G1|ncRNA	NR_045149	0	0.02925	0	0	#DIV/0!	#DIV/0!	#DIV/0!	#DIV/0!	-0.445389	0.245	1	NA	1	1	NA	1	1	-0.116967	0.487	1	-2.65	0.293	1	NA	1	1	0	0	0	0	0.031	0.038	0.048	0	0	0	0	0	0	0	0	0	0	0	0	0
	4930401C15Rik	4930401C15Rik|-|-|10|10 A4|ncRNA	NR_045349	0	0	0	0	#DIV/0!	#DIV/0!	#DIV/0!	#DIV/0!	NA	1	1	NA	1	1	NA	1	1	NA	1	1	NA	1	1	NA	1	1	0	0	0	0	0	0	0	0	0	0	0	0	0	0	0	0	0	0	0	0
	4930401O10Rik	4930401O10Rik|-|-|11|11 B4|ncRNA	NR_045942	0	0	0	0	#DIV/0!	#DIV/0!	#DIV/0!	#DIV/0!	NA	1	1	NA	1	1	NA	1	1	NA	1	1	NA	1	1	NA	1	1	0	0	0	0	0	0	0	0	0	0	0	0	0	0	0	0	0	0	0	0
	4930401O12Rik	4930401O12Rik|-|-|13|13 A3.2|ncRNA	NR_045957	0	0	0	0	#DIV/0!	#DIV/0!	#DIV/0!	#DIV/0!	NA	1	1	NA	1	1	NA	1	1	NA	1	1	NA	1	1	NA	1	1	0	0	0	0	0	0	0	0	0	0	0	0	0	0	0	0	0	0	0	0
	4930402F06Rik	4930402F06Rik|-|-|2|2 B|protein-coding	NM_001080709	0.0146667	0	0	0.0181667	#DIV/0!	#DIV/0!	#DIV/0!	#DIV/0!	0.168451	0.548	1	0.153643	0.777	1	0.566	0.799	0.869	NA	1	1	2.46	0.414	1	-1.49659	0.629429	1	0.014	0	0.03	0	0	0	0	0	0	0	0	0	0.055	0	0.054	0	0	0	0	0
	4930402F11Rik	4930402F11Rik|-|-|7|7 C|ncRNA	NR_045940	0	0	0	0	#DIV/0!	#DIV/0!	#DIV/0!	#DIV/0!	NA	1	1	NA	1	1	NA	1	1	NA	1	1	NA	1	1	NA	1	1	0	0	0	0	0	0	0	0	0	0	0	0	0	0	0	0	0	0	0	0
	4930402H24Rik	4930402H24Rik|2810487F15Rik|AI413763|C78926|-|2 F1|2|protein-coding	NM_029432	20.7397	35.0392	31.7152	25.7245	1.0945	2.45752	2.27024	2.35594	-0.913991	0.00013	0.00126	-0.931156	4.66e-08	3.32e-07	0.482	0.0448	0.0973	-0.0169073	0.934	0.979	-0.486	0.0622	0.162	0.467203	0.0243635	0.117879	21.52	23.014	17.685	39.501	36.136	41.907	22.613	32.324	32.827	40.137	24.465	28.823	29.176	12.758	27.865	33.365	24.229	26.954	18.949	14.258
	4930402K13Rik	4930402K13Rik|-|-|X|X A1.1|protein-coding	NM_001270700	0	0	0	0	#DIV/0!	#DIV/0!	#DIV/0!	#DIV/0!	NA	1	1	NA	1	1	NA	1	1	NA	1	1	NA	1	1	NA	1	1	0	0	0	0	0	0	0	0	0	0	0	0	0	0	0	0	0	0	0	0
	4930404A05Rik	4930404A05Rik|-|-|16|16 B5|ncRNA	NR_040495	0	0	0	0	#DIV/0!	#DIV/0!	#DIV/0!	#DIV/0!	NA	1	1	NA	1	1	NA	1	1	NA	1	1	NA	1	1	NA	1	1	0	0	0	0	0	0	0	0	0	0	0	0	0	0	0	0	0	0	0	0
	4930404H11Rik	4930404H11Rik|-|-|12|12 C3|ncRNA	NR_045941	0	0.009	0.0714	0.0415	0	#DIV/0!	#DIV/0!	1.0375	-0.0897196	0.748	1	-0.902304	0.181	0.294	3.15	0.184	0.302	0.234074	0.252	1	1.92	0.32	1	1.11507	0.472694	1	0	0	0	0	0	0	0.036	0	0.279	0	0.078	0	0	0	0.024	0.04	0.14	0.045	0.111	0
	4930404I05Rik	4930404I05Rik|-|-|16|16 C3.3|ncRNA	NR_028368	0.0486667	0.0965	0.0658	0.0968333	0.139446	0.17674	0.136232	0.283969	-0.503096	0.344	0.537	-0.538176	0.471	0.602	1.14	0.329	0.466	-0.0668796	0.823	0.946	-0.0603	0.955	0.976	-0.197968	0.855282	0.933278	0.039	0.044	0.063	0.179	0.074	0.133	0	0	0.109	0.067	0.153	0	0	0.194	0.189	0.126	0.037	0.035	0.349	0.546
	4930404N11Rik	4930404N11Rik|2210409H10Rik|5730551K18Rik|AI854616|-|10|10 C1|protein-coding	NM_001014836	5.99033	3.64175	3.114	4.45067	0.587633	0.303454	0.307343	0.898943	0.494852	0.0993	0.231	0.579933	0.0173	0.0408	-0.282	0.306	0.442	-0.0519309	0.843	0.953	0.258	0.411	0.589	-0.317722	0.226097	0.465164	7.123	5.615	5.233	2.113	3.385	3.144	5.925	2.125	2.318	3.236	3.63	4.261	2.69	2.249	5.732	4.918	6.161	4.954	10.194	12.001
	4930405A10Rik	4930405A10Rik|4930456G20Rik|-|14|14 A3|ncRNA	NR_046307	0	0	0	0	#DIV/0!	#DIV/0!	#DIV/0!	#DIV/0!	NA	1	1	NA	1	1	NA	1	1	NA	1	1	NA	1	1	NA	1	1	0	0	0	0	0	0	0	0	0	0	0	0	0	0	0	0	0	0	0	0
	4930405A21Rik	4930405A21Rik|-|-|2|2 H1|ncRNA	NR_040505	0.0553333	0.0425	0.1954	0.131333	0.321705	0.379464	2.19551	1.44322	0.117257	0.823	0.902	-1.46254	0.0332	0.0714	1.33	0.264	0.398	0.775852	0.0183	0.137	1.63	0.153	0.304	0.788977	0.398296	0.636735	0.039	0.065	0.062	0.02	0.036	0.087	0.027	0.394	0.054	0.099	0.361	0.069	0	0	0.223	0.28	0.216	0.069	0.172	0.112
	4930405D11Rik	4930405D11Rik|-|-|11|11 D|ncRNA	NR_045956	0	0	0	0	#DIV/0!	#DIV/0!	#DIV/0!	#DIV/0!	NA	1	1	NA	1	1	NA	1	1	NA	1	1	NA	1	1	NA	1	1	0	0	0	0	0	0	0	0	0	0	0	0	0	0	0	0	0	0	0	0
	4930405J17Rik	4930405J17Rik|-|-|10|10 A3|ncRNA	NR_045350	0.0103333	0	0.0052	0.013	#DIV/0!	#DIV/0!	#DIV/0!	#DIV/0!	0.0334247	0.905	1	-0.158755	0.767	1	0.612	0.862	1	0.0614787	0.649	1	1.07	0.741	1	0.392675	0.900407	1	0.031	0	0	0	0	0	0	0	0	0.026	0	0	0	0	0.029	0.049	0	0	0	0
	4930405L22Rik	4930405L22Rik|-|-|5|5 B3|ncRNA	NR_110478	0	0	0	0.00983333	#DIV/0!	#DIV/0!	#DIV/0!	#DIV/0!	NA	1	1	NA	1	1	1.13	0.75	1	NA	1	1	0.619	0.848	1	0.335438	0.915169	1	0	0	0	0	0	0	0	0	0	0	0	0	0	0	0	0	0	0.059	0	0
	4930405O22Rik	4930405O22Rik|-|-|17 E1.1|17|ncRNA	NR_130176	0.035	0.0465	0.0034	0.0295	0.777778	0.989362	0.109677	#DIV/0!	-0.181921	0.71	1	0.280727	0.648	1	0.0936	0.965	0.977	-0.195882	0.344	1	-0.513	0.758	0.861	-1.27098	0.614615	1	0.04	0	0.065	0.102	0.038	0.046	0	0	0	0.017	0	0	0.138	0	0.039	0	0	0	0.045	0.047
	4930406D18Rik	4930406D18Rik|-|-|3|3 F2.2|ncRNA	NR_040543	0	0	0	0	#DIV/0!	#DIV/0!	#DIV/0!	#DIV/0!	NA	1	1	NA	1	1	NA	1	1	NA	1	1	NA	1	1	NA	1	1	0	0	0	0	0	0	0	0	0	0	0	0	0	0	0	0	0	0	0	0
	4930407G08Rik	4930407G08Rik|-|-|4|4 C7|ncRNA	NR_131071	0	0.02325	0.0048	0.0268333	#DIV/0!	0.726562	0.114286	#DIV/0!	-0.251728	0.428	1	-0.296912	0.579	1	2.59	0.46	1	-0.0310444	0.853	1	0.26	0.891	1	-0.630092	0.818764	1	0	0	0	0.028	0.026	0	0.039	0	0	0.024	0	0	0.081	0	0.08	0	0	0	0	0.032
	4930407I10Rik	4930407I10Rik|Gm747|-|15|15 E1|protein-coding	NM_001166475	0	0	0.0012	0	#DIV/0!	#DIV/0!	#DIV/0!	#DIV/0!	NA	1	1	-0.296912	0.579	1	NA	1	1	0.0614787	0.649	1	NA	1	1	1.51548	0.6292	1	0	0	0	0	0	0	0	0	0	0	0.006	0	0	0	0	0	0	0	0	0
	4930407I19Rik	4930407I19Rik|-|-|10|10 B5.1|ncRNA	NR_131070	0.014	0	0	0	#DIV/0!	#DIV/0!	#DIV/0!	#DIV/0!	0.103793	0.71	1	0.0372416	0.945	1	-1.08	0.759	1	NA	1	1	NA	1	1	NA	1	1	0.042	0	0	0	0	0	0	0	0	0	0	0	0	0	0	0	0	0	0	0
	4930412B13Rik	4930412B13Rik|-|-|2|2 E5|ncRNA	NR_040631	0	0	0	0	0	#DIV/0!	#DIV/0!	#DIV/0!	NA	1	1	NA	1	1	NA	1	1	NA	1	1	NA	1	1	NA	1	1	0	0	0	0	0	0	0	0	0	0	0	0	0	0	0	0	0	0	0.034	0
	4930412C18Rik	4930412C18Rik|5730591J02Rik|-|4|4 A1|ncRNA	NR_030693	0.837667	1.51125	0.9464	0.937167	2.22784	3.55588	2.55094	1.4923	-0.97218	0.000757	0.00534	-0.501776	0.0384	0.0808	0.382	0.271	0.405	-0.477076	0.0321	0.195	-0.676	0.0357	0.109	0.131715	0.630147	0.804965	0.669	1.111	0.733	1.738	2.05	1.049	1.208	0.861	0.712	1.129	1.014	1.016	1.516	0.858	1.005	0.676	0.819	0.749	0.376	0.425
	4930412O13Rik	4930412O13Rik|ENSMUSG00000075535|Gm10853|-|2|2 A1|ncRNA	NR_024257	0	0	0	0	#DIV/0!	#DIV/0!	#DIV/0!	#DIV/0!	NA	1	1	NA	1	1	NA	1	1	NA	1	1	NA	1	1	NA	1	1	0	0	0	0	0	0	0	0	0	0	0	0	0	0	0	0	0	0	0	0
	4930413E15Rik	4930413E15Rik|-|-|5|5 F|ncRNA	NR_040694	0	0	0	0	#DIV/0!	#DIV/0!	#DIV/0!	#DIV/0!	NA	1	1	NA	1	1	NA	1	1	NA	1	1	NA	1	1	NA	1	1	0	0	0	0	0	0	0	0	0	0	0	0	0	0	0	0	0	0	0	0
	4930413F20Rik	4930413F20Rik|-|-|15|15 B3.1|ncRNA	NR_045883	0.0876667	0.03725	0.0924	0.0515	0.449573	0.459877	1.71111	0.310241	0.49524	0.353	0.545	-0.172686	0.804	0.873	-0.701	0.553	0.678	0.386797	0.216	0.568	0.419	0.736	0.845	0.989044	0.341387	0.585942	0.07	0.118	0.075	0.018	0.016	0.04	0.075	0.089	0.098	0.06	0.027	0.188	0	0	0.034	0.113	0.131	0.031	0.195	0.081
	4930413G21Rik	4930413G21Rik|-|-|7|7 F2|ncRNA	NR_045614	0.852	1.485	1.8244	1.89283	0.20466	0.481205	0.476718	0.754117	-0.865016	0.00898	0.0381	-1.34117	5.1e-05	0.00022	1.36	3.59e-05	0.00019	0.350271	0.215	0.566	0.385	0.24	0.41	0.0625148	0.839845	0.924703	0.94	0.69	0.926	0.887	1.357	1.268	2.428	1.254	1.444	1.159	2.487	2.778	2.459	1.915	1.581	1.473	2.419	1.51	4.163	3.086
	4930413M19Rik	4930413M19Rik|-|-|14 C1|14|ncRNA	NR_045759	0	0	0	0	#DIV/0!	#DIV/0!	#DIV/0!	#DIV/0!	NA	1	1	NA	1	1	NA	1	1	NA	1	1	NA	1	1	NA	1	1	0	0	0	0	0	0	0	0	0	0	0	0	0	0	0	0	0	0	0	0
	4930414N06Rik	4930414N06Rik|-|-|19|19 C3|ncRNA	NR_040294	0.511333	0.3705	0.3736	0.399167	0.177855	0.349858	0.452848	1.33949	0.193643	0.715	0.837	0.152653	0.818	0.883	-0.235	0.757	0.84	0.0593837	0.862	0.958	0.114	0.851	0.918	0.00329877	0.99558	0.998625	0.786	0.035	0.713	0.064	0.443	0.571	0.404	0.161	0.351	0.162	0.294	0.9	0.154	0.311	0.334	0.558	0.588	0.45	2.875	1.059
	4930415F15Rik	4930415F15Rik|-|-|11|11 A1|protein-coding	NM_028669	0.0183333	0.04575	0	0.0156667	#DIV/0!	0.170709	0	0.783333	-0.581403	0.245	0.43	0.0567759	0.923	1	-0.219	0.919	1	-0.298421	0.193	1	-2.27	0.127	0.267	-0.133317	0.955901	1	0	0	0.055	0	0	0	0.183	0	0	0	0	0	0	0	0	0	0.048	0.046	0	0.268
	4930415L06Rik	4930415L06Rik|Ppp4r3cp|Smek3p|-|X|X C1|protein-coding	NM_001033880	0	0	0	0	#DIV/0!	#DIV/0!	#DIV/0!	#DIV/0!	NA	1	1	NA	1	1	NA	1	1	NA	1	1	NA	1	1	NA	1	1	0	0	0	0	0	0	0	0	0	0	0	0	0	0	0	0	0	0	0	0
	4930415O20Rik	4930415O20Rik|-|-|15|15 F1|protein-coding	NM_001201322	0.16	0.081	0.0234	0.053	1.05263	0.680672	0.148101	#DIV/0!	0.272884	0.602	0.758	0.707894	0.335	0.471	-1.5	0.308	0.443	-0.117449	0.578	1	-0.784	0.596	0.743	-0.254173	0.905359	1	0.136	0.307	0.037	0.035	0.192	0	0.097	0	0	0.117	0	0	0	0	0.066	0	0.191	0.061	0.152	0.119
	4930417O13Rik	4930417O13Rik|-|-|6|6 F2-F3|ncRNA	NR_015527	0	0	0	0	0	#DIV/0!	#DIV/0!	#DIV/0!	NA	1	1	NA	1	1	NA	1	1	NA	1	1	NA	1	1	NA	1	1	0	0	0	0	0	0	0	0	0	0	0	0	0	0	0	0	0	0	0.039	0
	4930417O22Rik	4930417O22Rik|-|-|11|11 D|ncRNA	NR_045806	0	0	0.0116	0	#DIV/0!	#DIV/0!	0.464	0	NA	1	1	-0.296912	0.579	1	NA	1	1	0.0614787	0.649	1	NA	1	1	1.51548	0.6292	1	0	0	0	0	0	0	0	0	0	0	0	0.058	0	0	0	0	0	0	0	0
	4930419G24Rik	4930419G24Rik|-|-|3|3 A3|ncRNA	NR_040595	0	0.0195	0.0316	0.044	#DIV/0!	0.153543	0.282143	0.382609	-0.195457	0.485	1	-0.668216	0.286	0.419	3.7	0.0825	0.16	0.0893798	0.636	1	1.12	0.513	0.677	0.0388277	0.979374	1	0	0	0	0	0	0	0.078	0	0	0.016	0.142	0	0	0	0.07	0.059	0.102	0.033	0	0.127
	4930423M02Rik	4930423M02Rik|-|-|4|4 A1|ncRNA	NR_038183	0	0	0	0	#DIV/0!	#DIV/0!	#DIV/0!	#DIV/0!	NA	1	1	NA	1	1	NA	1	1	NA	1	1	NA	1	1	NA	1	1	0	0	0	0	0	0	0	0	0	0	0	0	0	0	0	0	0	0	0	0
	4930425K10Rik	4930425K10Rik|-|-|5|5 C3.1|ncRNA	NR_038182	0	0	0	0.008	0	#DIV/0!	#DIV/0!	#DIV/0!	NA	1	1	NA	1	1	1.13	0.75	1	NA	1	1	0.619	0.848	1	0.335438	0.915169	1	0	0	0	0	0	0	0	0	0	0	0	0	0	0	0	0	0.048	0	0.058	0
	4930425L21Rik	4930425L21Rik|4930473P14Rik|-|6|6 G1|ncRNA	NR_126088	0	0	0	0.025	#DIV/0!	#DIV/0!	#DIV/0!	1.47059	NA	1	1	NA	1	1	2.76	0.416	1	NA	1	1	2.25	0.473	1	-1.289	0.678621	1	0	0	0	0	0	0	0	0	0	0	0	0	0.065	0	0.085	0	0	0	0	0
	4930425O10Rik	4930425O10Rik|-|-|3|3 H1|ncRNA	NR_040545	0	0	0	0	#DIV/0!	#DIV/0!	#DIV/0!	#DIV/0!	NA	1	1	NA	1	1	NA	1	1	NA	1	1	NA	1	1	NA	1	1	0	0	0	0	0	0	0	0	0	0	0	0	0	0	0	0	0	0	0	0
	4930426D05Rik	4930426D05Rik|-|-|18|18 A2|protein-coding	NM_001271580	0.0296667	0.02775	0.0254	0.0055	0.0938819	0.0722656	0.0819355	0.0327381	-0.0106516	0.982	0.991	0.0361613	0.959	0.975	-2.15	0.338	0.476	-0.0121877	0.951	1	-2.18	0.269	1	2.07816	0.388383	1	0.012	0	0.077	0	0.044	0	0.067	0	0	0	0	0.127	0	0	0.011	0	0.022	0	0.316	0.384
	4930426L09Rik	4930426L09Rik|-|-|2|2 A3|ncRNA	NR_024323	0.244	0.1635	0.2054	0.183833	0.774603	0.729911	0.738849	0.430523	0.249014	0.623	0.774	0.0399224	0.943	0.966	-0.2	0.746	0.831	0.161614	0.637	0.874	0.164	0.813	0.895	0.166017	0.786347	0.895832	0.347	0.246	0.139	0.065	0.193	0.029	0.367	0.263	0.072	0.132	0.1	0.46	0.252	0.025	0.298	0.104	0.24	0.184	0.315	0.224
	4930427A07Rik	4930427A07Rik|AA536649|mFLJ00116|-|12|12 F1|protein-coding	NM_134041	1.73133	1.02125	0.5442	0.6125	1.27117	1.42633	2.80515	1.8617	0.537865	0.0491	0.14	1.35232	2.41e-09	2.04e-08	-1.27	0.00139	0.00502	-0.672682	0.00635	0.0661	-0.698	0.0715	0.179	-0.0844115	0.807801	0.90766	1.827	1.581	1.786	1.039	0.601	1.127	1.318	0.671	0.462	0.446	0.57	0.572	0.504	1.186	0.447	0.525	0.544	0.469	1.362	0.716
	4930428D20Rik	4930428D20Rik|-|-|16|16 C2|ncRNA	NR_130991	0	0	0	0	#DIV/0!	#DIV/0!	#DIV/0!	#DIV/0!	NA	1	1	NA	1	1	NA	1	1	NA	1	1	NA	1	1	NA	1	1	0	0	0	0	0	0	0	0	0	0	0	0	0	0	0	0	0	0	0	0
	4930428E07Rik	4930428E07Rik|-|-|12|12 A3|ncRNA	NR_045943	0	0.015	0	0	#DIV/0!	#DIV/0!	#DIV/0!	#DIV/0!	-0.142496	0.61	1	NA	1	1	NA	1	1	-0.0216425	0.873	1	-1.47	0.645	1	NA	1	1	0	0	0	0	0	0	0.06	0	0	0	0	0	0	0	0	0	0	0	0	0
	4930428G15Rik	4930428G15Rik|-|-|9|9 F3|ncRNA	NR_040730	0	0	0	0.0136667	#DIV/0!	0	0	#DIV/0!	NA	1	1	NA	1	1	1.66	0.638	1	NA	1	1	1.15	0.72	1	-0.199571	0.949398	1	0	0	0	0	0	0	0	0	0	0	0	0	0	0	0	0.038	0.044	0	0	0.055
	4930428O21Rik	4930428O21Rik|-|-|5|5 F|ncRNA	NR_045871	0	0	0	0	#DIV/0!	#DIV/0!	#DIV/0!	#DIV/0!	NA	1	1	NA	1	1	NA	1	1	NA	1	1	NA	1	1	NA	1	1	0	0	0	0	0	0	0	0	0	0	0	0	0	0	0	0	0	0	0	0
	4930429B21Rik	4930429B21Rik|-|-|3|3 A3|ncRNA	NR_027966	2.30167	2.05675	1.2616	1.4535	0.446579	0.240134	0.186324	0.565344	-0.0151601	0.96	0.98	0.522595	0.0268	0.0593	-0.478	0.033	0.0759	-0.459539	0.0721	0.318	-0.492	0.0782	0.191	-0.0543733	0.801173	0.903943	2.763	2.239	1.903	0.986	2.458	1.934	2.849	1.052	0.902	1.186	1.451	1.717	1.181	1.532	1.704	1.138	1.537	1.629	5.154	8.565
	4930429D17Rik	4930429D17Rik|-|-|5|5 E5|ncRNA	NR_040699	0	0	0	0	#DIV/0!	#DIV/0!	#DIV/0!	#DIV/0!	NA	1	1	NA	1	1	NA	1	1	NA	1	1	NA	1	1	NA	1	1	0	0	0	0	0	0	0	0	0	0	0	0	0	0	0	0	0	0	0	0
	4930429F11Rik	4930429F11Rik|-|-|17|17 E3|ncRNA	NR_033463	0	0	0	0	#DIV/0!	#DIV/0!	#DIV/0!	#DIV/0!	NA	1	1	NA	1	1	NA	1	1	NA	1	1	NA	1	1	NA	1	1	0	0	0	0	0	0	0	0	0	0	0	0	0	0	0	0	0	0	0	0
	4930429F24Rik	4930429F24Rik|-|-|9|9 E1|ncRNA	NR_040734	0.367667	0.175	0.0658	0.0383333	0.354207	0.210084	0.147204	1.91667	0.686578	0.128	0.277	1.75319	0.00365	0.0105	-3.13	0.000484	0.00197	-0.565215	0.0979	0.38	-2.25	0.0114	0.0459	0.981998	0.370739	0.612751	0.504	0.368	0.231	0.128	0.106	0.143	0.323	0.064	0.035	0.022	0.118	0.09	0	0	0.061	0.102	0	0.067	1.038	0.833
	4930430A15Rik	4930430A15Rik|-|-|2|2 E3|protein-coding	NM_026248	0	0	0	0	#DIV/0!	#DIV/0!	#DIV/0!	#DIV/0!	NA	1	1	NA	1	1	NA	1	1	NA	1	1	NA	1	1	NA	1	1	0	0	0	0	0	0	0	0	0	0	0	0	0	0	0	0	0	0	0	0
	4930430F08Rik	4930430F08Rik|4930571E09Rik|A730088G13Rik|AW551239|C430008C19Rik|-|10|10 D1|protein-coding	NM_175128	6.23267	8.26875	5.296	3.896	1.16455	1.57981	1.34553	1.06681	-0.577448	0.0233	0.0798	-0.0909614	0.653	0.759	-0.489	0.0967	0.182	-0.454888	0.0456	0.241	-1.11	0.000328	0.00268	0.586726	0.0248473	0.119264	6.664	6.323	5.711	10.151	9.639	8.215	5.07	5.224	5.479	7.014	3.521	5.242	5.927	1.898	4.457	3.655	3.7	3.739	5.352	5.234
	4930430F21Rik	4930430F21Rik|-|-|15|15 B2|ncRNA	NR_045186	0	0.02825	0	0.0233333	#DIV/0!	#DIV/0!	#DIV/0!	#DIV/0!	-0.261925	0.402	1	NA	1	1	2.74	0.434	1	-0.0562289	0.681	1	-0.00428	0.999	1	-1.26794	0.683664	1	0	0	0	0	0.045	0	0.068	0	0	0	0	0	0.14	0	0	0	0	0	0	0
	4930430J02Rik	4930430J02Rik|-|-|9|9 B|ncRNA	NR_040729	0	0	0.0306	0	#DIV/0!	0	#DIV/0!	#DIV/0!	NA	1	1	-0.296912	0.579	1	NA	1	1	0.0614787	0.649	1	NA	1	1	1.51548	0.6292	1	0	0	0	0	0	0	0	0	0	0	0	0.153	0	0	0	0	0	0	0	0.149
	4930431F12Rik	4930431F12Rik|-|-|5|5 B3|ncRNA	NR_073013	0	0	0	0	#DIV/0!	#DIV/0!	#DIV/0!	#DIV/0!	NA	1	1	NA	1	1	NA	1	1	NA	1	1	NA	1	1	NA	1	1	0	0	0	0	0	0	0	0	0	0	0	0	0	0	0	0	0	0	0	0
	4930431P03Rik	4930431P03Rik|-|-|14|14 C1|ncRNA	NR_045059	0	0	0	0	0	#DIV/0!	#DIV/0!	0	NA	1	1	NA	1	1	NA	1	1	NA	1	1	NA	1	1	NA	1	1	0	0	0	0	0	0	0	0	0	0	0	0	0	0	0	0	0	0	0.019	0
	4930432J09Rik	4930432J09Rik|-|-|14|14 E2.3|ncRNA	NR_045953	0.0126667	0.0065	0.014	0.0055	#DIV/0!	#DIV/0!	#DIV/0!	#DIV/0!	0.163978	0.71	1	-0.0357018	0.962	0.977	-1.17	0.592	0.712	0.0903326	0.69	1	-0.406	0.853	1	1.35801	0.465795	1	0.018	0	0.02	0	0.017	0	0.009	0.031	0.017	0	0	0.022	0	0	0	0.01	0.023	0	0	0
	4930432K21Rik	4930432K21Rik|-|-|8|8 C2|protein-coding	NM_001163752	0.876333	0.632	0.3918	0.901167	0.790201	1.0604	0.486708	0.639579	0.273473	0.387	0.58	0.780279	0.0181	0.0423	0.225	0.564	0.689	-0.431625	0.0934	0.37	0.526	0.128	0.269	-1.03833	0.00217897	0.0224895	1.124	0.985	0.52	0.645	0.845	0.455	0.583	0.246	0.537	0.379	0.338	0.459	0.535	1.049	1.583	0.751	0.915	0.574	1.109	0.596
	4930432M17Rik	4930432M17Rik|-|-|3|3 G1|protein-coding	NM_001033814	0	0.004	0	0	#DIV/0!	#DIV/0!	#DIV/0!	#DIV/0!	-0.0897196	0.748	1	NA	1	1	NA	1	1	0.00913838	0.946	1	-0.583	0.857	1	NA	1	1	0	0	0	0	0.016	0	0	0	0	0	0	0	0	0	0	0	0	0	0	0
	4930433B08Rik	4930433B08Rik|-|-|3|3 A1|ncRNA	NR_040544	0	0	0	0	#DIV/0!	#DIV/0!	#DIV/0!	#DIV/0!	NA	1	1	NA	1	1	NA	1	1	NA	1	1	NA	1	1	NA	1	1	0	0	0	0	0	0	0	0	0	0	0	0	0	0	0	0	0	0	0	0
	4930433I11Rik	4930433I11Rik|Gm481|-|7|7 B3|protein-coding	NM_207248	0	0	0	0	#DIV/0!	#DIV/0!	#DIV/0!	#DIV/0!	NA	1	1	NA	1	1	NA	1	1	NA	1	1	NA	1	1	NA	1	1	0	0	0	0	0	0	0	0	0	0	0	0	0	0	0	0	0	0	0	0
	4930433N12Rik	4930433N12Rik|-|-|9|9 A1|ncRNA	NR_027988	0	0	0	0	#DIV/0!	#DIV/0!	#DIV/0!	#DIV/0!	NA	1	1	NA	1	1	NA	1	1	NA	1	1	NA	1	1	NA	1	1	0	0	0	0	0	0	0	0	0	0	0	0	0	0	0	0	0	0	0	0
	4930434J06Rik	4930434J06Rik|-|-|14|14 D2|ncRNA	NR_046274	0	0	0	0	#DIV/0!	#DIV/0!	#DIV/0!	#DIV/0!	NA	1	1	NA	1	1	NA	1	1	NA	1	1	NA	1	1	NA	1	1	0	0	0	0	0	0	0	0	0	0	0	0	0	0	0	0	0	0	0	0
	4930435E12Rik	4930435E12Rik|TSCPA|-|16|16 B4|protein-coding	NM_029042	0	0	0	0	#DIV/0!	#DIV/0!	#DIV/0!	#DIV/0!	NA	1	1	NA	1	1	NA	1	1	NA	1	1	NA	1	1	NA	1	1	0	0	0	0	0	0	0	0	0	0	0	0	0	0	0	0	0	0	0	0
	4930438E09Rik	4930438E09Rik|-|-|14|14 D1|ncRNA	NR_045961	0	0	0	0	#DIV/0!	0	#DIV/0!	#DIV/0!	NA	1	1	NA	1	1	NA	1	1	NA	1	1	NA	1	1	NA	1	1	0	0	0	0	0	0	0	0	0	0	0	0	0	0	0	0	0	0	0	0.029
	4930440C22Rik	4930440C22Rik|-|-|1|1 D|ncRNA	NR_040473	0	0	0	0	#DIV/0!	#DIV/0!	#DIV/0!	0	NA	1	1	NA	1	1	NA	1	1	NA	1	1	NA	1	1	NA	1	1	0	0	0	0	0	0	0	0	0	0	0	0	0	0	0	0	0	0	0	0
	4930440I19Rik	4930440I19Rik|-|-|2|2 C3|ncRNA	NR_108098	0.0263333	0.034	0	0	#DIV/0!	1.54545	#DIV/0!	#DIV/0!	-0.123554	0.779	1	0.227752	0.676	1	-2.25	0.508	1	-0.0984221	0.505	1	-2.85	0.34	1	NA	1	1	0.019	0	0.06	0.094	0	0.042	0	0	0	0	0	0	0	0	0	0	0	0	0	0.022
	4930441H08Rik	4930441H08Rik|-|-|7|7 D1|ncRNA	NR_130995	0	0	0	0	#DIV/0!	#DIV/0!	#DIV/0!	#DIV/0!	NA	1	1	NA	1	1	NA	1	1	NA	1	1	NA	1	1	NA	1	1	0	0	0	0	0	0	0	0	0	0	0	0	0	0	0	0	0	0	0	0
	4930441J16Rik	4930441J16Rik|Astx1a|Astx1b|Astx1c|-|2|2 C3|ncRNA	NR_040501	0	0	0	0	#DIV/0!	#DIV/0!	#DIV/0!	#DIV/0!	NA	1	1	NA	1	1	NA	1	1	NA	1	1	NA	1	1	NA	1	1	0	0	0	0	0	0	0	0	0	0	0	0	0	0	0	0	0	0	0	0
	4930442J19Rik	4930442J19Rik|1700029E19Rik|Gm14152|OTTMUSG00000015807|-|2 G3|2|ncRNA	NR_040747	0	0	0	0	#DIV/0!	#DIV/0!	#DIV/0!	#DIV/0!	NA	1	1	NA	1	1	NA	1	1	NA	1	1	NA	1	1	NA	1	1	0	0	0	0	0	0	0	0	0	0	0	0	0	0	0	0	0	0	0	0
	4930442L01Rik	4930442L01Rik|-|-|3|3 F2.1|ncRNA	NR_015596	0	0	0	0	#DIV/0!	0	#DIV/0!	#DIV/0!	NA	1	1	NA	1	1	NA	1	1	NA	1	1	NA	1	1	NA	1	1	0	0	0	0	0	0	0	0	0	0	0	0	0	0	0	0	0	0	0	0.011
	4930443O20Rik	4930443O20Rik|-|-|2|2 D|ncRNA	NR_040504	0	0	0	0.00416667	0	0	#DIV/0!	#DIV/0!	NA	1	1	NA	1	1	1.13	0.75	1	NA	1	1	0.619	0.848	1	0.335438	0.915169	1	0	0	0	0	0	0	0	0	0	0	0	0	0	0	0	0	0.025	0	0.03	0.015
	4930444F02Rik	4930444F02Rik|1700010L24Rik|mpiR|-|10|10 A3|ncRNA	NR_102728	0	0	0	0.00283333	0	0	0	#DIV/0!	-0.0193514	0.945	1	-0.148073	0.783	1	1.13	0.75	1	0.032221	0.812	1	0.619	0.848	1	1.51548	0.6292	1	0	0	0	0	0	0	0	0	0	0	0	0	0	0	0	0.017	0	0	0.142	0.062
	4930444G20Rik	4930444G20Rik|-|-|10|10 A3|protein-coding	NM_053264	0	0	0	0	#DIV/0!	#DIV/0!	#DIV/0!	#DIV/0!	NA	1	1	NA	1	1	NA	1	1	NA	1	1	NA	1	1	NA	1	1	0	0	0	0	0	0	0	0	0	0	0	0	0	0	0	0	0	0	0	0
	4930444M15Rik	4930444M15Rik|-|-|14|14 D3|ncRNA	NR_045660	0.0193333	0.01225	0.0082	0.00366667	0.125541	0.453704	0.455556	#DIV/0!	0.084423	0.843	1	0.221602	0.733	0.823	-1.57	0.59	1	-0.0330083	0.847	1	-1.12	0.684	1	0.644617	0.837129	1	0.046	0	0.012	0	0.033	0	0.016	0	0	0	0	0.041	0	0	0.022	0	0	0	0.154	0.027
	4930444P10Rik	4930444P10Rik|-|-|1|1 A3|protein-coding	NM_001243238	0.262333	0.057	0.0546	0.0226667	0.19754	0.111111	0.23038	0.0784314	1.05278	0.0495	0.14	1.61421	0.0198	0.0456	-1.63	0.189	0.309	-0.038591	0.885	1	0.487	0.761	0.863	-0.656316	0.637088	0.810032	0.346	0.151	0.29	0	0.036	0	0.192	0.098	0	0.016	0.09	0.069	0	0	0.074	0.062	0	0	1.328	0.513
	4930445N18Rik	4930445N18Rik|3010027C24Rik|-|18|18 E3|ncRNA	NR_125720	0	0.0265	0.0602	0.0818333	0	1.06	#DIV/0!	#DIV/0!	-0.274851	0.388	1	-1.40675	0.055	0.11	4.65	0.0466	0.101	0.25204	0.345	1	1.76	0.304	0.483	-0.350604	0.798795	0.902761	0	0	0	0.044	0	0	0.062	0	0.06	0.13	0.034	0.077	0.17	0.3	0.021	0	0	0	0.048	0.025
	4930447A16Rik	4930447A16Rik|-|-|15|15 B3.1|protein-coding	NM_029113	0.011	0.0235	0.0338	0	#DIV/0!	#DIV/0!	#DIV/0!	#DIV/0!	-0.080283	0.777	1	-0.346729	0.575	1	-0.315	0.929	1	0.0414568	0.807	1	-1.47	0.645	1	2.15143	0.491208	1	0.033	0	0	0	0	0	0.094	0	0	0	0.051	0.118	0	0	0	0	0	0	0	0
	4930447C04Rik	4930447C04Rik|4921504I02Rik|A930035O15Rik|Six6OS|Six6as|Six6os1|-|12|12 C3|protein-coding	NM_029444	0.0206667	0.08525	0.0582	0.0215	0.05396	0.202014	0.219623	0.5375	-0.992523	0.064	0.169	-0.746226	0.321	0.457	0.341	0.868	0.915	-0.109025	0.714	0.906	-1.96	0.121	0.259	1.43778	0.421283	0.65601	0.04	0	0.022	0.072	0.019	0.092	0.158	0	0	0	0.11	0.181	0	0.1	0.029	0	0	0	0.383	0.422
	4930447F24Rik	4930447F24Rik|-|-|9|9 F1|ncRNA	NR_126078	0.0233333	0.02225	0.0522	0.0593333	0.614035	0.377119	0.398473	0.885572	-0.202563	0.64	1	-0.734859	0.318	0.454	2.23	0.137	0.241	0.178041	0.491	1	1.26	0.281	0.458	-0.134343	0.907458	0.960384	0.051	0.019	0	0	0.016	0	0.073	0	0	0.015	0.185	0.061	0	0.101	0.066	0	0.159	0.03	0.038	0.059
	4930447J18Rik	4930447J18Rik|4930425M13Rik|-|14|14 C1|ncRNA	NR_045959	0	0	0	0	#DIV/0!	#DIV/0!	#DIV/0!	#DIV/0!	NA	1	1	NA	1	1	NA	1	1	NA	1	1	NA	1	1	NA	1	1	0	0	0	0	0	0	0	0	0	0	0	0	0	0	0	0	0	0	0	0
	4930447K03Rik	4930447K03Rik|-|-|13|13 A3.3|ncRNA	NR_046184	0.171333	0.2135	0.2808	0.4095	0.69086	0.900844	1.96364	2.14398	-0.331371	0.513	0.689	-0.802895	0.147	0.248	1.48	0.0116	0.0316	0.24534	0.475	0.788	0.975	0.0942	0.218	-0.515055	0.324894	0.571794	0.167	0.167	0.18	0.094	0.401	0.253	0.106	0.475	0.104	0.319	0.174	0.332	0.51	0.625	0.485	0.3	0.139	0.398	0.248	0.237
	4930447M23Rik	4930447M23Rik|-|-|2|2 A3|ncRNA	NR_126563	0.578667	0.41325	0.6218	1.05867	0.344855	0.177589	0.159969	0.227036	0.262399	0.524	0.697	-0.387369	0.273	0.406	1.05	0.0129	0.0345	0.518809	0.0996	0.384	1.36	0.0028	0.0155	-0.618686	0.0944644	0.281653	0.556	0.792	0.388	0.133	0.354	0.408	0.758	0.502	0.821	0.372	0.536	0.878	0.377	1.231	1.597	0.686	1.467	0.994	1.678	2.327
	4930447N08Rik	4930447N08Rik|-|-|3 G1|3|ncRNA	NR_045168	0.028	0.01175	0.0274	0.00266667	0.0840841	0.122396	0.268627	0.205128	0.154587	0.684	1	-0.136401	0.849	0.905	-1.96	0.513	1	0.104435	0.57	1	-0.992	0.756	1	2.37108	0.343611	1	0.066	0	0.018	0	0	0	0.047	0	0	0	0.078	0.059	0	0	0.016	0	0	0	0.333	0.096
	4930448C13Rik	4930448C13Rik|-|-|12|12 A1.1|ncRNA	NR_045960	0	0	0	0	#DIV/0!	#DIV/0!	#DIV/0!	#DIV/0!	NA	1	1	NA	1	1	NA	1	1	NA	1	1	NA	1	1	NA	1	1	0	0	0	0	0	0	0	0	0	0	0	0	0	0	0	0	0	0	0	0
	4930448F12Rik	4930448F12Rik|-|-|13|13 A2|ncRNA	NR_046032	0	0	0	0	#DIV/0!	#DIV/0!	#DIV/0!	#DIV/0!	NA	1	1	NA	1	1	NA	1	1	NA	1	1	NA	1	1	NA	1	1	0	0	0	0	0	0	0	0	0	0	0	0	0	0	0	0	0	0	0	0
	4930448H16Rik	4930448H16Rik|-|-|5|5 G2|ncRNA	NR_040700	0.036	0	0.0054	0	#DIV/0!	#DIV/0!	#DIV/0!	#DIV/0!	0.170335	0.544	1	0.0858976	0.875	1	-1.84	0.592	1	0.0614787	0.649	1	NA	1	1	1.31974	0.674376	1	0	0.108	0	0	0	0	0	0	0	0.027	0	0	0	0	0	0	0	0	0	0
	4930448I06Rik	4930448I06Rik|-|-|1|1 B|ncRNA	NR_040475	0	0.00775	0	0	#DIV/0!	#DIV/0!	#DIV/0!	#DIV/0!	-0.0897196	0.748	1	NA	1	1	NA	1	1	0.00913838	0.946	1	-0.583	0.857	1	NA	1	1	0	0	0	0	0.031	0	0	0	0	0	0	0	0	0	0	0	0	0	0	0
	4930448I18Rik	4930448I18Rik|-|-|5|5 B3|ncRNA	NR_040696	0	0	0	0	#DIV/0!	0	#DIV/0!	#DIV/0!	NA	1	1	NA	1	1	NA	1	1	NA	1	1	NA	1	1	NA	1	1	0	0	0	0	0	0	0	0	0	0	0	0	0	0	0	0	0	0	0	0.03
	4930448K20Rik	4930448K20Rik|1700009K09Rik|-|4|4 A1|pseudo	NR_004448	0.0236667	0.043	0.083	0.0838333	#DIV/0!	0.462366	0.805825	1.33069	-0.265757	0.596	0.754	-1.32872	0.0645	0.125	1.98	0.0694	0.139	0.355974	0.255	0.612	1.18	0.249	0.42	0.12661	0.872152	0.941774	0.013	0.015	0.043	0	0.013	0.121	0.038	0.136	0.037	0.069	0.125	0.048	0.026	0.158	0.155	0.065	0.075	0.024	0	0.093
	4930449E01Rik	4930449E01Rik|-|-|14|14 E2.3|ncRNA	NR_045921	0.046	0.0115	0.01	0	#DIV/0!	#DIV/0!	#DIV/0!	0	0.165621	0.607	1	0.130799	0.814	1	-2.31	0.497	1	0.0314126	0.817	1	-0.583	0.857	1	1.51548	0.6292	1	0	0	0.138	0	0	0	0.046	0	0	0	0.05	0	0	0	0	0	0	0	0	0
	4930449E18Rik	4930449E18Rik|-|-|19|19 D2|ncRNA	NR_045319	0	0	0.0254	0.008	#DIV/0!	#DIV/0!	#DIV/0!	#DIV/0!	NA	1	1	-0.399094	0.457	1	1.13	0.75	1	0.0893704	0.511	1	0.619	0.848	1	1.42389	0.649297	1	0	0	0	0	0	0	0	0	0	0.127	0	0	0	0	0.048	0	0	0	0	0
	4930449I24Rik	4930449I24Rik|-|-|5|5 G3|protein-coding	NM_026136	0	0	0	0	#DIV/0!	#DIV/0!	#DIV/0!	#DIV/0!	NA	1	1	NA	1	1	NA	1	1	NA	1	1	NA	1	1	NA	1	1	0	0	0	0	0	0	0	0	0	0	0	0	0	0	0	0	0	0	0	0
	4930451G09Rik	4930451G09Rik|-|-|16 A1|16 2.49 cM|protein-coding	NM_001271586	0.415	0.35675	0.3816	0.362333	0.601449	0.362183	0.527072	0.766032	-0.0235031	0.94	0.97	-0.0977185	0.795	0.867	-0.0364	0.92	0.949	0.0609295	0.832	0.948	-0.0686	0.832	0.907	0.144257	0.694273	0.842707	0.479	0.292	0.474	0.254	0.384	0.362	0.427	0.255	0.195	0.206	0.467	0.785	0.264	0.573	0.405	0.386	0.261	0.285	0.69	0.985
	4930451I11Rik	4930451I11Rik|-|-|7|7 F3|protein-coding	NM_183131	0	0.03975	0.1538	0.371	#DIV/0!	#DIV/0!	0.407958	1.64889	-0.239457	0.427	1	-1.35556	0.0629	0.123	5.88	0.000981	0.00368	0.293329	0.26	1	3.15	0.0208	0.0726	-1.35649	0.254063	0.497659	0	0	0	0.083	0.076	0	0	0	0.227	0.105	0	0.437	0.279	1.531	0.118	0	0.152	0.146	0	0
	4930452A19Rik	4930452A19Rik|4933424P20Rik|-|17|17 A1|ncRNA	NR_045433	0	0.0115	0	0	#DIV/0!	#DIV/0!	#DIV/0!	#DIV/0!	-0.0897196	0.748	1	NA	1	1	NA	1	1	0.00913838	0.946	1	-0.583	0.857	1	NA	1	1	0	0	0	0	0	0	0.046	0	0	0	0	0	0	0	0	0	0	0	0	0
	4930452B06Rik	4930452B06Rik|4933406L09Rik|AI854000|-|14|14 A1|protein-coding	NM_028934	2.62133	1.29275	0.7346	0.9385	0.527537	0.279091	0.212989	0.266317	0.777343	0.00227	0.0129	1.49055	1.62e-09	1.41e-08	-1.32	1.76e-06	1.17e-05	-0.622953	0.00437	0.0504	-0.498	0.0493	0.137	-0.203683	0.408334	0.644971	3.522	2.178	2.164	1.037	1.293	1.078	1.763	0.714	0.623	0.666	0.621	1.049	0.651	0.525	1.479	0.868	1.096	1.012	4.969	4.632
	4930452G13Rik	4930452G13Rik|-|-|14|14 D3|ncRNA	NR_045060	0.292667	0.773	0.9068	0.317667	0.672797	1.07212	1.57704	1.74542	-1.29004	0.00198	0.0116	-1.7459	1.56e-05	7.47e-05	0.244	0.683	0.783	0.23588	0.431	0.762	-1.34	0.00699	0.0317	1.6702	0.00012363	0.00279035	0.408	0.24	0.23	0.379	1.234	0.644	0.835	1.361	0.594	0.67	0.83	1.079	0.087	0.105	0.497	0.344	0.365	0.508	0.435	0.721
	4930452N14Rik	4930452N14Rik|-|-|1|1 G3|ncRNA	NR_040629	0.0113333	0.01125	0.0098	0.028	#DIV/0!	#DIV/0!	0.204167	0.16092	-0.0193514	0.945	1	-0.148073	0.783	1	1.33	0.662	1	0.0314126	0.817	1	1.06	0.7	1	-0.141513	0.959555	1	0	0	0.034	0	0	0	0.045	0	0	0	0.049	0	0	0	0	0.051	0.117	0	0	0
	4930453H23Rik	4930453H23Rik|-|-|X|X A2|protein-coding	NM_001252013	0	0	0	0	#DIV/0!	#DIV/0!	#DIV/0!	#DIV/0!	NA	1	1	NA	1	1	NA	1	1	NA	1	1	NA	1	1	NA	1	1	0	0	0	0	0	0	0	0	0	0	0	0	0	0	0	0	0	0	0	0
	4930453L07Rik	4930453L07Rik|-|-|8|8 A1.1|ncRNA	NR_073360	0	0.003	0	0	0	0.0652174	#DIV/0!	0	-0.0897196	0.748	1	NA	1	1	NA	1	1	0.00913838	0.946	1	-0.583	0.857	1	NA	1	1	0	0	0	0	0.012	0	0	0	0	0	0	0	0	0	0	0	0	0	0.03	0.046
	4930453N24Rik	4930453N24Rik|AI649104|din|-|16|16 C1.3|protein-coding	NM_026273	7.27633	6.93025	7.4306	6.69817	0.936586	1.01602	0.978097	0.760205	-0.120691	0.542	0.713	-0.35534	0.0205	0.047	0.0681	0.729	0.818	0.221315	0.146	0.471	-0.0609	0.743	0.849	0.295294	0.0567971	0.203825	6.841	7.359	7.629	7.877	6.9	6.11	6.834	6.698	7.188	7.654	7.837	7.776	7.878	5.415	6.361	6.853	6.887	6.795	7.769	6.821
	4930455B14Rik	4930455B14Rik|1700027C12Rik|-|14|14 A1|ncRNA	NR_045968	0	0	0	0	#DIV/0!	#DIV/0!	#DIV/0!	#DIV/0!	NA	1	1	NA	1	1	NA	1	1	NA	1	1	NA	1	1	NA	1	1	0	0	0	0	0	0	0	0	0	0	0	0	0	0	0	0	0	0	0	0
	4930455C13Rik	4930455C13Rik|-|-|10|10 A3|ncRNA	NR_045352	5.83167	4.6945	4.3406	3.91317	0.647891	0.900364	1.25306	1.06655	0.128496	0.588	0.748	0.0944209	0.646	0.753	-0.407	0.0412	0.091	0.0355191	0.869	0.961	-0.276	0.212	0.378	0.31762	0.108744	0.30804	5.887	5.989	5.619	3.703	3.829	6.379	4.867	3.375	4.42	3.564	5.149	5.195	2.978	3.212	5.617	4.17	4.23	3.272	9.001	5.214
	4930455D15Rik	4930455D15Rik|-|-|18|18 B1|ncRNA	NR_045381	0	0.0085	0	0.0035	#DIV/0!	#DIV/0!	#DIV/0!	#DIV/0!	-0.142496	0.61	1	NA	1	1	1.13	0.75	1	-0.0216425	0.873	1	-0.992	0.756	1	0.335438	0.915169	1	0	0	0	0	0	0	0.034	0	0	0	0	0	0	0	0	0	0	0.021	0	0
	4930455F16Rik	4930455F16Rik|1700013J11Rik|-|16 A1|16|ncRNA	NR_040571	0	0	0	0	#DIV/0!	#DIV/0!	#DIV/0!	#DIV/0!	NA	1	1	NA	1	1	NA	1	1	NA	1	1	NA	1	1	NA	1	1	0	0	0	0	0	0	0	0	0	0	0	0	0	0	0	0	0	0	0	0
	4930455G09Rik	4930455G09Rik|-|-|4|4 E1|ncRNA	NR_131014	0.627667	1.08875	0.5244	0.887	3.0768	6.15113	2.23149	5.24852	-0.722193	0.131	0.283	-0.0551992	0.925	0.953	0.738	0.272	0.406	-0.526493	0.122	0.428	-0.266	0.64	0.776	-0.659096	0.256754	0.500838	0.792	0.171	0.92	1.393	1.888	0.553	0.521	0.311	0.679	0.837	0.142	0.653	1.821	1.025	0.677	0.295	0.796	0.708	0.204	0.177
	4930455H04Rik	4930455H04Rik|-|-|3|3 G1|ncRNA	NR_040596	0.158	0.223	0.1348	0.158833	0.413613	0.610959	0.680808	1.00527	-0.523277	0.277	0.467	-0.206998	0.736	0.825	0.163	0.826	0.886	-0.231867	0.5	0.805	-0.563	0.391	0.569	0.0848626	0.907023	0.960328	0.157	0.209	0.108	0.276	0.308	0.227	0.081	0	0.08	0.196	0.245	0.153	0.112	0	0.331	0.115	0.267	0.128	0.382	0.365
	4930455J16Rik	4930455J16Rik|-|-|13|13 B1|ncRNA	NR_045469	0	0	0	0	#DIV/0!	#DIV/0!	#DIV/0!	#DIV/0!	NA	1	1	NA	1	1	NA	1	1	NA	1	1	NA	1	1	NA	1	1	0	0	0	0	0	0	0	0	0	0	0	0	0	0	0	0	0	0	0	0
	4930456L15Rik	4930456L15Rik|-|-|4|4 C6|ncRNA	NR_045887	0	0.00575	0	0	0	#DIV/0!	#DIV/0!	#DIV/0!	-0.0897196	0.748	1	NA	1	1	NA	1	1	0.00913838	0.946	1	-0.583	0.857	1	NA	1	1	0	0	0	0	0	0	0.023	0	0	0	0	0	0	0	0	0	0	0	0.036	0
	4930459C07Rik	4930459C07Rik|-|-|10|10 C3|ncRNA	NR_110448	0	0.01575	0	0.009	#DIV/0!	#DIV/0!	#DIV/0!	#DIV/0!	-0.242351	0.423	1	NA	1	1	1.66	0.638	1	-0.0521783	0.703	1	-1.04	0.641	1	-0.199571	0.949398	1	0	0	0	0.048	0.015	0	0	0	0	0	0	0	0	0	0	0.026	0	0.028	0	0
	4930459L07Rik	4930459L07Rik|-|-|5|5 C1|ncRNA	NR_046190	0	0	0	0	#DIV/0!	#DIV/0!	#DIV/0!	#DIV/0!	NA	1	1	NA	1	1	NA	1	1	NA	1	1	NA	1	1	NA	1	1	0	0	0	0	0	0	0	0	0	0	0	0	0	0	0	0	0	0	0	0
	4930461G14Rik	4930461G14Rik|-|-|9|9 B|ncRNA	NR_040736	0	0.00875	0.0252	0	#DIV/0!	0.153509	#DIV/0!	0	-0.0897196	0.748	1	-0.296912	0.579	1	NA	1	1	0.0359416	0.804	1	-0.583	0.857	1	1.51548	0.6292	1	0	0	0	0	0	0	0.035	0.126	0	0	0	0	0	0	0	0	0	0	0	0.057
	4930463O16Rik	4930463O16Rik|-|-|10|10 C1|ncRNA	NR_108059	0.006	0	0	0	#DIV/0!	0	#DIV/0!	#DIV/0!	0.103793	0.71	1	0.0723736	0.893	1	-1.31	0.707	1	NA	1	1	NA	1	1	NA	1	1	0	0	0.018	0	0	0	0	0	0	0	0	0	0	0	0	0	0	0	0	0.01
	4930465K10Rik	4930465K10Rik|-|-|18|18 E3|ncRNA	NR_027978	0.00533333	0.01125	0	0.0133333	#DIV/0!	0.321429	0	#DIV/0!	-0.140616	0.675	1	-0.0715375	0.894	1	1.38	0.597	1	-0.0356868	0.793	1	-0.00156	0.999	1	-0.868279	0.772919	1	0	0	0.016	0.031	0.014	0	0	0	0	0	0	0	0	0	0.029	0.024	0	0.027	0	0.035
	4930465M20Rik	4930465M20Rik|4930431H15Rik|-|12|12 F1|ncRNA	NR_045973	0	0	0	0	#DIV/0!	#DIV/0!	#DIV/0!	#DIV/0!	NA	1	1	NA	1	1	NA	1	1	NA	1	1	NA	1	1	NA	1	1	0	0	0	0	0	0	0	0	0	0	0	0	0	0	0	0	0	0	0	0
	4930467D21Rik	4930467D21Rik|4930448L09Rik|BB013444|-|5 E3|5|ncRNA	NR_045981	0.00433333	0	0	0.002	0.149425	0	0	0.0666667	0.103793	0.71	1	0.0372416	0.945	1	-0.595	0.865	1	NA	1	1	0.619	0.848	1	0.335438	0.915169	1	0.013	0	0	0	0	0	0	0	0	0	0	0	0	0	0	0	0.012	0	0.029	0.03
	4930467E23Rik	4930467E23Rik|ENSMUSG00000074453|OTTMUSG00000018948|TSAP|-|8|8 A1.3|protein-coding	NM_001039553	0	0	0	0	0	#DIV/0!	#DIV/0!	#DIV/0!	NA	1	1	NA	1	1	NA	1	1	NA	1	1	NA	1	1	NA	1	1	0	0	0	0	0	0	0	0	0	0	0	0	0	0	0	0	0	0	0.017	0
	4930467K11Rik	4930467K11Rik|-|-|10|10 B4|ncRNA	NR_045353	0	0.00675	0.019	0.0161667	#DIV/0!	0.217742	#DIV/0!	#DIV/0!	-0.0897196	0.748	1	-0.296912	0.579	1	1.66	0.638	1	0.032221	0.812	1	0.431	0.884	1	0.495006	0.855589	1	0	0	0	0.027	0	0	0	0	0	0	0	0.095	0	0	0	0	0.05	0.047	0	0.031
	4930469G21Rik	4930469G21Rik|-|-|1|1 H2.1|protein-coding	NM_001195189	0.021	0.02375	0.0878	0.013	0.09375	0.169643	0.354032	#DIV/0!	-0.0608509	0.884	1	-1.13399	0.133	0.229	-0.423	0.887	1	0.380016	0.176	1	-0.714	0.783	1	2.64116	0.0964711	1	0.02	0	0.043	0	0.038	0	0.057	0.103	0	0.035	0.157	0.144	0	0	0.078	0	0	0	0.224	0.14
	4930470H14Rik	4930470H14Rik|-|-|17|17 A1|ncRNA	NR_045764	0.00366667	0	0	0	#DIV/0!	0	0	0	0.0334247	0.905	1	-0.0715375	0.894	1	-0.315	0.929	1	NA	1	1	NA	1	1	NA	1	1	0.011	0	0	0	0	0	0	0	0	0	0	0	0	0	0	0	0	0	0	0.013
	4930470O06Rik	4930470O06Rik|-|-|8|8 B3.1|ncRNA	NR_126087	0	0	0	0	#DIV/0!	#DIV/0!	#DIV/0!	#DIV/0!	NA	1	1	NA	1	1	NA	1	1	NA	1	1	NA	1	1	NA	1	1	0	0	0	0	0	0	0	0	0	0	0	0	0	0	0	0	0	0	0	0
	4930470P17Rik	4930470P17Rik|-|-|2|2 H3|ncRNA	NR_027825	0.283	0.09775	0.0432	0.0431667	0.661215	0.30739	0.136278	0.306147	0.845295	0.107	0.245	1.55376	0.0201	0.0463	-2.58	0.0118	0.0321	-0.205441	0.493	0.8	-1.22	0.333	0.512	0.382044	0.774518	1	0.137	0.401	0.311	0	0.103	0.093	0.195	0	0	0.082	0.085	0.049	0	0	0.119	0.066	0	0.074	0.428	0.318
	4930471C04Rik	4930471C04Rik|-|-|14|14 D1|ncRNA	NR_046192	0.0223333	0.008	0.007	0.0138333	0.0322736	0.02589	0.102941	0.112466	0.087464	0.766	1	0.0204935	0.97	1	-0.391	0.895	1	0.0314126	0.817	1	0.683	0.815	1	0.247538	0.933481	1	0.067	0	0	0	0	0	0.032	0	0	0	0.035	0	0	0	0.043	0	0	0.04	0.692	0.309
	4930471G03Rik	4930471G03Rik|1700007N01Rik|-|18|18 B2|ncRNA	NR_015571	0.0536667	0	0	0.0085	#DIV/0!	#DIV/0!	#DIV/0!	#DIV/0!	0.231631	0.416	1	0.285467	0.601	1	-2.1	0.536	1	NA	1	1	0.619	0.848	1	0.335438	0.915169	1	0	0.161	0	0	0	0	0	0	0	0	0	0	0	0	0	0	0	0.051	0	0
	4930471M09Rik	4930471M09Rik|4930427C17Rik|-|6|6 D1|ncRNA	NR_045980	0	0	0	0	#DIV/0!	0	#DIV/0!	#DIV/0!	NA	1	1	NA	1	1	NA	1	1	NA	1	1	NA	1	1	NA	1	1	0	0	0	0	0	0	0	0	0	0	0	0	0	0	0	0	0	0	0	0.02
	4930473A02Rik	4930473A02Rik|-|-|2|2 F1|ncRNA	NR_040348	26.6027	21.2105	18.2576	18.309	1.76037	1.41895	1.39959	1.28647	0.112383	0.675	0.811	0.207086	0.332	0.468	-0.353	0.127	0.226	-0.0772133	0.749	0.92	-0.238	0.398	0.576	0.147797	0.5192	0.726284	27.935	26.575	25.298	28.554	26.101	16.463	13.724	17.427	19.701	26.104	13.717	14.339	24.417	11.311	18.943	20.726	16.587	17.87	15.112	14.948
	4930473O22Rik	4930473O22Rik|-|-|10|10 C3|ncRNA	NR_045356	0	0	0	0	#DIV/0!	#DIV/0!	#DIV/0!	#DIV/0!	NA	1	1	NA	1	1	NA	1	1	NA	1	1	NA	1	1	NA	1	1	0	0	0	0	0	0	0	0	0	0	0	0	0	0	0	0	0	0	0	0
	4930474G06Rik	4930474G06Rik|-|-|18|18 A2|ncRNA	NR_045398	0	0.00325	0.0092	0.0313333	#DIV/0!	0.40625	0.209091	#DIV/0!	-0.142496	0.61	1	-0.453581	0.427	0.561	4.73	0.00909	0.0257	0.0642582	0.707	1	2.9	0.0614	0.161	-1.95794	0.162521	1	0	0	0	0	0.013	0	0	0	0.02	0	0	0.026	0.021	0.1	0.014	0	0.04	0.013	0	0.008
	4930474H20Rik	4930474H20Rik|-|-|14|14 E2.1|ncRNA	NR_045712	0	0	0	0	#DIV/0!	#DIV/0!	#DIV/0!	#DIV/0!	NA	1	1	NA	1	1	NA	1	1	NA	1	1	NA	1	1	NA	1	1	0	0	0	0	0	0	0	0	0	0	0	0	0	0	0	0	0	0	0	0
	4930474M22Rik	4930474M22Rik|-|-|17|17 A2|ncRNA	NR_027986	0	0	0	0	#DIV/0!	0	0	#DIV/0!	NA	1	1	NA	1	1	NA	1	1	NA	1	1	NA	1	1	NA	1	1	0	0	0	0	0	0	0	0	0	0	0	0	0	0	0	0	0	0	0	0.036
	4930474N05Rik	4930474N05Rik|-|-|14|14 B|protein-coding	NM_175008	0	0	0	0	#DIV/0!	#DIV/0!	#DIV/0!	#DIV/0!	NA	1	1	NA	1	1	NA	1	1	NA	1	1	NA	1	1	NA	1	1	0	0	0	0	0	0	0	0	0	0	0	0	0	0	0	0	0	0	0	0
	4930474N09Rik	4930474N09Rik|-|-|12|12 E|ncRNA	NR_038130	0.0423333	0.02125	0	0	0.291954	0.372807	#DIV/0!	#DIV/0!	0.190584	0.672	1	0.442943	0.451	0.584	-3.08	0.34	1	-0.0615462	0.654	1	-2.23	0.48	1	NA	1	1	0	0.092	0.035	0	0.015	0	0.07	0	0	0	0	0	0	0	0	0	0	0	0.145	0.057
	4930477N07Rik	4930477N07Rik|-|-|10|10 D2|ncRNA	NR_126086	0	0	0	0	#DIV/0!	#DIV/0!	#DIV/0!	#DIV/0!	NA	1	1	NA	1	1	NA	1	1	NA	1	1	NA	1	1	NA	1	1	0	0	0	0	0	0	0	0	0	0	0	0	0	0	0	0	0	0	0	0
	4930478L05Rik	4930478L05Rik|-|-|16|16 C3.1|ncRNA	NR_040569	0	0.0035	0.0032	0	#DIV/0!	#DIV/0!	#DIV/0!	#DIV/0!	-0.0897196	0.748	1	-0.296912	0.579	1	NA	1	1	0.0314126	0.817	1	-0.583	0.857	1	1.51548	0.6292	1	0	0	0	0	0	0	0.014	0	0	0	0.016	0	0	0	0	0	0	0	0	0
	4930478P22Rik	4930478P22Rik|4933405A14Rik|-|5|5 B2|ncRNA	NR_046060	0	0	0	0	#DIV/0!	#DIV/0!	#DIV/0!	#DIV/0!	NA	1	1	NA	1	1	NA	1	1	NA	1	1	NA	1	1	NA	1	1	0	0	0	0	0	0	0	0	0	0	0	0	0	0	0	0	0	0	0	0
	4930479D17Rik	4930479D17Rik|-|-|6|6 G3|ncRNA	NR_046277	0.372333	0.31475	0.4142	0.64	0.322367	0.197459	0.287839	0.35107	0.070592	0.885	0.94	-0.285855	0.613	0.726	0.887	0.199	0.32	0.237799	0.487	0.797	0.989	0.116	0.252	-0.526679	0.393304	0.633052	0.207	0.379	0.531	0.132	0.316	0.294	0.517	0.927	0.217	0.245	0.404	0.278	0.457	0	1.002	0.585	0.823	0.973	1.155	1.594
	4930480E11Rik	4930480E11Rik|-|-|X|X B|protein-coding	NM_001177966	0	0	0	0	#DIV/0!	#DIV/0!	#DIV/0!	#DIV/0!	NA	1	1	NA	1	1	NA	1	1	NA	1	1	NA	1	1	NA	1	1	0	0	0	0	0	0	0	0	0	0	0	0	0	0	0	0	0	0	0	0
	4930480G23Rik	4930480G23Rik|-|-|4|4 A3|ncRNA	NR_040768	0.005	0	0	0	#DIV/0!	#DIV/0!	#DIV/0!	#DIV/0!	0.0334247	0.905	1	-0.0715375	0.894	1	-0.315	0.929	1	NA	1	1	NA	1	1	NA	1	1	0.015	0	0	0	0	0	0	0	0	0	0	0	0	0	0	0	0	0	0	0
	4930480K15Rik	4930480K15Rik|-|-|17|17 E5|ncRNA	NR_045463	0.0116667	0.003	0.0232	0.0416667	#DIV/0!	#DIV/0!	#DIV/0!	#DIV/0!	0.132077	0.671	1	-0.426006	0.558	0.68	2.3	0.317	0.453	0.249648	0.25	1	3.78	0.0852	0.202	-0.991406	0.569421	0.762158	0.035	0	0	0	0	0	0.012	0.044	0	0	0.041	0.031	0.043	0.207	0	0	0	0	0	0
	4930480K23Rik	4930480K23Rik|-|-|14|14 D2|ncRNA	NR_130166	0.571333	0.63375	0.5544	0.638833	0.696748	0.568386	0.578706	0.702787	-0.321657	0.181	0.352	-0.25582	0.325	0.461	0.362	0.192	0.312	-0.0682705	0.748	0.919	0.0197	0.935	0.964	-0.0872629	0.72796	0.863702	0.656	0.524	0.534	0.579	0.637	0.639	0.68	0.588	0.625	0.43	0.574	0.555	0.868	0.444	0.667	0.612	0.677	0.565	0.82	1.115
	4930480M12Rik	4930480M12Rik|-|-|12|12 A2|ncRNA	NR_046278	0	0	0	0	#DIV/0!	#DIV/0!	#DIV/0!	#DIV/0!	NA	1	1	NA	1	1	NA	1	1	NA	1	1	NA	1	1	NA	1	1	0	0	0	0	0	0	0	0	0	0	0	0	0	0	0	0	0	0	0	0
	4930481A15Rik	4930481A15Rik|-|-|19|19 A|ncRNA	NR_027938	2.648	2.39425	3.486	3.97833	1.23565	1.31987	1.63508	1.15919	-0.122269	0.587	0.747	-0.810245	0.00165	0.00514	0.857	0.0213	0.0526	0.631378	0.00356	0.0436	0.725	0.0269	0.088	-0.0109985	0.972356	0.98915	2.269	2.79	2.885	2.337	2.301	2.113	2.826	3.225	2.597	2.644	4.451	4.513	2.931	7.285	4.095	2.423	3.564	3.572	2.143	1.814
	4930482G09Rik	4930482G09Rik|-|-|3|3 H3|ncRNA	NR_108044	0.0836667	0.02475	0.033	0.00716667	#DIV/0!	0.305556	0.464789	#DIV/0!	0.441022	0.36	1	0.330186	0.652	0.758	-3.04	0.199	0.321	0.0797148	0.718	1	-1.43	0.538	1	2.2473	0.367786	1	0.069	0.182	0	0.024	0.022	0.053	0	0	0.129	0	0.036	0	0	0	0	0	0.043	0	0	0.081
	4930483J18Rik	4930483J18Rik|-|-|15|15 E1|ncRNA	NR_015603	0	0.004	0.0098	0.0126667	#DIV/0!	#DIV/0!	0.362963	#DIV/0!	-0.0897196	0.748	1	-0.296912	0.579	1	2.08	0.53	1	0.0362764	0.789	1	0.842	0.735	1	0.0706627	0.97587	1	0	0	0	0	0.016	0	0	0	0.049	0	0	0	0	0	0.017	0.028	0	0.031	0	0
	4930483K19Rik	4930483K19Rik|-|-|10|10 C1|ncRNA	NR_045354	2.76467	3.0775	2.8352	2.52567	1.38095	1.74659	3.29674	4.04754	-0.3046	0.354	0.547	-0.373513	0.122	0.214	0.0083	0.982	0.989	0.036055	0.891	0.967	-0.338	0.366	0.544	0.379533	0.198874	0.435409	2.803	3.469	2.022	2.11	1.848	5.13	3.222	2.375	3.627	2.673	2.898	2.603	1.124	1.165	3.263	3.547	2.401	3.654	2.002	1.762
	4930483O08Rik	4930483O08Rik|-|-|7|7 F3|ncRNA	NR_046279	0.033	0.089	0.1038	0.103833	#DIV/0!	2.06977	#DIV/0!	2.35985	-0.494759	0.332	0.523	-1.01289	0.174	0.285	1.82	0.183	0.301	0.0777016	0.805	0.939	0.277	0.799	0.888	0.00311918	0.997437	0.999013	0.019	0	0.08	0	0.087	0.084	0.185	0.095	0.052	0.048	0.058	0.266	0	0.294	0.108	0.12	0.035	0.066	0	0.043
	4930484H19Rik	4930484H19Rik|-|-|10|10 D3|ncRNA	NR_131015	0.02	0.04175	0.1766	0.0281667	0.833333	0.662698	2.63582	3.12963	-0.416663	0.423	0.613	-2.61017	3.49e-05	0.000155	0.591	0.721	0.812	1.06227	0.00196	0.0283	-0.598	0.658	0.79	2.95507	0.000539051	0.00810784	0.011	0.037	0.012	0.011	0.01	0.099	0.047	0.224	0.213	0.141	0.188	0.117	0	0	0	0.071	0.02	0.078	0.024	0.063
	4930486F22Rik	4930486F22Rik|-|-|10 C1|10|ncRNA	NR_038024	0.102333	0	0	0	0.673246	#DIV/0!	#DIV/0!	#DIV/0!	0.333651	1	1	0.403932	1	1	-3.26	0.334	1	NA	1	1	NA	1	1	NA	1	1	0	0.307	0	0	0	0	0	0	0	0	0	0	0	0	0	0	0	0	0.152	0
	4930486I03Rik	4930486I03Rik|-|-|1|1 A4|ncRNA	NR_045734	0	0	0.0174	0	#DIV/0!	#DIV/0!	0.153982	#DIV/0!	NA	1	1	-0.296912	0.579	1	NA	1	1	0.0614787	0.649	1	NA	1	1	1.51548	0.6292	1	0	0	0	0	0	0	0	0	0	0	0	0.087	0	0	0	0	0	0	0	0
	4930486L24Rik	4930486L24Rik|AW545031|-|13|13 B2|protein-coding	NM_178098	0	0.03775	0.01	0.0476667	0	0.33114	0.0925926	0.253546	-0.610886	0.151	1	-0.296912	0.579	1	4.39	0.0641	0.13	-0.186504	0.395	1	0.422	0.776	0.873	-2.24913	0.241766	1	0	0	0	0	0.039	0.032	0.08	0	0	0	0	0.05	0	0.166	0	0.045	0	0.075	0.125	0.114
	4930487D11Rik	4930487D11Rik|-|-|5|5 B3|ncRNA	NR_046191	0	0	0	0	#DIV/0!	#DIV/0!	#DIV/0!	#DIV/0!	NA	1	1	NA	1	1	NA	1	1	NA	1	1	NA	1	1	NA	1	1	0	0	0	0	0	0	0	0	0	0	0	0	0	0	0	0	0	0	0	0
	4930487H11Rik	4930487H11Rik|-|-|1|1 C2|ncRNA	NR_040601	0.007	0.043	0	0.00583333	0.0736842	0.434343	0	#DIV/0!	-0.451306	0.294	1	-0.0715375	0.894	1	0.166	0.963	1	-0.142414	0.412	1	-2.42	0.239	1	0.335438	0.915169	1	0.021	0	0	0.022	0.101	0.049	0	0	0	0	0	0	0	0	0	0.035	0	0	0.095	0.099
	4930488B22Rik	4930488B22Rik|-|-|1|1 H5|ncRNA	NR_040627	0	0	0	0	#DIV/0!	#DIV/0!	#DIV/0!	#DIV/0!	NA	1	1	NA	1	1	NA	1	1	NA	1	1	NA	1	1	NA	1	1	0	0	0	0	0	0	0	0	0	0	0	0	0	0	0	0	0	0	0	0
	4930488L21Rik	4930488L21Rik|4930452J22Rik|-|8|8 C5|ncRNA	NR_026888	0.215	0.46825	0.6514	0.546333	0.671875	1.70894	1.64495	1.56543	-1.08626	0.00468	0.023	-1.75478	5.83e-06	3.05e-05	1.53	3.34e-06	2.12e-05	0.459321	0.121	0.426	0.25	0.417	0.594	0.362225	0.225729	0.464762	0.215	0.231	0.199	0.334	0.299	0.582	0.658	0.577	0.601	0.352	0.736	0.991	0.493	0.528	0.565	0.662	0.498	0.532	0.32	0.274
	4930500F04Rik	4930500F04Rik|4931407C17Rik|-|5|5 G3|ncRNA	NR_045758	0	0	0	0	#DIV/0!	#DIV/0!	#DIV/0!	#DIV/0!	NA	1	1	NA	1	1	NA	1	1	NA	1	1	NA	1	1	NA	1	1	0	0	0	0	0	0	0	0	0	0	0	0	0	0	0	0	0	0	0	0
	4930500L23Rik	4930500L23Rik|-|-|5|5 G2|ncRNA	NR_040701	0	0	0	0.00833333	0	#DIV/0!	#DIV/0!	#DIV/0!	NA	1	1	NA	1	1	1.52	0.668	1	NA	1	1	1.01	0.754	1	-0.0545342	0.986171	1	0	0	0	0	0	0	0	0	0	0	0	0	0	0	0.05	0	0	0	0.172	0
	4930502A04Rik	4930502A04Rik|-|-|9|9 C|ncRNA	NR_040737	0	0	0	0	#DIV/0!	#DIV/0!	#DIV/0!	#DIV/0!	NA	1	1	NA	1	1	NA	1	1	NA	1	1	NA	1	1	NA	1	1	0	0	0	0	0	0	0	0	0	0	0	0	0	0	0	0	0	0	0	0
	4930502E09Rik	4930502E09Rik|-|-|11|11 C|ncRNA	NR_046281	0	0	0.0168	0.00416667	#DIV/0!	0	#DIV/0!	#DIV/0!	NA	1	1	-0.404576	0.452	1	1.13	0.75	1	0.0926903	0.496	1	0.619	0.848	1	1.60225	0.603348	1	0	0	0	0	0	0	0	0	0	0.044	0.04	0	0	0	0.025	0	0	0	0	0.059
	4930502E18Rik	4930502E18Rik|Ct55|-|X|X A5|protein-coding	NM_029142	0.0846667	0.0265	0.0418	0.0426667	0.596244	0.102317	0.564865	0.211221	0.552352	0.285	0.475	0.398179	0.591	0.708	-0.873	0.38	0.517	0.121635	0.62	1	0.648	0.623	0.764	0.210834	0.854645	1	0.096	0.072	0.086	0	0.015	0	0.091	0.082	0	0.027	0.1	0	0.016	0	0.046	0.077	0.06	0.057	0.142	0.259
	4930503B20Rik	4930503B20Rik|1700013A07Rik|1700095G21Rik|4930483N21Rik|Gm1652|Samd13|-|3|3 H2|protein-coding	NM_029144	0.02	0.04025	0.013	0.033	#DIV/0!	0.457386	0.224138	0.366667	-0.253418	0.571	1	-0.0729707	0.907	1	0.804	0.675	0.777	-0.0731697	0.692	1	-0.38	0.818	0.899	-0.427478	0.837755	1	0.019	0	0.041	0	0.107	0	0.054	0	0	0.065	0	0	0	0	0.073	0.091	0	0.034	0	0.088
	4930503E14Rik	4930503E14Rik|-|-|14|14 C1|protein-coding	NM_029131	0	0	0	0	#DIV/0!	#DIV/0!	#DIV/0!	#DIV/0!	NA	1	1	NA	1	1	NA	1	1	NA	1	1	NA	1	1	NA	1	1	0	0	0	0	0	0	0	0	0	0	0	0	0	0	0	0	0	0	0	0
	4930503E24Rik	4930503E24Rik|-|-|10|10 D2|pseudo	NR_028310	3.53633	3.319	3.0064	4.08667	1.43404	1.49572	1.3043	1.11749	-0.0867784	0.743	0.855	-0.0650488	0.794	0.866	0.418	0.256	0.388	-0.017907	0.941	0.981	0.316	0.368	0.546	-0.332996	0.29585	0.544265	3.578	3.202	3.829	3.492	2.092	3.945	3.747	3.305	2.684	1.9	3.495	3.648	2.169	7.081	3.958	3.198	4.133	3.981	2.466	2.219
	4930503F20Rik	4930503F20Rik|4930453C15|-|14|14 B|ncRNA	NR_131113	0	0	0	0	#DIV/0!	#DIV/0!	#DIV/0!	#DIV/0!	NA	1	1	NA	1	1	NA	1	1	NA	1	1	NA	1	1	NA	1	1	0	0	0	0	0	0	0	0	0	0	0	0	0	0	0	0	0	0	0	0
	4930503H13Rik	4930503H13Rik|-|-|X|X F4|pseudo	NR_033598	0	0	0	0.00483333	#DIV/0!	#DIV/0!	#DIV/0!	#DIV/0!	NA	1	1	NA	1	1	1.13	0.75	1	NA	1	1	0.619	0.848	1	0.335438	0.915169	1	0	0	0	0	0	0	0	0	0	0	0	0	0	0	0.029	0	0	0	0	0
	4930503L19Rik	4930503L19Rik|9930107F24|BB148262|Lars|Las2|-|18|18 E2|protein-coding	NM_172967	1.75033	1.4915	1.026	0.703667	0.571631	0.803177	0.770849	0.703667	0.0173933	0.947	0.974	0.424112	0.0613	0.12	-1.18	0.000535	0.00215	-0.369465	0.0872	0.356	-1.16	0.000317	0.0026	0.742276	0.010016	0.0651385	2.161	1.518	1.572	1.814	1.723	1.235	1.194	1.156	0.957	1.143	1.006	0.868	0.353	0.315	0.963	1.04	0.907	0.644	3.062	1.857
	4930503O07Rik	4930503O07Rik|-|-|1|1 H6|ncRNA	NR_040477	0	0	0	0	#DIV/0!	0	#DIV/0!	#DIV/0!	NA	1	1	NA	1	1	NA	1	1	NA	1	1	NA	1	1	NA	1	1	0	0	0	0	0	0	0	0	0	0	0	0	0	0	0	0	0	0	0	0.039
	4930504C09Rik	4930504C09Rik|-|-|15|15 D3|ncRNA	NR_130983	0	0	0	0	#DIV/0!	0	#DIV/0!	#DIV/0!	NA	1	1	NA	1	1	NA	1	1	NA	1	1	NA	1	1	NA	1	1	0	0	0	0	0	0	0	0	0	0	0	0	0	0	0	0	0	0	0	0.02
	4930504O13Rik	4930504O13Rik|Gm524|Lypd9|-|11|11 B1.3|protein-coding	NM_207527	0	0	0	0	#DIV/0!	#DIV/0!	#DIV/0!	#DIV/0!	NA	1	1	NA	1	1	NA	1	1	NA	1	1	NA	1	1	NA	1	1	0	0	0	0	0	0	0	0	0	0	0	0	0	0	0	0	0	0	0	0
	4930505A04Rik	4930505A04Rik|-|-|11|11 A4|protein-coding	NM_001100394	0.129333	0.111	0.0586	0.122333	0.699099	0.917355	0.457813	1.85354	0.00363657	0.995	0.998	0.350096	0.641	0.749	0.153	0.872	0.918	-0.172387	0.589	0.853	0.174	0.81	0.894	-0.687762	0.446404	0.674662	0.062	0.304	0.022	0.106	0.137	0.142	0.059	0	0	0.089	0.13	0.074	0.122	0.124	0.241	0.134	0.039	0.074	0.185	0.121
	4930505G20Rik	4930505G20Rik|-|-|14|14 E4|ncRNA	NR_045761	0	0	0.0246	0	#DIV/0!	#DIV/0!	#DIV/0!	#DIV/0!	NA	1	1	-0.296912	0.579	1	NA	1	1	0.0614787	0.649	1	NA	1	1	1.51548	0.6292	1	0	0	0	0	0	0	0	0	0	0	0	0.123	0	0	0	0	0	0	0	0
	4930505K13Rik	4930505K13Rik|-|-|7|7 F2|ncRNA	NR_130979	0	0	0	0	#DIV/0!	0	#DIV/0!	#DIV/0!	NA	1	1	NA	1	1	NA	1	1	NA	1	1	NA	1	1	NA	1	1	0	0	0	0	0	0	0	0	0	0	0	0	0	0	0	0	0	0	0	0.041
	4930505K14Rik	4930505K14Rik|-|-|5|5 G3|ncRNA	NR_131106	0	0	0	0	#DIV/0!	#DIV/0!	#DIV/0!	#DIV/0!	NA	1	1	NA	1	1	NA	1	1	NA	1	1	NA	1	1	NA	1	1	0	0	0	0	0	0	0	0	0	0	0	0	0	0	0	0	0	0	0	0
	4930506A18Rik	4930506A18Rik|-|-|8|8 D3|ncRNA	NR_126090	0.0506667	0.227	0.2832	0.122	#DIV/0!	10.3182	2.46261	4.2069	-1.16482	0.0297	0.0958	-2.06505	0.00132	0.00423	1.45	0.192	0.312	0.189266	0.581	0.85	-0.94	0.226	0.394	1.31081	0.036418	0.153364	0.112	0	0.04	0.398	0.123	0.042	0.345	0.191	0.312	0.272	0.174	0.467	0.201	0	0.072	0.15	0.209	0.1	0	0.022
	4930506C21Rik	4930506C21Rik|-|-|17|17 A1|ncRNA	NR_073374	0.236667	0.722	0.7516	1.0515	0.185913	0.45125	0.363971	0.703815	-1.46725	0.000294	0.00247	-1.77435	5.8e-05	0.000247	2.29	0.000561	0.00224	0.134932	0.644	0.877	0.505	0.355	0.534	-0.313635	0.54618	0.745465	0.236	0.177	0.297	0.681	0.555	0.67	0.982	0.906	0.659	0.507	0.982	0.704	0.096	1.403	1.979	0.826	0.809	1.196	1.273	1.6
	4930507D05Rik	4930507D05Rik|-|-|10|10 B4|ncRNA	NR_027926	0.530667	0.538	0.3186	0.420333	0.471285	0.377544	0.402273	0.61095	-0.15169	0.683	0.816	0.307043	0.42	0.554	-0.167	0.593	0.713	-0.366388	0.246	0.601	-0.336	0.359	0.537	-0.157969	0.644045	0.814047	0.514	0.627	0.451	0.283	0.327	0.81	0.732	0.134	0.364	0.299	0.516	0.28	0.273	0.5	0.429	0.492	0.439	0.389	1.126	1.425
	4930507D10Rik	4930507D10Rik|-|-|11|11 B5|ncRNA	NR_110449	0	0.0095	0.0156	0	0	#DIV/0!	#DIV/0!	#DIV/0!	-0.0897196	0.748	1	-0.417814	0.441	1	NA	1	1	0.0659597	0.652	1	-0.583	0.857	1	2.37466	0.446691	1	0	0	0	0	0	0.038	0	0	0	0	0.078	0	0	0	0	0	0	0	0.074	0
	4930509E16Rik	4930509E16Rik|-|-|9|9 D|ncRNA	NR_045735	0.039	0.061	0.0606	0.0355	#DIV/0!	3.21053	#DIV/0!	#DIV/0!	-0.287236	0.573	0.737	-0.242099	0.743	0.83	-0.11	0.945	0.966	-0.0350526	0.888	0.967	-0.973	0.453	0.627	0.739978	0.63848	1	0.048	0	0.069	0.114	0.015	0	0.115	0.246	0	0	0	0.057	0	0	0.016	0.052	0.03	0.115	0	0.019
	4930509J09Rik	4930509J09Rik|-|-|3|3 E3|ncRNA	NR_040547	0	0.003	0	0	0	0.2	0	#DIV/0!	-0.0897196	0.748	1	NA	1	1	NA	1	1	0.00913838	0.946	1	-0.583	0.857	1	NA	1	1	0	0	0	0	0.012	0	0	0	0	0	0	0	0	0	0	0	0	0	0.028	0.015
	4930509K18Rik	4930509K18Rik|-|-|4|4 A5|ncRNA	NR_040663	0	0	0	0	#DIV/0!	#DIV/0!	0	#DIV/0!	NA	1	1	NA	1	1	NA	1	1	NA	1	1	NA	1	1	NA	1	1	0	0	0	0	0	0	0	0	0	0	0	0	0	0	0	0	0	0	0	0
	4930511A02Rik	4930511A02Rik|-|-|12|12 A1.1|ncRNA	NR_045966	0	0.00475	0	0.00266667	0	0.431818	#DIV/0!	0.0683761	-0.142496	0.61	1	NA	1	1	1.13	0.75	1	-0.01273	0.925	1	-0.642	0.842	1	0.335438	0.915169	1	0	0	0	0	0.019	0	0	0	0	0	0	0	0	0	0	0.016	0	0	0.044	0.011
	4930511A08Rik	4930511A08Rik|-|-|6|6 D1|ncRNA	NR_130996	0.0163333	0.0115	0.0152	0.0158333	#DIV/0!	#DIV/0!	#DIV/0!	#DIV/0!	-0.0193514	0.945	1	-0.170398	0.751	1	0.555	0.875	1	0.0362764	0.789	1	0.287	0.929	1	0.644617	0.837129	1	0.049	0	0	0	0.046	0	0	0	0	0	0.076	0	0	0	0.095	0	0	0	0	0
	4930511E03Rik	4930511E03Rik|-|-|6|6 D2|ncRNA	NR_040761	0.00866667	0	0	0.00233333	#DIV/0!	0	#DIV/0!	#DIV/0!	0.160833	0.566	1	0.140349	0.795	1	-1.26	0.694	1	NA	1	1	0.619	0.848	1	0.335438	0.915169	1	0.017	0	0.009	0	0	0	0	0	0	0	0	0	0	0	0	0.014	0	0	0	0.02
	4930511M06Rik	4930511M06Rik|-|-|18|18 D3|ncRNA	NR_027944	0.0103333	0.00525	0.0144	0.0315	0.215278	0.308824	1.30909	#DIV/0!	0.100414	0.766	1	-0.247073	0.723	0.815	1.84	0.322	0.459	0.139319	0.472	1	2.71	0.133	0.276	-0.989106	0.526021	0.731305	0	0	0.031	0	0	0	0.021	0	0.06	0.012	0	0	0	0.143	0.021	0.012	0.013	0	0.048	0.017
	4930512B01Rik	4930512B01Rik|4930472D12Rik|-|12|12 C2|ncRNA	NR_033573	1.11633	1.034	0.8138	1.06583	0.68613	0.775112	1.18285	2.32208	-0.0695865	0.807	0.892	0.0729631	0.812	0.879	0.107	0.688	0.787	-0.1225	0.608	0.858	0.0355	0.877	0.933	-0.170193	0.488695	0.704525	1.406	1.141	0.802	0.866	0.965	1.226	1.079	0.622	0.641	1.009	0.927	0.87	0.782	0.802	1.45	1.134	1.212	1.015	1.627	1.334
	4930512J16Rik	4930512J16Rik|-|-|6|6 D1|ncRNA	NR_131021	0.0146667	0	0	0	#DIV/0!	#DIV/0!	#DIV/0!	#DIV/0!	0.211199	0.456	1	0.238007	0.662	1	-2.31	0.497	1	NA	1	1	NA	1	1	NA	1	1	0	0	0.044	0	0	0	0	0	0	0	0	0	0	0	0	0	0	0	0	0
	4930512M02Rik	4930512M02Rik|-|-|11|11 A1|protein-coding	NM_001305143	0	0	0	0	#DIV/0!	#DIV/0!	#DIV/0!	#DIV/0!	NA	1	1	NA	1	1	NA	1	1	NA	1	1	NA	1	1	NA	1	1	0	0	0	0	0	0	0	0	0	0	0	0	0	0	0	0	0	0	0	0
	4930513D17Rik	4930513D17Rik|-|-|5|5 B3|ncRNA	NR_045416	0	0.01625	0.0252	0.00433333	#DIV/0!	0.855263	1.008	0.333333	-0.206124	0.466	1	-0.603028	0.322	0.458	1.13	0.75	1	0.057791	0.759	1	-1.59	0.616	1	2.31237	0.34688	1	0	0	0	0.065	0	0	0	0	0	0.069	0	0.057	0	0	0	0.026	0	0	0	0.019
	4930513N10Rik	4930513N10Rik|-|-|8|8 D1|ncRNA	NR_015574	0.373667	0.20075	0.0974	0.0943333	0.423658	0.347318	0.319344	0.277451	0.631032	0.081	0.2	1.5261	0.00108	0.00353	-1.9	0.0238	0.0578	-0.625142	0.0573	0.276	-1.19	0.12	0.257	0.257134	0.752506	0.876796	0.321	0.491	0.309	0.16	0.218	0.279	0.146	0.07	0.114	0.047	0.085	0.171	0	0	0.198	0.143	0.127	0.098	0.882	0.578
	4930513O06Rik	4930513O06Rik|-|-|X|X F1|protein-coding	NM_029174	0	0	0	0	#DIV/0!	#DIV/0!	#DIV/0!	#DIV/0!	NA	1	1	NA	1	1	NA	1	1	NA	1	1	NA	1	1	NA	1	1	0	0	0	0	0	0	0	0	0	0	0	0	0	0	0	0	0	0	0	0
	4930515B02Rik	4930515B02Rik|-|-|4|4 D3|ncRNA	NR_040654	0	0	0	0	#DIV/0!	#DIV/0!	#DIV/0!	#DIV/0!	NA	1	1	NA	1	1	NA	1	1	NA	1	1	NA	1	1	NA	1	1	0	0	0	0	0	0	0	0	0	0	0	0	0	0	0	0	0	0	0	0
	4930515G01Rik	4930515G01Rik|-|-|5|5 F|ncRNA	NR_027872	0.250333	0.1935	0.109	0.137667	0.565087	0.574184	1.53521	0.495204	0.111326	0.82	0.9	0.720044	0.239	0.366	-0.644	0.407	0.543	-0.324869	0.341	0.696	-0.47	0.534	0.696	-0.258622	0.746127	0.873543	0.199	0.206	0.346	0.155	0.301	0.035	0.283	0	0.085	0.092	0.095	0.273	0.12	0.393	0.103	0.099	0.029	0.082	0.443	0.337
	4930515G16Rik	4930515G16Rik|-|-|6|6 C1|pseudo	NR_003100	0.0283333	0.00975	0.0588	0.04	#DIV/0!	#DIV/0!	#DIV/0!	#DIV/0!	0.0560396	0.852	1	-0.215741	0.741	0.828	0.474	0.848	1	0.0724465	0.625	1	1.14	0.672	1	0.589526	0.809899	1	0.041	0	0.044	0	0.039	0	0	0	0	0	0	0.294	0	0.163	0	0	0.077	0	0	0
	4930515L03Rik	4930515L03Rik|-|-|2|2 A3|ncRNA	NR_040632	0	0.07425	0.1118	0.031	#DIV/0!	#DIV/0!	#DIV/0!	#DIV/0!	-0.450943	0.241	1	-1.38361	0.0586	0.116	2.17	0.537	1	0.16189	0.559	1	-1.14	0.535	1	1.89072	0.212123	1	0	0	0	0	0.037	0.09	0.17	0	0.111	0.102	0.062	0.284	0	0	0.115	0	0	0.071	0	0
	4930515L19Rik	4930515L19Rik|-|-|X|X A4|ncRNA	NR_045440	0	0	0	0	#DIV/0!	#DIV/0!	#DIV/0!	#DIV/0!	NA	1	1	NA	1	1	NA	1	1	NA	1	1	NA	1	1	NA	1	1	0	0	0	0	0	0	0	0	0	0	0	0	0	0	0	0	0	0	0	0
	4930517E11Rik	4930517E11Rik|-|-|2|2 F1|ncRNA	NR_040611	0	0	0	0	#DIV/0!	#DIV/0!	#DIV/0!	#DIV/0!	NA	1	1	NA	1	1	NA	1	1	NA	1	1	NA	1	1	NA	1	1	0	0	0	0	0	0	0	0	0	0	0	0	0	0	0	0	0	0	0	0
	4930517M08Rik	4930517M08Rik|-|-|17 A1|17|ncRNA	NR_130984	0	0	0	0	#DIV/0!	#DIV/0!	0	#DIV/0!	NA	1	1	NA	1	1	NA	1	1	NA	1	1	NA	1	1	NA	1	1	0	0	0	0	0	0	0	0	0	0	0	0	0	0	0	0	0	0	0	0
	4930518J21Rik	4930518J21Rik|-|-|8|8 B2|ncRNA	NR_131020	0	0	0	0	0	#DIV/0!	#DIV/0!	#DIV/0!	NA	1	1	NA	1	1	NA	1	1	NA	1	1	NA	1	1	NA	1	1	0	0	0	0	0	0	0	0	0	0	0	0	0	0	0	0	0	0	0.075	0
	4930518P08Rik	4930518P08Rik|-|-|13 A5|13|ncRNA	NR_045364	0	0	0	0	#DIV/0!	#DIV/0!	#DIV/0!	#DIV/0!	NA	1	1	NA	1	1	NA	1	1	NA	1	1	NA	1	1	NA	1	1	0	0	0	0	0	0	0	0	0	0	0	0	0	0	0	0	0	0	0	0
	4930519D14Rik	4930519D14Rik|-|-|13|13 A3.2|ncRNA	NR_045975	0	0.0095	0	0	#DIV/0!	#DIV/0!	#DIV/0!	#DIV/0!	-0.0897196	0.748	1	NA	1	1	NA	1	1	0.00913838	0.946	1	-0.583	0.857	1	NA	1	1	0	0	0	0	0	0.038	0	0	0	0	0	0	0	0	0	0	0	0	0	0
	4930519F09Rik	4930519F09Rik|-|-|10|10 A4|pseudo	NR_033601	4.05733	4.11225	3.412	3.16767	1.21623	1.20842	1.28658	0.828581	-0.21329	0.418	0.608	-0.0965349	0.709	0.804	-0.158	0.484	0.617	-0.109221	0.663	0.886	-0.391	0.133	0.275	0.263084	0.287932	0.535727	4.551	3.898	3.723	5.005	5.205	3.507	2.732	3.097	3.897	5.086	2.68	2.3	4.025	2.595	3.693	2.813	3.073	2.807	3.336	3.403
	4930519F16Rik	4930519F16Rik|Ppnx|-|X D|X 45.97 cM|protein-coding	NM_029170	0.046	0.02475	0.0168	0.047	#DIV/0!	#DIV/0!	#DIV/0!	3.61538	0.232797	0.628	1	0.50605	0.467	0.598	0.317	0.836	0.893	-0.0811997	0.689	1	1.18	0.411	0.588	-2.04991	0.23448	1	0.049	0	0.089	0	0.015	0.037	0.047	0.084	0	0	0	0	0.178	0	0.048	0.027	0	0.029	0	0
	4930519F24Rik	4930519F24Rik|-|-|9|9 E3.3|ncRNA	NR_040763	0	0.00775	0	0	0	0.198718	#DIV/0!	#DIV/0!	-0.0897196	0.748	1	NA	1	1	NA	1	1	0.00913838	0.946	1	-0.583	0.857	1	NA	1	1	0	0	0	0	0.031	0	0	0	0	0	0	0	0	0	0	0	0	0	0.148	0.039
	4930519G04Rik	4930519G04Rik|1700014B12Rik|-|5|5 F|protein-coding	NM_026263	0.00633333	0.0055	0	0	0.301587	0.5	#DIV/0!	0	-0.010079	0.978	1	0.0552148	0.918	1	-1.19	0.732	1	-0.0161866	0.905	1	-1.28	0.691	1	NA	1	1	0.009	0	0.01	0	0.009	0	0.013	0	0	0	0	0	0	0	0	0	0	0	0.021	0.011
	4930519H02Rik	4930519H02Rik|-|-|5|5 A2|ncRNA	NR_045974	0	0	0	0	#DIV/0!	#DIV/0!	#DIV/0!	#DIV/0!	NA	1	1	NA	1	1	NA	1	1	NA	1	1	NA	1	1	NA	1	1	0	0	0	0	0	0	0	0	0	0	0	0	0	0	0	0	0	0	0	0
	4930519K11Rik	4930519K11Rik|-|-|14|14 A3|ncRNA	NR_131107	0.0453333	0.01475	0.138	0.174333	#DIV/0!	0.307292	0.71875	0.761281	0.142453	0.675	1	-0.850506	0.259	0.39	2.12	0.133	0.235	0.361773	0.131	1	3.38	0.0252	0.0837	-0.127044	0.908044	0.960623	0	0.047	0.089	0	0	0	0.059	0	0	0.071	0.323	0.296	0.041	0.41	0.24	0.2	0.155	0	0	0.048
	4930520O04Rik	4930520O04Rik|-|-|9|9 F3|ncRNA	NR_040384	0.362333	0.07075	0.006	0.0663333	0.265251	0.165691	0.0740741	0.436404	1.30946	0.0133	0.0518	2.61538	0.000378	0.00137	-2.3	0.0122	0.0329	-0.282158	0.216	1	-0.0715	0.951	0.974	-2.01555	0.21663	1	0.403	0.552	0.132	0	0.049	0.159	0.075	0	0	0.03	0	0	0	0	0.152	0.085	0.098	0.063	1.366	0.427
	4930520P13Rik	4930520P13Rik|-|-|13|13 C1|ncRNA	NR_036596	0	0	0	0	#DIV/0!	0	#DIV/0!	#DIV/0!	NA	1	1	NA	1	1	NA	1	1	NA	1	1	NA	1	1	NA	1	1	0	0	0	0	0	0	0	0	0	0	0	0	0	0	0	0	0	0	0	0.088
	4930521E06Rik	4930521E06Rik|-|-|1|1 C1.1|ncRNA	NR_040602	0	0	0	0	#DIV/0!	#DIV/0!	#DIV/0!	#DIV/0!	NA	1	1	NA	1	1	NA	1	1	NA	1	1	NA	1	1	NA	1	1	0	0	0	0	0	0	0	0	0	0	0	0	0	0	0	0	0	0	0	0
	4930522H14Rik	4930522H14Rik|1700007J23Rik|-|4|4 C7|protein-coding	NM_026291	0	0	0	0	#DIV/0!	#DIV/0!	#DIV/0!	#DIV/0!	NA	1	1	NA	1	1	NA	1	1	NA	1	1	NA	1	1	NA	1	1	0	0	0	0	0	0	0	0	0	0	0	0	0	0	0	0	0	0	0	0
	4930522O17Rik	4930522O17Rik|-|-|4|4 B2|ncRNA	NR_040665	0	0	0	0	0	#DIV/0!	#DIV/0!	#DIV/0!	NA	1	1	NA	1	1	NA	1	1	NA	1	1	NA	1	1	NA	1	1	0	0	0	0	0	0	0	0	0	0	0	0	0	0	0	0	0	0	0.095	0
	4930523C07Rik	4930523C07Rik|-|-|1|1 H1|protein-coding	NM_001162896	0.801667	1.00925	0.9822	0.8875	1.51831	2.62143	1.94881	2.23552	-0.506455	0.0449	0.13	-0.631648	0.00195	0.00598	0.346	0.153	0.262	0.0917661	0.659	0.885	-0.196	0.429	0.605	0.297095	0.15571	0.377373	0.872	0.832	0.701	1.084	1.269	0.968	0.716	0.799	0.991	1.217	0.887	1.017	1.143	0.666	1.054	0.795	0.761	0.906	0.528	0.385
	4930523O13Rik	4930523O13Rik|4921524H24Rik|-|15|15 B3.3|ncRNA	NR_040451	0	0	0	0	#DIV/0!	#DIV/0!	#DIV/0!	#DIV/0!	NA	1	1	NA	1	1	NA	1	1	NA	1	1	NA	1	1	NA	1	1	0	0	0	0	0	0	0	0	0	0	0	0	0	0	0	0	0	0	0	0
	4930524B15Rik	4930524B15Rik|-|-|11|11 A4|protein-coding	NM_026262	0.0346667	0	0.0192	0.023	0.159021	0	1.28	0.5	0.689153	0.103	1	0.182166	0.809	0.876	-0.439	0.77	0.849	0.167877	0.303	1	3.14	0.177	1	0.0679706	0.968668	1	0.049	0.044	0.011	0	0	0	0	0	0	0	0.061	0.035	0	0	0.085	0.016	0.037	0	0.218	0.023
	4930524B17Rik	4930524B17Rik|-|-|6|6 A2|ncRNA	NR_126084	0	0	0	0	#DIV/0!	#DIV/0!	#DIV/0!	#DIV/0!	NA	1	1	NA	1	1	NA	1	1	NA	1	1	NA	1	1	NA	1	1	0	0	0	0	0	0	0	0	0	0	0	0	0	0	0	0	0	0	0	0
	4930524C18Rik	4930524C18Rik|-|-|14|14 E4|ncRNA	NR_045661	0	0	0	0	#DIV/0!	#DIV/0!	#DIV/0!	#DIV/0!	NA	1	1	NA	1	1	NA	1	1	NA	1	1	NA	1	1	NA	1	1	0	0	0	0	0	0	0	0	0	0	0	0	0	0	0	0	0	0	0	0
	4930524N10Rik	4930524N10Rik|-|-|X|X F3|protein-coding	NM_001256259	0	0	0	0	#DIV/0!	#DIV/0!	#DIV/0!	#DIV/0!	NA	1	1	NA	1	1	NA	1	1	NA	1	1	NA	1	1	NA	1	1	0	0	0	0	0	0	0	0	0	0	0	0	0	0	0	0	0	0	0	0
	4930524O05Rik	4930524O05Rik|-|-|19|19 A|ncRNA	NR_045316	0.0216667	0.0075	0	0	#DIV/0!	#DIV/0!	#DIV/0!	#DIV/0!	0.0402704	0.886	1	0.0372416	0.945	1	-1.08	0.759	1	0.00913838	0.946	1	-0.583	0.857	1	NA	1	1	0.065	0	0	0	0.03	0	0	0	0	0	0	0	0	0	0	0	0	0	0	0
	4930524O08Rik	4930524O08Rik|-|-|9|9 E3.1|ncRNA	NR_040735	0	0.00475	0	0	#DIV/0!	#DIV/0!	#DIV/0!	#DIV/0!	-0.0897196	0.748	1	NA	1	1	NA	1	1	0.00913838	0.946	1	-0.583	0.857	1	NA	1	1	0	0	0	0	0	0	0.019	0	0	0	0	0	0	0	0	0	0	0	0	0
	4930525C09Rik	4930525C09Rik|-|-|10|10 C3|ncRNA	NR_130993	0	0	0	0	#DIV/0!	#DIV/0!	0	#DIV/0!	NA	1	1	NA	1	1	NA	1	1	NA	1	1	NA	1	1	NA	1	1	0	0	0	0	0	0	0	0	0	0	0	0	0	0	0	0	0	0	0	0
	4930525D18Rik	4930525D18Rik|-|-|9|9 F3|ncRNA	NR_040738	0.00733333	0	0	0	0.15942	#DIV/0!	#DIV/0!	#DIV/0!	0.0334247	0.905	1	-0.0715375	0.894	1	-0.315	0.929	1	NA	1	1	NA	1	1	NA	1	1	0	0	0.022	0	0	0	0	0	0	0	0	0	0	0	0	0	0	0	0.046	0
	4930525G20Rik	4930525G20Rik|-|-|13|13 B3|ncRNA	NR_045194	0.162	0.08425	0.1474	0.1585	0.406015	0.270032	0.293042	0.570144	0.555953	0.223	0.405	-0.185647	0.673	0.775	0.156	0.779	0.855	0.586594	0.0768	0.33	0.882	0.124	0.262	0.0434625	0.929382	0.970623	0.211	0.13	0.145	0.046	0.138	0.044	0.109	0.131	0.125	0.198	0.1	0.183	0.194	0.051	0.334	0.196	0.084	0.092	0.399	0.312
	4930526H09Rik	4930526H09Rik|-|-|13 D2.2|13|ncRNA	NR_131194	0	0	0	0	#DIV/0!	0	#DIV/0!	0	NA	1	1	NA	1	1	NA	1	1	NA	1	1	NA	1	1	NA	1	1	0	0	0	0	0	0	0	0	0	0	0	0	0	0	0	0	0	0	0	0.019
	4930526I15Rik	4930526I15Rik|1600027J15Rik|-|9 F4|9|ncRNA	NR_015516	3.73633	2.442	2.741	3.4805	0.957543	0.892218	0.835926	0.772758	0.303592	0.219	0.4	0.0291422	0.923	0.952	0.209	0.47	0.603	0.252826	0.297	0.654	0.525	0.0296	0.0941	-0.234507	0.400461	0.638366	3.055	3.74	4.414	2.198	2.383	2.31	2.877	1.917	1.644	2.623	3.816	3.705	3.222	4.455	3.815	2.881	3.604	2.906	3.902	2.737
	4930526L06Rik	4930526L06Rik|-|-|19|19 A|ncRNA	NR_045317	0	0.0135	0	0	#DIV/0!	#DIV/0!	#DIV/0!	0	-0.142496	0.61	1	NA	1	1	NA	1	1	-0.0216425	0.873	1	-1.47	0.645	1	NA	1	1	0	0	0	0	0	0	0.054	0	0	0	0	0	0	0	0	0	0	0	0	0
	4930527F14Rik	4930527F14Rik|-|-|14|14 C1|ncRNA	NR_045809	0.00933333	0.01225	0.0416	0	#DIV/0!	#DIV/0!	1.01463	0	-0.0629626	0.822	1	-0.582596	0.4	0.535	-0.315	0.929	1	0.1306	0.509	1	-1.12	0.727	1	2.76657	0.279669	1	0	0	0.028	0	0.049	0	0	0	0.073	0	0.041	0.094	0	0	0	0	0	0	0	0
	4930527G23Rik	4930527G23Rik|-|-|18|18 A2|ncRNA	NR_045395	0	0	0	0	#DIV/0!	#DIV/0!	#DIV/0!	#DIV/0!	NA	1	1	NA	1	1	NA	1	1	NA	1	1	NA	1	1	NA	1	1	0	0	0	0	0	0	0	0	0	0	0	0	0	0	0	0	0	0	0	0
	4930528A17Rik	4930528A17Rik|-|-|4|4 A3|ncRNA	NR_028384	0.267333	0.10375	0.0838	0.0923333	0.604827	0.268088	0.286986	0.44822	0.92585	0.0317	0.101	1.05293	0.0578	0.114	-1.36	0.0148	0.0388	-0.0435944	0.899	0.97	-0.201	0.726	0.838	0.119901	0.857224	0.934255	0.216	0.324	0.262	0.092	0.144	0.102	0.077	0.046	0.126	0.155	0.028	0.064	0.062	0.018	0.191	0.102	0.084	0.097	0.442	0.387
	4930528D03Rik	4930528D03Rik|-|-|13|13 B2|ncRNA	NR_045977	0	0	0.0054	0.00483333	#DIV/0!	0	#DIV/0!	#DIV/0!	NA	1	1	-0.361269	0.5	1	1.13	0.75	1	0.0784401	0.563	1	0.619	0.848	1	1.16108	0.7113	1	0	0	0	0	0	0	0	0	0	0.027	0	0	0	0	0	0	0.029	0	0	0.018
	4930528G23Rik	4930528G23Rik|-|-|6|6 G3|ncRNA	NR_131024	0.0156667	0	0	0.00716667	0.313333	#DIV/0!	#DIV/0!	#DIV/0!	0.227456	0.441	1	0.227752	0.676	1	-0.855	0.765	1	NA	1	1	1.52	0.636	1	-0.566126	0.856796	1	0.011	0	0.036	0	0	0	0	0	0	0	0	0	0	0	0.043	0	0	0	0.05	0
	4930528H21Rik	4930528H21Rik|-|-|6|6 A1|ncRNA	NR_131108	0	0	0	0.0125	#DIV/0!	#DIV/0!	#DIV/0!	#DIV/0!	NA	1	1	NA	1	1	1.52	0.668	1	NA	1	1	1.01	0.754	1	-0.0545342	0.986171	1	0	0	0	0	0	0	0	0	0	0	0	0	0	0	0.075	0	0	0	0	0
	4930528P14Rik	4930528P14Rik|-|-|2|2 E4|ncRNA	NR_040516	0	0	0	0	#DIV/0!	#DIV/0!	#DIV/0!	#DIV/0!	NA	1	1	NA	1	1	NA	1	1	NA	1	1	NA	1	1	NA	1	1	0	0	0	0	0	0	0	0	0	0	0	0	0	0	0	0	0	0	0	0
	4930529C04Rik	4930529C04Rik|-|-|3|3 F1|pseudo	NR_033593	0.00166667	0.00125	0.0088	0	#DIV/0!	#DIV/0!	#DIV/0!	#DIV/0!	-0.0193514	0.945	1	-0.615015	0.362	0.498	-0.315	0.929	1	0.168171	0.363	1	-0.583	0.857	1	2.90036	0.317153	1	0.005	0	0	0	0.005	0	0	0	0.03	0.014	0	0	0	0	0	0	0	0	0	0
	4930529K09Rik	4930529K09Rik|4930507G21Rik|-|14|14 E1|ncRNA	NR_040457	0	0	0	0	#DIV/0!	#DIV/0!	#DIV/0!	#DIV/0!	NA	1	1	NA	1	1	NA	1	1	NA	1	1	NA	1	1	NA	1	1	0	0	0	0	0	0	0	0	0	0	0	0	0	0	0	0	0	0	0	0
	4930529L06Rik	4930529L06Rik|-|-|16 C3.3|16|ncRNA	NR_040537	0	0	0	0	#DIV/0!	#DIV/0!	#DIV/0!	#DIV/0!	NA	1	1	NA	1	1	NA	1	1	NA	1	1	NA	1	1	NA	1	1	0	0	0	0	0	0	0	0	0	0	0	0	0	0	0	0	0	0	0	0
	4930532I03Rik	4930532I03Rik|-|-|10|10 D1|ncRNA	NR_131026	0	0	0	0.00183333	#DIV/0!	#DIV/0!	0	#DIV/0!	NA	1	1	NA	1	1	1.13	0.75	1	NA	1	1	0.619	0.848	1	0.335438	0.915169	1	0	0	0	0	0	0	0	0	0	0	0	0	0	0	0.011	0	0	0	0	0
	4930532M18Rik	4930532M18Rik|-|-|1|1 G3|ncRNA	NR_108050	0	0	0	0	#DIV/0!	#DIV/0!	#DIV/0!	#DIV/0!	NA	1	1	NA	1	1	NA	1	1	NA	1	1	NA	1	1	NA	1	1	0	0	0	0	0	0	0	0	0	0	0	0	0	0	0	0	0	0	0	0
	4930533B01Rik	4930533B01Rik|-|-|2|2 E4|ncRNA	NR_040614	0	0.0045	0	0	#DIV/0!	0.204545	#DIV/0!	#DIV/0!	-0.0897196	0.748	1	NA	1	1	NA	1	1	0.00913838	0.946	1	-0.583	0.857	1	NA	1	1	0	0	0	0	0.018	0	0	0	0	0	0	0	0	0	0	0	0	0	0	0.022
	4930533N22Rik	4930533N22Rik|-|-|7|7 D1|ncRNA	NR_131122	0	0.009	0	0.0115	#DIV/0!	0.6	#DIV/0!	1.15	-0.142496	0.61	1	NA	1	1	2.36	0.502	1	-0.0216425	0.873	1	0.27	0.919	1	-0.895415	0.774687	1	0	0	0	0	0	0	0.036	0	0	0	0	0	0	0	0.049	0.02	0	0	0	0.015
	4930533P14Rik	4930533P14Rik|-|-|1|1 D|ncRNA	NR_040478	0	0	0	0	#DIV/0!	#DIV/0!	#DIV/0!	#DIV/0!	NA	1	1	NA	1	1	NA	1	1	NA	1	1	NA	1	1	NA	1	1	0	0	0	0	0	0	0	0	0	0	0	0	0	0	0	0	0	0	0	0
	4930539C22Rik	4930539C22Rik|-|-|3|3 G3|ncRNA	NR_040600	0.015	0.01425	0	0	#DIV/0!	#DIV/0!	#DIV/0!	#DIV/0!	-0.0196564	0.949	1	0.0642719	0.905	1	-1.25	0.719	1	-0.0216425	0.873	1	-1.47	0.645	1	NA	1	1	0	0.045	0	0	0	0	0.057	0	0	0	0	0	0	0	0	0	0	0	0	0
	4930539E08Rik	4930539E08Rik|9130014G02|-|17|17 A3.3|protein-coding	NM_172450	0.57	0.56475	0.5252	0.812333	0.254464	0.15985	0.212116	0.317566	-0.137396	0.716	0.838	-0.23725	0.429	0.562	0.657	0.0537	0.113	0.0527316	0.862	0.958	0.495	0.216	0.382	-0.415551	0.177931	0.408714	0.771	0.516	0.423	0.22	0.482	0.464	1.093	0.256	0.43	0.58	0.689	0.671	0.417	0.462	1.378	0.706	1.114	0.797	2.24	3.533
	4930539J05Rik	4930539J05Rik|8030475D13Rik|-|3|3 G3|ncRNA	NR_030689	0.567333	0.8065	0.8082	0.895667	0.508363	0.487606	0.907071	0.981015	-0.429952	0.398	0.591	-0.66509	0.243	0.37	0.87	0.244	0.375	0.0909239	0.783	0.929	0.207	0.718	0.832	-0.0594277	0.90651	0.960002	0.577	0.087	1.038	0.509	0.832	0.349	1.536	0.787	0.537	0.793	0.96	0.964	1.547	1.143	0.967	0.435	1.007	0.275	1.116	1.654
	4930539M17Rik	4930539M17Rik|-|-|3|3 A1|ncRNA	NR_040597	0.0233333	0	0	0.00733333	0.466667	0	#DIV/0!	0.082397	0.159527	0.569	1	0.13709	0.8	1	-0.848	0.792	1	NA	1	1	1.01	0.754	1	-0.0545342	0.986171	1	0.045	0.025	0	0	0	0	0	0	0	0	0	0	0	0	0.044	0	0	0	0.05	0.079
	4930539N22Rik	4930539N22Rik|-|-|3|3 A1|ncRNA	NR_040598	0	0	0	0.0111667	#DIV/0!	#DIV/0!	#DIV/0!	#DIV/0!	NA	1	1	NA	1	1	1.91	0.588	1	NA	1	1	1.4	0.663	1	-0.447109	0.886755	1	0	0	0	0	0	0	0	0	0	0	0	0	0	0	0.034	0	0.033	0	0	0
	4930540M03Rik	4930540M03Rik|-|-|9|9 A2|ncRNA	NR_040746	0	0	0	0	#DIV/0!	#DIV/0!	#DIV/0!	#DIV/0!	NA	1	1	NA	1	1	NA	1	1	NA	1	1	NA	1	1	NA	1	1	0	0	0	0	0	0	0	0	0	0	0	0	0	0	0	0	0	0	0	0
	4930542C21Rik	4930542C21Rik|-|-|16|16 B3|ncRNA	NR_040565	0	0	0	0	#DIV/0!	#DIV/0!	#DIV/0!	#DIV/0!	NA	1	1	NA	1	1	NA	1	1	NA	1	1	NA	1	1	NA	1	1	0	0	0	0	0	0	0	0	0	0	0	0	0	0	0	0	0	0	0	0
	4930542D17Rik	4930542D17Rik|-|-|16|16 B5|ncRNA	NR_040566	0	0	0	0	#DIV/0!	#DIV/0!	#DIV/0!	#DIV/0!	NA	1	1	NA	1	1	NA	1	1	NA	1	1	NA	1	1	NA	1	1	0	0	0	0	0	0	0	0	0	0	0	0	0	0	0	0	0	0	0	0
	4930543E12Rik	4930543E12Rik|4930545H14Rik|-|7|7 F1|ncRNA	NR_045978	0	0	0.0288	0.00416667	#DIV/0!	0	1.37143	#DIV/0!	NA	1	1	-0.479428	0.399	0.533	1.13	0.75	1	0.101859	0.456	1	0.619	0.848	1	2.55001	0.363241	1	0	0	0	0	0	0	0	0	0	0	0	0.144	0	0	0	0	0.025	0	0	0.016
	4930543N07Rik	4930543N07Rik|-|-|7|7 F4|ncRNA	NR_131022	0	0.006	0	0	#DIV/0!	#DIV/0!	#DIV/0!	#DIV/0!	-0.0897196	0.748	1	NA	1	1	NA	1	1	0.00913838	0.946	1	-0.583	0.857	1	NA	1	1	0	0	0	0	0	0	0.024	0	0	0	0	0	0	0	0	0	0	0	0	0
	4930544D05Rik	4930544D05Rik|-|-|11|11 B3|protein-coding	NM_001145537	0	0	0	0.00966667	#DIV/0!	#DIV/0!	#DIV/0!	#DIV/0!	NA	1	1	NA	1	1	1.13	0.75	1	NA	1	1	0.619	0.848	1	0.335438	0.915169	1	0	0	0	0	0	0	0	0	0	0	0	0	0	0.058	0	0	0	0	0	0
	4930544G11Rik	4930544G11Rik|-|-|6|6 C1|protein-coding	NM_001161773	0	0	0.0166	0	#DIV/0!	0	0.83	#DIV/0!	NA	1	1	-0.426957	0.434	0.567	NA	1	1	0.109969	0.424	1	NA	1	1	2.63055	0.39851	1	0	0	0	0	0	0	0	0	0	0	0.083	0	0	0	0	0	0	0	0	0.062
	4930544M13Rik	4930544M13Rik|-|-|13|13 D2.2|ncRNA	NR_045976	0	0	0	0	#DIV/0!	#DIV/0!	#DIV/0!	#DIV/0!	NA	1	1	NA	1	1	NA	1	1	NA	1	1	NA	1	1	NA	1	1	0	0	0	0	0	0	0	0	0	0	0	0	0	0	0	0	0	0	0	0
	4930545E07Rik	4930545E07Rik|-|-|18|18 A1|ncRNA	NR_045374	0	0	0	0	#DIV/0!	#DIV/0!	#DIV/0!	#DIV/0!	NA	1	1	NA	1	1	NA	1	1	NA	1	1	NA	1	1	NA	1	1	0	0	0	0	0	0	0	0	0	0	0	0	0	0	0	0	0	0	0	0
	4930545H06Rik	4930545H06Rik|-|-|10|10 B5.2|ncRNA	NR_045357	0.00833333	0	0	0.00666667	#DIV/0!	0	#DIV/0!	#DIV/0!	0.0334247	0.905	1	-0.0715375	0.894	1	0.166	0.963	1	NA	1	1	0.619	0.848	1	0.335438	0.915169	1	0.025	0	0	0	0	0	0	0	0	0	0	0	0	0	0	0.04	0	0	0	0.087
	4930545L23Rik	4930545L23Rik|-|-|2|2 F3|ncRNA	NR_040517	0.00566667	0.02775	0.0146	0.0116667	#DIV/0!	#DIV/0!	1.21667	#DIV/0!	-0.732228	0.147	0.305	-0.362197	0.608	0.722	1.14	0.672	0.774	-0.264126	0.354	1	-1.47	0.294	0.472	0.173433	0.924357	1	0	0.017	0	0.047	0.014	0.017	0.033	0.039	0	0.007	0	0.027	0	0	0	0	0.043	0.027	0	0
	4930546C10Rik	4930546C10Rik|-|-|18|18 E2|ncRNA	NR_038051	0.0203333	0.002	0.0014	0.00133333	#DIV/0!	0.105263	#DIV/0!	0.102564	0.405969	0.297	1	0.458326	0.477	0.606	-2.61	0.334	1	0.0327131	0.809	1	-0.102	0.975	1	0.838848	0.789428	1	0.008	0	0.053	0	0.008	0	0	0	0	0.007	0	0	0	0	0.008	0	0	0	0	0.019
	4930546K05Rik	4930546K05Rik|-|-|9|9 A5.1|ncRNA	NR_040754	0.004	0.0145	0.0094	0.0136667	#DIV/0!	#DIV/0!	1.175	#DIV/0!	-0.335217	0.426	1	-0.207674	0.755	0.839	1.99	0.265	0.398	-0.0941564	0.66	1	-0.081	0.954	0.976	-1.11305	0.460267	1	0	0	0.012	0	0.046	0.012	0	0.028	0	0	0	0.019	0.005	0.043	0.005	0	0.01	0.019	0	0
	4930547E08Rik	4930547E08Rik|-|-|2|2 E2|ncRNA	NR_040514	0	0.01275	0.0396	0.0095	#DIV/0!	#DIV/0!	0.72	#DIV/0!	-0.0897196	0.748	1	-0.384754	0.473	1	1.13	0.75	1	0.0605044	0.682	1	-0.102	0.975	1	1.87709	0.547549	1	0	0	0	0	0	0	0.051	0	0.198	0	0	0	0	0	0	0.057	0	0	0	0
	4930547E14Rik	4930547E14Rik|-|-|16|16 C1.3|ncRNA	NR_040564	0	0	0	0	#DIV/0!	#DIV/0!	#DIV/0!	#DIV/0!	NA	1	1	NA	1	1	NA	1	1	NA	1	1	NA	1	1	NA	1	1	0	0	0	0	0	0	0	0	0	0	0	0	0	0	0	0	0	0	0	0
	4930548G14Rik	4930548G14Rik|-|-|15|15 B3.3|ncRNA	NR_045811	0	0	0	0	#DIV/0!	#DIV/0!	#DIV/0!	#DIV/0!	NA	1	1	NA	1	1	NA	1	1	NA	1	1	NA	1	1	NA	1	1	0	0	0	0	0	0	0	0	0	0	0	0	0	0	0	0	0	0	0	0
	4930548H24Rik	4930548H24Rik|AI427865|-|5|5 B1|protein-coding	NM_026296	0.051	0.0095	0	0.00866667	1.7	0.59375	#DIV/0!	#DIV/0!	0.439064	0.317	1	0.686065	0.284	0.417	-2.09	0.29	0.425	-0.0300574	0.825	1	-0.0416	0.988	1	-0.677541	0.828892	1	0.081	0	0.072	0	0.038	0	0	0	0	0	0	0	0.026	0	0.026	0	0	0	0.03	0.016
	4930548J01Rik	4930548J01Rik|1700113K09Rik|-|17|17 A1|ncRNA	NR_045462	0	0	0	0	0	#DIV/0!	#DIV/0!	#DIV/0!	NA	1	1	NA	1	1	NA	1	1	NA	1	1	NA	1	1	NA	1	1	0	0	0	0	0	0	0	0	0	0	0	0	0	0	0	0	0	0	0.058	0
	4930548K13Rik	4930548K13Rik|-|-|4|4 A3|ncRNA	NR_040656	0	0	0	0	#DIV/0!	#DIV/0!	#DIV/0!	#DIV/0!	NA	1	1	NA	1	1	NA	1	1	NA	1	1	NA	1	1	NA	1	1	0	0	0	0	0	0	0	0	0	0	0	0	0	0	0	0	0	0	0	0
	4930549C01Rik	4930549C01Rik|-|-|4|4 D3|protein-coding	NM_026300	0.0206667	0	0	0	0.322917	#DIV/0!	#DIV/0!	#DIV/0!	0.103793	0.71	1	0.0723736	0.893	1	-1.31	0.707	1	NA	1	1	NA	1	1	NA	1	1	0	0	0.062	0	0	0	0	0	0	0	0	0	0	0	0	0	0	0	0.064	0
	4930549C15Rik	4930549C15Rik|-|-|12|12 A2|ncRNA	NR_130981	0.01	0.0055	0	0	#DIV/0!	#DIV/0!	#DIV/0!	#DIV/0!	0.0390342	0.889	1	0.0372416	0.945	1	-1.08	0.759	1	0.00913838	0.946	1	-0.583	0.857	1	NA	1	1	0.03	0	0	0	0	0	0.022	0	0	0	0	0	0	0	0	0	0	0	0	0
	4930549G23Rik	4930549G23Rik|-|-|18|18 E1|ncRNA	NR_045376	5.09033	3.227	2.6672	2.65033	0.850373	0.471026	0.461533	0.581213	0.430397	0.0715	0.183	0.536915	0.0825	0.154	-0.749	0.0389	0.087	-0.0858053	0.739	0.916	-0.291	0.385	0.562	0.175006	0.623465	0.800562	5.702	4.776	4.793	3.135	3.644	2.633	3.496	2.541	1.941	4.497	2.223	2.134	3.803	1.181	1.698	3.209	3.344	2.667	5.986	6.851
	4930550C14Rik	4930550C14Rik|AU017961|-|9|9 A5.3|protein-coding	NM_029247	0.401	0.40575	0.5032	0.280167	2.88489	2.48926	2.62083	2.27778	-0.21031	0.609	0.764	-0.565988	0.195	0.312	-0.302	0.555	0.68	0.257106	0.415	0.752	-0.559	0.232	0.401	0.934897	0.0379273	0.157045	0.358	0.543	0.302	0.554	0.497	0.283	0.289	0.876	0.434	0.588	0.34	0.278	0.443	0.123	0.196	0.377	0.291	0.251	0.139	0.163
	4930550C17Rik	4930550C17Rik|-|-|13|13 B1|ncRNA	NR_131023	0	0	0	0	#DIV/0!	#DIV/0!	0	#DIV/0!	NA	1	1	NA	1	1	NA	1	1	NA	1	1	NA	1	1	NA	1	1	0	0	0	0	0	0	0	0	0	0	0	0	0	0	0	0	0	0	0	0
	4930550L24Rik	4930550L24Rik|mage-k1|-|X|X A6|protein-coding	NM_023774	0	0	0	0	#DIV/0!	#DIV/0!	#DIV/0!	#DIV/0!	NA	1	1	NA	1	1	NA	1	1	NA	1	1	NA	1	1	NA	1	1	0	0	0	0	0	0	0	0	0	0	0	0	0	0	0	0	0	0	0	0
	4930552N02Rik	4930552N02Rik|-|-|4|4 B2|ncRNA	NR_040661	0	0	0	0	#DIV/0!	#DIV/0!	#DIV/0!	#DIV/0!	NA	1	1	NA	1	1	NA	1	1	NA	1	1	NA	1	1	NA	1	1	0	0	0	0	0	0	0	0	0	0	0	0	0	0	0	0	0	0	0	0
	4930552P12Rik	4930552P12Rik|-|-|19|19 D2|ncRNA	NR_045318	0.0313333	0.0475	0.0266	0.0353333	0.22871	0.896226	1.10833	0.447257	-0.344549	0.52	0.695	-0.139517	0.853	0.908	0.43	0.733	0.821	-0.125345	0.697	0.902	-0.337	0.707	0.824	-0.112099	0.917201	0.965064	0.069	0	0.025	0.023	0.036	0.087	0.044	0	0	0.046	0.06	0.027	0.023	0.106	0.044	0.025	0.014	0	0.137	0.053
	4930553C11Rik	4930553C11Rik|-|-|11|11 A5|ncRNA	NR_126439	0	0	0	0	#DIV/0!	#DIV/0!	#DIV/0!	0	NA	1	1	NA	1	1	NA	1	1	NA	1	1	NA	1	1	NA	1	1	0	0	0	0	0	0	0	0	0	0	0	0	0	0	0	0	0	0	0	0
	4930553E22Rik	4930553E22Rik|-|-|16|16 C3.3|ncRNA	NR_040567	0.0476667	0.12075	0.0122	0.0095	#DIV/0!	#DIV/0!	0.110909	#DIV/0!	-0.485003	0.332	0.524	0.071007	0.897	1	-1.58	0.643	1	-0.318614	0.195	1	-3.23	0.0389	0.116	1.16108	0.7113	1	0.143	0	0	0.217	0.134	0.081	0.051	0	0	0.061	0	0	0	0	0	0.057	0	0	0	0
	4930553J12Rik	4930553J12Rik|-|-|16|16 C3.3|ncRNA	NR_138570	0	0	0	0	#DIV/0!	#DIV/0!	#DIV/0!	#DIV/0!	NA	1	1	NA	1	1	NA	1	1	NA	1	1	NA	1	1	NA	1	1	0	0	0	0	0	0	0	0	0	0	0	0	0	0	0	0	0	0	0	0
	4930554C24Rik	4930554C24Rik|-|-|9|9 E3.1|ncRNA	NR_040739	0	0	0	0	0	#DIV/0!	#DIV/0!	#DIV/0!	NA	1	1	NA	1	1	NA	1	1	NA	1	1	NA	1	1	NA	1	1	0	0	0	0	0	0	0	0	0	0	0	0	0	0	0	0	0	0	0.079	0
	4930554G24Rik	4930554G24Rik|-|-|11|11 A2|ncRNA	NR_131011	0	0	0	0	#DIV/0!	#DIV/0!	#DIV/0!	#DIV/0!	NA	1	1	NA	1	1	NA	1	1	NA	1	1	NA	1	1	NA	1	1	0	0	0	0	0	0	0	0	0	0	0	0	0	0	0	0	0	0	0	0
	4930554H23Rik	4930554H23Rik|-|-|7|7 C|ncRNA	NR_131089	0	0	0.0024	0	#DIV/0!	#DIV/0!	0.2	#DIV/0!	NA	1	1	-0.296912	0.579	1	NA	1	1	0.0614787	0.649	1	NA	1	1	1.51548	0.6292	1	0	0	0	0	0	0	0	0	0	0	0.012	0	0	0	0	0	0	0	0	0
	4930554I06Rik	4930554I06Rik|-|-|19|19 B|ncRNA	NR_126458	0	0	0	0	#DIV/0!	#DIV/0!	#DIV/0!	#DIV/0!	NA	1	1	NA	1	1	NA	1	1	NA	1	1	NA	1	1	NA	1	1	0	0	0	0	0	0	0	0	0	0	0	0	0	0	0	0	0	0	0	0
	4930555B11Rik	4930555B11Rik|-|-|2|2 C1.1|ncRNA	NR_040633	0	0	0	0	0	#DIV/0!	0	#DIV/0!	NA	1	1	NA	1	1	NA	1	1	NA	1	1	NA	1	1	NA	1	1	0	0	0	0	0	0	0	0	0	0	0	0	0	0	0	0	0	0	0.028	0
	4930555B12Rik	4930555B12Rik|-|-|X|X E1|ncRNA	NR_130989	0	0	0	0	#DIV/0!	#DIV/0!	#DIV/0!	#DIV/0!	NA	1	1	NA	1	1	NA	1	1	NA	1	1	NA	1	1	NA	1	1	0	0	0	0	0	0	0	0	0	0	0	0	0	0	0	0	0	0	0	0
	4930555G01Rik	4930555G01Rik|-|-|14|14 A1|protein-coding	NM_175393	0	0	0	0	#DIV/0!	#DIV/0!	#DIV/0!	#DIV/0!	NA	1	1	NA	1	1	NA	1	1	NA	1	1	NA	1	1	NA	1	1	0	0	0	0	0	0	0	0	0	0	0	0	0	0	0	0	0	0	0	0
	4930555G21Rik	4930555G21Rik|-|-|13|13 B1|ncRNA	NR_131010	0	0	0	0	#DIV/0!	#DIV/0!	#DIV/0!	#DIV/0!	NA	1	1	NA	1	1	NA	1	1	NA	1	1	NA	1	1	NA	1	1	0	0	0	0	0	0	0	0	0	0	0	0	0	0	0	0	0	0	0	0
	4930555K05Rik	4930555K05Rik|-|-|13|13 C1|ncRNA	NR_126459	0	0	0	0	#DIV/0!	#DIV/0!	#DIV/0!	#DIV/0!	NA	1	1	NA	1	1	NA	1	1	NA	1	1	NA	1	1	NA	1	1	0	0	0	0	0	0	0	0	0	0	0	0	0	0	0	0	0	0	0	0
	4930556C24Rik	4930556C24Rik|-|-|16|16 C3.3|ncRNA	NR_040506	0	0	0	0	#DIV/0!	#DIV/0!	#DIV/0!	#DIV/0!	NA	1	1	NA	1	1	NA	1	1	NA	1	1	NA	1	1	NA	1	1	0	0	0	0	0	0	0	0	0	0	0	0	0	0	0	0	0	0	0	0
	4930556G01Rik	4930556G01Rik|-|-|4|4 A5|ncRNA	NR_040655	0	0	0	0	#DIV/0!	#DIV/0!	#DIV/0!	#DIV/0!	NA	1	1	NA	1	1	NA	1	1	NA	1	1	NA	1	1	NA	1	1	0	0	0	0	0	0	0	0	0	0	0	0	0	0	0	0	0	0	0	0
	4930556J02Rik	4930556J02Rik|-|-|14|14 D1|ncRNA	NR_045714	0	0	0	0	#DIV/0!	#DIV/0!	#DIV/0!	#DIV/0!	NA	1	1	NA	1	1	NA	1	1	NA	1	1	NA	1	1	NA	1	1	0	0	0	0	0	0	0	0	0	0	0	0	0	0	0	0	0	0	0	0
	4930556L07Rik	4930556L07Rik|1700020P01Rik|4930593I08Rik|-|2|2 G3|ncRNA	NR_138568	0	0	0	0	#DIV/0!	#DIV/0!	#DIV/0!	#DIV/0!	NA	1	1	NA	1	1	NA	1	1	NA	1	1	NA	1	1	NA	1	1	0	0	0	0	0	0	0	0	0	0	0	0	0	0	0	0	0	0	0	0
	4930556M19Rik	4930556M19Rik|1700009D01Rik|C130022M03Rik|-|15|15 A1|ncRNA	NR_045065	0.0553333	0.058	0.082	0.0696667	0.517134	0.47541	0.796117	0.419679	-0.128565	0.808	0.892	-0.663063	0.317	0.454	0.493	0.55	0.677	0.300691	0.378	0.726	0.28	0.692	0.815	0.413244	0.568074	0.761489	0.029	0.075	0.062	0.049	0.036	0.065	0.082	0.098	0	0.09	0.119	0.103	0.066	0	0.074	0.139	0.071	0.068	0.107	0.122
	4930556N09Rik	4930556N09Rik|-|-|10|10 C3|ncRNA	NR_045358	0	0	0	0	#DIV/0!	#DIV/0!	#DIV/0!	#DIV/0!	NA	1	1	NA	1	1	NA	1	1	NA	1	1	NA	1	1	NA	1	1	0	0	0	0	0	0	0	0	0	0	0	0	0	0	0	0	0	0	0	0
	4930556N13Rik	4930556N13Rik|-|-|11|11 C|ncRNA	NR_126433	0	0.0065	0	0	#DIV/0!	#DIV/0!	#DIV/0!	#DIV/0!	-0.0897196	0.748	1	NA	1	1	NA	1	1	0.00913838	0.946	1	-0.583	0.857	1	NA	1	1	0	0	0	0	0	0	0.026	0	0	0	0	0	0	0	0	0	0	0	0	0
	4930557F10Rik	4930557F10Rik|-|-|13|13 A3.1|ncRNA	NR_126443	0	0	0	0	#DIV/0!	#DIV/0!	#DIV/0!	#DIV/0!	NA	1	1	NA	1	1	NA	1	1	NA	1	1	NA	1	1	NA	1	1	0	0	0	0	0	0	0	0	0	0	0	0	0	0	0	0	0	0	0	0
	4930557J02Rik	4930557J02Rik|-|-|5|5 B2|ncRNA	NR_040703	0.006	0	0	0	#DIV/0!	0	#DIV/0!	#DIV/0!	0.0334247	0.905	1	-0.0715375	0.894	1	-0.315	0.929	1	NA	1	1	NA	1	1	NA	1	1	0.018	0	0	0	0	0	0	0	0	0	0	0	0	0	0	0	0	0	0	0.041
	4930557K07Rik	4930557K07Rik|-|-|6|6 F2|ncRNA	NR_130997	0.175667	0.052	0.1544	0.1275	0.164174	0.139785	1.88293	0.754438	0.333476	0.469	1	-0.0818432	0.912	0.945	-0.354	0.812	0.877	0.177228	0.429	1	0.97	0.515	0.679	0.557685	0.705079	1	0.107	0.42	0	0.108	0.1	0	0	0.273	0	0	0.499	0	0	0	0.103	0.172	0.299	0.191	1.07	0.372
	4930558C23Rik	4930558C23Rik|-|-|3|3 F2.1|ncRNA	NR_015490	0	0	0	0	#DIV/0!	#DIV/0!	#DIV/0!	#DIV/0!	NA	1	1	NA	1	1	NA	1	1	NA	1	1	NA	1	1	NA	1	1	0	0	0	0	0	0	0	0	0	0	0	0	0	0	0	0	0	0	0	0
	4930558F17Rik	4930558F17Rik|-|-|5 A1|5|ncRNA	NR_126451	0	0	0	0	#DIV/0!	#DIV/0!	#DIV/0!	#DIV/0!	NA	1	1	NA	1	1	NA	1	1	NA	1	1	NA	1	1	NA	1	1	0	0	0	0	0	0	0	0	0	0	0	0	0	0	0	0	0	0	0	0
	4930558G05Rik	4930558G05Rik|-|-|X|X E3|ncRNA	NR_045441	0	0	0	0	#DIV/0!	#DIV/0!	#DIV/0!	#DIV/0!	NA	1	1	NA	1	1	NA	1	1	NA	1	1	NA	1	1	NA	1	1	0	0	0	0	0	0	0	0	0	0	0	0	0	0	0	0	0	0	0	0
	4930558J18Rik	4930558J18Rik|-|-|1|1 C1.3|ncRNA	NR_037999	0.230333	0.08275	0	0.0195	10.9683	2.58594	0	#DIV/0!	0.951485	0.0362	0.111	3.37487	3.17e-06	1.73e-05	-3.13	0.00237	0.00798	-0.891988	0.00297	0.0385	-1.89	0.0692	0.175	-2.27042	0.335255	1	0.261	0.178	0.252	0.114	0.088	0.063	0.066	0	0	0	0	0	0.082	0	0.018	0	0.017	0	0.021	0.032
	4930558K02Rik	4930558K02Rik|-|-|1|1 H2.1|protein-coding	NM_001204904	0.0136667	0	0.0068	0.00316667	#DIV/0!	0	0.111475	#DIV/0!	0.103793	0.71	1	-0.0735229	0.895	1	-0.714	0.838	1	0.0784401	0.563	1	0.619	0.848	1	1.16108	0.7113	1	0.02	0	0.021	0	0	0	0	0	0	0.034	0	0	0	0	0.019	0	0	0	0	0.023
	4930559C10Rik	4930559C10Rik|-|-|12|12 D3|ncRNA	NR_126436	0.01	0	0	0	#DIV/0!	#DIV/0!	#DIV/0!	#DIV/0!	0.0334247	0.905	1	-0.0715375	0.894	1	-0.315	0.929	1	NA	1	1	NA	1	1	NA	1	1	0.03	0	0	0	0	0	0	0	0	0	0	0	0	0	0	0	0	0	0	0
	4930562C15Rik	4930562C15Rik|-|-|16 A1|16 2.47 cM|protein-coding	NM_030192	0.00766667	0	0.0036	0	0.22549	0	#DIV/0!	#DIV/0!	0.207181	0.464	1	0.132466	0.821	0.885	-2.26	0.508	1	0.0614787	0.649	1	NA	1	1	1.51548	0.6292	1	0	0.023	0	0	0	0	0	0	0	0	0	0.018	0	0	0	0	0	0	0.034	0.017
	4930562F07Rik	4930562F07Rik|-|-|1|1 H1|ncRNA	NR_038031	0.95	0.96575	0.9444	0.832333	3.36879	2.19489	2.2014	2.19035	-0.0498077	0.895	0.945	-0.340968	0.36	0.496	0.0833	0.876	0.921	0.247599	0.375	0.724	0.0244	0.959	0.978	0.275275	0.525532	0.731004	1.138	1.139	0.573	0.926	1.212	1.148	0.577	0.776	0.917	1.477	0.828	0.724	1.81	0.35	0.782	0.857	0.472	0.723	0.282	0.44
	4930563D23Rik	4930563D23Rik|-|-|16|16 C4|protein-coding	NM_029252	0	0.00325	0	0	#DIV/0!	#DIV/0!	#DIV/0!	#DIV/0!	-0.142496	0.61	1	NA	1	1	NA	1	1	-0.01273	0.925	1	-1.12	0.727	1	NA	1	1	0	0	0	0	0.013	0	0	0	0	0	0	0	0	0	0	0	0	0	0	0
	4930563E18Rik	4930563E18Rik|-|-|18|18 A1|ncRNA	NR_045379	0.0296667	0.103	0.0966	0.041	#DIV/0!	#DIV/0!	1.27105	4.1	-0.981767	0.0665	0.174	-1.18137	0.107	0.192	0.562	0.699	0.795	0.00155177	0.996	0.998	-1.38	0.123	0.262	1.42315	0.164746	0.390654	0.049	0	0.04	0.075	0.081	0.168	0.088	0.126	0.206	0.011	0.096	0.044	0.024	0	0.024	0.06	0.138	0	0	0
	4930563E22Rik	4930563E22Rik|-|-|11|11 B4|protein-coding	NM_001163728	0.37	0.3745	0.3248	0.367667	0.364173	0.621061	0.553322	0.588267	-0.175595	0.543	0.713	-0.0692447	0.867	0.916	0.193	0.639	0.751	-0.0852224	0.778	0.928	-0.00654	0.985	0.993	-0.10557	0.806153	0.906823	0.335	0.37	0.405	0.305	0.363	0.419	0.411	0.265	0.177	0.159	0.342	0.681	0.317	0.571	0.563	0.251	0.205	0.299	1.016	0.603
	4930563F08Rik	4930563F08Rik|-|-|5|5 G2|ncRNA	NR_040704	0	0	0	0	#DIV/0!	#DIV/0!	#DIV/0!	#DIV/0!	NA	1	1	NA	1	1	NA	1	1	NA	1	1	NA	1	1	NA	1	1	0	0	0	0	0	0	0	0	0	0	0	0	0	0	0	0	0	0	0	0
	4930563H07Rik	4930563H07Rik|-|-|6|6 B2.3|ncRNA	NR_126454	0	0	0	0	#DIV/0!	#DIV/0!	#DIV/0!	#DIV/0!	NA	1	1	NA	1	1	NA	1	1	NA	1	1	NA	1	1	NA	1	1	0	0	0	0	0	0	0	0	0	0	0	0	0	0	0	0	0	0	0	0
	4930563M20Rik	4930563M20Rik|-|-|8|8 E1|ncRNA	NR_046193	0	0	0	0	#DIV/0!	#DIV/0!	#DIV/0!	#DIV/0!	NA	1	1	NA	1	1	NA	1	1	NA	1	1	NA	1	1	NA	1	1	0	0	0	0	0	0	0	0	0	0	0	0	0	0	0	0	0	0	0	0
	4930563M21Rik	4930563M21Rik|Rfpl3s|-|9|9 B|protein-coding	NM_183111	0	0	0	0.0065	#DIV/0!	#DIV/0!	#DIV/0!	#DIV/0!	NA	1	1	NA	1	1	1.13	0.75	1	NA	1	1	0.619	0.848	1	0.335438	0.915169	1	0	0	0	0	0	0	0	0	0	0	0	0	0	0	0	0.039	0	0	0	0
	4930564C03Rik	4930564C03Rik|-|-|17|17 B3|protein-coding	NM_029257	0	0	0	0	#DIV/0!	#DIV/0!	#DIV/0!	#DIV/0!	NA	1	1	NA	1	1	NA	1	1	NA	1	1	NA	1	1	NA	1	1	0	0	0	0	0	0	0	0	0	0	0	0	0	0	0	0	0	0	0	0
	4930564D02Rik	4930564D02Rik|-|-|3|3 F2.2|protein-coding	NM_029228	0	0	0	0	#DIV/0!	#DIV/0!	#DIV/0!	#DIV/0!	NA	1	1	NA	1	1	NA	1	1	NA	1	1	NA	1	1	NA	1	1	0	0	0	0	0	0	0	0	0	0	0	0	0	0	0	0	0	0	0	0
	4930565D16Rik	4930565D16Rik|-|-|3|3 F1|ncRNA	NR_040752	0	0	0	0	#DIV/0!	#DIV/0!	#DIV/0!	#DIV/0!	NA	1	1	NA	1	1	NA	1	1	NA	1	1	NA	1	1	NA	1	1	0	0	0	0	0	0	0	0	0	0	0	0	0	0	0	0	0	0	0	0
	4930565N06Rik	4930565N06Rik|4930428L02Rik|-|16|16 B3|ncRNA	NR_040476	0.00266667	0.02025	0.0108	0.0131667	0.0189125	0.243976	0.177049	#DIV/0!	-0.514263	0.244	1	-0.678398	0.33	0.466	2.21	0.346	0.483	-0.0683166	0.787	1	-0.626	0.683	0.808	0.213396	0.891688	1	0.008	0	0	0	0.007	0.018	0.056	0	0.022	0.02	0.012	0	0	0	0.038	0.026	0.015	0	0.141	0.083
	4930567H12Rik	4930567H12Rik|4930579P07Rik|-|8|8 E2|ncRNA	NR_015535	0.029	0.0875	0.035	0	#DIV/0!	3.80435	#DIV/0!	0	-0.564571	0.267	0.456	0.0116264	0.986	0.992	-2.31	0.497	1	-0.315138	0.249	1	-4.07	0.0132	0.0511	2.35039	0.431712	1	0	0	0.087	0.143	0.132	0.046	0.029	0.103	0	0	0	0.072	0	0	0	0	0	0	0	0.023
	4930567H17Rik	4930567H17Rik|-|-|X|X A7.2|protein-coding	NM_001033807	0	0	0	0	#DIV/0!	#DIV/0!	#DIV/0!	#DIV/0!	NA	1	1	NA	1	1	NA	1	1	NA	1	1	NA	1	1	NA	1	1	0	0	0	0	0	0	0	0	0	0	0	0	0	0	0	0	0	0	0	0
	4930567J20Rik	4930567J20Rik|-|-|16|16 C3.1|ncRNA	NR_040576	0	0	0	0	#DIV/0!	#DIV/0!	#DIV/0!	#DIV/0!	NA	1	1	NA	1	1	NA	1	1	NA	1	1	NA	1	1	NA	1	1	0	0	0	0	0	0	0	0	0	0	0	0	0	0	0	0	0	0	0	0
	4930567K12Rik	4930567K12Rik|-|-|7|7 E1|ncRNA	NR_131016	0	0.01225	0.0248	0	#DIV/0!	0.35	0.53913	#DIV/0!	-0.14514	0.606	1	-0.61463	0.316	0.452	NA	1	1	0.120189	0.558	1	-1.39	0.665	1	2.85164	0.339554	1	0	0	0	0.015	0	0.034	0	0	0	0	0.07	0.054	0	0	0	0	0	0	0	0.035
	4930567K20Rik	4930567K20Rik|1700038H22Rik|-|10|10 A1|ncRNA	NR_046010	0	0.046	0	0	#DIV/0!	#DIV/0!	#DIV/0!	#DIV/0!	-0.239099	0.427	1	NA	1	1	NA	1	1	-0.0505882	0.711	1	-1.99	0.53	1	NA	1	1	0	0	0	0	0.122	0	0.062	0	0	0	0	0	0	0	0	0	0	0	0	0
	4930568D16Rik	4930568D16Rik|Ggta1l1|-|2|2 B|protein-coding	NM_029463	0	0	0	0	#DIV/0!	#DIV/0!	#DIV/0!	#DIV/0!	NA	1	1	NA	1	1	NA	1	1	NA	1	1	NA	1	1	NA	1	1	0	0	0	0	0	0	0	0	0	0	0	0	0	0	0	0	0	0	0	0
	4930568E12Rik	4930568E12Rik|-|-|9|9 A1|ncRNA	NR_040755	0	0	0	0	#DIV/0!	#DIV/0!	#DIV/0!	#DIV/0!	NA	1	1	NA	1	1	NA	1	1	NA	1	1	NA	1	1	NA	1	1	0	0	0	0	0	0	0	0	0	0	0	0	0	0	0	0	0	0	0	0
	4930568G15Rik	4930568G15Rik|-|-|1|1 H2.2|ncRNA	NR_040480	0.00633333	0.0045	0	0.00316667	0.147287	0.204545	#DIV/0!	#DIV/0!	-0.0193514	0.945	1	-0.0715375	0.894	1	0.166	0.963	1	0.00913838	0.946	1	-0.102	0.975	1	0.335438	0.915169	1	0.019	0	0	0	0.018	0	0	0	0	0	0	0	0	0	0.019	0	0	0	0.043	0.022
	4930570G19Rik	4930570G19Rik|C630015G22|-|3|3 H4|ncRNA	NR_040400	1.78567	2.56925	3.1894	3.74883	0.684163	1.26005	1.34858	1.56071	-0.62019	0.0717	0.184	-1.07356	0.00144	0.00456	1.34	0.0205	0.0509	0.371828	0.103	0.391	0.628	0.195	0.358	-0.184482	0.675067	0.832437	0.92	2.542	1.895	2.296	2.043	2.72	3.218	3.704	2.721	2.417	3.217	3.888	2.733	9.711	2.748	2.203	2.656	2.442	2.61	2.039
	4930571K23Rik	4930571K23Rik|AI428146|-|7|7 F3|protein-coding	NM_001145759	0	0	0	0	#DIV/0!	#DIV/0!	#DIV/0!	#DIV/0!	NA	1	1	NA	1	1	NA	1	1	NA	1	1	NA	1	1	NA	1	1	0	0	0	0	0	0	0	0	0	0	0	0	0	0	0	0	0	0	0	0
	4930571O06Rik	4930571O06Rik|-|-|8|8 E1|ncRNA	NR_110476	0	0	0	0	#DIV/0!	#DIV/0!	#DIV/0!	#DIV/0!	NA	1	1	NA	1	1	NA	1	1	NA	1	1	NA	1	1	NA	1	1	0	0	0	0	0	0	0	0	0	0	0	0	0	0	0	0	0	0	0	0
	4930572K03Rik	4930572K03Rik|-|-|5|5 G1.2|ncRNA	NR_045371	0	0	0	0	0	#DIV/0!	#DIV/0!	#DIV/0!	NA	1	1	NA	1	1	NA	1	1	NA	1	1	NA	1	1	NA	1	1	0	0	0	0	0	0	0	0	0	0	0	0	0	0	0	0	0	0	0.046	0
	4930572O03Rik	4930572O03Rik|-|-|5|5 A2|pseudo	NR_073011	0	0	0	0	#DIV/0!	#DIV/0!	#DIV/0!	#DIV/0!	NA	1	1	NA	1	1	NA	1	1	NA	1	1	NA	1	1	NA	1	1	0	0	0	0	0	0	0	0	0	0	0	0	0	0	0	0	0	0	0	0
	4930572O13Rik	4930572O13Rik|-|-|14|14 A3|ncRNA	NR_045718	0	0.032	0.0206	0.012	0	0.184971	0.17913	0.307692	-0.278719	0.384	1	-0.414031	0.444	1	1.8	0.611	1	0.00241363	0.99	1	-1.11	0.674	1	1.12023	0.688463	1	0	0	0	0	0.093	0	0.035	0	0	0.064	0.039	0	0	0	0.072	0	0	0	0.11	0.173
	4930573O16Rik	4930573O16Rik|-|-|2|2 C1.1|ncRNA	NR_040620	0.0316667	0.017	0	0	#DIV/0!	0.309091	0	0	0.0390342	0.889	1	0.0372416	0.945	1	-1.08	0.759	1	0.00913838	0.946	1	-0.583	0.857	1	NA	1	1	0.095	0	0	0	0	0	0.068	0	0	0	0	0	0	0	0	0	0	0	0	0.055
	4930577N17Rik	4930577N17Rik|-|-|3|3 C|ncRNA	NR_073429	0.330667	0.29975	0.2326	0.266833	0.555742	0.636412	0.405934	0.619103	-0.0615334	0.883	0.938	0.114817	0.798	0.869	-0.118	0.789	0.862	-0.137827	0.672	0.89	-0.199	0.646	0.782	0.00207292	0.996068	0.998741	0.278	0.313	0.401	0.354	0.327	0.105	0.413	0.237	0.162	0.309	0.289	0.166	0.284	0.367	0.247	0.299	0.238	0.166	0.595	0.471
	4930578C19Rik	4930578C19Rik|-|-|X|X A1.3|protein-coding	NR_132634	0.0263333	0.03975	0.0314	0.006	0.0554386	0.174342	0.232593	0.0606061	-0.422247	0.431	0.62	-0.38514	0.608	0.722	-1.94	0.241	0.372	-0.0359453	0.904	0.971	-2.75	0.0369	0.111	2.60859	0.101507	1	0.038	0.006	0.035	0.1	0.031	0.012	0.016	0	0	0.009	0.128	0.02	0	0	0.026	0	0.01	0	0.475	0.228
	4930578E11Rik	4930578E11Rik|-|-|18|18 A2|ncRNA	NR_045391	0	0.00425	0	0.0055	#DIV/0!	#DIV/0!	#DIV/0!	#DIV/0!	-0.142496	0.61	1	NA	1	1	1.66	0.638	1	-0.01273	0.925	1	-0.107	0.973	1	-0.199571	0.949398	1	0	0	0	0	0.017	0	0	0	0	0	0	0	0	0	0	0	0.033	0	0	0
	4930578I06Rik	4930578I06Rik|AI429111|-|14|14 D1|protein-coding	NM_026359	0	0.0105	0	0	#DIV/0!	#DIV/0!	#DIV/0!	#DIV/0!	-0.0897196	0.748	1	NA	1	1	NA	1	1	0.00913838	0.946	1	-0.583	0.857	1	NA	1	1	0	0	0	0	0	0.042	0	0	0	0	0	0	0	0	0	0	0	0	0	0
	4930578M01Rik	4930578M01Rik|3010001K12Rik|-|15|15 F1|ncRNA	NR_045991	0.134333	0.1085	0.1794	0.292667	0.123924	1.10714	0.786842	0.564994	0.122988	0.818	0.898	-0.633454	0.334	0.47	1.33	0.05	0.106	0.40317	0.228	0.579	1.57	0.0223	0.0764	-0.446863	0.484313	0.70181	0.148	0.095	0.16	0.022	0.099	0.192	0.121	0	0.059	0.272	0.264	0.302	0.311	0.335	0.531	0.273	0.079	0.227	1.084	0.098
	4930578N18Rik	4930578N18Rik|-|-|16|16 C3.1|ncRNA	NR_040575	0	0	0	0	#DIV/0!	#DIV/0!	#DIV/0!	#DIV/0!	NA	1	1	NA	1	1	NA	1	1	NA	1	1	NA	1	1	NA	1	1	0	0	0	0	0	0	0	0	0	0	0	0	0	0	0	0	0	0	0	0
	4930579F01Rik	4930579F01Rik|-|-|3|3 G3|protein-coding	NM_001163386	0.0326667	0	0	0	0.604938	0	0	#DIV/0!	0.402539	0.248	1	0.434209	0.456	1	-3.09	0.346	1	NA	1	1	NA	1	1	NA	1	1	0.084	0.014	0	0	0	0	0	0	0	0	0	0	0	0	0	0	0	0	0.054	0.042
	4930579G18Rik	4930579G18Rik|-|-|14|14 C2|ncRNA	NR_038053	0.942	0.556	0.451	0.584167	0.292728	0.344272	0.530588	1.44239	0.533711	0.111	0.252	0.62497	0.105	0.188	-0.504	0.206	0.329	-0.0615969	0.844	0.953	0.085	0.834	0.908	-0.175844	0.681585	0.835485	0.945	0.975	0.906	0.28	0.616	0.655	0.673	0.134	0.329	0.699	0.389	0.704	0.733	0.208	1.04	0.423	0.515	0.586	3.218	1.615
	4930579G24Rik	4930579G24Rik|-|-|3|3 E3|protein-coding	NM_029482	0.960333	0.87125	0.9332	0.634333	1.30303	1.18861	1.68144	1.03144	-0.0653661	0.819	0.899	-0.250748	0.38	0.515	-0.457	0.215	0.34	0.164699	0.506	0.809	-0.526	0.124	0.264	0.732206	0.0231473	0.114103	1.118	0.798	0.965	1.117	0.84	0.683	0.845	1.093	0.975	0.634	1.061	0.903	0.476	0.173	0.676	0.721	0.944	0.816	0.737	0.733
	4930579H20Rik	4930579H20Rik|-|-|10|10 A4|ncRNA	NR_131034	0	0	0	0	#DIV/0!	#DIV/0!	#DIV/0!	#DIV/0!	NA	1	1	NA	1	1	NA	1	1	NA	1	1	NA	1	1	NA	1	1	0	0	0	0	0	0	0	0	0	0	0	0	0	0	0	0	0	0	0	0
	4930579J19Rik	4930579J19Rik|-|-|13|13 A3.3|ncRNA	NR_131033	0	0	0	0	#DIV/0!	#DIV/0!	#DIV/0!	#DIV/0!	NA	1	1	NA	1	1	NA	1	1	NA	1	1	NA	1	1	NA	1	1	0	0	0	0	0	0	0	0	0	0	0	0	0	0	0	0	0	0	0	0
	4930579K19Rik	4930579K19Rik|-|-|9|9 E3.3|ncRNA	NR_029444	0.437	0.2715	0.3744	0.372167	1.07371	2.01111	1.4625	0.886111	0.428686	0.308	0.499	-0.0909629	0.862	0.913	-0.0138	0.977	0.985	0.355355	0.296	0.653	0.511	0.275	0.45	0.125532	0.811422	0.909304	0.398	0.448	0.465	0.236	0.171	0.301	0.378	0.509	0.278	0.157	0.75	0.178	0.586	0.394	0.257	0.268	0.372	0.356	0.407	0.135
	4930579P08Rik	4930579P08Rik|-|-|10|10 D2|ncRNA	NR_131036	0	0	0	0	#DIV/0!	#DIV/0!	#DIV/0!	#DIV/0!	NA	1	1	NA	1	1	NA	1	1	NA	1	1	NA	1	1	NA	1	1	0	0	0	0	0	0	0	0	0	0	0	0	0	0	0	0	0	0	0	0
	4930581F22Rik	4930581F22Rik|-|-|9|9 A4|ncRNA	NR_029475	0.122667	0.17725	0.348	0.481667	0.461153	0.798423	2.175	1.50052	-0.590646	0.175	0.345	-1.62219	0.000271	0.00102	2.18	1.4e-06	9.51e-06	0.748132	0.0161	0.126	1.43	0.000307	0.00254	-0.380788	0.313998	0.561785	0.112	0.17	0.086	0.146	0.27	0.145	0.148	0.407	0.133	0.274	0.385	0.541	0.328	0.789	0.57	0.373	0.417	0.413	0.266	0.222
	4930583I09Rik	4930583I09Rik|-|-|17|17 E1.1|protein-coding	NM_030031	0	0	0	0	#DIV/0!	#DIV/0!	#DIV/0!	#DIV/0!	NA	1	1	NA	1	1	NA	1	1	NA	1	1	NA	1	1	NA	1	1	0	0	0	0	0	0	0	0	0	0	0	0	0	0	0	0	0	0	0	0
	4930583K01Rik	4930583K01Rik|-|-|7|7 F1|ncRNA	NR_027879	0.0216667	0.03475	0	0.00716667	0.223368	1.39	0	0.140523	-0.197946	0.647	1	0.126554	0.815	1	-1.17	0.733	1	-0.119184	0.476	1	-2.2	0.285	1	0.335438	0.915169	1	0.065	0	0	0.088	0.02	0	0.031	0	0	0	0	0	0	0.043	0	0	0	0	0.097	0.025
	4930583P06Rik	4930583P06Rik|-|-|2|2 F1|ncRNA	NR_040612	0	0	0	0	#DIV/0!	#DIV/0!	#DIV/0!	#DIV/0!	NA	1	1	NA	1	1	NA	1	1	NA	1	1	NA	1	1	NA	1	1	0	0	0	0	0	0	0	0	0	0	0	0	0	0	0	0	0	0	0	0
	4930584F24Rik	4930584F24Rik|1700001J09Rik|4930522C06Rik|-|5|5 B1|ncRNA	NR_029445	0	0	0	0	#DIV/0!	#DIV/0!	#DIV/0!	#DIV/0!	NA	1	1	NA	1	1	NA	1	1	NA	1	1	NA	1	1	NA	1	1	0	0	0	0	0	0	0	0	0	0	0	0	0	0	0	0	0	0	0	0
	4930586N03Rik	4930586N03Rik|-|-|13|13 A3.1|ncRNA	NR_131052	0.717667	0.49425	0.5372	0.443833	0.568674	0.337142	0.592282	0.452429	0.318233	0.429	0.618	0.161132	0.736	0.825	-0.521	0.36	0.496	0.124284	0.708	0.904	-0.151	0.777	0.873	0.382458	0.505832	0.716628	0.827	0.833	0.493	0.266	0.491	0.692	0.528	1.224	0.364	0.355	0.509	0.234	0.47	0	0.652	0.667	0.407	0.467	1.262	1.466
	4930587E11Rik	4930587E11Rik|4930523E13Rik|-|6|6 D3|ncRNA	NR_131017	0	0	0.0072	0	#DIV/0!	#DIV/0!	#DIV/0!	#DIV/0!	NA	1	1	-0.296912	0.579	1	NA	1	1	0.0614787	0.649	1	NA	1	1	1.51548	0.6292	1	0	0	0	0	0	0	0	0	0	0	0.036	0	0	0	0	0	0	0	0	0
	4930590J08Rik	4930590J08Rik|Gm1071|-|6|6 D1|protein-coding	NM_198668	0.0126667	0.004	0.0182	0.0433333	#DIV/0!	0.0869565	0.23038	0.962963	0.213906	0.587	1	-0.355275	0.638	0.746	2.07	0.0403	0.0894	0.267535	0.267	1	3.16	0.00527	0.0254	-1.4072	0.118965	0.324249	0.006	0.032	0	0	0.016	0	0	0	0.016	0.005	0.009	0.061	0.061	0.067	0.033	0.027	0.042	0.03	0	0.046
	4930590L20Rik	4930590L20Rik|-|-|1|1 F|ncRNA	NR_040604	0.115333	0.139	0.1176	0.1385	0.0988289	0.15583	0.136427	0.173125	-0.180481	0.729	0.846	-0.12269	0.87	0.918	0.358	0.781	0.856	-0.0547096	0.85	0.955	-0.111	0.927	0.961	-0.130394	0.910556	0.962104	0.035	0.236	0.075	0	0.328	0.079	0.149	0.178	0.195	0.09	0	0.125	0	0	0.202	0.113	0.391	0.125	1.167	0.892
	4930591A17Rik	4930591A17Rik|-|-|2|2 H4|protein-coding	NM_026596	0	0	0	0	#DIV/0!	#DIV/0!	#DIV/0!	#DIV/0!	NA	1	1	NA	1	1	NA	1	1	NA	1	1	NA	1	1	NA	1	1	0	0	0	0	0	0	0	0	0	0	0	0	0	0	0	0	0	0	0	0
	4930591E09Rik	4930591E09Rik|-|-|10|10 B1|ncRNA	NR_131035	0	0	0	0	#DIV/0!	#DIV/0!	#DIV/0!	#DIV/0!	NA	1	1	NA	1	1	NA	1	1	NA	1	1	NA	1	1	NA	1	1	0	0	0	0	0	0	0	0	0	0	0	0	0	0	0	0	0	0	0	0
	4930592A05Rik	4930592A05Rik|-|-|15|15 B3.1|ncRNA	NR_045070	3.56033	8.6085	8.9974	9.01767	4.18371	7.46618	8.48811	4.85604	-1.37285	2.31e-07	5.78e-06	-1.6227	2.99e-16	5.34e-15	1.51	1.9e-11	2.58e-10	0.16874	0.423	0.756	0.0409	0.865	0.926	0.147643	0.415663	0.651202	3.036	3.998	3.647	9.785	6.978	11.221	6.45	10.247	10.117	7.886	7.86	8.877	5.897	9.146	8.563	9.949	10.38	10.171	0.851	1.153
	4930592I03Rik	4930592I03Rik|-|-|18|18 E3|ncRNA	NR_033307	0	0.0305	0.0182	0	#DIV/0!	1.32609	#DIV/0!	#DIV/0!	-0.329037	0.335	1	-0.417814	0.441	1	NA	1	1	-0.0160848	0.93	1	-2.56	0.414	1	2.37466	0.446691	1	0	0	0	0.039	0	0	0.083	0	0	0	0.091	0	0	0	0	0	0	0	0	0.023
	4930593A02Rik	4930593A02Rik|4933440I01Rik|-|3|3 D|ncRNA	NR_045167	0	0	0.0192	0.0251667	#DIV/0!	0	#DIV/0!	0.387179	NA	1	1	-0.417814	0.441	1	2.85	0.236	1	0.101859	0.456	1	2.34	0.286	1	0.176502	0.924512	1	0	0	0	0	0	0	0	0	0	0	0.096	0	0.04	0	0.04	0.033	0.038	0	0	0.048
	4930593C16Rik	4930593C16Rik|-|-|9|9 F4|ncRNA	NR_040753	0	0	0	0	#DIV/0!	0	#DIV/0!	#DIV/0!	NA	1	1	NA	1	1	NA	1	1	NA	1	1	NA	1	1	NA	1	1	0	0	0	0	0	0	0	0	0	0	0	0	0	0	0	0	0	0	0	0.076
	4930594C11Rik	4930594C11Rik|-|-|1|1 B|pseudo	NR_024017	0.0643333	0.07425	0.0966	0.041	1.03763	0.765464	3.01875	2.5625	-0.187706	0.72	0.84	-0.576949	0.376	0.512	-0.611	0.542	0.67	0.211608	0.538	0.826	-0.923	0.238	0.408	1.39085	0.0746267	0.243552	0.035	0.023	0.135	0.056	0.059	0.142	0.04	0.142	0.077	0.018	0.097	0.149	0.007	0	0.04	0.045	0.104	0.05	0.062	0.097
	4930594O21Rik	4930594O21Rik|-|-|3|3 B|ncRNA	NR_130162	0	0	0	0	0	#DIV/0!	#DIV/0!	#DIV/0!	NA	1	1	NA	1	1	NA	1	1	NA	1	1	NA	1	1	NA	1	1	0	0	0	0	0	0	0	0	0	0	0	0	0	0	0	0	0	0	0.04	0
	4930595D18Rik	4930595D18Rik|-|-|12|12 F1|ncRNA	NR_130987	0.0403333	0	0.041	0.007	0.775641	0	1.13889	#DIV/0!	0.278659	0.374	1	-0.0729511	0.919	0.95	-2.01	0.471	1	0.131258	0.393	1	0.619	0.848	1	2.31967	0.346571	1	0.07	0	0.051	0	0	0	0	0	0	0	0.037	0.168	0	0	0	0	0	0.042	0.052	0.082
	4930595M18Rik	4930595M18Rik|-|-|X|X B|protein-coding	NM_173435	0	0	0	0	#DIV/0!	#DIV/0!	#DIV/0!	#DIV/0!	NA	1	1	NA	1	1	NA	1	1	NA	1	1	NA	1	1	NA	1	1	0	0	0	0	0	0	0	0	0	0	0	0	0	0	0	0	0	0	0	0
	4930596D02Rik	4930596D02Rik|-|-|14|14 B|protein-coding	NM_001033766	0	0	0	0	#DIV/0!	#DIV/0!	#DIV/0!	#DIV/0!	NA	1	1	NA	1	1	NA	1	1	NA	1	1	NA	1	1	NA	1	1	0	0	0	0	0	0	0	0	0	0	0	0	0	0	0	0	0	0	0	0
	4930596I21Rik	4930596I21Rik|-|-|1|1 E4|ncRNA	NR_108103	0.014	0.03625	0.013	0	#DIV/0!	#DIV/0!	#DIV/0!	#DIV/0!	-0.172676	0.611	1	-0.170398	0.751	1	-0.315	0.929	1	-0.0165236	0.916	1	-1.81	0.569	1	1.51548	0.6292	1	0.042	0	0	0.085	0	0	0.06	0	0	0	0.065	0	0	0	0	0	0	0	0	0
	4930597A21Rik	4930597A21Rik|-|-|11|11 B1.1|ncRNA	NR_126460	0	0	0	0	#DIV/0!	#DIV/0!	#DIV/0!	#DIV/0!	NA	1	1	NA	1	1	NA	1	1	NA	1	1	NA	1	1	NA	1	1	0	0	0	0	0	0	0	0	0	0	0	0	0	0	0	0	0	0	0	0
	4930597G03Rik	4930597G03Rik|-|-|14|14 C1|ncRNA	NR_045736	0	0	0	0	#DIV/0!	#DIV/0!	#DIV/0!	#DIV/0!	NA	1	1	NA	1	1	NA	1	1	NA	1	1	NA	1	1	NA	1	1	0	0	0	0	0	0	0	0	0	0	0	0	0	0	0	0	0	0	0	0
	4930598F16Rik	4930598F16Rik|-|-|1|1 D|ncRNA	NR_040479	0	0	0	0	#DIV/0!	#DIV/0!	#DIV/0!	#DIV/0!	NA	1	1	NA	1	1	NA	1	1	NA	1	1	NA	1	1	NA	1	1	0	0	0	0	0	0	0	0	0	0	0	0	0	0	0	0	0	0	0	0
	4930599N23Rik	4930599N23Rik|-|-|6|6 B1|ncRNA	NR_045813	0.690333	0.76175	1.1102	0.8595	0.676797	0.716604	0.330122	0.60828	-0.282645	0.449	0.636	-0.957473	0.00829	0.0215	0.469	0.258	0.391	0.559811	0.0404	0.223	0.14	0.696	0.818	0.556031	0.0944775	0.281653	0.741	0.883	0.447	0.554	0.901	0.94	0.652	0.78	1.398	1.086	0.884	1.403	0.577	0.302	0.906	1.02	1.222	1.13	1.02	1.063
	4931402G19Rik	4931402G19Rik|-|-|2|2 E5|ncRNA	NR_040608	0.122	0.278	0.3644	0.363	1.07965	1.48663	2.14353	1.3908	-1.0719	0.0136	0.0527	-1.69543	9.14e-05	0.000374	1.74	8.27e-05	0.000405	0.392397	0.178	0.518	0.396	0.253	0.424	0.111882	0.720954	0.859349	0.093	0.2	0.073	0.155	0.287	0.404	0.266	0.52	0.354	0.32	0.264	0.364	0.208	0.302	0.491	0.437	0.301	0.439	0.113	0.187
	4931403E22Rik	4931403E22Rik|-|-|19|19 C1|ncRNA	NR_045306	0	0.0405	0.0294	0.0383333	0	0.2025	0.0828169	0.186992	-0.455262	0.24	1	-0.296912	0.579	1	2.85	0.308	1	-0.0912593	0.677	1	-0.0656	0.965	1	-0.731297	0.722991	1	0	0	0	0.029	0.027	0.065	0.041	0.147	0	0	0	0	0	0	0.083	0.093	0.054	0	0.128	0.2
	4931403G20Rik	4931403G20Rik|-|-|12|12 C2|ncRNA	NR_038173	0.145333	0.159	0.1144	0.0831667	0.528485	0.940828	0.733333	1.03958	-0.177686	0.712	0.836	-0.032061	0.958	0.975	-0.707	0.365	0.502	-0.102139	0.766	0.926	-0.952	0.151	0.301	0.736193	0.313168	0.561112	0.225	0.126	0.085	0.057	0.19	0.229	0.16	0.057	0.031	0.154	0.21	0.12	0.044	0	0.184	0.127	0.084	0.06	0.275	0.169
	4931406B18Rik	4931406B18Rik|4930538L19Rik|-|7|7 B3|protein-coding	NM_028737	0	0.01675	0.0042	0.003	#DIV/0!	#DIV/0!	#DIV/0!	#DIV/0!	-0.770594	0.091	1	-0.419971	0.441	1	1.91	0.588	1	-0.23326	0.359	1	-2.36	0.136	0.28	0.925179	0.677529	1	0	0	0	0.02	0.014	0.033	0	0	0.013	0.008	0	0	0	0	0.009	0	0	0.009	0	0
	4931406C07Rik	4931406C07Rik|-|-|9|9 A2|protein-coding	NM_133732	25.3717	44.4685	33.2326	27.3975	2.25686	4.49313	5.08455	3.71139	-0.962901	4.15e-05	0.000484	-0.711026	3.69e-05	0.000163	0.303	0.157	0.267	-0.261457	0.205	0.555	-0.715	0.00336	0.0178	0.424934	0.0298572	0.133986	26.162	26.138	23.815	50.979	50.078	48.297	28.52	31.732	39.346	38.82	25.545	30.72	35.508	19.151	27.311	26.818	24.374	31.223	11.242	9.897
	4931406H21Rik	4931406H21Rik|-|-|14|14 A3|ncRNA	NR_033492	0	0.0065	0.0108	0.0015	#DIV/0!	#DIV/0!	#DIV/0!	#DIV/0!	-0.273749	0.389	1	-0.557157	0.348	0.484	1.13	0.75	1	0.094034	0.629	1	-1.75	0.505	1	2.81139	0.29951	1	0	0	0	0	0.005	0	0.021	0	0	0	0.054	0	0	0	0	0	0	0.009	0	0
	4931406P16Rik	4931406P16Rik|AA553327|mKIAA0355|-|7|7 B1|protein-coding	NM_172741	5.16167	5.8275	4.3026	3.74417	0.663965	0.864743	0.725076	1.27483	-0.357268	0.0532	0.148	-0.0645389	0.633	0.742	-0.304	0.25	0.382	-0.287104	0.0403	0.223	-0.674	0.00603	0.0283	0.373078	0.0766878	0.247564	5.831	4.764	4.89	5.352	7.054	5.863	5.041	4.549	3.897	4.828	4.055	4.184	3.8	1.579	3.785	5.003	3.873	4.425	7.774	6.739
	4931408C20Rik	4931408C20Rik|-|-|1|1 A5|protein-coding	NM_001033764	0	0.0015	0	0	#DIV/0!	0.15	#DIV/0!	#DIV/0!	-0.0897196	0.748	1	NA	1	1	NA	1	1	0.00913838	0.946	1	-0.583	0.857	1	NA	1	1	0	0	0	0	0	0	0.006	0	0	0	0	0	0	0	0	0	0	0	0	0.01
	4931408D14Rik	4931408D14Rik|-|-|19|19 C2|ncRNA	NR_040299	0.00866667	0.02475	0.011	0.0336667	0.0414673	0.213362	0.103774	0.487923	-0.707884	0.178	0.348	-0.179456	0.801	0.871	2.21	0.0628	0.128	-0.278128	0.319	1	0.302	0.714	0.829	-1.8156	0.123029	0.330382	0.019	0.007	0	0.044	0.023	0.014	0.018	0	0	0	0.01	0.045	0.055	0.049	0.012	0.04	0.012	0.034	0.209	0.116
	4931409K22Rik	4931409K22Rik|Iqca1l|Iqca1p1|-|5|5 A3|protein-coding	NM_177676	0.019	0.00175	0	0.00216667	#DIV/0!	0.102941	0	#DIV/0!	0.41882	0.289	1	0.442943	0.451	0.584	-2.6	0.309	1	0.00913838	0.946	1	-0.102	0.975	1	0.335438	0.915169	1	0	0.041	0.016	0	0.007	0	0	0	0	0	0	0	0	0	0	0	0.013	0	0	0.017
	4931414P19Rik	4931414P19Rik|-|-|14|14 C2|protein-coding	NM_028890	1.659	1.51	1.2882	2.04767	1.93132	1.20223	0.90147	0.968164	-0.0543918	0.795	0.885	0.015619	0.94	0.964	0.484	0.0142	0.0374	-0.0625609	0.715	0.907	0.422	0.00999	0.0415	-0.490237	0.00373697	0.0327631	1.942	1.427	1.608	1.462	1.532	1.514	1.532	1.061	1.158	1.515	1.329	1.378	1.613	2.142	2.364	2.188	1.939	2.04	0.859	1.256
	4931417E11Rik	4931417E11Rik|-|-|6|6 C1|protein-coding	NM_025737	0	0.00625	0	0	#DIV/0!	#DIV/0!	#DIV/0!	0	-0.0897196	0.748	1	NA	1	1	NA	1	1	0.00913838	0.946	1	-0.583	0.857	1	NA	1	1	0	0	0	0	0	0	0.025	0	0	0	0	0	0	0	0	0	0	0	0	0
	4931419H13Rik	4931419H13Rik|-|-|3|3 C|ncRNA	NR_040593	0.007	0	0	0.00633333	#DIV/0!	#DIV/0!	#DIV/0!	#DIV/0!	0.0334247	0.905	1	-0.0715375	0.894	1	0.555	0.875	1	NA	1	1	1.01	0.754	1	-0.0545342	0.986171	1	0	0	0.021	0	0	0	0	0	0	0	0	0	0	0	0.038	0	0	0	0	0
	4931420L22Rik	4931420L22Rik|-|-|16|16 C3.1|ncRNA	NR_040561	0	0	0	0	#DIV/0!	#DIV/0!	#DIV/0!	#DIV/0!	NA	1	1	NA	1	1	NA	1	1	NA	1	1	NA	1	1	NA	1	1	0	0	0	0	0	0	0	0	0	0	0	0	0	0	0	0	0	0	0	0
	4931423N10Rik	4931423N10Rik|-|-|2|2 A3|protein-coding	NM_027635	0.0176667	0.0185	0.014	0.015	0.189964	0.169725	0.14433	0.365854	-0.0382685	0.925	1	-0.0242186	0.973	0.984	0.000123	1	1	-0.0114188	0.951	1	-0.241	0.904	0.947	0.0748289	0.966596	1	0.042	0	0.011	0	0	0	0.074	0	0	0	0.033	0.037	0.02	0	0.05	0	0.02	0	0.093	0.109
	4931428F04Rik	4931428F04Rik|AI426165|Kiaa0895l|-|8|8 D3|protein-coding	NM_001166394	24.828	4.50125	3.5822	5.57433	0.415559	0.259752	0.423829	0.542039	2.11494	6.17e-13	5.19e-11	2.44784	1.41e-40	1.33e-38	-2.03	8.28e-27	4.4e-25	-0.153241	0.53	0.822	0.267	0.325	0.503	-0.44628	0.00719213	0.0517126	30.055	25.01	19.419	2.616	3.876	3.566	7.947	3.535	3.062	2.829	4.059	4.426	3.813	5.296	7.114	5.285	5.452	6.486	59.746	17.329
	4931428L18Rik	4931428L18Rik|4930563O14Rik|-|1|1 B|ncRNA	NR_033445	0	0	0.0098	0	#DIV/0!	#DIV/0!	#DIV/0!	0	NA	1	1	-0.296912	0.579	1	NA	1	1	0.0614787	0.649	1	NA	1	1	1.51548	0.6292	1	0	0	0	0	0	0	0	0	0.049	0	0	0	0	0	0	0	0	0	0	0
	4931429L15Rik	4931429L15Rik|-|-|9|9 A5.2|protein-coding	NM_183104	0.0136667	0.01125	0.0254	0.017	0.650794	0.255682	1.69333	0.772727	0.0288602	0.942	1	-0.426173	0.551	0.673	0.315	0.886	0.927	0.19371	0.406	1	0.468	0.793	0.884	1.04083	0.527825	1	0	0	0.041	0	0.018	0	0.027	0	0	0.024	0.103	0	0	0	0	0.015	0.053	0.034	0.021	0.044
	4931429P17Rik	4931429P17Rik|-|-|13|13 A5|ncRNA	NR_038004	0.007	0.0045	0.01	0.0055	#DIV/0!	#DIV/0!	#DIV/0!	#DIV/0!	0.015886	0.957	1	-0.195884	0.761	0.843	-0.29	0.925	1	0.0693511	0.682	1	-0.114	0.968	1	1.19824	0.587791	1	0	0	0.021	0	0.018	0	0	0	0	0.016	0	0.034	0	0	0	0.015	0.018	0	0	0
	4931430N09Rik	4931430N09Rik|-|-|6|6 F1|ncRNA	NR_046053	0.0116667	0.00325	0	0	#DIV/0!	#DIV/0!	#DIV/0!	#DIV/0!	0.132077	0.671	1	0.195074	0.72	1	-2.07	0.546	1	0.00913838	0.946	1	-0.583	0.857	1	NA	1	1	0.035	0	0	0	0	0	0.013	0	0	0	0	0	0	0	0	0	0	0	0	0
	4931431B13Rik	4931431B13Rik|1700108I23Rik|AA536668|-|7|7 F3|ncRNA	NR_045183	0	0	0.014	0.0773333	#DIV/0!	#DIV/0!	#DIV/0!	0.604167	NA	1	1	-0.361269	0.5	1	3.51	0.171	0.286	0.0784401	0.563	1	2.99	0.203	1	-1.18502	0.570936	1	0	0	0	0	0	0	0	0	0	0.07	0	0	0	0.241	0.157	0.066	0	0	0	0
	4931431C16Rik	4931431C16Rik|-|-|5|5 B3|ncRNA	NR_045807	0.248667	0.208	0.2006	0.2115	1.45419	0.8	0.716429	0.709732	0.0995437	0.797	0.886	0.0791856	0.848	0.905	-0.0998	0.815	0.879	0.0251756	0.935	0.979	0.0148	0.971	0.985	0.0198751	0.960244	0.984944	0.217	0.22	0.309	0.171	0.145	0.317	0.199	0.25	0.156	0.144	0.153	0.3	0.082	0.18	0.318	0.203	0.274	0.212	0.171	0.26
	4931431F19Rik	4931431F19Rik|-|-|7|7 E3|protein-coding	NM_027634	0	0	0	0	#DIV/0!	#DIV/0!	#DIV/0!	#DIV/0!	NA	1	1	NA	1	1	NA	1	1	NA	1	1	NA	1	1	NA	1	1	0	0	0	0	0	0	0	0	0	0	0	0	0	0	0	0	0	0	0	0
	4931440F15Rik	4931440F15Rik|Fem1ab|-|11|11 A3.3|protein-coding	NM_176829	0.0433333	0.04725	0.0448	0.129833	0.666667	0.258197	0.207407	0.521419	-0.174896	0.734	0.849	-0.369692	0.602	0.716	1.75	0.00754	0.0219	0.0931816	0.776	0.927	1.48	0.0155	0.058	-1.16916	0.115101	0.318415	0.053	0.039	0.038	0.03	0.055	0.079	0.025	0.03	0	0.085	0.109	0	0.046	0.185	0.26	0.094	0.131	0.063	0.065	0.183
	4931440J10Rik	4931440J10Rik|-|-|14|14 D1|ncRNA	NR_045503	0.0906667	0.13875	0.0934	0.0823333	0.469775	1.11	0.311333	0.321615	-0.364263	0.497	0.676	-0.242147	0.744	0.83	-0.0464	0.971	0.981	-0.125052	0.708	0.904	-0.808	0.367	0.545	0.472093	0.634239	0.807819	0.086	0	0.186	0.11	0.101	0.098	0.246	0	0.181	0.074	0.135	0.077	0.085	0	0.021	0.035	0.121	0.232	0.193	0.125
	4931440P22Rik	4931440P22Rik|-|-|3|3 E1|ncRNA	NR_027955	0.177333	0.28725	0.2794	0.396167	0.969035	2.41387	1.03481	2.03162	-0.720781	0.0867	0.209	-0.860323	0.11	0.196	1.34	0.00347	0.0112	0.0815046	0.805	0.939	0.439	0.217	0.383	-0.320253	0.479085	0.698548	0.206	0.093	0.233	0.345	0.29	0.28	0.234	0.105	0.43	0.124	0.481	0.257	0.323	0.55	0.527	0.282	0.346	0.349	0.183	0.119
	4932411N23Rik	4932411N23Rik|-|-|X|X E3|protein-coding	NM_177705	0	0	0	0.00133333	#DIV/0!	#DIV/0!	#DIV/0!	#DIV/0!	NA	1	1	NA	1	1	1.13	0.75	1	NA	1	1	0.619	0.848	1	0.335438	0.915169	1	0	0	0	0	0	0	0	0	0	0	0	0	0	0	0	0.008	0	0	0	0
	4932412D23Rik	4932412D23Rik|ENSMUSG00000075070|Gm10809|-|16|16 B4|ncRNA	NR_040522	0	0	0	0	#DIV/0!	#DIV/0!	#DIV/0!	#DIV/0!	NA	1	1	NA	1	1	1.66	0.638	1	NA	1	1	1.15	0.72	1	-0.199571	0.949398	1	0	0	0	0	0	0	0	0	0	0	0	0	0	0	0	0	0	0	0	0
	4932413F04Rik	4932413F04Rik|-|-|9|9 F1|ncRNA	NR_040764	0.00233333	0.009	0.0012	0	#DIV/0!	#DIV/0!	#DIV/0!	#DIV/0!	-0.2134	0.553	1	-0.158755	0.767	1	-0.315	0.929	1	-0.0464213	0.768	1	-2.18	0.49	1	1.31974	0.674376	1	0.007	0	0	0	0	0.016	0.02	0	0	0.006	0	0	0	0	0	0	0	0	0	0
	4932414J04Rik	4932414J04Rik|-|-|11|11 A3.1|ncRNA	NR_028259	0	0	0	0	#DIV/0!	#DIV/0!	#DIV/0!	#DIV/0!	NA	1	1	NA	1	1	NA	1	1	NA	1	1	NA	1	1	NA	1	1	0	0	0	0	0	0	0	0	0	0	0	0	0	0	0	0	0	0	0	0
	4932414N04Rik	4932414N04Rik|-|-|2|2 C2|protein-coding	NM_183113	0	0	0	0	#DIV/0!	#DIV/0!	#DIV/0!	#DIV/0!	NA	1	1	NA	1	1	NA	1	1	NA	1	1	NA	1	1	NA	1	1	0	0	0	0	0	0	0	0	0	0	0	0	0	0	0	0	0	0	0	0
	4932415M13Rik	4932415M13Rik|-|-|17|17 C|ncRNA	NR_073205	0	0	0	0	#DIV/0!	#DIV/0!	#DIV/0!	#DIV/0!	NA	1	1	NA	1	1	NA	1	1	NA	1	1	NA	1	1	NA	1	1	0	0	0	0	0	0	0	0	0	0	0	0	0	0	0	0	0	0	0	0
	4932416H05Rik	4932416H05Rik|-|-|2|2 F1|ncRNA	NR_029452	2.00367	1.5435	1.3722	1.41333	0.765635	0.601051	0.651258	0.6262	0.188955	0.415	0.606	0.23087	0.231	0.356	-0.328	0.116	0.209	-0.0276227	0.89	0.967	-0.134	0.538	0.698	0.100948	0.591852	0.778319	1.947	2.01	2.054	1.074	1.672	1.402	2.026	1.453	1.103	1.204	1.532	1.569	1.248	1.235	2.102	1.445	1.224	1.226	2.617	2.568
	4932429P05Rik	4932429P05Rik|-|-|X|X C1|protein-coding	NM_001085511	0	0	0	0	#DIV/0!	#DIV/0!	#DIV/0!	#DIV/0!	NA	1	1	NA	1	1	NA	1	1	NA	1	1	NA	1	1	NA	1	1	0	0	0	0	0	0	0	0	0	0	0	0	0	0	0	0	0	0	0	0
	4932435O22Rik	4932435O22Rik|-|-|11|11 E2|ncRNA	NR_027643	0.0326667	0.093	0.0742	0.0148333	0.653333	0.715385	2.12	0.824074	-1.03539	0.0466	0.134	-1.16069	0.0695	0.133	-0.906	0.502	0.634	-0.1057	0.751	0.92	-2.71	0.000906	0.00618	2.5409	0.00127691	0.0152451	0.079	0.013	0.006	0.046	0.111	0.127	0.088	0.086	0.063	0.072	0.07	0.08	0	0.044	0.016	0.009	0	0.02	0.05	0.13
	4932438A13Rik	4932438A13Rik|4732443H21|B830039D19Rik|D630029K19Rik|FSA|Kiaa1109|Tweek|-|3|3 B|protein-coding	NM_172679	4.014	2.78575	2.5684	2.27417	0.411777	0.378344	0.459381	0.771165	0.304812	0.246	0.432	0.312684	0.13	0.225	-0.625	0.00704	0.0207	0.0113487	0.958	0.987	-0.301	0.221	0.388	0.311209	0.108707	0.307991	5.277	3.415	3.35	2.501	3.966	2.85	1.826	1.835	2.343	2.867	2.239	3.558	2.814	1.579	2.153	2.685	2.139	2.275	9.748	7.363
	4932438H23Rik	4932438H23Rik|4931406G06Rik|AI550392|-|16|16 C3.3|protein-coding	NM_001163695	1.82733	2.33475	1.396	1.55283	13.0524	4.4899	6.40367	4.55376	-0.531221	0.0482	0.138	0.0502841	0.812	0.879	-0.0199	0.95	0.969	-0.547464	0.0143	0.117	-0.594	0.0584	0.155	-0.0240033	0.927784	0.969913	1.649	2.156	1.677	3.377	2.191	1.746	2.025	1.405	1.445	1.591	1.163	1.376	2.202	1.865	1.298	1.317	1.203	1.432	0.14	0.52
	4932441J04Rik	4932441J04Rik|-|-|5|5 C1|ncRNA	NR_015588	0.177	0.46675	0.415	0.499667	0.375	0.606957	0.597122	0.823174	-1.15084	0.0147	0.0558	-1.05165	0.104	0.186	1.66	0.00329	0.0107	-0.0971195	0.777	0.928	0.0852	0.839	0.912	-0.299753	0.616083	0.794898	0.212	0.119	0.2	0.431	0.373	0.421	0.642	0.406	0.295	0.114	0.124	1.136	0.338	0.577	0.666	0.641	0.445	0.331	0.472	0.769
	4932443I19Rik	4932443I19Rik|A230061C02Rik|Gm1106|-|8|8 A1.1|protein-coding	NM_001101519	0.865	1.72875	1.7094	1.33967	3.93182	12.0892	22.4921	3.81671	-1.04285	0.00281	0.0153	-1.15369	0.00185	0.00569	0.801	0.0139	0.0367	0.0386125	0.892	0.968	-0.388	0.193	0.355	0.425454	0.158499	0.381698	0.715	1.109	0.771	1.854	1.018	1.901	2.142	2.77	1.443	1.079	1.229	2.026	0.87	1.414	1.548	1.51	1.243	1.453	0.22	0.143
	4932702P03Rik	4932702P03Rik|1700047I16Rik|-|13|13 A3.1|ncRNA	NR_045182	24.147	48.7523	38.8872	35.1893	1.73982	2.82393	2.70727	2.36567	-1.14335	8e-06	0.000123	-1.00042	1.15e-07	7.81e-07	0.717	0.0073	0.0213	-0.172897	0.432	0.762	-0.503	0.0794	0.193	0.308219	0.184481	0.416203	24.294	27.124	21.023	51.689	54.287	60.036	28.997	45.032	44.177	42.027	28.214	34.986	40.329	17.439	32.156	51.427	36.398	33.387	13.879	17.264
	4933400A11Rik	4933400A11Rik|-|-|X|X F5|pseudo	NR_003635	0	0	0	0	#DIV/0!	#DIV/0!	#DIV/0!	#DIV/0!	NA	1	1	NA	1	1	NA	1	1	NA	1	1	NA	1	1	NA	1	1	0	0	0	0	0	0	0	0	0	0	0	0	0	0	0	0	0	0	0	0
	4933400B14Rik	4933400B14Rik|-|-|17|17 E5|ncRNA	NR_045432	0	0	0	0	#DIV/0!	0	#DIV/0!	#DIV/0!	NA	1	1	NA	1	1	NA	1	1	NA	1	1	NA	1	1	NA	1	1	0	0	0	0	0	0	0	0	0	0	0	0	0	0	0	0	0	0	0	0.046
	4933400C23Rik	4933400C23Rik|4933400C23|-|9|9 E3.3|ncRNA	NR_040770	0.342333	0.16425	0.067	0.0648333	6.84667	12.6346	3.94118	1.47348	0.707415	0.125	0.273	1.48414	0.0252	0.0563	-2.19	0.0339	0.0776	-0.382031	0.246	0.601	-1.28	0.195	0.357	0.159569	0.896698	0.955123	0.224	0.416	0.387	0.091	0.074	0.204	0.288	0.057	0.063	0	0.175	0.04	0	0.244	0.043	0	0.042	0.06	0.05	0.013
	4933400F21Rik	4933400F21Rik|1700091C04Rik|4930565K10Rik|-|1|1 D|ncRNA	NR_015540	0.00366667	0.002	0	0.00866667	#DIV/0!	0.333333	#DIV/0!	#DIV/0!	0.0588792	0.85	1	0.0552148	0.918	1	1.6	0.554	0.679	0.00913838	0.946	1	2.23	0.44	0.615	-2.0076	0.514862	1	0.005	0	0.006	0	0	0	0.008	0	0	0	0	0	0	0.052	0	0	0	0	0	0.006
	4933400L20Rik	4933400L20Rik|-|-|8|8 D2|ncRNA	NR_045730	0	0	0	0	#DIV/0!	#DIV/0!	#DIV/0!	#DIV/0!	NA	1	1	NA	1	1	NA	1	1	NA	1	1	NA	1	1	NA	1	1	0	0	0	0	0	0	0	0	0	0	0	0	0	0	0	0	0	0	0	0
	4933401B06Rik	4933401B06Rik|-|-|X|X D|pseudo	NR_033580	0.0353333	0.0055	0.0088	0.0095	#DIV/0!	#DIV/0!	#DIV/0!	0.791667	0.255681	0.46	1	0.255708	0.673	0.775	-1.83	0.493	0.625	0.0314126	0.817	1	0.431	0.882	1	0.495485	0.857288	1	0	0.106	0	0	0	0	0.022	0	0.044	0	0	0	0	0	0	0	0.029	0.028	0	0
	4933401D09Rik	4933401D09Rik|-|-|17|17 A2|ncRNA	NR_045431	0	0	0	0	#DIV/0!	#DIV/0!	#DIV/0!	#DIV/0!	NA	1	1	NA	1	1	NA	1	1	NA	1	1	NA	1	1	NA	1	1	0	0	0	0	0	0	0	0	0	0	0	0	0	0	0	0	0	0	0	0
	4933401H06Rik	4933401H06Rik|-|-|3|3 G3|ncRNA	NR_040540	0	0.00725	0	0.00633333	#DIV/0!	0.302083	0	#DIV/0!	-0.0897196	0.748	1	NA	1	1	1.13	0.75	1	0.00913838	0.946	1	-0.102	0.975	1	0.335438	0.915169	1	0	0	0	0	0	0	0.029	0	0	0	0	0	0	0	0	0	0.038	0	0	0.024
	4933402C06Rik	4933402C06Rik|-|-|7|7 B3|ncRNA	NR_045504	0	0	0	0	#DIV/0!	#DIV/0!	#DIV/0!	#DIV/0!	NA	1	1	NA	1	1	NA	1	1	NA	1	1	NA	1	1	NA	1	1	0	0	0	0	0	0	0	0	0	0	0	0	0	0	0	0	0	0	0	0
	4933402D24Rik	4933402D24Rik|-|-|1|1 C2|protein-coding	NM_001256158	0.125667	0.17775	0.1524	0.144333	0.215552	0.389803	0.312295	0.279175	-0.527166	0.248	0.434	-0.402499	0.515	0.641	0.353	0.617	0.733	-0.104595	0.76	0.923	-0.328	0.544	0.703	0.175425	0.804395	0.905792	0.076	0.172	0.129	0.177	0.174	0.173	0.187	0.279	0	0.084	0.204	0.195	0.15	0	0.211	0.088	0.183	0.234	0.583	0.456
	4933402E13Rik	4933402E13Rik|-|-|X|X A6|protein-coding	NM_001199997	0.0223333	0	0	0	1.01515	#DIV/0!	#DIV/0!	#DIV/0!	0.258349	0.377	1	0.33363	0.542	1	-2.84	0.401	1	NA	1	1	NA	1	1	NA	1	1	0	0.067	0	0	0	0	0	0	0	0	0	0	0	0	0	0	0	0	0.022	0
	4933402J07Rik	4933402J07Rik|-|-|8|8 C3|protein-coding	NM_177901	0.0126667	0	0	0	#DIV/0!	#DIV/0!	#DIV/0!	#DIV/0!	0.103793	0.71	1	0.0372416	0.945	1	-1.08	0.759	1	NA	1	1	NA	1	1	NA	1	1	0.038	0	0	0	0	0	0	0	0	0	0	0	0	0	0	0	0	0	0	0
	4933402J10Rik	4933402J10Rik|-|-|5|5 C2|ncRNA	NR_040683	0	0	0	0	#DIV/0!	#DIV/0!	#DIV/0!	#DIV/0!	NA	1	1	NA	1	1	NA	1	1	NA	1	1	NA	1	1	NA	1	1	0	0	0	0	0	0	0	0	0	0	0	0	0	0	0	0	0	0	0	0
	4933402J15Rik	4933402J15Rik|-|-|14|14 D3|ncRNA	NR_046059	0.004	0.02475	0	0	#DIV/0!	0.916667	#DIV/0!	0	-0.381863	0.352	1	-0.0715375	0.894	1	-0.315	0.929	1	-0.117291	0.448	1	-3.04	0.286	1	NA	1	1	0	0	0.012	0.047	0	0.052	0	0	0	0	0	0	0	0	0	0	0	0	0	0.027
	4933402N03Rik	4933402N03Rik|4930412O05|-|7|7 F3|protein-coding	NM_173409	0	0	0	0	#DIV/0!	#DIV/0!	#DIV/0!	#DIV/0!	NA	1	1	NA	1	1	NA	1	1	NA	1	1	NA	1	1	NA	1	1	0	0	0	0	0	0	0	0	0	0	0	0	0	0	0	0	0	0	0	0
	4933402N22Rik	4933402N22Rik|-|-|5 A1|5|protein-coding	NM_001177510	0	0	0	0	#DIV/0!	#DIV/0!	#DIV/0!	#DIV/0!	NA	1	1	NA	1	1	NA	1	1	NA	1	1	NA	1	1	NA	1	1	0	0	0	0	0	0	0	0	0	0	0	0	0	0	0	0	0	0	0	0
	4933402P03Rik	4933402P03Rik|-|-|11|11 B3|protein-coding	NM_175368	0.004	0.00275	0	0	#DIV/0!	0.196429	#DIV/0!	#DIV/0!	-0.0193514	0.945	1	-0.0715375	0.894	1	-0.315	0.929	1	0.00913838	0.946	1	-0.583	0.857	1	NA	1	1	0.012	0	0	0	0.011	0	0	0	0	0	0	0	0	0	0	0	0	0	0	0.014
	4933403O08Rik	4933403O08Rik|-|-|X|X E1|protein-coding	NM_001177389	0	0	0	0	#DIV/0!	#DIV/0!	#DIV/0!	#DIV/0!	NA	1	1	NA	1	1	NA	1	1	NA	1	1	NA	1	1	NA	1	1	0	0	0	0	0	0	0	0	0	0	0	0	0	0	0	0	0	0	0	0
	4933404G15Rik	4933404G15Rik|4933401J20Rik|-|16|16 A3|ncRNA	NR_045920	0	0	0	0	#DIV/0!	#DIV/0!	#DIV/0!	#DIV/0!	NA	1	1	NA	1	1	NA	1	1	NA	1	1	NA	1	1	NA	1	1	0	0	0	0	0	0	0	0	0	0	0	0	0	0	0	0	0	0	0	0
	4933404K08Rik	4933404K08Rik|-|-|13|13 A3.1|ncRNA	NR_046038	0	0	0	0	#DIV/0!	#DIV/0!	#DIV/0!	#DIV/0!	NA	1	1	NA	1	1	NA	1	1	NA	1	1	NA	1	1	NA	1	1	0	0	0	0	0	0	0	0	0	0	0	0	0	0	0	0	0	0	0	0
	4933404K13Rik	4933404K13Rik|-|-|10|10 B2|ncRNA	NR_131055	0	0	0	0	#DIV/0!	#DIV/0!	#DIV/0!	#DIV/0!	NA	1	1	NA	1	1	NA	1	1	NA	1	1	NA	1	1	NA	1	1	0	0	0	0	0	0	0	0	0	0	0	0	0	0	0	0	0	0	0	0
	4933404O12Rik	4933404O12Rik|AW494809|-|5 G2|5|ncRNA	NR_015555	3.336	2.135	1.68	1.883	0.550132	0.368676	0.396133	0.473472	0.431128	0.0876	0.211	0.641795	0.00635	0.017	-0.651	6.11e-05	0.000309	-0.172414	0.476	0.788	-0.197	0.363	0.541	-0.000840652	0.996648	0.998809	3.462	3.772	2.774	1.655	1.9	1.671	3.314	1.132	1.249	1.488	2.155	2.376	1.454	1.553	2.448	1.934	1.835	2.074	6.064	5.791
	4933405D12Rik	4933405D12Rik|-|-|3|3 G1|ncRNA	NR_046036	0	0	0	0.0536667	0	#DIV/0!	#DIV/0!	2.68333	NA	1	1	NA	1	1	3.85	0.186	0.306	NA	1	1	3.33	0.215	0.382	-2.37996	0.382926	1	0	0	0	0	0	0	0	0	0	0	0	0	0.074	0.248	0	0	0	0	0.056	0
	4933405E24Rik	4933405E24Rik|-|-|11 B1.3|11|ncRNA	NR_045506	0	0	0	0	#DIV/0!	#DIV/0!	#DIV/0!	#DIV/0!	NA	1	1	NA	1	1	NA	1	1	NA	1	1	NA	1	1	NA	1	1	0	0	0	0	0	0	0	0	0	0	0	0	0	0	0	0	0	0	0	0
	4933405L10Rik	4933405L10Rik|-|-|8 D3|8|protein-coding	NM_027655	0.114333	0.12475	0.1898	0.152333	0.501462	1.04832	1.43788	0.750411	-0.228069	0.659	0.801	-0.741942	0.225	0.35	0.554	0.552	0.678	0.281207	0.413	0.75	0.207	0.797	0.886	0.416237	0.585776	0.773749	0.154	0.115	0.074	0.122	0.177	0.078	0.122	0.349	0.143	0.088	0.186	0.183	0.084	0	0.396	0.028	0.223	0.183	0.228	0.119
	4933405O20Rik	4933405O20Rik|-|-|7|7 B4|protein-coding	NM_172901	0.00533333	0	0.0178	0.00383333	#DIV/0!	#DIV/0!	0.404545	0.348485	0.0334247	0.905	1	-0.377839	0.526	0.652	0.166	0.963	1	0.109969	0.424	1	0.619	0.848	1	2.1502	0.485972	1	0	0.016	0	0	0	0	0	0	0	0	0.089	0	0	0	0	0.023	0	0	0	0
	4933406C10Rik	4933406C10Rik|-|-|12|12 A3|ncRNA	NR_044986	0.061	0.0285	0.0596	0.1075	0.580952	0.261468	3.31111	2.33696	0.349617	0.494	0.673	-0.0706306	0.924	0.953	0.993	0.249	0.381	0.279232	0.354	0.706	2.04	0.0157	0.0584	-0.980432	0.206586	0.44434	0.082	0	0.101	0	0.044	0.053	0.017	0.06	0.065	0.01	0.037	0.126	0.127	0.116	0.102	0.17	0.088	0.042	0.105	0.109
	4933406D12Rik	4933406D12Rik|-|-|2|2 G1|ncRNA	NR_040502	0	0	0	0	#DIV/0!	#DIV/0!	#DIV/0!	#DIV/0!	NA	1	1	NA	1	1	NA	1	1	NA	1	1	NA	1	1	NA	1	1	0	0	0	0	0	0	0	0	0	0	0	0	0	0	0	0	0	0	0	0
	4933406F09Rik	4933406F09Rik|1700007H14Rik|4930429F21Rik|4930570O04Rik|Gm3768|-|14 4.38 cM|14 A1|ncRNA	NR_015568	0	0	0	0	#DIV/0!	#DIV/0!	#DIV/0!	#DIV/0!	NA	1	1	NA	1	1	NA	1	1	NA	1	1	NA	1	1	NA	1	1	0	0	0	0	0	0	0	0	0	0	0	0	0	0	0	0	0	0	0	0
	4933406G16Rik	4933406G16Rik|-|-|11|11 A3.1|ncRNA	NR_046037	0	0	0.0046	0.00366667	#DIV/0!	#DIV/0!	#DIV/0!	#DIV/0!	NA	1	1	-0.361269	0.5	1	1.13	0.75	1	0.0784401	0.563	1	0.619	0.848	1	1.16108	0.7113	1	0	0	0	0	0	0	0	0	0	0.023	0	0	0	0	0	0.022	0	0	0	0
	4933406I18Rik	4933406I18Rik|4933403D24Rik|-|7|7 F1|ncRNA	NR_029437	0.014	0.051	0.022	0.0343333	0.297872	1.04082	0.338462	0.686667	-0.513353	0.284	1	-0.336205	0.622	0.734	1.45	0.591	0.712	-0.161104	0.548	1	-0.609	0.688	0.813	-0.188795	0.919715	1	0.042	0	0	0.086	0.04	0.048	0.03	0	0.059	0.018	0.033	0	0	0.042	0.164	0	0	0	0.047	0.049
	4933406J10Rik	4933406J10Rik|A930009F24Rik|-|7|7 D3|ncRNA	NR_046004	0	0	0	0	0	0	#DIV/0!	#DIV/0!	NA	1	1	NA	1	1	NA	1	1	NA	1	1	NA	1	1	NA	1	1	0	0	0	0	0	0	0	0	0	0	0	0	0	0	0	0	0	0	0.043	0.023
	4933406K04Rik	4933406K04Rik|4930426M03Rik|4930485I22Rik|4933427G14Rik|-|12|12 F1|ncRNA	NR_015512	0	0	0	0	#DIV/0!	#DIV/0!	#DIV/0!	#DIV/0!	NA	1	1	NA	1	1	NA	1	1	NA	1	1	NA	1	1	NA	1	1	0	0	0	0	0	0	0	0	0	0	0	0	0	0	0	0	0	0	0	0
	4933406M09Rik	4933406M09Rik|-|-|1|1 E4|protein-coding	NM_173771	0	0.01325	0	0	#DIV/0!	#DIV/0!	0	#DIV/0!	-0.274851	0.388	1	NA	1	1	NA	1	1	-0.0607614	0.658	1	-2.21	0.484	1	NA	1	1	0	0	0	0.022	0	0	0.031	0	0	0	0	0	0	0	0	0	0	0	0	0
	4933407E24Rik	4933407E24Rik|-|-|4|4 D2.2|ncRNA	NR_045819	0.00333333	0.00725	0.0074	0.00633333	0.03663	0.0609244	0.11746	0.131944	-0.080283	0.777	1	-0.170398	0.751	1	0.701	0.843	1	0.001257	0.993	1	-0.457	0.886	1	0.499579	0.873358	1	0.01	0	0	0	0	0	0.029	0	0	0	0	0.037	0	0	0	0	0.038	0	0.091	0.119
	4933407G14Rik	4933407G14Rik|-|-|10|10 C1|ncRNA	NR_045841	0	0	0	0.0025	#DIV/0!	#DIV/0!	#DIV/0!	#DIV/0!	NA	1	1	NA	1	1	1.13	0.75	1	NA	1	1	0.619	0.848	1	0.335438	0.915169	1	0	0	0	0	0	0	0	0	0	0	0	0	0	0	0.015	0	0	0	0	0
	4933407I05Rik	4933407I05Rik|-|-|9|9 A5.3|ncRNA	NR_040731	0	0	0.029	0.042	#DIV/0!	#DIV/0!	0.0868263	1.10526	NA	1	1	-0.633484	0.308	1	3.39	0.196	0.318	0.14587	0.376	1	2.88	0.233	1	-0.315607	0.848881	1	0	0	0	0	0	0	0	0	0	0.021	0.038	0.086	0	0.143	0.023	0	0	0.086	0	0
	4933407K13Rik	4933407K13Rik|A130080L05Rik|-|X|X A7.3|ncRNA	NR_029443	0.061	0.049	0.0496	0.0326667	0.0861582	0.155063	0.406557	0.725926	0.0746431	0.881	0.938	-0.0688006	0.916	0.948	-0.682	0.422	0.558	0.0962297	0.778	0.928	-0.562	0.429	0.605	0.774124	0.356836	0.59989	0.102	0.038	0.043	0.046	0.059	0.051	0.04	0	0.016	0.034	0.097	0.101	0.044	0	0.06	0.009	0.053	0.03	0.708	0.316
	4933407L21Rik	4933407L21Rik|-|-|1|1 C5|ncRNA	NR_037692	3.75367	3.9055	4.015	4.91567	3.25839	1.86777	1.97589	1.87406	-0.20598	0.496	0.675	-0.397891	0.17	0.28	0.61	0.138	0.241	0.158359	0.531	0.823	0.376	0.316	0.494	-0.184612	0.587472	0.774778	2.635	4.055	4.571	3.29	2.616	3.822	5.894	2.898	4.65	2.678	5.019	4.83	3.711	9.242	5.351	3.928	3.178	4.084	1.152	2.091
	4933408B17Rik	4933408B17Rik|-|-|18|18 B1|protein-coding	NM_177773	0.0486667	0.02575	0.0312	0.0243333	0.10767	0.118664	0.2496	0.540741	0.361748	0.496	0.675	0.326061	0.646	0.753	-0.867	0.359	0.496	0.0927974	0.754	0.92	-0.00447	0.997	0.998	0.375961	0.695553	1	0.065	0.055	0.026	0	0.008	0.037	0.058	0.041	0.023	0.021	0.013	0.058	0.008	0.016	0.024	0.039	0.045	0.014	0.452	0.217
	4933408J17Rik	4933408J17Rik|-|-|10|10 C2|ncRNA	NR_045810	0.0476667	0.053	0.0916	0.0996667	0.208151	0.490741	0.479581	0.682648	-0.129645	0.809	0.893	-0.816749	0.21	0.331	1.24	0.219	0.345	0.326687	0.33	0.685	0.97	0.313	0.492	-0.0867913	0.917382	0.965128	0.041	0.058	0.044	0.01	0.029	0.07	0.103	0.21	0.057	0.053	0.064	0.074	0	0.204	0.149	0.116	0.019	0.11	0.229	0.108
	4933408N05Rik	4933408N05Rik|-|-|8|8 E1|ncRNA	NR_045831	0.0133333	0	0.0086	0.002	0.493827	0	#DIV/0!	0.0526316	0.171886	0.54	1	0.0770611	0.902	1	-1.38	0.678	1	0.0614787	0.649	1	0.619	0.848	1	1.03459	0.741676	1	0	0.027	0.013	0	0	0	0	0	0	0	0	0.043	0	0	0.012	0	0	0	0.027	0.028
	4933409G03Rik	4933409G03Rik|-|-|2|2 C2|protein-coding	NM_177651	0	0.00675	0	0	#DIV/0!	#DIV/0!	#DIV/0!	#DIV/0!	-0.142496	0.61	1	NA	1	1	NA	1	1	-0.01273	0.925	1	-1.12	0.727	1	NA	1	1	0	0	0	0	0.027	0	0	0	0	0	0	0	0	0	0	0	0	0	0	0
	4933409K07Rik	4933409K07Rik|AV071682|b1402|-|4|4 A5|pseudo	NR_033123	0.00166667	0	0	0	#DIV/0!	#DIV/0!	#DIV/0!	0	0.0334247	0.905	1	-0.0715375	0.894	1	-0.315	0.929	1	NA	1	1	NA	1	1	NA	1	1	0	0	0.005	0	0	0	0	0	0	0	0	0	0	0	0	0	0	0	0	0
	4933411E08Rik	4933411E08Rik|-|-|10|10 D2|ncRNA	NR_045342	0	0.008	0	0.00333333	#DIV/0!	#DIV/0!	0	#DIV/0!	-0.184404	0.51	1	NA	1	1	1.13	0.75	1	-0.0300574	0.825	1	-1.05	0.741	1	0.335438	0.915169	1	0	0	0	0	0.032	0	0	0	0	0	0	0	0	0	0	0	0	0.02	0	0
	4933411G06Rik	4933411G06Rik|-|-|10|10 B3|pseudo	NR_045158	0	0	0	0	#DIV/0!	#DIV/0!	#DIV/0!	#DIV/0!	NA	1	1	NA	1	1	NA	1	1	NA	1	1	NA	1	1	NA	1	1	0	0	0	0	0	0	0	0	0	0	0	0	0	0	0	0	0	0	0	0
	4933411K16Rik	4933411K16Rik|-|-|19|19 C3|protein-coding	NM_025752	0.0373333	0.0305	0.051	0.0223333	0.612022	1.90625	#DIV/0!	2.0303	0.0266047	0.955	0.978	-0.233065	0.757	0.84	-0.654	0.672	0.774	0.0950682	0.699	1	-0.561	0.702	0.821	1.16815	0.408065	1	0.068	0	0.044	0	0.064	0	0.058	0.07	0.038	0	0	0.147	0	0	0.04	0.044	0.026	0.024	0.061	0.016
	4933412E12Rik	4933412E12Rik|-|-|10|10 D2|ncRNA	NR_038026	0.579333	0.536	0.6004	1.21617	0.456168	0.357572	0.232894	0.287918	-0.0732131	0.846	0.915	-0.36904	0.258	0.388	1.24	0.00157	0.00559	0.231762	0.431	0.762	1.15	0.00447	0.0224	-0.852584	0.013988	0.0813564	0.608	0.542	0.588	0.219	0.63	0.718	0.577	0.388	0.6	0.587	0.612	0.815	0.422	1.429	1.909	1.062	1.23	1.245	1.27	1.499
	4933412E24Rik	4933412E24Rik|-|-|15|15 D1|protein-coding	NM_027668	0	0	0	0	#DIV/0!	#DIV/0!	#DIV/0!	#DIV/0!	NA	1	1	NA	1	1	NA	1	1	NA	1	1	NA	1	1	NA	1	1	0	0	0	0	0	0	0	0	0	0	0	0	0	0	0	0	0	0	0	0
	4933412O06Rik	4933412O06Rik|-|-|13|13 A1|ncRNA	NR_045507	0.0363333	0.182	0.136	0.2605	0.0869219	0.127719	0.184783	0.182295	-1.03845	0.0521	0.146	-1.31547	0.0749	0.142	2.94	0.00399	0.0126	-0.0619826	0.851	0.956	0.479	0.521	0.685	-0.626852	0.388799	0.6288	0.017	0	0.092	0.052	0.224	0.039	0.413	0.087	0	0.205	0.266	0.122	0.234	0	0.395	0.22	0.318	0.396	0.418	1.425
	4933413G19Rik	4933413G19Rik|-|-|6|6 F3|protein-coding	NM_027697	0.513333	0.2685	0.2586	0.520167	1.87348	1.87762	1.05984	1.8711	0.593079	0.202	0.379	0.56248	0.304	0.439	0.173	0.749	0.833	0.0856668	0.799	0.936	0.969	0.0339	0.104	-0.818913	0.0869996	0.268037	0.755	0.178	0.607	0.161	0.264	0.399	0.25	0.18	0.147	0.362	0.164	0.44	0.224	0.591	0.526	0.793	0.328	0.659	0.274	0.143
	4933413J09Rik	4933413J09Rik|GCSE|-|14|14 A3|ncRNA	NR_038005	0.00633333	0	0	0.000833333	0.126667	0	0	#DIV/0!	0.171886	0.54	1	0.160371	0.767	1	-1.38	0.678	1	NA	1	1	0.619	0.848	1	0.335438	0.915169	1	0	0.013	0.006	0	0	0	0	0	0	0	0	0	0	0	0.005	0	0	0	0.05	0.026
	4933413L06Rik	4933413L06Rik|-|-|13|13 D2.3|ncRNA	NR_045508	0	0	0	0	0	#DIV/0!	#DIV/0!	#DIV/0!	NA	1	1	NA	1	1	NA	1	1	NA	1	1	NA	1	1	NA	1	1	0	0	0	0	0	0	0	0	0	0	0	0	0	0	0	0	0	0	0.046	0
	4933415F23Rik	4933415F23Rik|-|-|1|1 A5|protein-coding	NM_025746	0.011	0.008	0	0	#DIV/0!	#DIV/0!	#DIV/0!	#DIV/0!	0.0101038	0.98	1	0.140349	0.795	1	-1.74	0.613	1	-0.0356868	0.793	1	-1.67	0.601	1	NA	1	1	0.021	0	0.012	0.022	0.01	0	0	0	0	0	0	0	0	0	0	0	0	0	0	0
	4933416C03Rik	4933416C03Rik|-|-|10|10 D2|protein-coding	NM_001161855	0	0	0	0	0	#DIV/0!	#DIV/0!	#DIV/0!	NA	1	1	NA	1	1	NA	1	1	NA	1	1	NA	1	1	NA	1	1	0	0	0	0	0	0	0	0	0	0	0	0	0	0	0	0	0	0	0.019	0
	4933416E03Rik	4933416E03Rik|-|-|2|2 H2|ncRNA	NR_040498	0	0	0	0	#DIV/0!	#DIV/0!	#DIV/0!	#DIV/0!	NA	1	1	NA	1	1	NA	1	1	NA	1	1	NA	1	1	NA	1	1	0	0	0	0	0	0	0	0	0	0	0	0	0	0	0	0	0	0	0	0
	4933416I08Rik	4933416I08Rik|-|-|X|X A5|protein-coding	NM_027700	0.0506667	0.0835	0.0998	0.0663333	0.496732	1.17606	#DIV/0!	#DIV/0!	-0.276296	0.579	0.741	-0.767457	0.308	0.443	0.672	0.699	0.796	0.190755	0.555	0.835	-0.263	0.829	0.906	0.814911	0.442146	0.670816	0.152	0	0	0	0.1	0.104	0.13	0	0.085	0.091	0.214	0.109	0	0.211	0.103	0	0.057	0.027	0.102	0.071
	4933416M06Rik	4933416M06Rik|-|-|13|13 D1|ncRNA	NR_045846	0	0	0	0	0	#DIV/0!	#DIV/0!	#DIV/0!	NA	1	1	NA	1	1	NA	1	1	NA	1	1	NA	1	1	NA	1	1	0	0	0	0	0	0	0	0	0	0	0	0	0	0	0	0	0	0	0.033	0
	4933416M07Rik	4933416M07Rik|-|-|8|8 A2|ncRNA	NR_045840	0.0266667	0.02225	0.0168	0.0238333	0.190476	0.168561	0.430769	#DIV/0!	0.0585	0.907	1	0.121071	0.871	0.918	-0.00711	0.997	0.998	-0.0152563	0.947	1	0.16	0.927	0.96	-0.300043	0.882789	1	0.025	0.028	0.027	0	0.024	0.029	0.036	0	0	0	0.039	0.045	0	0.075	0	0	0	0.068	0.14	0.132
	4933416O17Rik	4933416O17Rik|-|-|13|13 C1|ncRNA	NR_138559	0	0	0	0	#DIV/0!	#DIV/0!	#DIV/0!	#DIV/0!	NA	1	1	NA	1	1	NA	1	1	NA	1	1	NA	1	1	NA	1	1	0	0	0	0	0	0	0	0	0	0	0	0	0	0	0	0	0	0	0	0
	4933417A18Rik	4933417A18Rik|-|-|13|13 A3.3|protein-coding	NM_025750	0.0123333	0.009	0	0	#DIV/0!	#DIV/0!	#DIV/0!	#DIV/0!	-0.0129238	0.968	1	0.0372416	0.945	1	-1.08	0.759	1	-0.0160351	0.906	1	-1.2	0.709	1	NA	1	1	0.037	0	0	0.019	0.017	0	0	0	0	0	0	0	0	0	0	0	0	0	0	0
	4933417D19Rik	4933417D19Rik|-|-|8|8 E1|ncRNA	NR_045849	0.604667	0.6745	0.5882	0.864833	0.622085	0.348579	0.344783	1.0975	-0.236561	0.605	0.761	-0.289299	0.48	0.609	0.688	0.07	0.14	-0.000933437	0.998	0.999	0.387	0.418	0.595	-0.368426	0.288633	0.536318	0.872	0.438	0.504	0.127	0.512	0.883	1.176	0.478	0.391	0.481	0.923	0.668	0.534	0.956	1.099	0.553	0.989	1.058	0.972	1.935
	4933417E11Rik	4933417E11Rik|-|-|1|1 C3|ncRNA	NR_040454	0.0116667	0.00825	0	0.0308333	0.149573	0.20122	0	#DIV/0!	-0.00422316	0.988	1	0.0372416	0.945	1	1.67	0.446	0.581	-0.01273	0.925	1	1.63	0.426	1	-1.94757	0.418634	1	0.035	0	0	0	0.033	0	0	0	0	0	0	0	0.086	0	0.034	0	0.065	0	0.078	0.041
	4933417G07Rik	4933417G07Rik|-|-|3|3 C|pseudo	NR_033592	0.676	0.6175	0.6132	0.786167	2.54135	1.1629	2.22174	2.62932	-0.0214138	0.963	0.982	-0.154645	0.766	0.847	0.36	0.583	0.705	0.11514	0.715	0.907	0.326	0.52	0.683	-0.17066	0.733504	0.866339	0.179	1.119	0.73	0.465	0.411	0.857	0.737	0.407	0.499	0.376	0.93	0.854	0.098	0.945	1.115	0.995	0.817	0.747	0.266	0.531
	4933417O13Rik	4933417O13Rik|-|-|7|7 F5|ncRNA	NR_045842	0.0126667	0.02925	0.0374	0.179	0.0753968	0.134174	0.24129	1.00562	-0.302658	0.504	1	-0.500791	0.48	0.608	3.98	0.00228	0.00772	0.0481324	0.847	1	2.64	0.00813	0.0356	-2.38592	0.0321343	0.141131	0.038	0	0	0	0.035	0.028	0.054	0.128	0	0	0.059	0	0.037	0.273	0.4	0.061	0.281	0.022	0.168	0.218
	4933421I07Rik	4933421I07Rik|-|-|7|7 B3|protein-coding	NM_027702	0	0	0	0	#DIV/0!	#DIV/0!	#DIV/0!	#DIV/0!	NA	1	1	NA	1	1	NA	1	1	NA	1	1	NA	1	1	NA	1	1	0	0	0	0	0	0	0	0	0	0	0	0	0	0	0	0	0	0	0	0
	4933421O10Rik	4933421O10Rik|-|-|4 14.61 cM|4 A5|ncRNA	NR_036602	0.651333	0.6995	0.7496	0.664833	0.397882	0.435283	0.582893	0.533146	-0.288263	0.232	0.416	-0.495336	0.0287	0.0628	0.223	0.334	0.471	0.1863	0.369	0.719	-0.0845	0.704	0.822	0.290851	0.164476	0.390418	0.645	0.693	0.616	0.661	0.82	0.518	0.799	0.837	0.553	0.648	0.805	0.905	0.803	0.501	0.652	0.672	0.705	0.656	1.637	1.607
	4933422A05Rik	4933422A05Rik|-|-|9|9 A4|ncRNA	NR_040715	0	0.00825	0.0044	0.0233333	0	#DIV/0!	0.2	#DIV/0!	-0.142496	0.61	1	-0.296912	0.579	1	3.48	0.316	0.453	0.00969513	0.947	1	1.51	0.545	0.704	-1.30388	0.651285	1	0	0	0	0	0.013	0	0.02	0	0	0	0.022	0	0	0.14	0	0	0	0	0.032	0
	4933424G05Rik	4933424G05Rik|-|-|18|18 A1|ncRNA	NR_045372	0.0183333	0.01825	0.0484	0.0188333	#DIV/0!	1.40385	2.84706	0.538095	-0.0424424	0.927	1	-0.639554	0.381	0.517	0.326	0.865	0.913	0.302403	0.263	0.62	0.176	0.896	0.943	1.5474	0.292343	1	0.055	0	0	0.011	0.021	0.025	0.016	0	0.122	0	0.12	0	0.054	0	0	0.018	0.021	0.02	0	0.013
	4933424G06Rik	4933424G06Rik|1700104I15Rik|-|1|1 B|ncRNA	NR_040290	0.108333	0.18175	0.149	0.104833	0.355191	0.482095	0.943038	0.369131	-0.62316	0.225	0.407	-0.559553	0.434	0.567	0.121	0.876	0.921	-0.0427792	0.896	0.969	-0.868	0.197	0.359	0.720367	0.410405	0.64642	0.137	0.077	0.111	0.33	0.096	0.155	0.146	0	0.429	0.015	0.24	0.061	0.067	0.203	0.116	0.055	0.096	0.092	0.305	0.377
	4933425B07Rik	4933425B07Rik|-|-|14|14 C1|ncRNA	NR_046460	0.025	0	0	0	#DIV/0!	#DIV/0!	#DIV/0!	#DIV/0!	0.307423	0.321	1	0.38129	0.487	0.615	-3.12	0.354	1	NA	1	1	NA	1	1	NA	1	1	0	0	0.075	0	0	0	0	0	0	0	0	0	0	0	0	0	0	0	0	0
	4933425L06Rik	4933425L06Rik|-|-|13|13 D1|protein-coding	NM_025751	0.021	0	0	0.00533333	0.525	0	0	#DIV/0!	0.361698	0.283	1	0.374855	0.508	1	-1.9	0.463	0.597	NA	1	1	1.15	0.72	1	-0.199571	0.949398	1	0.053	0	0.01	0	0	0	0	0	0	0	0	0	0	0	0	0	0	0.032	0.04	0.01
	4933427D06Rik	4933427D06Rik|-|-|6|6 D1|ncRNA	NR_134979	0.017	0.03075	0	0.00233333	0.346939	0.361765	#DIV/0!	#DIV/0!	-0.368802	0.472	0.655	0.338276	0.537	1	-2.39	0.463	1	-0.448328	0.0685	1	-3.5	0.0156	0.0583	0.335438	0.915169	1	0.051	0	0	0.045	0.014	0.033	0.031	0	0	0	0	0	0	0	0	0	0.014	0	0.049	0.085
	4933427D14Rik	4933427D14Rik|C85113|Kiaa0753|MNR|-|11|11 B4|protein-coding	NM_028963	1.439	1.09125	0.9742	1.2875	0.163374	0.18502	0.297012	0.967318	0.200573	0.475	0.657	0.220613	0.384	0.519	-0.0293	0.929	0.956	-0.00723967	0.977	0.992	0.187	0.576	0.728	-0.201172	0.508035	0.718511	1.754	1.301	1.262	0.581	1.511	1.055	1.218	0.566	0.766	0.917	1.181	1.441	0.656	0.579	2.226	1.3	1.357	1.607	8.808	5.898
	4933427E11Rik	4933427E11Rik|-|-|15|15 D3|ncRNA	NR_033197	0.183	0.085	0.0814	0.113	1.74286	1.54545	3.39167	1.00893	0.593498	0.257	0.445	0.510554	0.455	0.587	-0.503	0.518	0.649	0.0964673	0.77	0.926	0.477	0.52	0.683	-0.201114	0.803022	0.904885	0.11	0.337	0.102	0.048	0.059	0.143	0.09	0	0.044	0.054	0.196	0.113	0.062	0.249	0.091	0.076	0.059	0.141	0.105	0.055
	4933427E13Rik	4933427E13Rik|-|-|11|11 A3.2|ncRNA	NR_045853	0.029	0.0315	0.0092	0.004	1	0.525	#DIV/0!	0.2	-0.0790955	0.864	0.926	0.260955	0.669	0.772	-2.36	0.471	1	-0.169755	0.432	1	-2.68	0.166	1	1.03459	0.741676	1	0	0.087	0	0	0.06	0.029	0.037	0	0	0	0	0.046	0	0	0	0	0.024	0	0.029	0.06
	4933427I22Rik	4933427I22Rik|-|-|4|4 D3|ncRNA	NR_045159	0.0853333	0.11775	0.5964	1.12717	0.550538	1.21392	3.976	7.88228	-0.398304	0.456	0.642	-2.76083	5.23e-09	4.24e-08	3.95	2.82e-12	4.23e-11	1.36405	5.18e-05	0.00166	3.16	3.05e-08	7.6e-07	-0.815861	0.034236	0.146869	0.056	0.125	0.075	0.184	0.235	0.032	0.02	0.497	0.503	0.417	0.671	0.894	0.64	2.061	1.074	1.232	0.986	0.77	0.155	0.097
	4933428C19Rik	4933428C19Rik|-|-|4|4 A5|ncRNA	NR_040644	0	0	0	0	#DIV/0!	#DIV/0!	#DIV/0!	#DIV/0!	NA	1	1	NA	1	1	NA	1	1	NA	1	1	NA	1	1	NA	1	1	0	0	0	0	0	0	0	0	0	0	0	0	0	0	0	0	0	0	0	0
	4933428G20Rik	4933428G20Rik|-|-|11|11 D|protein-coding	NM_001289118	3.48	2.3085	3.0362	3.8755	0.369701	0.489608	0.735514	1.50622	0.391596	0.131	0.283	-0.124079	0.599	0.714	0.313	0.183	0.302	0.466904	0.0502	0.254	0.728	0.0043	0.0217	-0.182774	0.429452	0.661321	4.007	3.284	3.149	1.504	1.971	2.654	3.105	2.337	2.025	2.887	3.46	4.472	2.782	2.262	3.847	5.38	4.271	4.711	9.413	4.715
	4933429K18Rik	4933429K18Rik|-|-|19|19 C3|ncRNA	NR_045307	0	0	0	0	0	#DIV/0!	#DIV/0!	#DIV/0!	NA	1	1	NA	1	1	NA	1	1	NA	1	1	NA	1	1	NA	1	1	0	0	0	0	0	0	0	0	0	0	0	0	0	0	0	0	0	0	0.168	0
	4933429O19Rik	4933429O19Rik|1700031B11Rik|-|14|14 C1|ncRNA	NR_033783	0	0	0	0	#DIV/0!	#DIV/0!	#DIV/0!	#DIV/0!	NA	1	1	NA	1	1	NA	1	1	NA	1	1	NA	1	1	NA	1	1	0	0	0	0	0	0	0	0	0	0	0	0	0	0	0	0	0	0	0	0
	4933430H16Rik	4933430H16Rik|-|-|7|7 D3|ncRNA	NR_045855	0	0	0	0	#DIV/0!	0	#DIV/0!	#DIV/0!	NA	1	1	NA	1	1	NA	1	1	NA	1	1	NA	1	1	NA	1	1	0	0	0	0	0	0	0	0	0	0	0	0	0	0	0	0	0	0	0	0.015
	4933430I17Rik	4933430I17Rik|bN189G18.7|-|4|4 B3|protein-coding	NM_177607	0.173667	0.092	0.1246	0.130667	0.800307	0.814159	1.8597	1.39007	0.480031	0.325	0.516	0.0323058	0.954	0.972	-0.189	0.799	0.868	0.349459	0.307	0.663	0.491	0.477	0.647	0.140485	0.831946	0.920058	0.27	0.134	0.117	0.11	0.122	0.074	0.062	0.055	0.181	0.158	0.152	0.077	0.233	0	0.146	0.209	0.061	0.135	0.217	0.113
	4933430M04Rik	4933430M04Rik|-|-|11|11 A3.2|ncRNA	NR_045857	0.00866667	0.0385	0.0184	0.0398333	0.0500963	0.213889	0.0924623	0.971545	-0.230027	0.531	1	-0.170398	0.751	1	2.1	0.376	0.512	-0.0495793	0.776	1	0.152	0.933	0.963	-0.92927	0.655293	1	0.026	0	0	0	0	0.117	0.037	0	0	0	0	0.092	0	0	0.1	0.042	0.097	0	0.173	0.18
	4933430N04Rik	4933430N04Rik|-|-|8|8 A1.1|ncRNA	NR_045854	0	0	0	0	#DIV/0!	#DIV/0!	#DIV/0!	#DIV/0!	NA	1	1	NA	1	1	NA	1	1	NA	1	1	NA	1	1	NA	1	1	0	0	0	0	0	0	0	0	0	0	0	0	0	0	0	0	0	0	0	0
	4933431E20Rik	4933431E20Rik|-|-|3|3 F2.3|ncRNA	NR_015459	20.6517	30.0487	32.3554	30.646	1.00681	1.28755	1.52706	1.31567	-0.707174	0.000566	0.00425	-0.963235	7.72e-12	8.93e-11	0.763	2.3e-05	0.000126	0.225007	0.185	0.527	0.0242	0.902	0.946	0.215104	0.157654	0.380691	20.845	22.531	18.579	30.283	39.354	23.651	26.907	25.59	31.855	35.704	30.254	38.374	35.889	26.716	35.319	28.842	27.968	29.142	20.512	23.338
	4933431G14Rik	4933431G14Rik|4930565C19Rik|-|6|6 C1|ncRNA	NR_045163	0.0226667	0.02925	0.066	0	0.338308	1.625	0.352941	0	-0.391987	0.426	0.615	-0.9895	0.191	0.306	-1.11	0.745	1	0.204904	0.511	0.811	-2.42	0.152	0.303	3.09486	0.0438644	1	0	0.068	0	0.061	0	0.034	0.022	0	0.042	0.039	0.141	0.108	0	0	0	0	0	0	0.067	0.018
	4933432G23Rik	4933432G23Rik|-|-|9|9 F3|ncRNA	NR_040716	0	0	0	0	#DIV/0!	#DIV/0!	#DIV/0!	#DIV/0!	NA	1	1	NA	1	1	NA	1	1	NA	1	1	NA	1	1	NA	1	1	0	0	0	0	0	0	0	0	0	0	0	0	0	0	0	0	0	0	0	0
	4933432I03Rik	4933432I03Rik|-|-|14|14 E2.3|ncRNA	NR_045657	0.006	0	0	0.0251667	#DIV/0!	0	0	0.292636	0.0334247	0.905	1	-0.0715375	0.894	1	1.96	0.491	1	NA	1	1	2.38	0.445	1	-1.42527	0.646192	1	0.018	0	0	0	0	0	0	0	0	0	0	0	0	0	0.122	0.029	0	0	0	0.021
	4933432I09Rik	4933432I09Rik|-|-|16|16 A3|ncRNA	NR_015575	0.119667	0.07975	0.1208	0.0796667	0.636525	0.272184	0.265495	0.796667	0.11484	0.83	0.906	-0.340622	0.63	0.74	-0.396	0.757	0.84	0.315708	0.351	0.705	-0.18	0.857	0.922	0.873015	0.392879	0.632594	0.281	0.063	0.015	0.071	0.053	0.095	0.1	0	0.078	0.12	0.306	0.1	0	0	0.231	0.045	0.026	0.176	0.188	0.293
	4933432K03Rik	4933432K03Rik|1700001C18Rik|4930433G11Rik|AI428127|-|7|7 F2|ncRNA	NR_102286	0	0	0.0922	0.0181667	#DIV/0!	#DIV/0!	#DIV/0!	#DIV/0!	NA	1	1	-1.06603	0.128	0.221	1.66	0.638	1	0.270114	0.174	1	1.15	0.72	1	2.48822	0.156893	1	0	0	0	0	0	0	0	0.164	0.269	0.028	0	0	0	0	0	0.052	0	0.057	0	0
	4933433F19Rik	4933433F19Rik|-|-|8|8 A3|ncRNA	NR_045856	0	0	0	0	#DIV/0!	#DIV/0!	#DIV/0!	#DIV/0!	NA	1	1	NA	1	1	NA	1	1	NA	1	1	NA	1	1	NA	1	1	0	0	0	0	0	0	0	0	0	0	0	0	0	0	0	0	0	0	0	0
	4933433G08Rik	4933433G08Rik|-|-|9|9 B|ncRNA	NR_105026	0	0	0.0058	0.00283333	#DIV/0!	#DIV/0!	#DIV/0!	#DIV/0!	NA	1	1	-0.296912	0.579	1	1.13	0.75	1	0.0614787	0.649	1	0.619	0.848	1	1.03459	0.741676	1	0	0	0	0	0	0	0	0	0.029	0	0	0	0	0	0	0.017	0	0	0	0
	4933433G15Rik	4933433G15Rik|4921522K19Rik|-|9|9 D|ncRNA	NR_040719	0	0	0.034	0.00533333	0	0	0.666667	#DIV/0!	NA	1	1	-0.806987	0.223	0.347	1.52	0.668	1	0.189485	0.296	1	1.01	0.754	1	1.89735	0.370623	1	0	0	0	0	0	0	0	0.085	0	0	0.026	0.059	0	0	0.032	0	0	0	0.148	0.077
	4933433G19Rik	4933433G19Rik|-|-|13|13 B3|ncRNA	NR_045851	5.692	7.80475	6.6276	6.64233	1.18214	1.47566	1.32978	1.05217	-0.629912	0.00231	0.0131	-0.532587	0.00897	0.0231	0.411	0.0523	0.11	-0.102026	0.588	0.852	-0.248	0.212	0.378	0.137819	0.475469	0.695699	5.373	6.415	5.288	8.859	7.52	7.907	6.933	8.442	5.264	7.793	6.057	5.582	5.659	6.97	5.509	7.73	6.816	7.17	4.815	5.289
	4933433H22Rik	4933433H22Rik|-|-|17|17 E4|ncRNA	NR_045458	0.026	0.01025	0.0076	0.0111667	#DIV/0!	#DIV/0!	#DIV/0!	#DIV/0!	0.267538	0.547	1	0.408475	0.547	0.67	-1.09	0.553	0.679	-0.0209817	0.901	1	0.0929	0.961	1	-0.414727	0.850666	1	0.032	0	0.046	0	0.01	0	0.031	0	0	0	0	0.038	0	0	0.031	0.017	0	0.019	0	0
	4933434E20Rik	4933434E20Rik|5730552F22Rik|AI462154|NICE-3|NS5ATP4|-|3|3 F1|protein-coding	NM_001287086	6.89033	7.24975	8.0406	7.895	0.873853	0.728325	0.717014	0.567333	-0.250022	0.198	0.374	-0.531168	0.00388	0.011	0.385	0.0499	0.106	0.261934	0.155	0.485	0.118	0.541	0.701	0.169944	0.348224	0.592227	7.425	6.44	6.806	6.19	6.064	8.173	8.572	9.913	7.34	5.969	8.209	8.772	5.513	8.388	7.767	9.426	7.841	8.435	7.885	9.954
	4933436E23Rik	4933436E23Rik|-|-|1|1 E4|ncRNA	NR_040455	0	0	0	0	#DIV/0!	#DIV/0!	#DIV/0!	#DIV/0!	NA	1	1	NA	1	1	NA	1	1	NA	1	1	NA	1	1	NA	1	1	0	0	0	0	0	0	0	0	0	0	0	0	0	0	0	0	0	0	0	0
	4933436H12Rik	4933436H12Rik|-|-|7|7 C|ncRNA	NR_046208	0	0	0	0	#DIV/0!	0	#DIV/0!	#DIV/0!	NA	1	1	NA	1	1	NA	1	1	NA	1	1	NA	1	1	NA	1	1	0	0	0	0	0	0	0	0	0	0	0	0	0	0	0	0	0	0	0	0.014
	4933436I01Rik	4933436I01Rik|-|-|X|X A7.1|protein-coding	NM_025763	0	0	0	0	#DIV/0!	#DIV/0!	#DIV/0!	#DIV/0!	NA	1	1	NA	1	1	NA	1	1	NA	1	1	NA	1	1	NA	1	1	0	0	0	0	0	0	0	0	0	0	0	0	0	0	0	0	0	0	0	0
	4933438B17Rik	4933438B17Rik|-|-|5|5 G1.2|ncRNA	NR_040685	0	0	0	0	#DIV/0!	#DIV/0!	#DIV/0!	#DIV/0!	NA	1	1	NA	1	1	NA	1	1	NA	1	1	NA	1	1	NA	1	1	0	0	0	0	0	0	0	0	0	0	0	0	0	0	0	0	0	0	0	0
	4933438K21Rik	4933438K21Rik|-|-|4 E1|4|ncRNA	NR_045446	0	0	0	0.0055	#DIV/0!	#DIV/0!	#DIV/0!	0.305556	NA	1	1	NA	1	1	1.87	0.597	1	NA	1	1	1.36	0.673	1	-0.402365	0.898051	1	0	0	0	0	0	0	0	0	0	0	0	0	0.011	0	0.022	0	0	0	0	0
	4933439C10Rik	4933439C10Rik|2610028M21Rik|-|11|11 B1.3|ncRNA	NR_015585	2.07267	2.675	1.569	1.9025	0.845296	1.27685	0.676293	0.511975	-0.516281	0.065	0.171	0.082059	0.769	0.849	0.0961	0.841	0.897	-0.536043	0.0355	0.206	-0.468	0.289	0.467	-0.171821	0.673275	0.831214	1.736	2.08	2.402	3.294	1.825	2.164	3.417	1.142	1.534	1.033	2.077	2.059	0.918	3.963	2.674	1.164	1.605	1.091	2.452	2.095
	4933439K11Rik	4933439K11Rik|-|-|1|1 H3|ncRNA	NR_040558	0.056	0.0235	0.0282	0.0878333	0.137255	0.142424	0.0996466	5.48958	0.310895	0.511	1	0.174926	0.815	0.881	0.86	0.536	0.665	0.117354	0.628	1	2.1	0.129	0.27	-1.22226	0.348421	1	0.102	0	0.066	0	0.019	0.046	0.029	0	0.057	0.052	0.032	0	0	0.282	0.138	0.033	0.038	0.036	0.408	0.165
	4933440J02Rik	4933440J02Rik|-|-|10|10 D1|ncRNA	NR_045344	0	0	0	0	#DIV/0!	#DIV/0!	#DIV/0!	#DIV/0!	NA	1	1	NA	1	1	NA	1	1	NA	1	1	NA	1	1	NA	1	1	0	0	0	0	0	0	0	0	0	0	0	0	0	0	0	0	0	0	0	0
	4933440M02Rik	4933440M02Rik|-|-|7|7 F3|ncRNA	NR_045804	0.004	0	0	0	0.16	0	#DIV/0!	#DIV/0!	0.0334247	0.905	1	-0.0715375	0.894	1	-0.315	0.929	1	NA	1	1	NA	1	1	NA	1	1	0	0	0.012	0	0	0	0	0	0	0	0	0	0	0	0	0	0	0	0.025	0.013
	5031410I06Rik	5031410I06Rik|-|-|5|5 B1|protein-coding	NM_207657	0	0	0	0	#DIV/0!	#DIV/0!	#DIV/0!	#DIV/0!	NA	1	1	NA	1	1	NA	1	1	NA	1	1	NA	1	1	NA	1	1	0	0	0	0	0	0	0	0	0	0	0	0	0	0	0	0	0	0	0	0
	5031425E22Rik	5031425E22Rik|-|-|5|5 A3|ncRNA	NR_040469	1.816	1.2395	1.8718	2.10133	0.474151	0.513676	0.505346	0.698814	0.33221	0.195	0.371	-0.355992	0.0827	0.154	0.419	0.131	0.232	0.632509	0.0046	0.0522	0.773	0.0068	0.031	-0.0500279	0.835771	0.922384	1.801	1.858	1.789	1.213	1.36	0.749	1.636	1.457	1.548	1.733	1.965	2.656	1.839	2.985	2.117	1.767	2.116	1.784	3.83	2.413
	5031425F14Rik	5031425F14Rik|-|-|2|2 H3|ncRNA	NR_015558	0.004	0.01475	0.0204	0.023	0.0384615	0.0904908	0.377778	2.55556	-0.261599	0.48	1	-0.413102	0.528	0.653	2.58	0.189	0.31	-0.0124216	0.952	1	0.488	0.742	0.849	-0.741707	0.633227	1	0.012	0	0	0.048	0.011	0	0	0.06	0	0	0	0.042	0.034	0	0.045	0.038	0	0.021	0.104	0.163
	5031426D15Rik	5031426D15Rik|-|-|2|2 A1|ncRNA	NR_027890	0.0243333	0.0565	0.0632	0.046	0.579365	0.896825	1.43636	0.92	-0.852918	0.102	0.235	-1.2648	0.0518	0.104	1.22	0.314	0.45	0.165049	0.628	0.869	-0.206	0.814	0.896	0.497595	0.554978	0.752108	0.035	0	0.038	0.065	0.042	0.029	0.09	0.032	0.027	0.035	0.109	0.113	0.019	0.176	0.031	0.02	0.03	0	0.042	0.063
	5031434C07Rik	5031434C07Rik|-|-|6|6 E3|ncRNA	NR_045987	0.0353333	0.04	0.023	0	0.218107	0.540541	0.410714	0	-0.114506	0.829	0.905	0.00487675	0.995	0.997	-3.64	0.113	0.205	-0.0692047	0.81	0.94	-3.98	0.0402	0.119	3.49953	0.0968225	1	0.045	0.051	0.01	0	0.026	0.082	0.052	0	0.025	0.047	0.043	0	0	0	0	0	0	0	0.162	0.074
	5031434O11Rik	5031434O11Rik|AI481280|Gm2370|-|3 C|3|ncRNA	NR_033624	0.047	0.17225	0.3894	0.1725	0.157191	0.503655	1.17644	0.50885	-0.913504	0.0881	0.212	-2.05918	0.00367	0.0105	1.99	0.0755	0.149	0.474167	0.161	0.493	-0.0302	0.967	0.983	1.23993	0.110959	0.311732	0.054	0	0.087	0.136	0.126	0.122	0.305	0.684	0.373	0.023	0.292	0.575	0.131	0	0.233	0.13	0.35	0.191	0.299	0.342
	5031439G07Rik	5031439G07Rik|AW554572|mKIAA0930|-|15|15 E2|protein-coding	NM_001033273	20.4113	19.585	21.0504	25.0205	0.509875	0.82083	1.27124	1.9001	-0.119402	0.522	0.696	-0.362538	0.0286	0.0626	0.493	0.00825	0.0236	0.229274	0.188	0.533	0.366	0.0491	0.137	-0.119634	0.478255	0.698046	21.953	19.502	19.779	15.161	20.826	17.459	24.894	17.244	16.536	21.236	25.29	24.946	23.099	27.623	23.172	27.403	24.771	24.055	40.032	23.86
	5033403F01Rik	5033403F01Rik|-|-|13|13 A3.3|ncRNA	NR_131019	0.128667	0.2645	0.113	0.0963333	1.02933	1.25355	1.31395	1.25108	-0.86334	0.0811	0.2	-0.0477233	0.943	0.966	-0.126	0.902	0.937	-0.684688	0.0447	0.238	-1.37	0.0477	0.134	0.193152	0.813236	0.909723	0.182	0.189	0.015	0.298	0.184	0.317	0.259	0.143	0.156	0.072	0.044	0.15	0.26	0	0.068	0.045	0.13	0.075	0.125	0.211
	5033403H07Rik	5033403H07Rik|-|-|5|5 C1|ncRNA	NR_040413	0	0	0	0	#DIV/0!	#DIV/0!	#DIV/0!	#DIV/0!	NA	1	1	NA	1	1	NA	1	1	NA	1	1	NA	1	1	NA	1	1	0	0	0	0	0	0	0	0	0	0	0	0	0	0	0	0	0	0	0	0
	5033404E19Rik	5033404E19Rik|-|-|1|1 H5|pseudo	NR_033600	0.192	0.163	0.664	0.332333	0.8	1.03822	1.7754	1.11521	0.00355175	0.995	0.998	-1.72985	0.00205	0.00624	0.943	0.28	0.414	1.1389	0.00081	0.0142	0.931	0.234	0.404	1.10964	0.0298959	0.134085	0.108	0.061	0.407	0.274	0.279	0.061	0.038	0.414	0.602	0.625	0.715	0.964	0.582	0	0.417	0.305	0.353	0.337	0.24	0.157
	5033406O09Rik	5033406O09Rik|9130204G15Rik|-|12|12 F1|ncRNA	NR_029464	0.0153333	0.017	0.0152	0.0363333	0.124661	0.265625	0.447059	0.459916	-0.0852757	0.855	1	-0.150834	0.838	0.897	1.32	0.341	0.478	0.0105992	0.966	1	0.984	0.412	0.589	-0.913726	0.466678	1	0.022	0	0.024	0.022	0.021	0.025	0	0	0	0.019	0.017	0.04	0	0.022	0.043	0.071	0.062	0.02	0.123	0.064
	5033417F24Rik	5033417F24Rik|6330419D11Rik|-|1|1 D|ncRNA	NR_138577	0.351	0.43675	0.85	1.04417	0.375401	0.379123	0.591922	0.492997	-0.379339	0.353	0.546	-1.43581	0.000845	0.00282	1.77	1.67e-05	9.43e-05	0.768245	0.0155	0.123	1.3	0.000838	0.00579	-0.1838	0.632611	0.80683	0.348	0.23	0.475	0.218	0.336	0.464	0.729	0.836	0.627	0.334	1.356	1.097	0.722	1.721	1.077	0.891	1.013	0.841	0.935	1.152
	5033428I22Rik	5033428I22Rik|-|-|8|8 B2|ncRNA	NR_131041	0	0.0095	0.035	0.0386667	#DIV/0!	#DIV/0!	1.12903	#DIV/0!	-0.142496	0.61	1	-0.521486	0.386	0.521	3.52	0.163	0.276	0.0695998	0.696	1	1.74	0.393	1	-0.697345	0.691546	1	0	0	0	0	0.038	0	0	0.103	0	0	0	0.072	0.099	0	0.097	0	0	0.036	0	0
	5330411J11Rik	5330411J11Rik|-|-|2|2 C1.1|ncRNA	NR_040510	0.0233333	0.03325	0.0108	0.0143333	0.128205	0.205247	0.2	0.223958	-0.225402	0.649	0.793	0.0621279	0.919	0.95	-0.548	0.805	0.873	-0.163364	0.505	1	-1.23	0.343	0.522	0.279186	0.897063	1	0.07	0	0	0.035	0.022	0.026	0.05	0	0	0	0.054	0	0	0	0.045	0.019	0.022	0	0.182	0.162
	5330413P13Rik	5330413P13Rik|-|-|2 F1|2|ncRNA	NR_029381	0.121667	0.12025	0.1274	0.332333	0.691288	0.41041	0.301896	0.443703	-0.124304	0.794	0.885	-0.416473	0.357	0.493	1.6	0.000541	0.00217	0.172226	0.608	0.858	1.42	0.00435	0.0218	-1.12659	0.00473212	0.0383485	0.079	0.172	0.114	0.032	0.237	0.107	0.105	0.081	0.132	0.163	0.148	0.113	0.119	0.281	0.621	0.348	0.315	0.31	0.176	0.293
	5330417C22Rik	5330417C22Rik|BB183350|-|3|3 F3|protein-coding	NM_001346518	1.41367	1.03275	0.9394	1.90133	0.372508	0.189079	0.15709	0.362573	0.241687	0.491	0.671	0.225629	0.333	0.469	0.566	0.0785	0.154	0.028056	0.922	0.976	0.842	0.0304	0.0961	-0.804384	0.00493252	0.0396526	1.621	1.574	1.046	0.313	1.43	1.025	1.363	0.519	1.041	1.122	0.985	1.03	1.152	0.7	2.747	2.055	2.477	2.277	3.795	5.462
	5330434G04Rik	5330434G04Rik|-|-|X D|X|ncRNA	NR_015552	0.232333	0.2315	0.168	0.182333	0.143504	0.164184	0.190692	0.554205	-0.124398	0.765	0.867	0.0760527	0.859	0.912	-0.167	0.755	0.838	-0.161094	0.614	0.86	-0.324	0.522	0.685	0.0755456	0.871319	0.941254	0.327	0.137	0.233	0.079	0.292	0.302	0.253	0.113	0.124	0.176	0.268	0.159	0.272	0.033	0.209	0.179	0.114	0.287	1.619	1.41
	5330439B14Rik	5330439B14Rik|-|-|6|6 G2|ncRNA	NR_037679	0.0183333	0.0355	0	0	0.0856698	0.159193	0	0	-0.240162	0.597	1	0.195074	0.72	1	-2.07	0.546	1	-0.182803	0.321	1	-3.22	0.159	1	NA	1	1	0.055	0	0	0.028	0	0.094	0.02	0	0	0	0	0	0	0	0	0	0	0	0.214	0.223
	5430401F13Rik	5430401F13Rik|-|-|6|6 F3|protein-coding	NM_001244628	0	0	0	0	#DIV/0!	#DIV/0!	#DIV/0!	#DIV/0!	NA	1	1	NA	1	1	NA	1	1	NA	1	1	NA	1	1	NA	1	1	0	0	0	0	0	0	0	0	0	0	0	0	0	0	0	0	0	0	0	0
	5430402E10Rik	5430402E10Rik|OBP2|-|X|X B|protein-coding	NM_027768	0	0	0	0	#DIV/0!	#DIV/0!	#DIV/0!	#DIV/0!	NA	1	1	NA	1	1	NA	1	1	NA	1	1	NA	1	1	NA	1	1	0	0	0	0	0	0	0	0	0	0	0	0	0	0	0	0	0	0	0	0
	5430402O13Rik	5430402O13Rik|3110047M22Rik|-|6|6 B2.3|ncRNA	NR_027892	0.24	0.34875	0.7706	0.8485	0.48	0.775	1.29079	1.42366	-0.480377	0.286	0.477	-1.7129	0.000208	0.000796	1.98	0.00146	0.00523	0.90695	0.00385	0.0463	1.34	0.0121	0.048	-0.0473746	0.923676	0.967821	0.245	0.321	0.154	0.373	0.345	0.416	0.261	0.625	0.625	0.49	1.239	0.874	0.939	1.855	0.827	0.69	0.343	0.437	0.5	0.45
	5430403N17Rik	5430403N17Rik|5430403N17|-|8|8 A4|ncRNA	NR_046181	0.05	0.00625	0.0142	0.00916667	1.51515	0.240385	0.405714	0.763889	1.01403	0.0504	0.142	0.846774	0.26	0.39	-2.23	0.147	0.253	0.164335	0.468	1	0.773	0.727	1	0.829118	0.647382	1	0.06	0.017	0.073	0.008	0	0.017	0	0	0.021	0	0.023	0.027	0	0	0.043	0.012	0	0	0.033	0.026
	5430405H02Rik	5430405H02Rik|2610307N17Rik|-|2|2 H1|ncRNA	NR_015591	2.60733	2.05125	1.6374	1.29767	0.971074	0.929008	1.11616	0.869167	0.145487	0.502	0.68	0.342804	0.21	0.331	-0.82	0.00979	0.0273	-0.172267	0.462	0.781	-0.672	0.0181	0.0654	0.479317	0.118396	0.323385	2.485	2.669	2.668	2.192	1.918	1.927	2.168	1.879	1.909	1.067	2.017	1.315	0.883	1.832	1.887	1.125	0.971	1.088	2.685	2.208
	5430416N02Rik	5430416N02Rik|100041797|Adapt33|Gm3514|-|5|5 E4|ncRNA	NR_034038	6.14833	3.76975	2.113	2.27183	0.464727	0.384002	0.315939	0.326788	0.471949	0.0801	0.198	1.19158	2.47e-05	0.000113	-1.24	0.016	0.0413	-0.586306	0.0273	0.176	-0.732	0.131	0.273	0.0249356	0.956991	0.98353	5.935	6.472	6.038	3.377	4.824	2.233	4.645	2.043	1.372	1.558	2.733	2.859	0.603	4.199	4.101	1.538	1.321	1.869	13.23	9.817
	5430416O09Rik	5430416O09Rik|AI481365|-|4|4 B1|ncRNA	NR_033355	0.005	0.00425	0.0124	0.00416667	0.060241	0.0559211	0.213793	0.0661376	-0.00273513	0.995	1	-0.571289	0.435	0.567	-0.199	0.934	1	0.180067	0.417	1	-0.215	0.923	1	1.83394	0.348848	1	0.005	0	0.01	0	0.004	0	0.013	0	0	0	0.029	0.033	0	0	0	0.008	0.017	0	0.083	0.076
	5430419D17Rik	5430419D17Rik|-|-|7|7 F3|protein-coding	NM_175166	0	0.00225	0.0068	0.00316667	#DIV/0!	#DIV/0!	#DIV/0!	#DIV/0!	-0.0897196	0.748	1	-0.296912	0.579	1	1.8	0.611	1	0.0359416	0.804	1	0.567	0.86	1	0.364809	0.907257	1	0	0	0	0	0	0	0.009	0.034	0	0	0	0	0	0	0.019	0	0	0	0	0
	5430421F17Rik	5430421F17Rik|-|-|8|8 A2|ncRNA	NR_040352	0.006	0.00575	0.015	0.0135	0.107143	0.575	0.294118	0.3375	-0.0231856	0.941	1	-0.468341	0.497	0.624	1.35	0.543	0.671	0.127638	0.509	1	1.06	0.603	1	0.388621	0.813619	1	0	0	0.018	0	0.023	0	0	0	0.046	0.029	0	0	0.033	0	0.032	0	0.016	0	0.056	0.01
	5430425K12Rik	5430425K12Rik|-|-|13|13 C3|ncRNA	NR_103550	0	0	0	0	#DIV/0!	0	#DIV/0!	#DIV/0!	NA	1	1	NA	1	1	NA	1	1	NA	1	1	NA	1	1	NA	1	1	0	0	0	0	0	0	0	0	0	0	0	0	0	0	0	0	0	0	0	0.018
	5430427M07Rik	5430427M07Rik|-|-|12|12 D3|ncRNA	NR_045858	0.0203333	0.01625	0	0.00566667	#DIV/0!	#DIV/0!	#DIV/0!	#DIV/0!	0.0120007	0.974	1	0.166465	0.759	1	-1.42	0.68	1	-0.0420933	0.758	1	-1.33	0.635	1	0.335438	0.915169	1	0	0	0.061	0.038	0	0	0.027	0	0	0	0	0	0	0	0	0	0	0.034	0	0
	5430427O19Rik	5430427O19Rik|-|-|X|X C1|protein-coding	NM_001163539	0	0.014	0.0332	0.0696667	0	0.823529	0.481159	0.881857	-0.627968	0.143	1	-2.5164	0.000821	0.00275	6.37	2.18e-05	0.00012	0.440263	0.174	0.511	2.37	0.0122	0.0484	-1.01667	0.17344	0.402134	0	0	0	0.005	0.028	0.023	0	0.051	0.014	0.034	0.031	0.036	0.151	0	0.043	0.088	0.074	0.062	0.011	0.017
	5430428K19Rik	5430428K19Rik|-|-|X|X A1.1|ncRNA	NR_045426	0	0	0	0	#DIV/0!	#DIV/0!	#DIV/0!	#DIV/0!	NA	1	1	NA	1	1	NA	1	1	NA	1	1	NA	1	1	NA	1	1	0	0	0	0	0	0	0	0	0	0	0	0	0	0	0	0	0	0	0	0
	5430431A17Rik	5430431A17Rik|-|-|7|7 B3|ncRNA	NR_131001	0	0.0085	0.0042	0.0208333	#DIV/0!	0.151786	0.113514	0.121832	-0.0897196	0.748	1	-0.296912	0.579	1	2.3	0.514	1	0.0284681	0.834	1	1.06	0.702	1	-0.330116	0.910271	1	0	0	0	0	0	0	0.034	0	0	0.021	0	0	0	0	0	0.039	0	0.086	0	0.056
	5430434I15Rik	5430434I15Rik|-|-|3|3 B|ncRNA	NR_040541	0	0	0	0	#DIV/0!	#DIV/0!	#DIV/0!	#DIV/0!	NA	1	1	NA	1	1	NA	1	1	NA	1	1	NA	1	1	NA	1	1	0	0	0	0	0	0	0	0	0	0	0	0	0	0	0	0	0	0	0	0
	5430437J10Rik	5430437J10Rik|-|-|15|15 A1|ncRNA	NR_045274	0.00533333	0.0095	0.0118	0	0.0730594	0.5	#DIV/0!	#DIV/0!	-0.0914408	0.768	1	-0.170398	0.751	1	-0.315	0.929	1	0.0116174	0.942	1	-1.28	0.691	1	1.51548	0.6292	1	0.016	0	0	0	0.015	0	0.023	0	0	0	0	0.059	0	0	0	0	0	0	0.073	0.019
	5430440P10Rik	5430440P10Rik|-|-|14|14 E2.3|ncRNA	NR_045859	0.042	0.0375	0.024	0.026	1	0.568182	0.413793	0.218487	0.00552745	0.991	1	0.0503272	0.945	0.967	-0.536	0.745	0.829	-0.0114318	0.962	1	-0.513	0.714	0.829	0.437053	0.785452	1	0	0.085	0.041	0	0.053	0.043	0.054	0	0	0.032	0.088	0	0	0.037	0.055	0.03	0	0.034	0.042	0.066
	5530400C23Rik	5530400C23Rik|GRP|-|6|6 G1|protein-coding	NM_027784	0	0	0	0	#DIV/0!	#DIV/0!	#DIV/0!	#DIV/0!	NA	1	1	NA	1	1	NA	1	1	NA	1	1	NA	1	1	NA	1	1	0	0	0	0	0	0	0	0	0	0	0	0	0	0	0	0	0	0	0	0
	5530401A14Rik	5530401A14Rik|-|-|11|11 B5|ncRNA	NR_038010	0	0.01725	0.009	0.0221667	#DIV/0!	#DIV/0!	0.5625	#DIV/0!	-0.323392	0.341	1	-0.415912	0.442	1	3.69	0.0956	0.18	-0.0204858	0.909	1	0.47	0.764	0.864	-0.651222	0.716995	1	0	0	0	0	0.01	0	0.059	0	0	0.045	0	0	0.061	0	0	0.034	0.019	0.019	0	0
	5530601H04Rik	5530601H04Rik|AI835882|-|X|X D|ncRNA	NR_015467	0.621667	0.63475	0.4132	0.503833	0.358103	0.50337	0.414859	0.341814	-0.193495	0.507	0.683	0.286642	0.268	0.4	-0.143	0.642	0.753	-0.419991	0.0861	0.354	-0.356	0.245	0.416	-0.137631	0.614839	0.793807	0.758	0.571	0.536	0.359	0.736	0.604	0.84	0.445	0.4	0.343	0.383	0.495	0.261	0.436	0.837	0.57	0.479	0.44	1.736	1.261
	5730403I07Rik	5730403I07Rik|-|-|9|9 D|ncRNA	NR_040378	0	0	0.0096	0.0123333	#DIV/0!	0	#DIV/0!	0.822222	NA	1	1	-0.296912	0.579	1	2.83	0.315	1	0.0614787	0.649	1	2.33	0.369	1	-0.700112	0.737358	1	0	0	0	0	0	0	0	0.048	0	0	0	0	0	0	0.009	0.03	0.035	0	0	0.033
	5730405O15Rik	5730405O15Rik|-|-|X|X A1.1|ncRNA	NR_038158	0.152667	0.08975	0.0684	0.05	0.28805	0.509943	0.1368	0.265957	0.266023	0.62	0.771	0.43416	0.552	0.674	-1.46	0.223	0.349	-0.0455538	0.885	0.966	-0.956	0.363	0.541	0.781164	0.492786	1	0.216	0.219	0.023	0.088	0.142	0.098	0.031	0	0.12	0.111	0.034	0.077	0	0.086	0.063	0.07	0.081	0	0.53	0.176
	5730408K05Rik	5730408K05Rik|2610018C13Rik|-|19|19 A|ncRNA	NR_027866	0.422667	0.51625	0.4018	0.446833	0.475441	8.90086	0.871584	1.61896	-0.216177	0.687	0.818	-0.132604	0.856	0.91	0.264	0.776	0.853	-0.0478965	0.866	0.959	-0.169	0.872	0.93	-0.0564994	0.958566	0.984183	0.548	0.505	0.215	0	0.234	0.339	1.492	0	0.139	0	0.622	1.248	0	0.888	0.819	0.241	0.466	0.267	0.889	0.058
	5730409E04Rik	5730409E04Rik|7530403E16Rik|AI849033|-|4|4 D2.2|protein-coding	NM_001013755	19.5903	13.9867	14.4682	21.7312	0.617816	0.328451	0.379753	0.539034	0.288042	0.195	0.37	0.103372	0.384	0.519	0.321	0.109	0.201	0.185165	0.292	0.65	0.62	0.00489	0.024	-0.419506	0.0085502	0.0582951	21.129	20.738	16.904	9.203	13.558	13.975	19.211	13.785	14.556	14.229	14.992	14.779	14.162	19.588	30.562	19.308	25.983	20.784	31.709	42.584
	5730412P04Rik	5730412P04Rik|-|-|X|X F1|ncRNA	NR_045425	0	0.006	0	0.049	#DIV/0!	#DIV/0!	#DIV/0!	0.304348	0.0402704	0.886	1	0.0372416	0.945	1	1.77	0.365	0.502	0.00913838	0.946	1	2.31	0.208	1	-2.07477	0.312204	1	0	0	0	0	0.024	0	0	0	0	0	0	0	0	0	0.025	0.082	0.142	0.045	0	0
	5730416F02Rik	5730416F02Rik|-|-|X|X D|pseudo	NR_033596	0	0.01325	0	0.00766667	#DIV/0!	#DIV/0!	0	#DIV/0!	-0.0897196	0.748	1	NA	1	1	1.52	0.668	1	0.00913838	0.946	1	0.287	0.929	1	-0.0545342	0.986171	1	0	0	0	0	0	0.053	0	0	0	0	0	0	0	0	0.046	0	0	0	0	0
	5730420D15Rik	5730420D15Rik|-|-|10|10 C2|ncRNA	NR_045339	0	0.01175	0	0.00716667	#DIV/0!	0.618421	#DIV/0!	#DIV/0!	-0.142496	0.61	1	NA	1	1	1.57	0.656	1	-0.0216425	0.873	1	-0.54	0.852	1	-0.110734	0.971918	1	0	0	0	0	0	0	0.047	0	0	0	0	0	0	0	0.016	0.027	0	0	0	0.019
	5730422E09Rik	5730422E09Rik|-|-|5|5 G3|ncRNA	NR_015478	0.135333	0.075	0.0696	0.092	0.604167	0.362319	1.0087	0.69697	0.422633	0.408	0.599	0.574661	0.374	0.51	-0.41	0.546	0.673	-0.0357647	0.915	0.974	0.232	0.744	0.85	-0.335731	0.664129	0.827137	0.112	0.126	0.168	0.034	0.136	0.051	0.079	0.171	0	0.067	0.07	0.04	0.077	0	0.108	0.144	0.083	0.14	0.224	0.207
	5730435O14Rik	5730435O14Rik|-|-|10|10 B2|ncRNA	NR_045341	0	0.00725	0	0.01	#DIV/0!	0.100694	#DIV/0!	0.4	-0.0897196	0.748	1	NA	1	1	1.52	0.668	1	0.00913838	0.946	1	0.287	0.929	1	-0.0545342	0.986171	1	0	0	0	0	0.029	0	0	0	0	0	0	0	0	0	0.06	0	0	0	0	0.072
	5730455P16Rik	5730455P16Rik|-|-|11|11 B5|protein-coding	NM_027472	7.342	7.90625	7.9634	7.48183	0.404496	0.473712	0.561792	0.691418	-0.281575	0.242	0.427	-0.437498	0.035	0.0746	0.191	0.514	0.645	0.139349	0.486	0.796	-0.107	0.698	0.819	0.260602	0.285314	0.533078	9.079	5.82	7.127	6.437	11.02	7.882	6.286	8.003	9.051	9.738	5.614	7.411	8.967	2.932	8.477	8.817	7.625	8.073	18.151	16.69
	5730460C07Rik	5730460C07Rik|-|-|3|3 H3|ncRNA	NR_045801	0	0	0	0	#DIV/0!	#DIV/0!	#DIV/0!	#DIV/0!	NA	1	1	NA	1	1	NA	1	1	NA	1	1	NA	1	1	NA	1	1	0	0	0	0	0	0	0	0	0	0	0	0	0	0	0	0	0	0	0	0
	5730480H06Rik	5730480H06Rik|-|-|5|5 B3|ncRNA	NR_045500	0.367	0.4675	0.2714	0.535333	0.233164	0.21856	0.147661	0.263451	-0.451581	0.202	0.379	0.136094	0.752	0.836	0.644	0.342	0.48	-0.487122	0.11	0.405	0.112	0.851	0.918	-0.776353	0.199503	0.435973	0.43	0.385	0.286	0.303	0.425	0.576	0.566	0.282	0.123	0.208	0.31	0.434	0.043	0.109	0.906	0.676	0.886	0.592	1.574	2.139
	5730488B01Rik	5730488B01Rik|-|-|4|4 B1|ncRNA	NR_073462	0	0	0	0	#DIV/0!	#DIV/0!	#DIV/0!	#DIV/0!	NA	1	1	NA	1	1	NA	1	1	NA	1	1	NA	1	1	NA	1	1	0	0	0	0	0	0	0	0	0	0	0	0	0	0	0	0	0	0	0	0
	5730507C01Rik	5730507C01Rik|-|-|12|12 A1.2|protein-coding	NM_001033157	0.00266667	0	0.0024	0	0.0386473	0	0.2	#DIV/0!	0.0334247	0.905	1	-0.170398	0.751	1	-0.315	0.929	1	0.0614787	0.649	1	NA	1	1	1.51548	0.6292	1	0.008	0	0	0	0	0	0	0	0	0	0.012	0	0	0	0	0	0	0	0.069	0.009
	5730508B09Rik	5730508B09Rik|2700063A17Rik|C80506|-|3|3 G2|protein-coding	NM_027482	5.60967	2.01275	1.4864	0.824333	0.506516	0.492115	0.534292	0.426012	1.22296	3.04e-08	9.72e-07	1.56531	9.08e-15	1.41e-13	-2.53	2.5e-12	3.77e-11	-0.281626	0.179	0.519	-1.25	0.000307	0.00254	0.941394	0.00321655	0.0297975	5.971	6.116	4.742	1.991	1.84	1.599	2.621	1.709	1.332	1.723	1.173	1.495	1.3	1.04	0.727	0.79	0.491	0.598	11.075	4.09
	5730522E02Rik	5730522E02Rik|-|-|11|11 A3.2-A3.3|ncRNA	NR_027973	0.214667	0.143	0.0746	0.111667	0.113942	0.148033	0.116199	0.38639	0.293814	0.543	0.713	0.998853	0.109	0.195	-0.854	0.395	0.531	-0.419613	0.222	0.573	-0.442	0.611	0.755	-0.397638	0.674807	0.83235	0.341	0.099	0.204	0.077	0.19	0.143	0.162	0.064	0.07	0.065	0.039	0.135	0	0	0.268	0.122	0.212	0.068	1.884	0.966
	5730559C18Rik	5730559C18Rik|1700034M08Rik|4933426C09Rik|AI586180|D1Mgi54|-|1 E4|1|protein-coding	NM_028872	2.57633	2.42625	1.657	1.63533	2.24224	1.7281	1.26008	2.24326	-0.0770685	0.789	0.882	0.288778	0.101	0.183	-0.505	0.0179	0.0454	-0.331482	0.165	0.498	-0.592	0.0346	0.106	0.211539	0.267825	0.514142	2.762	2.406	2.561	1.177	2.523	2.396	3.609	1.236	1.703	1.797	1.706	1.843	1.117	0.957	2.152	1.817	1.961	1.808	1.149	1.404
	5830411N06Rik	5830411N06Rik|Scart2|-|7|7 F4|protein-coding	NM_175533	0	0	0	0	#DIV/0!	0	#DIV/0!	#DIV/0!	NA	1	1	NA	1	1	NA	1	1	NA	1	1	NA	1	1	NA	1	1	0	0	0	0	0	0	0	0	0	0	0	0	0	0	0	0	0	0	0	0.008
	5830416I19Rik	5830416I19Rik|-|-|5|5 C3.1|ncRNA	NR_045384	0.0176667	0.004	0.0328	0.0261667	#DIV/0!	0.0677966	0.324752	0.654167	0.359772	0.378	1	-0.690487	0.352	0.488	0.745	0.579	0.702	0.574195	0.0418	1	3.16	0.0462	0.131	0.460057	0.643659	0.813816	0.029	0	0.024	0	0	0.016	0	0.037	0.02	0.044	0.011	0.052	0	0.072	0.035	0.023	0.014	0.013	0	0.059
	5830417I10Rik	5830417I10Rik|3632445O20Rik|AA387005|-|3|3 F1|pseudo	NR_028359	0.541667	0.5275	0.46	0.4445	0.476819	0.985981	0.929293	2.04839	-0.158539	0.491	0.671	-0.0823358	0.682	0.782	-0.133	0.727	0.817	-0.0730737	0.718	0.908	-0.304	0.393	0.571	0.220631	0.487847	0.703959	0.593	0.574	0.458	0.611	0.488	0.587	0.424	0.418	0.391	0.511	0.361	0.619	0.446	0.096	0.448	0.606	0.487	0.584	1.136	0.535
	5830418P13Rik	5830418P13Rik|-|-|9 55.37 cM|9 F1|ncRNA	NR_040466	0.177	0.79875	0.9698	1.09533	1.80612	2.1131	1.93187	3.09416	-2.00589	5.58e-08	1.67e-06	-2.6748	5.31e-18	1.12e-16	2.81	1.18e-09	1.26e-08	0.382599	0.137	0.457	0.473	0.245	0.416	-0.0141235	0.966752	0.987021	0.193	0.139	0.199	0.393	0.801	0.798	1.203	0.899	0.907	1.125	1.069	0.849	0.44	1.583	0.799	1.262	0.838	1.65	0.098	0.378
	5830428M24Rik	5830428M24Rik|100040862|Gm3007|-|12|12 C2|ncRNA	NR_038060	0	0	0	0.005	0	#DIV/0!	#DIV/0!	#DIV/0!	NA	1	1	NA	1	1	1.13	0.75	1	NA	1	1	0.619	0.848	1	0.335438	0.915169	1	0	0	0	0	0	0	0	0	0	0	0	0	0	0	0	0.03	0	0	0.041	0
	5830432E09Rik	5830432E09Rik|-|-|7|7 F3|ncRNA	NR_015548	0.135	0.1135	0.08	0.0866667	0.236427	0.272837	0.253165	0.570175	0.0743379	0.884	0.939	0.498005	0.476	0.606	-0.439	0.562	0.687	-0.220437	0.503	0.807	-0.325	0.638	0.775	-0.284376	0.752229	0.876664	0.192	0.144	0.069	0.052	0.108	0.203	0.091	0.196	0.036	0.011	0.02	0.137	0.113	0	0.074	0.124	0.072	0.137	0.571	0.416
	5830444B04Rik	5830444B04Rik|-|-|4|4 E2|ncRNA	NR_102287	0.383	0.26225	0.2958	0.455	0.845475	0.586689	0.56129	1.0782	0.28312	0.493	0.673	-0.00913758	0.986	0.991	0.486	0.328	0.465	0.256522	0.424	0.757	0.82	0.0403	0.119	-0.457956	0.311275	0.55978	0.235	0.649	0.265	0.261	0.241	0.242	0.305	0.055	0.179	0.303	0.483	0.459	0.513	0.761	0.444	0.328	0.359	0.325	0.453	0.447
	5830454E08Rik	5830454E08Rik|-|-|9|9 F4|ncRNA	NR_073359	0.559	0.447	0.9034	0.8925	0.8125	0.879921	1.19814	1.02	0.118062	0.823	0.902	-0.886744	0.0566	0.112	0.835	0.0634	0.129	0.561361	0.102	0.388	1.04	0.109	0.242	0.155627	0.686707	0.838397	0.721	0.29	0.666	0	0.266	0.642	0.88	0.658	0.789	0.486	1.204	1.38	0.782	0.509	1.343	0.664	0.769	1.288	0.688	0.508
	5830473C10Rik	5830473C10Rik|Arg|Gm17754|-|5|5 E1|protein-coding	NM_001252661	0.073	0.027	0.0048	0.0055	0.201102	0.0967742	0.369231	0.392857	0.600179	0.263	0.451	1.57035	0.0378	0.0796	-3.78	0.00804	0.0232	-0.224643	0.318	1	-2.53	0.127	0.266	0.494675	0.854434	1	0.094	0.097	0.028	0	0.04	0.019	0.049	0	0.024	0	0	0	0	0.017	0	0	0.016	0	0.363	0.279
	5930403L14Rik	5930403L14Rik|-|-|4|4 E2|ncRNA	NR_045643	13.9143	30.2877	49.1154	37.7465	5.44166	5.64438	5.15485	3.79591	-1.26152	4.26e-09	1.64e-07	-2.11515	6.48e-46	7.46e-44	1.62	3.71e-15	7.34e-14	0.780357	1.96e-07	1.47e-05	0.303	0.117	0.254	0.518983	0.000225295	0.0042494	11.509	15.631	14.603	35.708	29.153	30.921	25.369	45.633	43.771	52.855	49.304	54.014	43.46	31.735	38.559	44.782	33.126	34.817	2.557	5.366
	5930412G12Rik	5930412G12Rik|-|-|5|5 G1.3|ncRNA	NR_015517	2.29033	4.92675	3.0088	1.548	5.37637	3.48426	2.09381	1.9064	-1.18791	4.77e-05	0.000545	-0.685531	0.00589	0.016	-0.361	0.419	0.555	-0.508295	0.0307	0.189	-1.66	4.33e-05	0.000487	1.07649	0.00228129	0.0231442	1.791	2.177	2.903	6.434	3.006	4.822	5.445	2.563	2.885	2.262	3.748	3.586	0.718	3.009	2.054	1.156	1.085	1.266	0.426	1.414
	5930430L01Rik	5930430L01Rik|-|-|5|5 G3|ncRNA	NR_102384	0.0763333	0.08925	0.1636	0.294167	0.641457	0.550926	0.521019	0.951996	-0.342931	0.464	0.649	-1.31965	0.00592	0.016	2.16	7.25e-05	0.00036	0.712594	0.0253	0.169	1.7	0.00033	0.00269	-0.668117	0.121723	0.328421	0.112	0.036	0.081	0.054	0.131	0.073	0.099	0.137	0.105	0.225	0.217	0.134	0.588	0.159	0.336	0.251	0.23	0.201	0.119	0.162
	5930438M14Rik	5930438M14Rik|5930438M14|-|13|13 D1|ncRNA	NR_046158	0.0136667	0.02125	0.008	0.00366667	0.00596798	0.291096	0.0173913	0.0591398	-0.174005	0.703	0.829	0.12296	0.861	0.913	-1.56	0.505	1	-0.11409	0.585	1	-2.33	0.256	1	1.19476	0.604016	1	0.024	0	0.017	0	0	0.018	0.067	0	0	0	0.012	0.028	0	0	0.008	0	0	0.014	2.29	0.073
	6030407O03Rik	6030407O03Rik|-|-|1|1 C3|ncRNA	NR_045311	0.190333	0.3145	0.2346	0.302167	0.471122	1.69086	1.77727	5.92484	-0.729631	0.0793	0.197	-0.594957	0.231	0.357	0.909	0.174	0.291	-0.14386	0.647	0.879	-0.0027	0.996	0.998	-0.229156	0.68662	0.838397	0.139	0.156	0.276	0.336	0.22	0.338	0.364	0.109	0.297	0.21	0.366	0.191	0.24	0.801	0.268	0.155	0.159	0.19	0.404	0.186
	6030408B16Rik	6030408B16Rik|AI225877|-|15|15 F1-F2|ncRNA	NR_033803	0.027	0.04425	0.0268	0.0296667	1.22727	0.560127	1.78667	1.28986	-0.379194	0.478	0.66	-0.149532	0.842	0.901	0.221	0.87	0.916	-0.157966	0.607	0.858	-0.642	0.552	0.71	0.0638452	0.958652	1	0.049	0.011	0.021	0.01	0.046	0.066	0.055	0	0.027	0.008	0.03	0.069	0	0	0.009	0.063	0.054	0.052	0.022	0.079
	6030419C18Rik	6030419C18Rik|-|-|9|9 B|protein-coding	NM_176921	26.4617	27.4908	31.2202	44.0803	0.806439	0.515455	0.474363	0.861213	-0.221137	0.32	0.511	-0.534936	0.029	0.0634	0.924	4.27e-05	0.000223	0.278327	0.228	0.579	0.688	0.00211	0.0122	-0.367209	0.117611	0.322362	24.966	25.058	29.361	22.809	23.067	25.114	38.973	18.202	25.675	27.943	40.029	44.252	34.52	52.069	49.788	35.696	41.739	50.67	32.813	53.333
	6030440G07Rik	6030440G07Rik|-|-|12|12 F1|ncRNA	NR_036598	0	0	0	0.00283333	#DIV/0!	#DIV/0!	#DIV/0!	#DIV/0!	NA	1	1	NA	1	1	1.13	0.75	1	NA	1	1	0.619	0.848	1	0.335438	0.915169	1	0	0	0	0	0	0	0	0	0	0	0	0	0	0	0.017	0	0	0	0	0
	6030443J06Rik	6030443J06Rik|1700030G06Rik|-|5|5 A3|ncRNA	NR_102315	0.0406667	0.01825	0.0326	0.016	0.589372	0.396739	0.534426	0.666667	0.490612	0.36	0.552	-0.048262	0.945	0.967	-1.15	0.263	0.396	0.475594	0.161	0.492	-0.125	0.883	0.936	1.27403	0.0892742	0.272021	0.004	0.099	0.019	0.009	0.021	0.03	0.013	0.023	0.025	0.049	0.034	0.032	0.017	0.017	0.009	0.029	0.008	0.016	0.069	0.046
	6030458C11Rik	6030458C11Rik|-|-|15|15 A1|protein-coding	NM_029998	5.45367	4.956	5.1206	5.90967	0.548879	0.483607	0.505788	0.63668	-0.0561661	0.745	0.856	-0.240607	0.116	0.205	0.291	0.0401	0.0892	0.179062	0.219	0.571	0.23	0.0923	0.215	-0.0418543	0.753977	0.877428	6.177	5.261	4.923	4.649	5.595	5.116	4.464	4.58	5.455	6.069	4.433	5.066	5.621	4.101	6.65	6.094	6.688	6.304	9.936	10.248
	6030466F02Rik	6030466F02Rik|-|-|8|8 E1|ncRNA	NR_040702	0	0	0.0136	0.0396667	#DIV/0!	0	0.647619	#DIV/0!	NA	1	1	-0.296912	0.579	1	4.35	0.189	0.309	0.0614787	0.649	1	3.83	0.213	0.378	-2.17538	0.402803	1	0	0	0	0	0	0	0	0.068	0	0	0	0	0	0.238	0	0	0	0	0	0.016
	6030468B19Rik	6030468B19Rik|-|-|11|11 E2|protein-coding	NM_029964	0	0	0.0092	0.028	#DIV/0!	0	0.328571	2	NA	1	1	-0.399094	0.457	1	3.19	0.238	0.367	0.0893704	0.511	1	2.68	0.28	1	-0.597216	0.784071	1	0	0	0	0	0	0	0	0	0	0.046	0	0	0	0.071	0	0	0.033	0.064	0	0.083
	6030469F06Rik	6030469F06Rik|-|-|12|12 A2|ncRNA	NR_102715	0	0	0	0	#DIV/0!	#DIV/0!	#DIV/0!	#DIV/0!	NA	1	1	NA	1	1	NA	1	1	NA	1	1	NA	1	1	NA	1	1	0	0	0	0	0	0	0	0	0	0	0	0	0	0	0	0	0	0	0	0
	6030471H07Rik	6030471H07Rik|-|-|4|4 C4|ncRNA	NR_130998	0	0	0	0	#DIV/0!	#DIV/0!	#DIV/0!	#DIV/0!	NA	1	1	NA	1	1	NA	1	1	NA	1	1	NA	1	1	NA	1	1	0	0	0	0	0	0	0	0	0	0	0	0	0	0	0	0	0	0	0	0
	6030498E09Rik	6030498E09Rik|-|-|X|X A3.3|protein-coding	NM_183126	0.0706667	0.01325	0	0.00266667	#DIV/0!	#DIV/0!	#DIV/0!	0.205128	0.646703	0.193	0.368	0.985751	0.161	0.268	-3.37	0.0797	0.155	-0.0361105	0.791	1	-1.21	0.689	1	0.335438	0.915169	1	0.016	0.091	0.105	0	0.03	0	0.023	0	0	0	0	0	0	0	0.016	0	0	0	0	0
	6230400D17Rik	6230400D17Rik|-|-|14|14 A3|ncRNA	NR_029446	0.263667	0.26575	0.1882	0.233	0.137398	0.310093	0.257104	0.429889	-0.151425	0.751	0.859	0.130007	0.829	0.891	0.0577	0.927	0.954	-0.189229	0.582	0.85	-0.154	0.783	0.877	-0.217167	0.730198	0.864722	0.422	0.198	0.171	0.125	0.363	0.199	0.376	0	0.294	0.106	0.164	0.377	0.258	0.382	0.357	0.113	0.131	0.157	1.919	0.857
	6330403K07Rik	6330403K07Rik|AI415455|AV161034|UGS148|-|11|11 B4|protein-coding	NM_134022	75.4377	32.2903	56.3686	99.8012	0.720258	0.433741	0.428835	0.440678	0.983735	9.47e-05	0.000974	0.0901239	0.697	0.795	0.607	0.0393	0.0876	0.814361	0.000792	0.014	1.65	6.66e-08	1.57e-06	-0.691999	0.0113743	0.07095	76.431	83.289	66.593	20.365	28.293	30.496	50.007	83.45	42.189	38.294	59.567	58.343	53.789	143.779	113.477	97.528	104.776	85.458	104.737	74.446
	6330407A03Rik	6330407A03Rik|-|-|4|4 A1|ncRNA	NR_028126	0	0	0	0	#DIV/0!	#DIV/0!	#DIV/0!	#DIV/0!	NA	1	1	NA	1	1	NA	1	1	NA	1	1	NA	1	1	NA	1	1	0	0	0	0	0	0	0	0	0	0	0	0	0	0	0	0	0	0	0	0
	6330408A02Rik	6330408A02Rik|-|-|7|7 A1|protein-coding	NM_177312	2.01267	1.6765	1.8424	2.81067	0.672009	0.666335	0.718005	0.923954	0.0667129	0.736	0.851	-0.201597	0.273	0.406	0.653	0.00338	0.0109	0.261106	0.104	0.392	0.72	0.000288	0.00241	-0.446724	0.0176986	0.0950589	2.401	1.86	1.777	1.476	1.901	1.699	1.63	1.928	1.371	2.037	1.934	1.942	2.971	1.539	3.663	2.674	3.268	2.749	2.995	2.516
	6330409D20Rik	6330409D20Rik|AA517851|-|2|2 B|protein-coding	NM_027529	1.01767	0.2825	0.2614	0.42	0.483682	0.155819	0.167457	0.234637	1.30042	0.00398	0.0203	1.44078	0.00274	0.00811	-1.12	0.0531	0.112	0.0387649	0.909	0.973	0.565	0.344	0.523	-0.49537	0.369244	0.611222	0.669	1.699	0.685	0.087	0.258	0.272	0.513	0.263	0.335	0.177	0.348	0.184	0.084	0.475	0.846	0.304	0.32	0.491	2.104	1.813
	6330410L21Rik	6330410L21Rik|-|-|3|3 G3|ncRNA	NR_040589	0	0.00525	0.005	0	#DIV/0!	0.875	0.625	0	-0.239099	0.427	1	-0.296912	0.579	1	NA	1	1	-0.0368854	0.836	1	-1.99	0.53	1	1.51548	0.6292	1	0	0	0	0	0.014	0	0.007	0.025	0	0	0	0	0	0	0	0	0	0	0	0.006
	6330415B21Rik	6330415B21Rik|-|-|6|6 C3|ncRNA	NR_045141	0.003	0.016	0.007	0.00266667	#DIV/0!	#DIV/0!	0.538462	#DIV/0!	-0.415919	0.326	1	-0.375663	0.536	1	0.166	0.963	1	-0.0562509	0.803	1	-2.28	0.271	1	1.7971	0.517666	1	0.009	0	0	0	0.032	0.02	0.012	0	0	0.022	0.013	0	0	0	0	0	0.016	0	0	0
	6330415G19Rik	6330415G19Rik|-|-|17|17 A3.3|ncRNA	NR_126485	2.68233	1.82625	1.527	2.2495	1.17853	0.814563	1.15682	1.21332	0.329142	0.343	0.536	0.395156	0.221	0.345	-0.102	0.749	0.833	-0.0464589	0.877	0.963	0.273	0.456	0.629	-0.319982	0.326317	0.573487	3.118	2.547	2.382	1.403	1.244	1.315	3.343	0.846	1.308	1.635	2.366	1.48	1.001	1.966	2.374	2.893	3.093	2.17	2.276	2.242
	6330418K02Rik	6330418K02Rik|-|-|5|5 G2|ncRNA	NR_045821	5.18233	5.3625	5.9462	6.111	1.83381	1.70022	1.98604	1.37049	-0.223918	0.389	0.582	-0.504546	0.035	0.0746	0.458	0.222	0.348	0.249788	0.246	0.601	0.211	0.534	0.695	0.0688246	0.821193	0.913574	4.269	5.359	5.919	6.288	4.448	6.105	4.609	6.348	4.69	5.199	7.665	5.829	5.023	10.857	6.202	5.384	4.205	4.995	2.826	3.154
	6330549D23Rik	6330549D23Rik|-|-|3|3 F2.1|pseudo	NR_003619	1.454	1.224	0.845	0.853333	0.946615	0.956998	0.638218	0.688727	0.0411026	0.858	0.922	0.401002	0.134	0.231	-0.607	0.00433	0.0135	-0.32137	0.172	0.509	-0.568	0.00759	0.0338	0.199498	0.416849	0.652264	1.601	1.339	1.422	1.436	1.289	1.073	1.098	0.553	1.017	1.224	0.706	0.725	0.669	0.508	1.078	0.992	0.858	1.015	1.536	1.279
	6430411K18Rik	6430411K18Rik|PEG11as|-|12|12 F1|ncRNA	NR_002848	0.206667	0.42475	0.6006	0.412833	0.0724892	0.165659	0.357287	0.44343	-0.94885	0.0361	0.111	-0.7176	0.337	0.472	1.15	0.242	0.373	0.113594	0.673	0.89	-0.0919	0.909	0.95	0.698567	0.616981	0.795355	0.087	0.376	0.157	0.399	0.382	0.297	0.621	0	0.162	0	1.178	1.663	0.028	0.604	1.447	0.188	0.054	0.156	2.851	2.564
	6430503K07Rik	6430503K07Rik|-|-|2|2 G2|ncRNA	NR_108091	0.411	0.849	0.7654	1.129	2.65161	2.62037	14.1741	4.55242	-0.976752	0.0256	0.0856	-1.04418	0.0319	0.069	1.66	0.00407	0.0129	-0.0427031	0.894	0.968	0.413	0.403	0.581	-0.455398	0.348374	0.592233	0.348	0.471	0.414	0.815	0.687	0.553	1.341	0.89	1.069	0.539	0.706	0.623	0.512	2.345	0.808	1.068	1.107	0.934	0.155	0.324
	6430531B16Rik	6430531B16Rik|Gm1093|-|7|7 F4|protein-coding	NM_001347613	0.328	0.21675	0.206	0.463833	1.4386	0.547348	0.710345	0.637134	0.289195	0.555	0.722	0.20303	0.738	0.826	0.695	0.152	0.26	0.0709408	0.835	0.95	1.11	0.033	0.102	-0.940055	0.0938101	0.28057	0.358	0.442	0.184	0.052	0.353	0.194	0.268	0	0.143	0.103	0.479	0.305	0.284	0.709	0.495	0.578	0.351	0.366	0.228	0.396
	6430548M08Rik	6430548M08Rik|AW049007|Kiaa0513|mKIAA0513|-|8|8 E1|protein-coding	NM_001163760	9.81433	11.207	14.9912	26.9583	0.452691	0.350844	0.28365	0.582077	-0.353272	0.126	0.274	-0.907333	4.7e-05	0.000204	1.61	1.65e-15	3.39e-14	0.488993	0.0327	0.196	1.24	7.8e-08	1.8e-06	-0.676594	0.00205745	0.0215536	10.817	9.481	9.145	6.999	12.307	10.194	15.328	9.567	11.864	13.976	16.974	22.575	17.471	17.444	38.316	26.697	30.252	31.57	21.68	31.943
	6430550D23Rik	6430550D23Rik|-|-|2|2 H1|protein-coding	NM_001145352	0.234667	0.192	0.2308	0.158167	1.73827	13.7143	6.23784	0.970348	0.0781071	0.866	0.928	-0.364746	0.442	0.574	-0.217	0.637	0.75	0.301285	0.372	0.722	-0.12	0.809	0.894	0.635605	0.150051	0.369326	0.194	0.287	0.223	0.198	0.103	0.138	0.329	0.186	0.203	0.125	0.379	0.261	0.167	0.12	0.2	0.196	0.136	0.13	0.135	0.014
	6430562O15Rik	6430562O15Rik|-|-|13|13 D1|ncRNA	NR_015515	1.89533	1.918	1.744	2.52633	0.780937	0.73262	1.00751	0.931195	-0.170843	0.579	0.741	-0.177762	0.478	0.607	0.586	0.0209	0.0519	0.000158165	1	1	0.396	0.188	0.349	-0.395774	0.102053	0.296113	1.933	1.775	1.978	1.423	1.096	2.747	2.406	1.76	1.239	1.316	2.061	2.344	1.492	2.902	3.199	2.294	2.511	2.76	2.427	2.618
	6430571L13Rik	6430571L13Rik|-|-|9|9 F1|protein-coding	NM_175486	0.942	0.51325	0.6344	1.05	0.536141	0.406052	0.476276	0.753228	0.62566	0.0465	0.134	0.226729	0.425	0.558	0.34	0.391	0.528	0.369719	0.177	0.516	1.03	0.00938	0.0396	-0.561712	0.113971	0.316927	0.968	1.081	0.777	0.343	0.501	0.375	0.834	0.614	0.816	0.483	0.749	0.51	0.434	1.486	1.727	0.848	1.094	0.711	1.757	1.264
	6430573F11Rik	6430573F11Rik|Kiaa1456|TRM9L|-|8|8 A4|protein-coding	NM_176952	2.883	5.24	5.7392	6.37167	1.03519	1.21465	1.38427	1.2365	-1.00527	4.51e-05	0.00052	-1.29752	1.16e-11	1.32e-10	1.34	9.01e-06	5.31e-05	0.235248	0.192	0.538	0.276	0.318	0.496	-0.0220367	0.924087	0.967936	2.394	3.627	2.628	6.319	5.907	4.216	4.518	5.151	5.591	6.544	4.878	6.532	9.726	4.737	7.701	5.673	5.589	4.804	2.785	4.314
	6430584L05Rik	6430584L05Rik|6430584L05|-|6|6 B3|ncRNA	NR_046179	0.469	0.50075	0.6888	0.705167	0.54157	0.307775	0.27563	0.459392	-0.260805	0.351	0.544	-0.872852	0.00155	0.00487	0.751	0.022	0.0542	0.54926	0.0146	0.119	0.466	0.106	0.237	0.156036	0.578158	0.768549	0.473	0.574	0.36	0.413	0.462	0.523	0.605	0.465	0.914	0.703	0.624	0.738	0.5	0.468	1.343	0.577	0.714	0.629	0.866	1.627
	6430706D22Rik	6430706D22Rik|-|-|-|ncRNA	NR_040291	13.193	6.99025	5.2274	6.68883	0.571571	0.591742	0.585572	0.91515	0.695699	0.000462	0.0036	0.9946	1.17e-07	7.93e-07	-0.816	9.55e-05	0.00046	-0.271148	0.0731	0.321	-0.0965	0.557	0.714	-0.190424	0.243829	0.484435	17.099	10.803	11.677	6.05	6.977	7.728	7.206	4.567	4.543	4.675	5.417	6.935	5.22	4.775	10.074	6.749	7.03	6.285	23.082	11.813
	6430710C18Rik	6430710C18Rik|5033406J01Rik|-|2|2 C3|ncRNA	NR_102349	0.007	0	0	0	#DIV/0!	0	#DIV/0!	#DIV/0!	0.0334247	0.905	1	-0.0715375	0.894	1	-0.315	0.929	1	NA	1	1	NA	1	1	NA	1	1	0	0	0.021	0	0	0	0	0	0	0	0	0	0	0	0	0	0	0	0	0.022
	6530402F18Rik	6530402F18Rik|mKIAA1857|-|2|2 B|ncRNA	NR_029460	5.01867	2.90225	3.0842	2.3695	0.529619	0.50872	0.800675	0.941773	0.575561	0.0302	0.097	0.375898	0.108	0.193	-0.9	4.61e-06	2.86e-05	0.198022	0.409	0.748	-0.288	0.222	0.39	0.520173	0.0104267	0.0669422	5.631	4.118	5.307	2.018	2.726	2.272	4.593	2.116	2.234	2.889	3.741	4.441	2.5	2.07	2.968	2.463	2.203	2.013	9.476	5.705
	6530403H02Rik	6530403H02Rik|-|-|3|3 G1|ncRNA	NR_130170	0.144	0.03725	0.0486	0.0676667	0.346988	0.163377	0.796721	0.473193	1.27924	0.00703	0.0316	1.16798	0.0309	0.0669	-0.805	0.412	0.548	0.186089	0.588	0.852	0.943	0.325	0.504	-0.475853	0.592713	0.778623	0.132	0.215	0.085	0.025	0.032	0.022	0.07	0.075	0.055	0.029	0.031	0.053	0	0.243	0.047	0.063	0.027	0.026	0.415	0.228
	6530411M01Rik	6530411M01Rik|-|-|17|17 A1|ncRNA	NR_027881	2.40467	2.1945	1.2162	0.7315	4.04146	2.56068	2.78945	1.30859	-0.0562761	0.845	0.914	0.61028	0.0578	0.114	-1.51	0.000158	0.000726	-0.577532	0.028	0.179	-1.58	9.31e-06	0.000129	0.86768	0.0180286	0.0961565	1.79	2.899	2.525	2.65	1.564	2.102	2.462	1.124	0.701	1.16	1.861	1.235	0.677	1.243	0.759	0.76	0.557	0.393	0.595	0.857
	6720468P15Rik	6720468P15Rik|-|-|19|19 D2|ncRNA	NR_040307	0.0773333	0.02825	0.016	0.0426667	0.346786	0.14196	0.103896	0.235727	0.366672	0.447	0.634	0.638127	0.377	0.513	-0.722	0.595	0.716	-0.0355608	0.849	1	0.605	0.676	0.803	-1.18893	0.468503	1	0.071	0.161	0	0	0	0.032	0.081	0	0.08	0	0	0	0	0	0.083	0.069	0.053	0.051	0.223	0.199
	6720483E21Rik	6720483E21Rik|-|-|1|1 A4|ncRNA	NR_040492	0.084	0.07575	0.0398	0.0583333	2.21053	1.89375	0.750943	0.432099	0.0293294	0.956	0.979	0.385628	0.61	0.724	-0.384	0.744	0.829	-0.173365	0.569	0.843	-0.263	0.77	0.868	-0.36192	0.739197	1	0.086	0	0.166	0.035	0.064	0.155	0.049	0.087	0	0.059	0.053	0	0.067	0	0.099	0.028	0.064	0.092	0.038	0.04
	6720489N17Rik	6720489N17Rik|9330128I06|-|13|13 B3|protein-coding	NM_173381	1.74633	1.73725	1.8284	1.00583	1.11373	2.39952	2.30277	4.0722	-0.185065	0.435	0.624	-0.370528	0.0563	0.112	-0.589	0.277	0.411	0.168052	0.383	0.73	-0.783	0.11	0.242	0.975547	0.0243276	0.11783	2.103	1.649	1.487	2.124	1.84	1.497	1.488	1.853	1.739	2.024	1.425	2.101	2.026	0.172	0.575	1.416	0.718	1.128	1.568	0.724
	6820408C15Rik	6820408C15Rik|-|-|2|2 G3|protein-coding	NM_177656	0.979	1.0315	0.653	0.931833	1.16409	0.947199	1.02835	1.13224	-0.187835	0.646	0.792	0.299831	0.457	0.589	0.1	0.821	0.884	-0.388619	0.209	0.561	-0.129	0.76	0.863	-0.4228	0.243047	0.483836	1.029	0.489	1.419	0.314	1.182	1.245	1.385	1.169	0.414	0.579	0.571	0.532	1.256	0.566	0.796	1.051	0.491	1.431	0.841	1.089
	6820431F20Rik	6820431F20Rik|-|-|8|8 A2|pseudo	NR_030708	0.055	0.0435	0.0512	0.0206667	0.176849	0.315217	0.898246	0.574074	0.0878199	0.854	0.92	-0.131119	0.824	0.887	-1.15	0.125	0.224	0.143659	0.675	0.891	-1.02	0.118	0.254	1.33267	0.0598585	0.211366	0.074	0.06	0.031	0.038	0.058	0.037	0.041	0.084	0.092	0.039	0.026	0.015	0.036	0.008	0.024	0.033	0.008	0.015	0.311	0.138
	7420426K07Rik	7420426K07Rik|-|-|9|9 E3.3|protein-coding	NM_001033983	0	0	0	0	#DIV/0!	#DIV/0!	#DIV/0!	#DIV/0!	NA	1	1	NA	1	1	NA	1	1	NA	1	1	NA	1	1	NA	1	1	0	0	0	0	0	0	0	0	0	0	0	0	0	0	0	0	0	0	0	0
	7420461P10Rik	7420461P10Rik|ENSMUSG00000073516|-|1 H2.1|1|protein-coding	NM_001177581	0.611	1.86325	5.2904	4.94667	3.51149	4.12223	8.80266	8.0303	-1.50214	8.75e-05	0.00091	-3.17567	1.09e-16	2.03e-15	3.14	6.36e-11	7.91e-10	1.29922	3.15e-06	0.000155	1.36	0.000594	0.00434	0.288384	0.442251	0.670912	0.312	0.848	0.673	1.242	1.538	2.711	1.962	6.108	5.071	2.275	5.752	7.246	2.674	2.52	11.349	4.107	5.872	3.158	0.174	0.452
[truncated: 23,156 more rows]
[truncated: 2 more columns]

## Sheet: Figure 1-Source Data 1B
Related to	Figure 1-figure supplement 1	Complete list of GO terms (Biological Process) identified for astrocyte enriched genes at each developmental time point as indicated
[truncated: 976 more rows]
[truncated: 6 more columns]
