# Supplementary material for: Activity-dependent modulation of synapse-regulating genes in astrocytes
Source: eLife. 2021 Sep 8;10:e70514. doi: 10.7554/eLife.70514 (PMC8497060; doi:10.7554/eLife.70514)
Supplement: Figure 3—source data 1. — Full statistical analysis of synaptic protein VGLUT1, VGLUT2, GLUA1, GLUA2 changes during development. Each comparison (e.g., comparison between ages within each layer) is labeled accordingly. In each table, statistical comparison between ages within each layer (top), as well as between layers at each age (bottom), are shown. [file elife-70514-fig3-data1.xlsx]

## Sheet: Figure 3-Source Data 1
Related to	Figure 3, Figure 3-figure supplement 1	Spatio-temporal profiling of synaptic proteins expression levels (Vglut1, VGlut2, GluA1, GluA2) - full statistical analysis
VGlut1 thresholded signal/ area (μm2)													VGlut2 thresholded signal/ area (μm2)													GluA1 puncta number/ volume (μm3)													GluA2 puncta number/ volume (μm3)
Comparison between ages within each layer													Comparison between ages within each layer													Comparison between ages within each layer													Comparison between ages within each layer
Layer1	Age	Mean	Std. Error of Mean	N	Median		Tukey's multiple comparisons test	Fold change (gr2/gr1)	Significant?	Adjusted P Value			Layer1	Age	Mean	Std. Error of Mean	N	Median		Tukey's multiple comparisons test	Fold change (gr2/gr1)	Significant?	Adjusted P Value			Layer1	Age	Mean	Std. Error of Mean	N	Median		Tukey's multiple comparisons test	Fold change (gr2/gr1)	Significant?	Adjusted P Value			Layer1	Age	Mean	Std. Error of Mean	N	Median		Tukey's multiple comparisons test	Fold change (gr2/gr1)	Significant?	Adjusted P Value
	P1	0.002056	0.001007	3	0.001068		P1 vs. P4	2.20768	No	>0.9999				P1	0.007797	0.005397	4	0.002982		P1 vs. P4	6.42427	No	0.6277				P1	0.0708	0.01141	3	0.06403		P1 vs. P4	1.31102	No	0.7872				P1	0.07291	0.01152	3	0.06191		P1 vs. P4	1.27911	No	0.8957
	P4	0.004539	0.0008197	3	0.003988		P1 vs. P7	11.323	No	0.9032				P4	0.05009	0.01217	3	0.03868		P1 vs. P7	12.1932	No	0.0564				P4	0.09282	0.01149	3	0.1002		P1 vs. P7	1.68503	No	0.1188				P4	0.09326	0.007841	3	0.08948		P1 vs. P7	0.947332	No	>0.9999
	P7	0.02328	0.003549	4	0.0232		P1 vs. P14	44.3337	Yes	0.0079				P7	0.09507	0.02344	3	0.1125		P1 vs. P14	20.059	Yes	0.0011				P7	0.1193	0.003084	3	0.1214		P1 vs. P14	1.63136	No	0.1682				P7	0.06907	0.02054	3	0.06246		P1 vs. P14	2.52366	Yes	0.0011
	P14	0.09115	0.0137	4	0.09254		P1 vs. P21	35.6372	No	0.0572				P14	0.1564	0.01732	3	0.1652		P1 vs. P21	11.3685	No	0.0849				P14	0.1155	0.01173	3	0.1038		P1 vs. P21	1.60169	No	0.2022				P14	0.184	0.02193	3	0.1745		P1 vs. P21	1.95035	Yes	0.037
	P21	0.07327	0.01175	3	0.07405		P1 vs. P28	59.7763	Yes	0.001				P21	0.08864	0.01094	3	0.08425		P1 vs. P28	25.3944	Yes	<0.0001				P21	0.1134	0.006085	3	0.1079		P1 vs. P28	2.00565	Yes	0.0131				P21	0.1422	0.002055	3	0.1432		P1 vs. P28	2.09711	Yes	0.0148
	P28	0.1229	0.03447	3	0.09472		P4 vs. P7	5.12888	No	0.9397				P28	0.198	0.03883	3	0.1978		P4 vs. P7	1.89798	No	0.6324				P28	0.142	0.02082	3	0.1555		P4 vs. P7	1.28528	No	0.6445				P28	0.1529	0.007037	3	0.1493		P4 vs. P7	0.740618	No	0.8122
							P4 vs. P14	20.0815	Yes	0.0098										P4 vs. P14	3.12238	Yes	0.0255										P4 vs. P14	1.24434	No	0.7676										P4 vs. P14	1.97298	Yes	0.0059
							P4 vs. P21	16.1423	No	0.0697										P4 vs. P21	1.76961	No	0.7584										P4 vs. P21	1.22172	No	0.828										P4 vs. P21	1.52477	No	0.1987
	ANOVA summary						P4 vs. P28	27.0764	Yes	0.0012				ANOVA summary						P4 vs. P28	3.95288	Yes	0.002				ANOVA summary						P4 vs. P28	1.52984	No	0.1119				ANOVA summary						P4 vs. P28	1.6395	No	0.0843
	P value	0.0002					P7 vs. P14	3.91538	Yes	0.032				P value	0.0001					P7 vs. P14	1.6451	No	0.3289				P value	0.0218					P7 vs. P14	0.968148	No	>0.9999				P value	0.0003					P7 vs. P14	2.66396	Yes	0.0008
	Significant diff. among means (P < 0.05)?	Yes					P7 vs. P21	3.14734	No	0.2191				Significant diff. among means (P < 0.05)?	Yes					P7 vs. P21	0.932366	No	>0.9999				Significant diff. among means (P < 0.05)?	Yes					P7 vs. P21	0.950545	No	0.9992				Significant diff. among means (P < 0.05)?	Yes					P7 vs. P21	2.05878	Yes	0.0266
							P7 vs. P28	5.27921	Yes	0.0031										P7 vs. P28	2.08268	Yes	0.0314										P7 vs. P28	1.19028	No	0.7681										P7 vs. P28	2.2137	Yes	0.0106
							P14 vs. P21	0.80384	No	0.95										P14 vs. P21	0.566752	No	0.2396										P14 vs. P21	0.981818	No	>0.9999										P14 vs. P21	0.772826	No	0.3328
							P14 vs. P28	1.34833	No	0.6541										P14 vs. P28	1.26598	No	0.7001										P14 vs. P28	1.22944	No	0.645										P14 vs. P28	0.830978	No	0.6192
							P21 vs. P28	1.67736	No	0.2828										P21 vs. P28	2.23375	Yes	0.0212										P21 vs. P28	1.2522	No	0.575										P21 vs. P28	1.07525	No	0.9929
Layer2	Age	Mean	Std. Error of Mean	N	Median		Tukey's multiple comparisons test	Fold change (gr2/gr1)	Significant?	Adjusted P Value			Layer2	Age	Mean	Std. Error of Mean	N	Median		Tukey's multiple comparisons test	Fold change (gr2/gr1)	Significant?	Adjusted P Value			Layer2	Age	Mean	Std. Error of Mean	N	Median		Tukey's multiple comparisons test	Fold change (gr2/gr1)	Significant?	Adjusted P Value			Layer2	Age	Mean	Std. Error of Mean	N	Median		Tukey's multiple comparisons test	Fold change (gr2/gr1)	Significant?	Adjusted P Value
	P1	0.002033	0.001264	3	0.001332		P1 vs. P4	0.837186	No	>0.9999				P1	0.001585	0.0008229	4	0.00094		P1 vs. P4	2.89148	No	0.5429				P1	0.01035	0.003157	3	0.007796		P1 vs. P4	3.2029	No	0.0703				P1	0.01016	0.005959	3	0.005791		P1 vs. P4	1.32283	No	0.9991
	P4	0.001702	0.0005195	3	0.001941		P1 vs. P7	8.59321	No	0.9101				P4	0.004583	0.0005238	3	0.0041		P1 vs. P7	5.27445	Yes	0.0183				P4	0.03315	0.003875	3	0.03517		P1 vs. P7	5.4657	Yes	0.0004				P4	0.01344	0.002946	3	0.01271		P1 vs. P7	3.35039	No	0.1802
	P7	0.01747	0.002319	4	0.01666		P1 vs. P14	46.2961	Yes	0.0004				P7	0.00836	0.002258	3	0.01041		P1 vs. P14	5.40505	Yes	0.0148				P7	0.05657	0.004617	3	0.06012		P1 vs. P14	8.45604	Yes	<0.0001				P7	0.03404	0.003915	3	0.03022		P1 vs. P14	8.52264	Yes	<0.0001
	P14	0.09412	0.009612	4	0.09369		P1 vs. P21	39.941	Yes	0.0031				P14	0.008567	0.001165	3	0.00765		P1 vs. P21	1.56025	No	0.9948				P14	0.08752	0.001517	3	0.08829		P1 vs. P21	6.30145	Yes	<0.0001				P14	0.08659	0.002344	3	0.08624		P1 vs. P21	11.565	Yes	<0.0001
	P21	0.0812	0.006442	3	0.07557		P1 vs. P28	56.1731	Yes	0.0001				P21	0.002473	0.000489	3	0.00203		P1 vs. P28	3.82334	No	0.1742				P21	0.06522	0.004923	3	0.06604		P1 vs. P28	8.47246	Yes	<0.0001				P21	0.1175	0.01334	3	0.1278		P1 vs. P28	12.3622	Yes	<0.0001
	P28	0.1142	0.02671	3	0.09632		P4 vs. P7	10.2644	No	0.9028				P28	0.00606	0.00172	3	0.00754		P4 vs. P7	1.82413	No	0.3788				P28	0.08769	0.009156	3	0.09634		P4 vs. P7	1.70649	No	0.0609				P28	0.1256	0.004169	3	0.129		P4 vs. P7	2.53274	No	0.3
							P4 vs. P14	55.2996	Yes	0.0004										P4 vs. P14	1.8693	No	0.3272										P4 vs. P14	2.64012	Yes	<0.0001										P4 vs. P14	6.44271	Yes	<0.0001
							P4 vs. P21	47.7086	Yes	0.003										P4 vs. P21	0.539603	No	0.8595										P4 vs. P21	1.96742	Yes	0.0081										P4 vs. P21	8.74256	Yes	<0.0001
	ANOVA summary						P4 vs. P28	67.0975	Yes	<0.0001				ANOVA summary						P4 vs. P28	1.32228	No	0.9639				ANOVA summary						P4 vs. P28	2.64525	Yes	<0.0001				ANOVA summary						P4 vs. P28	9.34524	Yes	<0.0001
	P value	<0.0001					P7 vs. P14	5.38752	Yes	0.0011				P value	0.0065					P7 vs. P14	1.02476	No	>0.9999				P value	<0.0001					P7 vs. P14	1.54711	Yes	0.0105				P value	<0.0001					P7 vs. P14	2.54377	Yes	0.0012
	Significant diff. among means (P < 0.05)?	Yes					P7 vs. P21	4.64797	Yes	0.0105				Significant diff. among means (P < 0.05)?	Yes					P7 vs. P21	0.295813	No	0.0656				Significant diff. among means (P < 0.05)?	Yes					P7 vs. P21	1.15291	No	0.8302				Significant diff. among means (P < 0.05)?	Yes					P7 vs. P21	3.45182	Yes	<0.0001
							P7 vs. P28	6.53692	Yes	0.0002										P7 vs. P28	0.72488	No	0.813										P7 vs. P28	1.55011	Yes	0.0101										P7 vs. P28	3.68978	Yes	<0.0001
							P14 vs. P21	0.862728	No	0.9551										P14 vs. P21	0.288666	No	0.0541										P14 vs. P21	0.745201	No	0.0787										P14 vs. P21	1.35697	No	0.0538
							P14 vs. P28	1.21334	No	0.7788										P14 vs. P28	0.707365	No	0.7564										P14 vs. P28	1.00194	No	>0.9999										P14 vs. P28	1.45051	Yes	0.0124
							P21 vs. P28	1.4064	No	0.3877										P21 vs. P28	2.45047	No	0.4303										P21 vs. P28	1.34453	No	0.0756										P21 vs. P28	1.06894	No	0.9465
Layer4	Age	Mean	Std. Error of Mean	N	Median		Tukey's multiple comparisons test	Fold change (gr2/gr1)	Significant?	Adjusted P Value			Layer4	Age	Mean	Std. Error of Mean	N	Median		Tukey's multiple comparisons test	Fold change (gr2/gr1)	Significant?	Adjusted P Value			Layer4-5	Age	Mean	Std. Error of Mean	N	Median		Tukey's multiple comparisons test	Fold change (gr2/gr1)	Significant?	Adjusted P Value			Layer4-5	Age	Mean	Std. Error of Mean	N	Median		Tukey's multiple comparisons test	Fold change (gr2/gr1)	Significant?	Adjusted P Value
	P1	0.001836	0.001192	3	0.0009654		P1 vs. P4	0.654139	No	>0.9999				P1	0.001835	0.001176	4	0.0009		P1 vs. P4	20.3706	No	0.7829				P1	0.009614	0.001067	3	0.009975		P1 vs. P4	5.20699	Yes	0.0016				P1	0.01208	0.001973	3	0.01047		P1 vs. P4	2.25414	No	0.6139
	P4	0.001201	0.00011	3	0.001143		P1 vs. P7	6.25272	No	0.9861				P4	0.03738	0.00796	3	0.03804		P1 vs. P7	59.673	Yes	0.0173				P4	0.05006	0.005163	3	0.05471		P1 vs. P7	6.32827	Yes	0.0002				P4	0.02723	0.003107	3	0.02945		P1 vs. P7	4.1904	Yes	0.0152
	P7	0.01148	0.0017	4	0.01221		P1 vs. P14	54.5207	Yes	0.0002				P7	0.1095	0.03351	3	0.1391		P1 vs. P14	72.0981	Yes	0.004				P7	0.06084	0.001898	3	0.05999		P1 vs. P14	7.76888	Yes	<0.0001				P7	0.05062	0.002559	3	0.04886		P1 vs. P14	7.62169	Yes	<0.0001
	P14	0.1001	0.007349	4	0.1038		P1 vs. P21	40.7353	Yes	0.0053				P14	0.1323	0.00806	3	0.1247		P1 vs. P21	44.5722	No	0.0996				P14	0.07469	0.00857	3	0.07449		P1 vs. P21	7.99355	Yes	<0.0001				P14	0.09207	0.012	3	0.09062		P1 vs. P21	11.0099	Yes	<0.0001
	P21	0.07479	0.001745	3	0.07562		P1 vs. P28	57.4074	Yes	0.0002				P21	0.08179	0.01018	3	0.07263		P1 vs. P28	92.1526	Yes	0.0004				P21	0.07685	0.004864	3	0.07821		P1 vs. P28	10.0426	Yes	<0.0001				P21	0.133	0.001748	3	0.1337		P1 vs. P28	10.6126	Yes	<0.0001
	P28	0.1054	0.02826	3	0.07893		P4 vs. P7	9.5587	No	0.9815				P28	0.1691	0.03797	3	0.204		P4 vs. P7	2.92937	No	0.2069				P28	0.09655	0.006161	3	0.1014		P4 vs. P7	1.21534	No	0.7012				P28	0.1282	0.01012	3	0.1284		P4 vs. P7	1.85898	No	0.2083
							P4 vs. P14	83.3472	Yes	0.0002										P4 vs. P14	3.53933	No	0.0575										P4 vs. P14	1.49201	No	0.0546										P4 vs. P14	3.3812	Yes	0.0002
							P4 vs. P21	62.2731	Yes	0.0049										P4 vs. P21	2.18807	No	0.6627										P4 vs. P21	1.53516	Yes	0.0336										P4 vs. P21	4.88432	Yes	<0.0001
	ANOVA summary						P4 vs. P28	87.7602	Yes	0.0002				ANOVA summary						P4 vs. P28	4.52381	Yes	0.0063				ANOVA summary						P4 vs. P28	1.92869	Yes	0.0005				ANOVA summary						P4 vs. P28	4.70804	Yes	<0.0001
	P value	<0.0001					P7 vs. P14	8.71951	Yes	0.0002				P value	0.0004					P7 vs. P14	1.20822	No	0.9663				P value	<0.0001					P7 vs. P14	1.22765	No	0.4673				P value	<0.0001					P7 vs. P14	1.81885	Yes	0.0091
	Significant diff. among means (P < 0.05)?	Yes					P7 vs. P21	6.51481	Yes	0.0096				Significant diff. among means (P < 0.05)?	Yes					P7 vs. P21	0.746941	No	0.9279				Significant diff. among means (P < 0.05)?	Yes					P7 vs. P21	1.26315	No	0.3263				Significant diff. among means (P < 0.05)?	Yes					P7 vs. P21	2.62742	Yes	<0.0001
							P7 vs. P28	9.18118	Yes	0.0003										P7 vs. P28	1.54429	No	0.3756										P7 vs. P28	1.58695	Yes	0.0045										P7 vs. P28	2.5326	Yes	<0.0001
							P14 vs. P21	0.747153	No	0.5676										P14 vs. P21	0.618216	No	0.5418										P14 vs. P21	1.02892	No	0.9996										P14 vs. P21	1.44455	Yes	0.01
							P14 vs. P28	1.05295	No	0.9992										P14 vs. P28	1.27816	No	0.8035										P14 vs. P28	1.29268	No	0.1007										P14 vs. P28	1.39242	Yes	0.0232
							P21 vs. P28	1.40928	No	0.4445										P21 vs. P28	2.06749	No	0.0896										P21 vs. P28	1.25634	No	0.1591										P21 vs. P28	0.96391	No	0.9952
Layer5	Age	Mean	Std. Error of Mean	N	Median		Tukey's multiple comparisons test	Fold change (gr2/gr1)	Significant?	Adjusted P Value			Layer5	Age	Mean	Std. Error of Mean	N	Median		Tukey's multiple comparisons test	Fold change (gr2/gr1)	Significant?	Adjusted P Value			Layer6	Age	Mean	Std. Error of Mean	N	Median		Tukey's multiple comparisons test	Fold change (gr2/gr1)	Significant?	Adjusted P Value			Layer6	Age	Mean	Std. Error of Mean	N	Median		Tukey's multiple comparisons test	Fold change (gr2/gr1)	Significant?	Adjusted P Value
	P1	0.002598	0.001488	3	0.001474		P1 vs. P4	1.1251	No	>0.9999				P1	0.004668	0.002549	4	0.0026		P1 vs. P4	2.17652	No	0.3331				P1	0.01482	0.004227	3	0.01586		P1 vs. P4	3.7942	Yes	0.0147				P1	0.008777	0.000992	3	0.008001		P1 vs. P4	4.79093	No	0.2051
	P4	0.002923	0.000299	3	0.003036		P1 vs. P7	5.71978	No	0.9726				P4	0.01016	0.0001299	3	0.01024		P1 vs. P7	1.86654	No	0.6333				P4	0.05623	0.004857	3	0.05609		P1 vs. P7	3.31444	Yes	0.0481				P4	0.04205	0.00417	3	0.04312		P1 vs. P7	5.83685	No	0.0694
	P7	0.01486	0.001609	4	0.01502		P1 vs. P14	42.3018	Yes	0.0002				P7	0.008713	0.002708	3	0.00659		P1 vs. P14	1.62232	No	0.8633				P7	0.04912	0.01021	3	0.04288		P1 vs. P14	4.98448	Yes	0.0009				P7	0.05123	0.01293	3	0.03978		P1 vs. P14	9.27766	Yes	0.0017
	P14	0.1099	0.006389	4	0.1135		P1 vs. P21	37.2363	Yes	0.0012				P14	0.007573	0.001479	3	0.00879		P1 vs. P21	0.913239	No	>0.9999				P14	0.07387	0.002265	3	0.07166		P1 vs. P21	4.80297	Yes	0.0013				P14	0.08143	0.0115	3	0.08762		P1 vs. P21	10.1367	Yes	0.0007
	P21	0.09674	0.006891	3	0.1021		P1 vs. P28	48.3834	Yes	<0.0001				P21	0.004263	0.0004258	3	0.00392		P1 vs. P28	1.42823	No	0.9675				P21	0.07118	0.00382	3	0.07402		P1 vs. P28	5.84615	Yes	0.0001				P21	0.08897	0.003218	3	0.08749		P1 vs. P28	13.786	Yes	<0.0001
	P28	0.1257	0.03083	3	0.1131		P4 vs. P7	5.08382	No	0.9755				P28	0.006667	0.001463	3	0.00739		P4 vs. P7	0.857579	No	0.9941				P28	0.08664	0.01196	3	0.09438		P4 vs. P7	0.873555	No	0.9782				P28	0.121	0.01458	3	0.114		P4 vs. P7	1.21831	No	0.9805
							P4 vs. P14	37.5984	Yes	0.0002										P4 vs. P14	0.745374	No	0.9297										P4 vs. P14	1.31371	No	0.5342										P4 vs. P14	1.9365	No	0.1009
							P4 vs. P21	33.0961	Yes	0.0012										P4 vs. P21	0.419587	No	0.3291										P4 vs. P21	1.26587	No	0.6858										P4 vs. P21	2.11581	Yes	0.0398
	ANOVA summary						P4 vs. P28	43.0038	Yes	<0.0001				ANOVA summary						P4 vs. P28	0.656201	No	0.7983				ANOVA summary						P4 vs. P28	1.54081	No	0.0908				ANOVA summary						P4 vs. P28	2.87753	Yes	0.0008
	P value	<0.0001					P7 vs. P14	7.39569	Yes	0.0003				P value	0.2662					P7 vs. P14	0.869161	No	0.9981				P value	0.0002					P7 vs. P14	1.50387	No	0.2168				P value	<0.0001					P7 vs. P14	1.5895	No	0.2848
	Significant diff. among means (P < 0.05)?	Yes					P7 vs. P21	6.51009	Yes	0.0023				Significant diff. among means (P < 0.05)?	No					P7 vs. P21	0.489269	No	0.6071				Significant diff. among means (P < 0.05)?	Yes					P7 vs. P21	1.4491	No	0.3153				Significant diff. among means (P < 0.05)?	Yes					P7 vs. P21	1.73668	No	0.1228
							P7 vs. P28	8.45895	Yes	0.0001										P7 vs. P28	0.765178	No	0.9729										P7 vs. P28	1.76384	Yes	0.0282										P7 vs. P28	2.3619	Yes	0.0023
							P14 vs. P21	0.880255	No	0.9638										P14 vs. P21	0.562921	No	0.8308										P14 vs. P21	0.963585	No	0.9998										P14 vs. P21	1.09259	No	0.9919
							P14 vs. P28	1.14377	No	0.9233										P14 vs. P28	0.880364	No	0.9994										P14 vs. P28	1.17287	No	0.8003										P14 vs. P28	1.48594	No	0.0981
							P21 vs. P28	1.29936	No	0.5873										P21 vs. P28	1.56392	No	0.9475										P21 vs. P28	1.2172	No	0.6566										P21 vs. P28	1.36001	No	0.2335
Layer6	Age	Mean	Std. Error of Mean	N	Median		Tukey's multiple comparisons test	Fold change (gr2/gr1)	Significant?	Adjusted P Value			Layer6	Age	Mean	Std. Error of Mean	N	Median		Tukey's multiple comparisons test	Fold change (gr2/gr1)	Significant?	Adjusted P Value
	P1	0.008869	0.002259	3	0.007015		P1 vs. P4	1.56162	No	0.9998				P1	0.006228	0.002287	4	0.00448		P1 vs. P4	1.39965	No	0.9268
	P4	0.01385	0.001458	3	0.01465		P1 vs. P7	1.76232	No	0.9987				P4	0.008717	0.0002314	3	0.00861		P1 vs. P7	1.42951	No	0.904
	P7	0.01563	0.001566	4	0.01489		P1 vs. P14	12.7523	Yes	0.0005				P7	0.008903	0.002484	3	0.00653		P1 vs. P14	1.08333	No	>0.9999
	P14	0.1131	0.009766	4	0.1197		P1 vs. P21	10.7836	Yes	0.0046				P14	0.006747	0.001196	3	0.00573		P1 vs. P21	0.802344	No	0.9965
	P21	0.09564	0.004275	3	0.0975		P1 vs. P28	16.0108	Yes	<0.0001				P21	0.004997	0.001641	3	0.00357		P1 vs. P28	1.38776	No	0.9348
	P28	0.142	0.03221	3	0.1211		P4 vs. P7	1.12852	No	>0.9999				P28	0.008643	0.002212	3	0.00975		P4 vs. P7	1.02134	No	>0.9999
							P4 vs. P14	8.16606	Yes	0.0008										P4 vs. P14	0.774005	No	0.9786
							P4 vs. P21	6.90542	Yes	0.0075										P4 vs. P21	0.573248	No	0.7684
	ANOVA summary						P4 vs. P28	10.2527	Yes	0.0001				ANOVA summary						P4 vs. P28	0.991511	No	>0.9999
	P value	<0.0001					P7 vs. P14	7.23608	Yes	0.0004				P value	0.6438					P7 vs. P14	0.757834	No	0.9685
	Significant diff. among means (P < 0.05)?	Yes					P7 vs. P21	6.119	Yes	0.0052				Significant diff. among means (P < 0.05)?	No					P7 vs. P21	0.561271	No	0.7327
							P7 vs. P28	9.08509	Yes	<0.0001										P7 vs. P28	0.970796	No	>0.9999
							P14 vs. P21	0.845623	No	0.9154										P14 vs. P21	0.740625	No	0.9873
							P14 vs. P28	1.25553	No	0.5941										P14 vs. P28	1.28101	No	0.9818
							P21 vs. P28	1.48473	No	0.2058										P21 vs. P28	1.72964	No	0.7819
VGlut1 thresholded signal/ area (μm2)													VGlut2 thresholded signal/ area (μm2)													GluA1 puncta number/ volume (μm3)													GluA2 puncta number/ volume (μm3)
Comparison between layers within each age													Comparison between layers within each age													Comparison between layers within each age													Comparison between layers within each age
P1	Layer	Mean	Std. Error of Mean	N	Median		Tukey's multiple comparisons test	Fold change (gr2/gr1)	Significant?	Adjusted P Value			P1	Layer	Mean	Std. Error of Mean	N	Median		Tukey's multiple comparisons test	Fold change (gr2/gr1)	Significant?	Adjusted P Value			P1	Layer	Mean	Std. Error of Mean	N	Median	L1 vs average L2-6	Tukey's multiple comparisons test	Fold change (gr2/gr1)	Significant?	Adjusted P Value			P1	Layer	Mean	Std. Error of Mean	N	Median	L1 vs average L2-6	Tukey's multiple comparisons test	Fold change (gr2/gr1)	Significant?	Adjusted P Value
	L1	0.002056	0.001007	3	0.001068		L1 vs. L2	0.988813	No	>0.9999				L1	0.007797	0.005397	4	0.002982		L1 vs. L2	0.203283	No	0.5782				L1	0.0708	0.01141	3	0.06403	6.10626	L1 vs. L2	0.146186	Yes	0.0006				L1	0.07291	0.01152	3	0.06191	7.05194	L1 vs. L2	0.13935	Yes	0.0007
	L2/3	0.002033	0.001264	3	0.001332		L1 vs. L4	0.892996	No	>0.9999				L2/3	0.001585	0.0008229	4	0.00094		L1 vs. L4	0.235347	No	0.6138				L2/3	0.01035	0.003157	3	0.007796		L1 vs. L4-5	0.135791	Yes	0.0006				L2/3	0.01016	0.005959	3	0.005791		L1 vs. L4-5	0.165684	Yes	0.0008
	L4	0.001836	0.001192	3	0.0009654		L1 vs. L5	1.26362	No	0.9989				L4	0.001835	0.001176	4	0.0009		L1 vs. L5	0.598692	No	0.9394				L4-5	0.009614	0.001067	3	0.009975		L1 vs. L6	0.209322	Yes	0.0011				L4-5	0.01208	0.001973	3	0.01047		L1 vs. L6	0.120381	Yes	0.0006
	L5	0.002598	0.001488	3	0.001474		L1 vs. L6	4.31372	No	0.0578				L5	0.004668	0.002549	4	0.0026		L1 vs. L6	0.798769	No	0.9951				L6	0.01482	0.004227	3	0.01586		L2 vs. L4-5	0.928889	No	0.9998				L6	0.008777	0.000992	3	0.008001		L2 vs. L4-5	1.18898	No	0.9966
	L6	0.008869	0.002259	3	0.007015		L2 vs. L4	0.903099	No	>0.9999				L6	0.006228	0.002287	4	0.00448		L2 vs. L4	1.15773	No	>0.9999										L2 vs. L6	1.43188	No	0.9567										L2 vs. L6	0.863878	No	0.9987
							L2 vs. L5	1.27791	No	0.9987										L2 vs. L5	2.94511	No	0.9425										L4-5 vs. L6	1.5415	No	0.9343										L4-5 vs. L6	0.726573	No	0.9836
	ANOVA summary						L2 vs. L6	4.36252	No	0.0568				ANOVA summary						L2 vs. L6	3.92934	No	0.7936				ANOVA summary													ANOVA summary
	P value	0.0335					L4 vs. L5	1.41503	No	0.9959				P value	0.5112					L4 vs. L5	2.54387	No	0.957				P value	0.0003												P value	0.0003
	Significant diff. among means (P < 0.05)?	Yes					L4 vs. L6	4.83061	Yes	0.0493				Significant diff. among means (P < 0.05)?	No					L4 vs. L6	3.39401	No	0.8235				Significant diff. among means (P < 0.05)?	Yes												Significant diff. among means (P < 0.05)?	Yes
							L5 vs. L6	3.41378	No	0.0856										L5 vs. L6	1.33419	No	0.9953
P4	Layer	Mean	Std. Error of Mean	N	Median		Tukey's multiple comparisons test	Fold change (gr2/gr1)	Significant?	Adjusted P Value			P4	Layer	Mean	Std. Error of Mean	N	Median		Tukey's multiple comparisons test	Fold change (gr2/gr1)	Significant?	Adjusted P Value			P4	Layer	Mean	Std. Error of Mean	N	Median		Tukey's multiple comparisons test	Fold change (gr2/gr1)	Significant?	Adjusted P Value			P4	Layer	Mean	Std. Error of Mean	N	Median		Tukey's multiple comparisons test	Fold change (gr2/gr1)	Significant?	Adjusted P Value
	L1	0.004539	0.0008197	3	0.003988		L1 vs. L2	0.374972	No	0.1618				L1	0.05009	0.01217	3	0.03868		L1 vs. L2	0.0914953	Yes	0.0041				L1	0.09282	0.01149	3	0.1002	1.99699	L1 vs. L2	0.357143	Yes	0.0014				L1	0.09326	0.007841	3	0.08948	3.38225	L1 vs. L2	0.144113	Yes	<0.0001
	L2/3	0.001702	0.0005195	3	0.001941		L1 vs. L4	0.264596	No	0.0828				L2/3	0.004583	0.0005238	3	0.0041		L1 vs. L4	0.746257	No	0.6523				L2/3	0.03315	0.003875	3	0.03517		L1 vs. L4-5	0.539323	Yes	0.0111				L2/3	0.01344	0.002946	3	0.01271		L1 vs. L4-5	0.291979	Yes	<0.0001
	L4	0.001201	0.00011	3	0.001143		L1 vs. L5	0.643974	No	0.6213				L4	0.03738	0.00796	3	0.03804		L1 vs. L5	0.202835	Yes	0.01				L4-5	0.05006	0.005163	3	0.05471		L1 vs. L6	0.605796	Yes	0.0256				L4-5	0.02723	0.003107	3	0.02945		L1 vs. L6	0.45089	Yes	0.0004
	L5	0.002923	0.000299	3	0.003036		L1 vs. L6	3.05133	Yes	<0.0001				L5	0.01016	0.0001299	3	0.01024		L1 vs. L6	0.174027	Yes	0.0079				L6	0.05623	0.004857	3	0.05609		L2 vs. L4-5	1.51011	No	0.3816				L6	0.04205	0.00417	3	0.04312		L2 vs. L4-5	2.02604	No	0.2715
	L6	0.01385	0.001458	3	0.01465		L2 vs. L4	0.70564	No	0.9906				L6	0.008717	0.0002314	3	0.00861		L2 vs. L4	8.15623	Yes	0.0328										L2 vs. L6	1.69623	No	0.1713										L2 vs. L6	3.12872	Yes	0.0145
							L2 vs. L5	1.71739	No	0.8106										L2 vs. L5	2.21689	No	0.9709										L4-5 vs. L6	1.12325	No	0.9225										L4-5 vs. L6	1.54425	No	0.2242
	ANOVA summary						L2 vs. L6	8.13749	Yes	<0.0001				ANOVA summary						L2 vs. L6	1.90203	No	0.9903				ANOVA summary													ANOVA summary
	P value	<0.0001					L4 vs. L5	2.43381	No	0.5681				P value	0.0018					L4 vs. L5	0.271803	No	0.0838				P value	0.002												P value	<0.0001
	Significant diff. among means (P < 0.05)?	Yes					L4 vs. L6	11.5321	Yes	<0.0001				Significant diff. among means (P < 0.05)?	Yes					L4 vs. L6	0.2332	No	0.0658				Significant diff. among means (P < 0.05)?	Yes												Significant diff. among means (P < 0.05)?	Yes
							L5 vs. L6	4.73828	Yes	<0.0001										L5 vs. L6	0.857972	No	0.9998
P7	Layer	Mean	Std. Error of Mean	N	Median		Tukey's multiple comparisons test	Fold change (gr2/gr1)	Significant?	Adjusted P Value			P7	Layer	Mean	Std. Error of Mean	N	Median		Tukey's multiple comparisons test	Fold change (gr2/gr1)	Significant?	Adjusted P Value			P7	Layer	Mean	Std. Error of Mean	N	Median		Tukey's multiple comparisons test	Fold change (gr2/gr1)	Significant?	Adjusted P Value			P7	Layer	Mean	Std. Error of Mean	N	Median		Tukey's multiple comparisons test	Fold change (gr2/gr1)	Significant?	Adjusted P Value
	L1	0.02328	0.003549	4	0.0232		L1 vs. L2	0.75043	No	0.4068				L1	0.09507	0.02344	3	0.1125		L1 vs. L2	0.0879352	Yes	0.0468				L1	0.1193	0.003084	3	0.1214	2.14916	L1 vs. L2	0.474183	Yes	0.0003				L1	0.06907	0.02054	3	0.06246	1.52484	L1 vs. L2	0.492833	No	0.2627
	L2/3	0.01747	0.002319	4	0.01666		L1 vs. L4	0.493127	Yes	0.0166				L2/3	0.00836	0.002258	3	0.01041		L1 vs. L4	1.15178	No	0.979				L2/3	0.05657	0.004617	3	0.06012		L1 vs. L4-5	0.509975	Yes	0.0005				L2/3	0.03404	0.003915	3	0.03022		L1 vs. L4-5	0.73288	No	0.7238
	L4	0.01148	0.0017	4	0.01221		L1 vs. L5	0.638316	No	0.1174				L4	0.1095	0.03351	3	0.1391		L1 vs. L5	0.0916483	Yes	0.0478				L4-5	0.06084	0.001898	3	0.05999		L1 vs. L6	0.411735	Yes	0.0001				L4-5	0.05062	0.002559	3	0.04886		L1 vs. L6	0.741711	No	0.7428
	L5	0.01486	0.001609	4	0.01502		L1 vs. L6	0.671392	No	0.1754				L5	0.008713	0.002708	3	0.00659		L1 vs. L6	0.0936468	Yes	0.0483				L6	0.04912	0.01021	3	0.04288		L2 vs. L4-5	1.07548	No	0.9537				L6	0.05123	0.01293	3	0.03978		L2 vs. L4-5	1.48707	No	0.7809
	L6	0.01563	0.001566	4	0.01489		L2 vs. L4	0.657127	No	0.3764				L6	0.008903	0.002484	3	0.00653		L2 vs. L4	13.0981	Yes	0.0199										L2 vs. L6	0.868305	No	0.8081										L2 vs. L6	1.50499	No	0.7627
							L2 vs. L5	0.850601	No	0.9233										L2 vs. L5	1.04222	No	>0.9999										L4-5 vs. L6	0.807364	No	0.5291										L4-5 vs. L6	1.01205	No	>0.9999
	ANOVA summary						L2 vs. L6	0.894677	No	0.9772				ANOVA summary						L2 vs. L6	1.06495	No	>0.9999				ANOVA summary													ANOVA summary
	P value	0.0288					L4 vs. L5	1.29443	No	0.8269				P value	0.0039					L4 vs. L5	0.0795708	Yes	0.0203				P value	0.0001												P value	0.3281
	Significant diff. among means (P < 0.05)?	Yes					L4 vs. L6	1.3615	No	0.7001				Significant diff. among means (P < 0.05)?	Yes					L4 vs. L6	0.0813059	Yes	0.0205				Significant diff. among means (P < 0.05)?	Yes												Significant diff. among means (P < 0.05)?	No
							L5 vs. L6	1.05182	No	0.9992										L5 vs. L6	1.02181	No	>0.9999
P14	Layer	Mean	Std. Error of Mean	N	Median		Tukey's multiple comparisons test	Fold change (gr2/gr1)	Significant?	Adjusted P Value			P14	Layer	Mean	Std. Error of Mean	N	Median		Tukey's multiple comparisons test	Fold change (gr2/gr1)	Significant?	Adjusted P Value			P14	Layer	Mean	Std. Error of Mean	N	Median		Tukey's multiple comparisons test	Fold change (gr2/gr1)	Significant?	Adjusted P Value			P14	Layer	Mean	Std. Error of Mean	N	Median		Tukey's multiple comparisons test	Fold change (gr2/gr1)	Significant?	Adjusted P Value
	L1	0.09115	0.0137	4	0.09254		L1 vs. L2	1.03258	No	0.9995				L1	0.1564	0.01732	3	0.1652		L1 vs. L2	0.0547762	Yes	<0.0001				L1	0.1155	0.01173	3	0.1038	1.46772	L1 vs. L2	0.757749	No	0.105				L1	0.184	0.02193	3	0.1745	2.12234	L1 vs. L2	0.470598	Yes	0.0047
	L2/3	0.09412	0.009612	4	0.09369		L1 vs. L4	1.09819	No	0.9628				L2/3	0.008567	0.001165	3	0.00765		L1 vs. L4	0.845908	No	0.3415				L2/3	0.08752	0.001517	3	0.08829		L1 vs. L4-5	0.646667	Yes	0.019				L2/3	0.08659	0.002344	3	0.08624		L1 vs. L4-5	0.50038	Yes	0.0066
	L4	0.1001	0.007349	4	0.1038		L1 vs. L5	1.2057	No	0.6583				L4	0.1323	0.00806	3	0.1247		L1 vs. L5	0.0484207	Yes	<0.0001				L4-5	0.07469	0.00857	3	0.07449		L1 vs. L6	0.639567	Yes	0.0171				L4-5	0.09207	0.012	3	0.09062		L1 vs. L6	0.442554	Yes	0.0034
	L5	0.1099	0.006389	4	0.1135		L1 vs. L6	1.24081	No	0.5189				L5	0.007573	0.001479	3	0.00879		L1 vs. L6	0.0431394	Yes	<0.0001				L6	0.07387	0.002265	3	0.07166		L2 vs. L4-5	0.853405	No	0.6285				L6	0.08143	0.0115	3	0.08762		L2 vs. L4-5	1.06329	No	0.9917
	L6	0.1131	0.009766	4	0.1197		L2 vs. L4	1.06354	No	0.9914				L6	0.006747	0.001196	3	0.00573		L2 vs. L4	15.443	Yes	<0.0001										L2 vs. L6	0.844036	No	0.5844										L2 vs. L6	0.940409	No	0.993
							L2 vs. L5	1.16766	No	0.7799										L2 vs. L5	0.883973	No	>0.9999										L4-5 vs. L6	0.989021	No	0.9998										L4-5 vs. L6	0.884436	No	0.9454
	ANOVA summary						L2 vs. L6	1.20166	No	0.6462				ANOVA summary						L2 vs. L6	0.787557	No	0.9999				ANOVA summary													ANOVA summary
	P value	0.4491					L4 vs. L5	1.0979	No	0.9516				P value	<0.0001					L4 vs. L5	0.0572411	Yes	<0.0001				P value	0.013												P value	0.0022
	Significant diff. among means (P < 0.05)?	No					L4 vs. L6	1.12987	No	0.8749				Significant diff. among means (P < 0.05)?	Yes					L4 vs. L6	0.0509977	Yes	<0.0001				Significant diff. among means (P < 0.05)?	Yes												Significant diff. among means (P < 0.05)?	Yes
							L5 vs. L6	1.02912	No	0.9992										L5 vs. L6	0.890928	No	>0.9999
P21	Layer	Mean	Std. Error of Mean	N	Median		Tukey's multiple comparisons test	Fold change (gr2/gr1)	Significant?	Adjusted P Value			P21	Layer	Mean	Std. Error of Mean	N	Median		Tukey's multiple comparisons test	Fold change (gr2/gr1)	Significant?	Adjusted P Value			P21	Layer	Mean	Std. Error of Mean	N	Median		Tukey's multiple comparisons test	Fold change (gr2/gr1)	Significant?	Adjusted P Value			P21	Layer	Mean	Std. Error of Mean	N	Median		Tukey's multiple comparisons test	Fold change (gr2/gr1)	Significant?	Adjusted P Value
	L1	0.07327	0.01175	3	0.07405		L1 vs. L2	1.10823	No	0.9261				L1	0.08864	0.01094	3	0.08425		L1 vs. L2	0.0278994	Yes	<0.0001				L1	0.1134	0.006085	3	0.1079	1.59531	L1 vs. L2	0.575132	Yes	0.0006				L1	0.1422	0.002055	3	0.1432	1.25666	L1 vs. L2	0.826301	No	0.1339
	L2/3	0.0812	0.006442	3	0.07557		L1 vs. L4	1.02075	No	0.9999				L2/3	0.002473	0.000489	3	0.00203		L1 vs. L4	0.922721	No	0.9473				L2/3	0.06522	0.004923	3	0.06604		L1 vs. L4-5	0.67769	Yes	0.0037				L2/3	0.1175	0.01334	3	0.1278		L1 vs. L4-5	0.935302	No	0.7873
	L4	0.07479	0.001745	3	0.07562		L1 vs. L5	1.32032	No	0.2051				L4	0.08179	0.01018	3	0.07263		L1 vs. L5	0.0480934	Yes	<0.0001				L4-5	0.07685	0.004864	3	0.07821		L1 vs. L6	0.62769	Yes	0.0015				L4-5	0.133	0.001748	3	0.1337		L1 vs. L6	0.625668	Yes	0.0029
	L5	0.09674	0.006891	3	0.1021		L1 vs. L6	1.30531	No	0.2396				L5	0.004263	0.0004258	3	0.00392		L1 vs. L6	0.0563741	Yes	<0.0001				L6	0.07118	0.00382	3	0.07402		L2 vs. L4-5	1.17832	No	0.4067				L6	0.08897	0.003218	3	0.08749		L2 vs. L4-5	1.13191	No	0.4463
	L6	0.09564	0.004275	3	0.0975		L2 vs. L4	0.921059	No	0.9641				L6	0.004997	0.001641	3	0.00357		L2 vs. L4	33.0732	Yes	<0.0001										L2 vs. L6	1.09138	No	0.832										L2 vs. L6	0.757191	No	0.0785
							L2 vs. L5	1.19138	No	0.5514										L2 vs. L5	1.72382	No	0.9997										L4-5 vs. L6	0.92622	No	0.851										L4-5 vs. L6	0.668947	Yes	0.0092
	ANOVA summary						L2 vs. L6	1.17783	No	0.6137				ANOVA summary						L2 vs. L6	2.02062	No	0.9987				ANOVA summary													ANOVA summary
	P value	0.1056					L4 vs. L5	1.29349	No	0.2537				P value	<0.0001					L4 vs. L5	0.0521213	Yes	<0.0001				P value	0.0005												P value	0.0032
	Significant diff. among means (P < 0.05)?	No					L4 vs. L6	1.27878	No	0.2945				Significant diff. among means (P < 0.05)?	Yes					L4 vs. L6	0.0610955	Yes	<0.0001				Significant diff. among means (P < 0.05)?	Yes												Significant diff. among means (P < 0.05)?	Yes
							L5 vs. L6	0.988629	No	>0.9999										L5 vs. L6	1.17218	No	>0.9999
P28	Layer	Mean	Std. Error of Mean	N	Median		Tukey's multiple comparisons test	Fold change (gr2/gr1)	Significant?	Adjusted P Value			P28	Layer	Mean	Std. Error of Mean	N	Median		Tukey's multiple comparisons test	Fold change (gr2/gr1)	Significant?	Adjusted P Value			P28	Layer	Mean	Std. Error of Mean	N	Median		Tukey's multiple comparisons test	Fold change (gr2/gr1)	Significant?	Adjusted P Value			P28	Layer	Mean	Std. Error of Mean	N	Median		Tukey's multiple comparisons test	Fold change (gr2/gr1)	Significant?	Adjusted P Value
	L1	0.1229	0.03447	3	0.09472		L1 vs. L2	0.929211	No	0.9996				L1	0.198	0.03883	3	0.1978		L1 vs. L2	0.0306061	Yes	0.0017				L1	0.142	0.02082	3	0.1555	1.57265	L1 vs. L2	0.617535	No	0.0762				L1	0.1529	0.007037	3	0.1493	1.22385	L1 vs. L2	0.821452	No	0.2726
	L2/3	0.1142	0.02671	3	0.09632		L1 vs. L4	0.857608	No	0.9935				L2/3	0.00606	0.00172	3	0.00754		L1 vs. L4	0.85404	No	0.9125				L2/3	0.08769	0.009156	3	0.09634		L1 vs. L4-5	0.67993	No	0.1482				L2/3	0.1256	0.004169	3	0.129		L1 vs. L4-5	0.838457	No	0.3462
	L4	0.1054	0.02826	3	0.07893		L1 vs. L5	1.02278	No	>0.9999				L4	0.1691	0.03797	3	0.204		L1 vs. L5	0.0336717	Yes	0.0017				L4-5	0.09655	0.006161	3	0.1014		L1 vs. L6	0.610141	No	0.0704				L4-5	0.1282	0.01012	3	0.1284		L1 vs. L6	0.791367	No	0.1762
	L5	0.1257	0.03083	3	0.1131		L1 vs. L6	1.15541	No	0.9909				L5	0.006667	0.001463	3	0.00739		L1 vs. L6	0.0436515	Yes	0.0019				L6	0.08664	0.01196	3	0.09438		L2 vs. L4-5	1.10104	No	0.9627				L6	0.121	0.01458	3	0.114		L2 vs. L4-5	1.0207	No	0.9973
	L6	0.142	0.03221	3	0.1211		L2 vs. L4	0.922942	No	0.9995				L6	0.008643	0.002212	3	0.00975		L2 vs. L4	27.9043	Yes	0.0055										L2 vs. L6	0.988026	No	>0.9999										L2 vs. L6	0.963376	No	0.9869
							L2 vs. L5	1.1007	No	0.9987										L2 vs. L5	1.10017	No	>0.9999										L4-5 vs. L6	0.897359	No	0.9493										L4-5 vs. L6	0.943838	No	0.9521
	ANOVA summary						L2 vs. L6	1.24343	No	0.9644				ANOVA summary						L2 vs. L6	1.42624	No	>0.9999				ANOVA summary													ANOVA summary
	P value	0.9327					L4 vs. L5	1.1926	No	0.9887				P value	0.0002					L4 vs. L5	0.0394264	Yes	0.0057				P value	0.0539												P value	0.174
	Significant diff. among means (P < 0.05)?	No					L4 vs. L6	1.34725	No	0.9103				Significant diff. among means (P < 0.05)?	Yes					L4 vs. L6	0.0511118	Yes	0.0062				Significant diff. among means (P < 0.05)?	No												Significant diff. among means (P < 0.05)?	No
							L5 vs. L6	1.12967	No	0.995										L5 vs. L6	1.29639	No	>0.9999
