# Supplementary material for: Activity-dependent modulation of synapse-regulating genes in astrocytes
Source: eLife. 2021 Sep 8;10:e70514. doi: 10.7554/eLife.70514 (PMC8497060; doi:10.7554/eLife.70514)
Supplement: Figure 4—figure supplement 1—source data 1. — (A) Full uncropped western blot representative image showing Gpc4 secretion from astrocytes is decreased in the presence of neurons. Red arrow indicates Gpc4 signal at ~36 kDa. Second red arrow indicates the three relevant lanes as labeled shown in the cropped image in Figure 4—figure supplement 1A. (B) Full uncropped western blot representative images showing Gpc4 secretion from astrocytes is decreased in the presence of neurotransmitters glutamate, adenosine, and ATP as indicated. Left panel shows glypican 4, right panel indicates APOJ used as loading control. Red arrow indicates GPC4 signal at ~36 kDa; APOJ signal at ~40 kDa. [file elife-70514-fig4-figsupp1-data1.xlsx]

## Sheet: Figure 4-Source Data 1A
Related to	Figure 4, Figure 4-figure supplement 2	Differences in mRNA expression between wt and ko in VGlut2cKO model as indicated - full statistical analysis. Averages, and analysis calculated for N=5, i.e. per mouse
VGlut2 cKO P14		Figure 4 D-I, Figure 4-figure supplement 2E							VGlut2 cKO P7		Figure 4-figure supplement 2G-J
average per mouse comparison									average per mouse comparison
Comparison between genotypes within each layer									Comparison between genotypes within each layer
Slc1a3 (Chrdl1 group)									Slc1a3 (Chrdl1 group)
Layer1	Genotype	Mean	Std. Error of Mean	N	Median	paired t-test	Significant?		Layer1	Genotype	Mean	Std. Error of Mean	N	Median	paired t-test	Significant?
	VGlut2 WT	17.4946	0.773992	5	18.136					VGlut2 WT	35.0337	1.94887	5	37.4502
	VGlut2 cKO	14.4917	1.55727	5	14.3092					VGlut2 cKO	37.3946	3.22565	5	36.4699
	cKO/ WT FC	0.823	0.065	5	0.889	0.0557889	No			cKO/ WT FC	1.07088	0.0775779	5	1.15573	0.466825	No
Layer2/3	Genotype	Mean	Std. Error of Mean	N	Median	paired t-test			Layer2/3	Genotype	Mean	Std. Error of Mean	N	Median	paired t-test
	VGlut2 WT	19.6923	2.40796	5	22.4801					VGlut2 WT	38.7689	2.09049	5	38.3952
	VGlut2 cKO	18.0873	1.08318	5	18.2025					VGlut2 cKO	38.5401	3.96646	5	40.779
	cKO/ WT FC	0.968	0.1108	5	0.9031	0.478616	No			cKO/ WT FC	0.985229	0.0706502	5	1.04995	0.928263	No
Layer4	Genotype	Mean	Std. Error of Mean	N	Median	paired t-test			Layer4	Genotype	Mean	Std. Error of Mean	N	Median	paired t-test
	VGlut2 WT	17.8072	2.10436	5	16.2696					VGlut2 WT	39.1359	2.8132	5	37.288
	VGlut2 cKO	17.2283	1.75201	5	18.1411					VGlut2 cKO	44.5044	4.70364	5	46.2777
	cKO/ WT FC	1.01	0.1336	5	1.109	0.850153	No			cKO/ WT FC	1.13742	0.0971546	5	1.10583	0.201498	No
Layer5	Genotype	Mean	Std. Error of Mean	N	Median	paired t-test			Layer5	Genotype	Mean	Std. Error of Mean	N	Median	paired t-test
	VGlut2 WT	16.1842	2.22296	5	15.6624					VGlut2 WT	38.9452	2.66736	5	36.6552
	VGlut2 cKO	16.7661	1.42796	5	18.1075					VGlut2 cKO	41.1273	2.8175	5	42.4863
	cKO/ WT FC	1.067	0.079	5	1.156	0.725403	No			cKO/ WT FC	1.0753	0.107139	5	0.920597	0.600209	No
Layer6	Genotype	Mean	Std. Error of Mean	N	Median	paired t-test			Layer6	Genotype	Mean	Std. Error of Mean	N	Median	paired t-test
	VGlut2 WT	13.5813	1.09259	5	12.4491					VGlut2 WT	31.7445	2.14966	5	31.9335
	VGlut2 cKO	14.7706	0.92721	5	14.4171					VGlut2 cKO	34.0597	3.06055	5	36.3543
	cKO/ WT FC	1.111	0.1054	5	0.977	0.408346	No			cKO/ WT FC	1.08147	0.102952	5	1.1156	0.501793	No
Chrdl1									Chrdl1
Layer1	Genotype	Mean	Std. Error of Mean	N	Median	paired t-test	Significant?		Layer1	Genotype	Mean	Std. Error of Mean	N	Median	paired t-test	Significant?
	VGlut2 WT	5.97751	0.405082	5	5.60647					VGlut2 WT	17.1074	0.837957	5	17.9048
	VGlut2 cKO	4.62112	0.51075	5	4.29553					VGlut2 cKO	19.2237	2.30317	5	20.8117
	cKO/ WT FC	0.7671	0.0375	5	0.766	0.00283108	Yes			cKO/ WT FC	1.11181	0.0921608	5	1.13096	0.271737	No
Layer2/3	Genotype	Mean	Std. Error of Mean	N	Median	paired t-test			Layer2/3	Genotype	Mean	Std. Error of Mean	N	Median	paired t-test
	VGlut2 WT	9.62958	1.82046	5	7.18459					VGlut2 WT	16.1142	1.65087	5	15.039
	VGlut2 cKO	6.05453	0.617514	5	6.54412					VGlut2 cKO	17.0682	1.87415	5	16.0866
	cKO/ WT FC	0.6904	0.1158	5	0.6426	0.106032	No			cKO/ WT FC	1.06665	0.0673859	5	1.12467	0.414713	No
Layer4	Genotype	Mean	Std. Error of Mean	N	Median	paired t-test			Layer4	Genotype	Mean	Std. Error of Mean	N	Median	paired t-test
	VGlut2 WT	6.16128	1.17336	5	4.92447					VGlut2 WT	18.7465	1.50816	5	17.6317
	VGlut2 cKO	3.22585	0.371271	5	3.3476					VGlut2 cKO	20.1216	3.75926	5	16.5778
	cKO/ WT FC	0.5676	0.0896	5	0.4629	0.0391276	Yes			cKO/ WT FC	1.05998	0.136916	5	1.06458	0.656753	No
Layer5	Genotype	Mean	Std. Error of Mean	N	Median	paired t-test			Layer5	Genotype	Mean	Std. Error of Mean	N	Median	paired t-test
	VGlut2 WT	3.14411	0.43439	5	2.77608					VGlut2 WT	11.6503	0.833811	5	11.821
	VGlut2 cKO	2.50678	0.247459	5	2.24344					VGlut2 cKO	11.0679	2.07241	5	10.5276
	cKO/ WT FC	0.8369	0.1039	5	0.7404	0.17008	No			cKO/ WT FC	0.93345	0.129478	5	0.984842	0.720193	No
Layer6	Genotype	Mean	Std. Error of Mean	N	Median	paired t-test			Layer6	Genotype	Mean	Std. Error of Mean	N	Median	paired t-test
	VGlut2 WT	1.47583	0.185899	5	1.5451					VGlut2 WT	8.43175	3.07365	5	5.46985
	VGlut2 cKO	1.3459	0.0932048	5	1.36153					VGlut2 cKO	6.87302	2.24377	5	5.53812
	cKO/ WT FC	0.9825	0.1591	5	0.9414	0.568199	No			cKO/ WT FC	0.841336	0.0781565	5	0.778427	0.177636	No
Gpc4									Gpc4
Layer1	Genotype	Mean	Std. Error of Mean	N	Median	paired t-test	Significant?		Layer1	Genotype	Mean	Std. Error of Mean	N	Median	paired t-test	Significant?
	VGlut2 WT	1.27177	0.128908	5	1.33191					VGlut2 WT	6.42142	0.60285	5	6.59343
	VGlut2 cKO	2.3273	0.147642	5	2.30754					VGlut2 cKO	7.26741	0.895345	5	7.83225
	cKO/ WT FC	1.913	0.2453	5	1.757	0.00206502	Yes			cKO/ WT FC	1.1646	0.174074	5	1.15985	0.383585	No
Layer2/3	Genotype	Mean	Std. Error of Mean	N	Median	paired t-test			Layer2/3	Genotype	Mean	Std. Error of Mean	N	Median	paired t-test
	VGlut2 WT	2.89424	0.368024	5	2.923					VGlut2 WT	5.40648	0.7823	5	5.49099
	VGlut2 cKO	3.5463	0.428717	5	3.6677					VGlut2 cKO	6.02758	0.902779	5	6.90538
	cKO/ WT FC	1.276	0.1732	5	1.293	0.178763	No			cKO/ WT FC	1.10718	0.0636088	5	1.12691	0.129223	No
Layer4	Genotype	Mean	Std. Error of Mean	N	Median	paired t-test			Layer4	Genotype	Mean	Std. Error of Mean	N	Median	paired t-test
	VGlut2 WT	2.47792	0.260372	5	2.78267					VGlut2 WT	6.56213	1.08014	5	5.84012
	VGlut2 cKO	2.89585	0.402359	5	2.6988					VGlut2 cKO	6.00628	0.929525	5	6.36073
	cKO/ WT FC	1.183	0.1197	5	1.062	0.228267	No			cKO/ WT FC	0.935761	0.091939	5	0.873082	0.438466	No
Layer5	Genotype	Mean	Std. Error of Mean	N	Median	paired t-test			Layer5	Genotype	Mean	Std. Error of Mean	N	Median	paired t-test
	VGlut2 WT	3.26941	0.319266	5	3.60465					VGlut2 WT	7.51599	1.04601	5	7.31949
	VGlut2 cKO	3.50538	0.0884728	5	3.44386					VGlut2 cKO	7.23998	1.18889	5	6.49698
	cKO/ WT FC	1.124	0.1356	5	0.9701	0.520321	No			cKO/ WT FC	0.97831	0.112661	5	0.929366	0.752859	No
Layer6	Genotype	Mean	Std. Error of Mean	N	Median	paired t-test			Layer6	Genotype	Mean	Std. Error of Mean	N	Median	paired t-test
	VGlut2 WT	2.12484	0.190408	5	2.11055					VGlut2 WT	5.77644	0.572463	5	5.79782
	VGlut2 cKO	2.00472	0.16009	5	1.77493					VGlut2 cKO	6.47701	0.730198	5	6.5249
	cKO/ WT FC	0.96	0.0746	5	0.9605	0.408989	No			cKO/ WT FC	1.11776	0.032056	5	1.1254	0.0461594	Yes
Gpc6									Gpc6
Layer1	Genotype	Mean	Std. Error of Mean	N	Median	paired t-test	Significant?		Layer1	Genotype	Mean	Std. Error of Mean	N	Median	paired t-test	Significant?
	VGlut2 WT	1.90887	0.155944	5	1.84977					VGlut2 WT	8.41837	0.79398	5	9.19477
	VGlut2 cKO	1.70863	0.202679	5	1.68616					VGlut2 cKO	9.53429	0.84758	5	9.57147
	cKO/ WT FC	0.9084	0.1108	5	0.913	0.432626	No			cKO/ WT FC	1.1523	0.0962098	5	1.09858	0.215104	No
Layer2/3	Genotype	Mean	Std. Error of Mean	N	Median	paired t-test			Layer2/3	Genotype	Mean	Std. Error of Mean	N	Median	paired t-test
	VGlut2 WT	2.40823	0.300723	5	2.37079					VGlut2 WT	6.04595	0.442369	5	6.21344
	VGlut2 cKO	2.35898	0.220472	5	2.40745					VGlut2 cKO	6.34396	1.07309	5	5.56206
	cKO/ WT FC	1.02	0.1132	5	1.05	0.875127	No			cKO/ WT FC	1.03899	0.132096	5	0.993832	0.753947	No
Layer4	Genotype	Mean	Std. Error of Mean	N	Median	paired t-test			Layer4	Genotype	Mean	Std. Error of Mean	N	Median	paired t-test
	VGlut2 WT	2.73078	0.36271	5	2.39654					VGlut2 WT	5.19935	0.628746	5	5.66046
	VGlut2 cKO	1.52624	0.105668	5	1.43289					VGlut2 cKO	5.85112	0.916939	5	6.74092
	cKO/ WT FC	0.6083	0.1128	5	0.5753	0.0423345	Yes			cKO/ WT FC	1.10503	0.0570287	5	1.16938	0.121408	No
Layer5	Genotype	Mean	Std. Error of Mean	N	Median	paired t-test			Layer5	Genotype	Mean	Std. Error of Mean	N	Median	paired t-test
	VGlut2 WT	2.01713	0.190859	5	1.92411					VGlut2 WT	5.19846	0.737106	5	4.88721
	VGlut2 cKO	1.61314	0.0675665	5	1.57915					VGlut2 cKO	5.74579	0.597214	5	5.43396
	cKO/ WT FC	0.8195	0.059	5	0.8628	0.0603674	No			cKO/ WT FC	1.15692	0.117425	5	1.21474	0.419307	No
Layer6	Genotype	Mean	Std. Error of Mean	N	Median	paired t-test			Layer6	Genotype	Mean	Std. Error of Mean	N	Median	paired t-test
	VGlut2 WT	1.45045	0.12321	5	1.42319					VGlut2 WT	4.04641	0.413691	5	3.77286
	VGlut2 cKO	1.04028	0.0953059	5	1.0389					VGlut2 cKO	4.55991	0.596251	5	4.80002
	cKO/ WT FC	0.7253	0.058	5	0.7711	0.0268989	Yes			cKO/ WT FC	1.13592	0.134569	5	1.10392	0.397023	No

## Sheet: Figure 4-Source Data 1B
Related to	Figure 4, Figure 4-figure supplement 2	Differences in mRNA expression between wt and ko in VGlut2cKO model as indicated - full statistical analysis. Averages, and analysis calculated for N=~200-400, i.e. total number of astrocytes per group (across the 5 mice)
VGlut2 cKO P14		Figure 4 D-I, Figure 4-figure supplement 2E							VGlut2 cKO P7		Figure 4-figure supplement 2G-J
single cell comparison									single cell comparison
Comparison between genotypes within each layer									Comparison between genotypes within each layer
Slc1a3 (Chrdl1 group)									Slc1a3 (Chrdl1 group)
Layer1	Genotype	Mean	Std. Error of Mean	n	Median	Mann-Whitney test	Significant?		Layer1	Genotype	Mean	Std. Error of Mean	n	Median	Mann-Whitney test	Significant?
	VGlut2 WT	17.06	0.6997	366	13.73					VGlut2 WT	33.44	1.31	208	29.95
	VGlut2 cKO	13.9	0.5653	414	10.61					VGlut2 cKO	34.1	1.792	171	28.71
	cKO/ WT FC	0.814771				0.0002	Yes			cKO/ WT FC	1.01974				0.6158	No
Layer2/3	Genotype	Mean	Std. Error of Mean	n	Median	Mann-Whitney test			Layer2/3	Genotype	Mean	Std. Error of Mean	n	Median	Mann-Whitney test
	VGlut2 WT	20.53	1.018	319	14.87					VGlut2 WT	37.96	1.455	189	34.84
	VGlut2 cKO	18.04	0.841	287	14.25					VGlut2 cKO	38.48	1.706	190	33.54
	cKO/ WT FC	0.878714				0.2948	No			cKO/ WT FC	1.0137				0.6899	No
Layer4	Genotype	Mean	Std. Error of Mean	n	Median	Mann-Whitney test			Layer4	Genotype	Mean	Std. Error of Mean	n	Median	Mann-Whitney test
	VGlut2 WT	16.56	0.8085	300	12.22					VGlut2 WT	38.47	1.628	180	36.3
	VGlut2 cKO	17.4	0.9022	286	12.58					VGlut2 cKO	43.12	2.117	153	36
	cKO/ WT FC	1.05072				0.5971	No			cKO/ WT FC	1.12087			51	0.2627	No
Layer5	Genotype	Mean	Std. Error of Mean	n	Median	Mann-Whitney test			Layer5	Genotype	Mean	Std. Error of Mean	n	Median	Mann-Whitney test
	VGlut2 WT	16.98	0.7329	498	11.8					VGlut2 WT	39.41	1.179	328	35.62
	VGlut2 cKO	16.89	0.6422	534	12.9					VGlut2 cKO	42.78	1.135	381	39.52
	cKO/ WT FC	0.9947				0.5943	No			cKO/ WT FC	1.08551				0.0323	Yes
Layer6	Genotype	Mean	Std. Error of Mean	n	Median	Mann-Whitney test			Layer6	Genotype	Mean	Std. Error of Mean	n	Median	Mann-Whitney test
	VGlut2 WT	13.63	0.5381	458	10.19					VGlut2 WT	31.84	0.8392	411	28.91
	VGlut2 cKO	15.19	0.6173	472	11.28					VGlut2 cKO	35.2	1.01	387	32.55
	cKO/ WT FC	1.11445				0.1138	No			cKO/ WT FC	1.10553				0.0314	Yes
Chrdl1									Chrdl1
Layer1	Genotype	Mean	Std. Error of Mean	n	Median	Mann-Whitney test	Significant?		Layer1	Genotype	Mean	Std. Error of Mean	n	Median	Mann-Whitney test	Significant?
	VGlut2 WT	5.853	0.2556	366	4.68					VGlut2 WT	17.44	0.8025	208	14.46
	VGlut2 cKO	4.652	0.2037	414	3.692					VGlut2 cKO	17.59	1.105	171	14.77
	cKO/ WT FC	0.794806				0.0005	Yes			cKO/ WT FC	1.0086				0.4907	No
Layer2/3	Genotype	Mean	Std. Error of Mean	n	Median	Mann-Whitney test			Layer2/3	Genotype	Mean	Std. Error of Mean	n	Median	Mann-Whitney test
	VGlut2 WT	10.73	0.686	319	6.76					VGlut2 WT	15.46	0.7307	189	13.42
	VGlut2 cKO	6.06	0.3628	287	4.16					VGlut2 cKO	17.53	1.008	190	13.78
	cKO/ WT FC	0.564772				<0.0001	Yes			cKO/ WT FC	1.13389				0.5155	No
Layer4	Genotype	Mean	Std. Error of Mean	n	Median	Mann-Whitney test			Layer4	Genotype	Mean	Std. Error of Mean	n	Median	Mann-Whitney test
	VGlut2 WT	6.876	0.4574	300	3.9					VGlut2 WT	20.05	1.062	180	17.21
	VGlut2 cKO	3.597	0.2305	286	2.288					VGlut2 cKO	20.99	1.421	153	16.43
	cKO/ WT FC	0.523124				<0.0001	Yes			cKO/ WT FC	1.04688				0.6221	No
Layer5	Genotype	Mean	Std. Error of Mean	n	Median	Mann-Whitney test			Layer5	Genotype	Mean	Std. Error of Mean	n	Median	Mann-Whitney test
	VGlut2 WT	3.206	0.1708	498	1.976					VGlut2 WT	13.18	0.6144	328	10.61
	VGlut2 cKO	2.54	0.1418	534	1.56					VGlut2 cKO	13.08	0.5494	381	10.19
	cKO/ WT FC	0.792265				0.001	Yes			cKO/ WT FC	0.992413				0.9005	No
Layer6	Genotype	Mean	Std. Error of Mean	n	Median	Mann-Whitney test			Layer6	Genotype	Mean	Std. Error of Mean	n	Median	Mann-Whitney test
	VGlut2 WT	1.449	0.1062	458	0.728					VGlut2 WT	5.516	0.239	411	4.368
	VGlut2 cKO	1.438	0.086	472	0.8321					VGlut2 cKO	4.877	0.26	387	3.224
	cKO/ WT FC	0.992409				0.3111	No			cKO/ WT FC	0.884155				0.0027	Yes
Gpc4									Gpc4
Layer1	Genotype	Mean	Std. Error of Mean	n	Median	Mann-Whitney test	Significant?		Layer1	Genotype	Mean	Std. Error of Mean	n	Median	Mann-Whitney test	Significant?
	VGlut2 WT	1.265	0.0615	458	0.9361					VGlut2 WT	6.514	0.4766	188	5.148
	VGlut2 cKO	2.234	0.1044	518	1.664					VGlut2 cKO	7.292	0.4546	179	5.824
	cKO/ WT FC	1.76601				<0.0001	Yes			cKO/ WT FC	1.11944				0.0868	No
Layer2/3	Genotype	Mean	Std. Error of Mean	n	Median	Mann-Whitney test			Layer2/3	Genotype	Mean	Std. Error of Mean	n	Median	Mann-Whitney test
	VGlut2 WT	2.728	0.1596	326	1.768					VGlut2 WT	5.284	0.3094	199	4.264
	VGlut2 cKO	3.652	0.1995	384	2.496					VGlut2 cKO	6.166	0.4296	174	4.784
	cKO/ WT FC	1.33871				0.0091	Yes			cKO/ WT FC	1.16692				0.1421	No
Layer4	Genotype	Mean	Std. Error of Mean	n	Median	Mann-Whitney test			Layer4	Genotype	Mean	Std. Error of Mean	n	Median	Mann-Whitney test
	VGlut2 WT	2.367	0.1833	276	1.56					VGlut2 WT	6.457	0.4558	163	5.096
	VGlut2 cKO	2.731	0.1681	354	1.456					VGlut2 cKO	5.981	0.3805	164	5.304
	cKO/ WT FC	1.15378				0.2953	No			cKO/ WT FC	0.926282				0.7099	No
Layer5	Genotype	Mean	Std. Error of Mean	n	Median	Mann-Whitney test			Layer5	Genotype	Mean	Std. Error of Mean	n	Median	Mann-Whitney test
	VGlut2 WT	3.282	0.1719	571	1.872					VGlut2 WT	7.744	0.4024	337	5.72
	VGlut2 cKO	3.734	0.1814	629	2.288					VGlut2 cKO	7.232	0.3416	327	5.72
	cKO/ WT FC	1.13772				0.0352	Yes			cKO/ WT FC	0.933884				0.5917	No
Layer6	Genotype	Mean	Std. Error of Mean	n	Median	Mann-Whitney test			Layer6	Genotype	Mean	Std. Error of Mean	n	Median	Mann-Whitney test
	VGlut2 WT	1.995	0.1092	458	1.456					VGlut2 WT	5.77	0.2297	353	4.68
	VGlut2 cKO	2.032	0.09648	568	1.352					VGlut2 cKO	6.337	0.2721	354	5.304
	cKO/ WT FC	1.01855				0.6361	No			cKO/ WT FC	1.09827				0.288	No
Gpc6									Gpc6
Layer1	Genotype	Mean	Std. Error of Mean	n	Median	Mann-Whitney test	Significant?		Layer1	Genotype	Mean	Std. Error of Mean	n	Median	Mann-Whitney test	Significant?
	VGlut2 WT	1.871	0.09346	418	1.352					VGlut2 WT	8.036	0.4569	159	6.76
	VGlut2 cKO	1.667	0.08292	441	1.144					VGlut2 cKO	9.221	0.5902	172	7.332
	cKO/ WT FC	0.890967				0.0581	No			cKO/ WT FC	1.14746				0.3479	No
Layer2/3	Genotype	Mean	Std. Error of Mean	n	Median	Mann-Whitney test			Layer2/3	Genotype	Mean	Std. Error of Mean	n	Median	Mann-Whitney test
	VGlut2 WT	2.453	0.1362	311	1.664					VGlut2 WT	6.046	0.359	173	5.096
	VGlut2 cKO	2.386	0.1291	337	1.664					VGlut2 cKO	6.637	0.3835	211	5.2
	cKO/ WT FC	0.972687				0.7496	No			cKO/ WT FC	1.09775				0.3904	No
Layer4	Genotype	Mean	Std. Error of Mean	n	Median	Mann-Whitney test			Layer4	Genotype	Mean	Std. Error of Mean	n	Median	Mann-Whitney test
	VGlut2 WT	2.699	0.1805	279	1.872					VGlut2 WT	5.225	0.3603	149	4.368
	VGlut2 cKO	1.517	0.09445	314	1.04					VGlut2 cKO	5.662	0.3932	165	4.264
	cKO/ WT FC	0.56206				<0.0001	Yes			cKO/ WT FC	1.08364				0.8164	No
Layer5	Genotype	Mean	Std. Error of Mean	n	Median	Mann-Whitney test			Layer5	Genotype	Mean	Std. Error of Mean	n	Median	Mann-Whitney test
	VGlut2 WT	2.045	0.09322	581	1.248					VGlut2 WT	5.178	0.2482	314	4.056
	VGlut2 cKO	1.564	0.07043	564	1.04					VGlut2 cKO	5.838	0.2618	372	4.472
	cKO/ WT FC	0.764792				0.0012	Yes			cKO/ WT FC	1.12746				0.1726	No
Layer6	Genotype	Mean	Std. Error of Mean	n	Median	Mann-Whitney test			Layer6	Genotype	Mean	Std. Error of Mean	n	Median	Mann-Whitney test
	VGlut2 WT	1.485	0.07707	460	0.9361					VGlut2 WT	4.023	0.1645	364	3.224
	VGlut2 cKO	1.044	0.0509	509	0.624					VGlut2 cKO	4.449	0.2316	336	3.276
	cKO/ WT FC	0.70303				<0.0001	Yes			cKO/ WT FC	1.10589				0.9137	No
