# Supplementary material for: Activity-dependent modulation of synapse-regulating genes in astrocytes
Source: eLife. 2021 Sep 8;10:e70514. doi: 10.7554/eLife.70514 (PMC8497060; doi:10.7554/eLife.70514)
Supplement: Figure 5—source data 1. — (A) Full statistical analysis of mRNA expression differences between WT and KO in Ip3r2 KO model. Averages and analysis calculated for N = 5, i.e, per mouse. (B) Full statistical analysis of mRNA expression differences between WT and KO in Ip3r2 KO model. Averages and analysis calculated for n = ~200–400, that is, total number of astrocytes per group (across five mice). All comparisons are between WT and KO within each layer. [file elife-70514-fig5-data1.xlsx]

## Sheet: Figure 5-Source Data 1A
Related to	Figure 5, Figure 5-figure supplement 1	Differences in mRNA expression between wt and ko in Ip3r2KO model as indicated - full statistical analysis. Averages, and analysis calculated for N=5, i.e. per mouse
Ip3r2 KO P14		Fig5 C-H, Figure 5-figure supplement 1B							Ip3r2 KO P7		Figure 5-figure supplement 1D-G
average per mouse comparison									average per mouse comparison
Comparison between genotypes within each layer									Comparison between genotypes within each layer
Slc1a3 (Chrdl1 group)									Slc1a3 (Chrdl1 group)
Layer1	Genotype	Mean	Std. Error of Mean	N	Median	paired t-test	Significant?		Layer1	Genotype	Mean	Std. Error of Mean	N	Median	paired t-test	Significant?
	Ip3r2 WT	23.5334	2.02016	5	22.2817					Ip3r2 WT	11.0432	1.03628	5	10.4305
	Ip3r2 KO	19.9606	0.571908	5	19.4825					Ip3r2 KO	11.2644	0.824014	5	10.5933
	KO/ WT FC	0.869067	0.0640101	5	0.913914	0.161726	No			KO/ WT FC	1.05284	0.117107	5	1.05352	0.884072	No
Layer2/3	Genotype	Mean	Std. Error of Mean	N	Median	paired t-test			Layer2/3	Genotype	Mean	Std. Error of Mean	N	Median	paired t-test
	Ip3r2 WT	24.9109	3.09587	5	23.7463					Ip3r2 WT	11.777	0.953151	5	11.2003
	Ip3r2 KO	27.1818	4.24735	5	25.1145					Ip3r2 KO	12.9829	0.927302	5	13.5808
	KO/ WT FC	1.11839	0.13935	5	1.15369	0.598631	No			KO/ WT FC	1.11194	0.072067	5	1.20009	0.222882	No
Layer4	Genotype	Mean	Std. Error of Mean	N	Median	paired t-test			Layer4	Genotype	Mean	Std. Error of Mean	N	Median	paired t-test
	Ip3r2 WT	22.7749	1.3374	5	21.7662					Ip3r2 WT	11.4087	1.32787	5	9.99806
	Ip3r2 KO	21.5994	2.23575	5	18.099					Ip3r2 KO	11.0314	1.13865	5	11.1447
	KO/ WT FC	0.951342	0.088037	5	0.928792	0.596733	No			KO/ WT FC	0.979943	0.0781825	5	0.921027	0.668807	No
Layer5	Genotype	Mean	Std. Error of Mean	N	Median	paired t-test			Layer5	Genotype	Mean	Std. Error of Mean	N	Median	paired t-test
	Ip3r2 WT	20.5209	1.49384	5	19.7195					Ip3r2 WT	11.607	1.19763	5	10.0676
	Ip3r2 KO	19.5371	0.747422	5	19.817					Ip3r2 KO	11.0116	0.660148	5	11.8255
	KO/ WT FC	0.967256	0.0599494	5	1.03058	0.504279	No			KO/ WT FC	0.983554	0.10273	5	0.964122	0.672471	No
Layer6	Genotype	Mean	Std. Error of Mean	N	Median	paired t-test			Layer6	Genotype	Mean	Std. Error of Mean	N	Median	paired t-test
	Ip3r2 WT	17.7263	1.48167	5	18.0389					Ip3r2 WT	9.88292	0.98112	5	9.27368
	Ip3r2 KO	18.4283	1.52934	5	17.6585					Ip3r2 KO	10.446	0.980331	5	11.5196
	KO/ WT FC	1.05733	0.092766	5	1.07527	0.720545	No			KO/ WT FC	1.07211	0.0928793	5	1.0423	0.557972	No
Chrdl1									Chrdl1
Layer1	Genotype	Mean	Std. Error of Mean	N	Median	paired t-test	Significant?		Layer1	Genotype	Mean	Std. Error of Mean	N	Median	paired t-test	Significant?
	Ip3r2 WT	7.32042	1.08064	5	8.00233					Ip3r2 WT	7.63838	0.913084	5	8.33478
	Ip3r2 KO	10.6442	0.973813	5	11.8889					Ip3r2 KO	7.96116	0.93063	5	8.66142
	KO/ WT FC	1.52721	0.167915	5	1.48249	0.00884372	Yes			KO/ WT FC	1.05694	0.0921831	5	1.01588	0.639958	No
Layer2/3	Genotype	Mean	Std. Error of Mean	N	Median	paired t-test			Layer2/3	Genotype	Mean	Std. Error of Mean	N	Median	paired t-test
	Ip3r2 WT	12.8181	2.64365	5	11.3569					Ip3r2 WT	7.99518	0.53552	5	7.79874
	Ip3r2 KO	15.4267	2.49228	5	15.5311					Ip3r2 KO	7.18269	0.608601	5	6.99674
	KO/ WT FC	1.27987	0.141702	5	1.11745	0.032047	Yes			KO/ WT FC	0.89896	0.045294	5	0.918658	0.0901377	No
Layer4	Genotype	Mean	Std. Error of Mean	N	Median	paired t-test			Layer4	Genotype	Mean	Std. Error of Mean	N	Median	paired t-test
	Ip3r2 WT	8.80713	1.59466	5	10.0914					Ip3r2 WT	6.46724	0.582839	5	6.40856
	Ip3r2 KO	11.5796	3.42048	5	9.83019					Ip3r2 KO	6.19857	0.324703	5	6.3239
	KO/ WT FC	1.30542	0.214279	5	1.07297	0.310392	No			KO/ WT FC	0.989216	0.102564	5	0.978781	0.701771	No
Layer5	Genotype	Mean	Std. Error of Mean	N	Median	paired t-test			Layer5	Genotype	Mean	Std. Error of Mean	N	Median	paired t-test
	Ip3r2 WT	5.46892	1.02978	5	5.52828					Ip3r2 WT	5.62096	0.737855	5	5.81158
	Ip3r2 KO	8.11836	0.812567	5	7.90791					Ip3r2 KO	4.61753	0.410564	5	4.27114
	KO/ WT FC	1.62986	0.199782	5	1.78217	0.0434172	Yes			KO/ WT FC	0.885127	0.153865	5	0.734937	0.299195	No
Layer6	Genotype	Mean	Std. Error of Mean	N	Median	paired t-test			Layer6	Genotype	Mean	Std. Error of Mean	N	Median	paired t-test
	Ip3r2 WT	2.49901	0.17806	5	2.26618					Ip3r2 WT	2.00408	0.289155	5	2.12491
	Ip3r2 KO	2.73464	0.144786	5	2.61769					Ip3r2 KO	1.93799	0.233008	5	2.05785
	KO/ WT FC	1.12059	0.109255	5	1.14394	0.424692	No			KO/ WT FC	1.04303	0.187805	5	0.920217	0.836811	No
Gpc4									Gpc4
Layer1	Genotype	Mean	Std. Error of Mean	N	Median	paired t-test	Significant?		Layer1	Genotype	Mean	Std. Error of Mean	N	Median	paired t-test	Significant?
	Ip3r2 WT	1.52558	0.12536	5	1.41024					Ip3r2 WT	2.80361	0.176649	5	2.78226
	Ip3r2 KO	1.1101	0.0969113	5	1.08023					Ip3r2 KO	2.54065	0.231875	5	2.75777
	KO/ WT FC	0.74354	0.0741484	5	0.755326	0.0481849	Yes			KO/ WT FC	0.938684	0.133144	5	0.921245	0.541373	No
Layer2/3	Genotype	Mean	Std. Error of Mean	N	Median	paired t-test			Layer2/3	Genotype	Mean	Std. Error of Mean	N	Median	paired t-test
	Ip3r2 WT	3.00824	0.392844	5	2.93458					Ip3r2 WT	2.2242	0.115758	5	2.24323
	Ip3r2 KO	2.58314	0.176066	5	2.55008					Ip3r2 KO	2.16331	0.108632	5	2.09996
	KO/ WT FC	0.921396	0.124347	5	1.03268	0.378585	No			KO/ WT FC	0.97698	0.0436605	5	0.970356	0.59962	No
Layer4	Genotype	Mean	Std. Error of Mean	N	Median	paired t-test			Layer4	Genotype	Mean	Std. Error of Mean	N	Median	paired t-test
	Ip3r2 WT	2.14137	0.112937	5	2.18714					Ip3r2 WT	2.71534	0.315801	5	2.47088
	Ip3r2 KO	1.61771	0.132063	5	1.43502					Ip3r2 KO	2.44946	0.26384	5	2.17836
	KO/ WT FC	0.765465	0.0811101	5	0.740708	0.0442642	Yes			KO/ WT FC	0.907351	0.0434669	5	0.858709	0.102702	No
Layer5	Genotype	Mean	Std. Error of Mean	N	Median	paired t-test			Layer5	Genotype	Mean	Std. Error of Mean	N	Median	paired t-test
	Ip3r2 WT	3.45693	0.443016	5	3.83342					Ip3r2 WT	3.18508	0.249253	5	3.25219
	Ip3r2 KO	2.78853	0.186452	5	2.73561					Ip3r2 KO	3.16166	0.224631	5	2.96031
	KO/ WT FC	0.860876	0.120266	5	0.745099	0.190582	No			KO/ WT FC	1.01889	0.11738	5	0.891629	0.948524	No
Layer6	Genotype	Mean	Std. Error of Mean	N	Median	paired t-test			Layer6	Genotype	Mean	Std. Error of Mean	N	Median	paired t-test
	Ip3r2 WT	2.21028	0.350481	5	1.86458					Ip3r2 WT	2.78181	0.148029	5	2.90125
	Ip3r2 KO	1.24979	0.055506	5	1.26768					Ip3r2 KO	2.93867	0.322469	5	2.68394
	KO/ WT FC	0.604729	0.066989	5	0.694539	0.0383704	Yes			KO/ WT FC	1.05221	0.0813084	5	1.05483	0.557022	No
Gpc6									Gpc6
Layer1	Genotype	Mean	Std. Error of Mean	N	Median	paired t-test	Significant?		Layer1	Genotype	Mean	Std. Error of Mean	N	Median	paired t-test	Significant?
	Ip3r2 WT	2.28843	0.183783	5	2.2366					Ip3r2 WT	2.3796	0.438819	5	1.82138
	Ip3r2 KO	2.20602	0.215824	5	2.08505					Ip3r2 KO	2.85676	0.557042	5	2.16947
	KO/ WT FC	0.991322	0.120602	5	1.06518	0.803362	No			KO/ WT FC	1.19818	0.0818421	5	1.14572	0.0682757	No
Layer2/3	Genotype	Mean	Std. Error of Mean	N	Median	paired t-test			Layer2/3	Genotype	Mean	Std. Error of Mean	N	Median	paired t-test
	Ip3r2 WT	2.57012	0.302574	5	2.61172					Ip3r2 WT	1.99389	0.310254	5	1.90987
	Ip3r2 KO	2.68713	0.268075	5	2.71989					Ip3r2 KO	2.17586	0.362018	5	1.89787
	KO/ WT FC	1.09107	0.160594	5	0.978251	0.740056	No			KO/ WT FC	1.11585	0.111814	5	0.993717	0.482586	No
Layer4	Genotype	Mean	Std. Error of Mean	N	Median	paired t-test			Layer4	Genotype	Mean	Std. Error of Mean	N	Median	paired t-test
	Ip3r2 WT	2.26803	0.199002	5	2.01173					Ip3r2 WT	1.24294	0.274464	5	0.975344
	Ip3r2 KO	2.11558	0.2044	5	2.25869					Ip3r2 KO	1.78142	0.3	5	1.98678
	KO/ WT FC	0.937294	0.0707532	5	0.872189	0.366913	No			KO/ WT FC	1.52739	0.172651	5	1.28604	0.0150742	Yes
Layer5	Genotype	Mean	Std. Error of Mean	N	Median	paired t-test			Layer5	Genotype	Mean	Std. Error of Mean	N	Median	paired t-test
	Ip3r2 WT	2.37087	0.285141	5	2.63805					Ip3r2 WT	1.65478	0.366454	5	1.31173
	Ip3r2 KO	2.17644	0.343066	5	1.82861					Ip3r2 KO	1.82392	0.269857	5	1.8799
	KO/ WT FC	0.942176	0.125539	5	1.01874	0.607941	No			KO/ WT FC	1.17739	0.118154	5	1.16932	0.375275	No
Layer6	Genotype	Mean	Std. Error of Mean	N	Median	paired t-test			Layer6	Genotype	Mean	Std. Error of Mean	N	Median	paired t-test
	Ip3r2 WT	1.91377	0.142123	5	1.90606					Ip3r2 WT	1.5432	0.355686	5	1.34252
	Ip3r2 KO	2.17555	0.225647	5	2.203					Ip3r2 KO	1.38483	0.193255	5	1.29041
	KO/ WT FC	1.13738	0.0870056	5	1.07476	0.155482	No			KO/ WT FC	0.969677	0.0910588	5	0.961182	0.448735	No

## Sheet: Figure 5-Source Data 1B
Related to	Figure 5, Figure 5-figure supplement 1	Differences in mRNA expression between wt and ko in Ip3r2KO model as indicated - full statistical analysis. Averages, and analysis calculated for N=~200-400, i.e. total number of astrocytes per group (across the 5 mice)
Ip3r2 KO P14		Fig5 C-H, Figure 5-figure supplement 1B							Ip3r2 KO P7		Figure 5-figure supplement 1D-G
single cell comparison									single cell comparison
Comparison between genotypes within each layer									Comparison between genotypes within each layer
Slc1a3 (Chrdl1 group)									Slc1a3 (Chrdl1 group)
Layer1	Genotype	Mean	Std. Error of Mean	n	Median	Mann-Whitney test	Significant?		Layer1	Genotype	Mean	Std. Error of Mean	n	Median	Mann-Whitney test	Significant?
	Ip3r2 WT	23.14	0.939	401	18.41					Ip3r2 WT	11.52	0.564	228	9.361
	Ip3r2 KO	20.01	0.7638	337	17.06					Ip3r2 KO	11.11	0.5558	239	8.529
	KO/ WT FC	0.864736				0.1159	No			KO/ WT FC	0.96441				0.4781	No
Layer2/3	Genotype	Mean	Std. Error of Mean	n	Median	Mann-Whitney test			Layer2/3	Genotype	Mean	Std. Error of Mean	n	Median	Mann-Whitney test
	Ip3r2 WT	24.83	1.148	426	17.06					Ip3r2 WT	11.86	0.5205	236	10.3
	Ip3r2 KO	27.09	1.224	432	19.03					Ip3r2 KO	13.32	0.6179	228	11.28
	KO/ WT FC	1.09102				0.0834	No			KO/ WT FC	1.1231				0.1332	No
Layer4	Genotype	Mean	Std. Error of Mean	n	Median	Mann-Whitney test			Layer4	Genotype	Mean	Std. Error of Mean	n	Median	Mann-Whitney test
	Ip3r2 WT	22.78	1.125	371	15.91					Ip3r2 WT	11.23	0.535	235	9.465
	Ip3r2 KO	21.63	1.043	374	15.24					Ip3r2 KO	11.66	0.498	261	9.985
	KO/ WT FC	0.949517				0.8763	No			KO/ WT FC	1.03829				0.5298	No
Layer5	Genotype	Mean	Std. Error of Mean	n	Median	Mann-Whitney test			Layer5	Genotype	Mean	Std. Error of Mean	n	Median	Mann-Whitney test
	Ip3r2 WT	20.41	0.7649	563	15.39					Ip3r2 WT	11.84	0.4191	338	10.61
	Ip3r2 KO	19.52	0.7208	586	14.04					Ip3r2 KO	11.23	0.4089	372	9.257
	KO/ WT FC	0.956394				0.6629	No			KO/ WT FC	0.94848				0.153	No
Layer6	Genotype	Mean	Std. Error of Mean	n	Median	Mann-Whitney test			Layer6	Genotype	Mean	Std. Error of Mean	n	Median	Mann-Whitney test
	Ip3r2 WT	17.35	0.6216	560	13.36					Ip3r2 WT	10.02	0.3243	443	8.737
	Ip3r2 KO	18.3	0.6693	503	14.35					Ip3r2 KO	10.78	0.3035	511	9.673
	KO/ WT FC	1.05476				0.1504	No			KO/ WT FC	1.07585				0.0462	Yes
Chrdl1									Chrdl1
Layer1	Genotype	Mean	Std. Error of Mean	n	Median	Mann-Whitney test	Significant?		Layer1	Genotype	Mean	Std. Error of Mean	n	Median	Mann-Whitney test	Significant?
	Ip3r2 WT	7.139	0.3738	401	4.992					Ip3r2 WT	7.763	0.3591	228	6.344
	Ip3r2 KO	10.5	0.4958	337	8.217					Ip3r2 KO	7.631	0.3968	239	5.512
	KO/ WT FC	1.47079				<0.0001	Yes			KO/ WT FC	0.982996				0.2919	No
Layer2/3	Genotype	Mean	Std. Error of Mean	n	Median	Mann-Whitney test			Layer2/3	Genotype	Mean	Std. Error of Mean	n	Median	Mann-Whitney test
	Ip3r2 WT	13.44	0.7256	426	8.113					Ip3r2 WT	7.98	0.3805	236	7.02
	Ip3r2 KO	15.93	0.7944	432	9.985					Ip3r2 KO	7.166	0.3237	228	6.188
	KO/ WT FC	1.18527				0.0022	Yes			KO/ WT FC	0.897995				0.2389	No
Layer4	Genotype	Mean	Std. Error of Mean	n	Median	Mann-Whitney test			Layer4	Genotype	Mean	Std. Error of Mean	n	Median	Mann-Whitney test
	Ip3r2 WT	9.161	0.5682	371	5.2					Ip3r2 WT	6.313	0.2987	235	5.304
	Ip3r2 KO	12.88	0.9523	374	6.968					Ip3r2 KO	6.317	0.2877	261	5.512
	KO/ WT FC	1.40596				0.0011	Yes			KO/ WT FC	1.00063				0.7948	No
Layer5	Genotype	Mean	Std. Error of Mean	n	Median	Mann-Whitney test			Layer5	Genotype	Mean	Std. Error of Mean	n	Median	Mann-Whitney test
	Ip3r2 WT	5.35	0.2739	563	3.016					Ip3r2 WT	5.399	0.2226	338	4.524
	Ip3r2 KO	8.428	0.3772	586	5.044					Ip3r2 KO	4.684	0.2045	372	3.952
	KO/ WT FC	1.57533				<0.0001	Yes			KO/ WT FC	0.867568				0.0049	Yes
Layer6	Genotype	Mean	Std. Error of Mean	n	Median	Mann-Whitney test			Layer6	Genotype	Mean	Std. Error of Mean	n	Median	Mann-Whitney test
	Ip3r2 WT	2.445	0.1434	560	1.352					Ip3r2 WT	1.91	0.113	443	1.248
	Ip3r2 KO	2.714	0.1525	503	1.456					Ip3r2 KO	1.905	0.08814	511	1.352
	KO/ WT FC	1.11002				0.1906	No			KO/ WT FC	0.997382				0.6004	No
Gpc4									Gpc4
Layer1	Genotype	Mean	Std. Error of Mean	n	Median	Mann-Whitney test	Significant?		Layer1	Genotype	Mean	Std. Error of Mean	n	Median	Mann-Whitney test	Significant?
	Ip3r2 WT	1.535	0.0859	401	0.9361					Ip3r2 WT	2.847	0.1328	288	2.392
	Ip3r2 KO	1.116	0.06626	347	0.728					Ip3r2 KO	2.501	0.1302	245	2.08
	KO/ WT FC	0.727036				0.0057	Yes			KO/ WT FC	0.878469				0.0496	Yes
Layer2/3	Genotype	Mean	Std. Error of Mean	n	Median	Mann-Whitney test			Layer2/3	Genotype	Mean	Std. Error of Mean	n	Median	Mann-Whitney test
	Ip3r2 WT	2.924	0.1561	421	1.768					Ip3r2 WT	2.239	0.107	278	1.872
	Ip3r2 KO	2.601	0.1429	456	1.456					Ip3r2 KO	2.126	0.1121	252	1.768
	KO/ WT FC	0.889535				0.2486	No			KO/ WT FC	0.949531				0.2851	No
Layer4	Genotype	Mean	Std. Error of Mean	n	Median	Mann-Whitney test			Layer4	Genotype	Mean	Std. Error of Mean	n	Median	Mann-Whitney test
	Ip3r2 WT	2.11	0.1142	372	1.352					Ip3r2 WT	2.64	0.1658	279	1.872
	Ip3r2 KO	1.638	0.08569	392	1.04					Ip3r2 KO	2.394	0.122	279	1.976
	KO/ WT FC	0.776303				0.0247	Yes			KO/ WT FC	0.906818				0.4735	No
Layer5	Genotype	Mean	Std. Error of Mean	n	Median	Mann-Whitney test			Layer5	Genotype	Mean	Std. Error of Mean	n	Median	Mann-Whitney test
	Ip3r2 WT	3.483	0.1674	557	2.184					Ip3r2 WT	3.238	0.1591	388	2.496
	Ip3r2 KO	2.797	0.1537	516	1.664					Ip3r2 KO	3.195	0.1527	371	2.392
	KO/ WT FC	0.803043				0.0041	Yes			KO/ WT FC	0.98672				0.618	No
Layer6	Genotype	Mean	Std. Error of Mean	n	Median	Mann-Whitney test			Layer6	Genotype	Mean	Std. Error of Mean	n	Median	Mann-Whitney test
	Ip3r2 WT	2.247	0.1311	557	1.352					Ip3r2 WT	2.868	0.1066	522	2.34
	Ip3r2 KO	1.274	0.06367	587	0.728					Ip3r2 KO	2.805	0.1097	489	2.184
	KO/ WT FC	0.566978				<0.0001	Yes			KO/ WT FC	0.978033				0.6355	No
Gpc6									Gpc6
Layer1	Genotype	Mean	Std. Error of Mean	n	Median	Mann-Whitney test	Significant?		Layer1	Genotype	Mean	Std. Error of Mean	n	Median	Mann-Whitney test	Significant?
	Ip3r2 WT	2.221	0.104	406	1.56					Ip3r2 WT	2.335	0.1426	220	1.768
	Ip3r2 KO	2.23	0.09883	344	1.82					Ip3r2 KO	2.718	0.1564	278	2.08
	KO/ WT FC	1.00405				0.3711	No			KO/ WT FC	1.16403				0.0469	Yes
Layer2/3	Genotype	Mean	Std. Error of Mean	n	Median	Mann-Whitney test			Layer2/3	Genotype	Mean	Std. Error of Mean	n	Median	Mann-Whitney test
	Ip3r2 WT	2.565	0.1359	338	1.768					Ip3r2 WT	1.965	0.121	206	1.56
	Ip3r2 KO	2.799	0.1458	365	1.976					Ip3r2 KO	2.19	0.1505	261	1.664
	KO/ WT FC	1.09123				0.2612	No			KO/ WT FC	1.1145				0.3193	No
Layer4	Genotype	Mean	Std. Error of Mean	n	Median	Mann-Whitney test			Layer4	Genotype	Mean	Std. Error of Mean	n	Median	Mann-Whitney test
	Ip3r2 WT	2.19	0.1295	322	1.352					Ip3r2 WT	1.319	0.09069	227	1.319
	Ip3r2 KO	2.14	0.1335	352	1.248					Ip3r2 KO	1.778	0.1112	265	1.778
	KO/ WT FC	0.977169				0.5011	No			KO/ WT FC	1.34799				0.0015	Yes
Layer5	Genotype	Mean	Std. Error of Mean	n	Median	Mann-Whitney test			Layer5	Genotype	Mean	Std. Error of Mean	n	Median	Mann-Whitney test
	Ip3r2 WT	2.383	0.1074	532	1.56					Ip3r2 WT	1.672	0.09969	311	1.144
	Ip3r2 KO	2.296	0.1181	514	1.56					Ip3r2 KO	1.876	0.1049	347	1.352
	KO/ WT FC	0.963491				0.2188	No			KO/ WT FC	1.12201				0.1701	No
Layer6	Genotype	Mean	Std. Error of Mean	n	Median	Mann-Whitney test			Layer6	Genotype	Mean	Std. Error of Mean	n	Median	Mann-Whitney test
	Ip3r2 WT	1.91	0.08173	499	1.456					Ip3r2 WT	1.483	0.1105	447	1.04
	Ip3r2 KO	2.257	0.09101	522	1.768					Ip3r2 KO	1.358	0.05943	449	1.144
	KO/ WT FC	1.18168				0.0219	Yes			KO/ WT FC	0.915711				0.8968	No
